# Supplementary material for: Lifestyles shape genome size and gene content in fungal pathogens
Source: eLife. 2025 Dec 16;14:RP104975. doi: 10.7554/eLife.104975 (PMC12707824; doi:10.7554/eLife.104975)
Supplement: Figure 1—source data 1. [file elife-104975-fig1-data1.xlsx]

## Sheet: Figure1_SourceData1
t1	t2	statistic	rho	pval	p.adjust
assembly_length	genes	9021092	0.695068	0	0
assembly_length	frac_repeats_dec	23550458	0.203945	1.14656e-06	3.43968e-06
assembly_length	assembly_noreps	3687102	0.875368	0	0
assembly_length	propGC	38265840	-0.293466	1.60948e-12	7.58753e-12
assembly_length	N_introns	19846646	0.329142	1.51631e-15	7.69819e-15
assembly_length	F_intron_genes	35539850	-0.201322	1.57822e-06	4.52879e-06
assembly_length	LEN_introns	26936010	0.0895063	0.0339155	0.0486614
assembly_length	LEN_exons	41921794	-0.417045	0	0
assembly_length	LEN_intergenic	24245656	0.180446	1.73527e-05	4.24177e-05
assembly_length	tRNA	2.62912e+07	0.111302	0.00826831	0.0129931
assembly_length	pseudo_tRNA	2.12887e+07	0.280398	1.29919e-11	5.71642e-11
genes	frac_repeats_dec	34876748	-0.178907	2.04986e-05	4.83181e-05
genes	assembly_noreps	5418388	0.816847	0	0
genes	propGC	25722406	0.130529	0.00194458	0.00340329
genes	N_introns	16769876	0.433143	0	0
genes	F_intron_genes	36792248	-0.243655	5.45884e-09	2.11931e-08
genes	LEN_introns	31605666	-0.0683379	0.105576	0.131472
genes	LEN_exons	44594836	-0.507399	0	0
genes	LEN_intergenic	35239976	-0.191185	5.2196e-06	1.43539e-05
genes	tRNA	2.70134e+07	0.0868898	0.0394784	0.0554378
genes	pseudo_tRNA	2.49513e+07	0.156593	0.000193741	0.000412481
frac_repeats_dec	assembly_noreps	33036168	-0.116692	0.00563535	0.00907153
frac_repeats_dec	propGC	39813750	-0.345788	3.13272e-17	1.723e-16
frac_repeats_dec	N_introns	33442716	-0.130434	0.00195947	0.00340329
frac_repeats_dec	F_intron_genes	30620886	-0.0350502	0.406805	0.470237
frac_repeats_dec	LEN_introns	22867864	0.227018	5.77156e-08	2.00486e-07
frac_repeats_dec	LEN_exons	25532412	0.136951	0.00114555	0.00213534
frac_repeats_dec	LEN_intergenic	23320872	0.211706	4.34935e-07	1.36694e-06
frac_repeats_dec	tRNA	2.96548e+07	-0.00239386	0.954845	0.954845
frac_repeats_dec	pseudo_tRNA	2.55415e+07	0.136644	0.00116473	0.00213534
assembly_noreps	propGC	33116232	-0.119398	0.00461382	0.00761281
assembly_noreps	N_introns	17422526	0.411082	0	0
assembly_noreps	F_intron_genes	34820048	-0.176991	2.51781e-05	5.73019e-05
assembly_noreps	LEN_introns	29209294	0.0126645	0.76443	0.813748
assembly_noreps	LEN_exons	44662986	-0.509703	0	0
assembly_noreps	LEN_intergenic	25082434	0.152161	0.000298764	0.0006162
assembly_noreps	tRNA	2.52592e+07	0.146185	0.00050796	0.000986041
assembly_noreps	pseudo_tRNA	2.32837e+07	0.212964	3.46975e-07	1.14502e-06
propGC	N_introns	28253010	0.0449889	0.286917	0.344301
propGC	F_intron_genes	32435958	-0.0964035	0.0223081	0.0342403
propGC	LEN_introns	28561182	0.0345721	0.413239	0.470237
propGC	LEN_exons	29757688	-0.00587234	0.889492	0.917288
propGC	LEN_intergenic	44513310	-0.504643	0	0
propGC	tRNA	3.50227e+07	-0.183841	1.15476e-05	2.93131e-05
propGC	pseudo_tRNA	3.19649e+07	-0.080482	0.0565469	0.0777521
N_introns	F_intron_genes	15667874	0.470393	0	0
N_introns	LEN_introns	27363940	0.0750414	0.0754887	0.101679
N_introns	LEN_exons	49897922	-0.686655	0	0
N_introns	LEN_intergenic	29143086	0.0149025	0.724368	0.783742
N_introns	tRNA	3.0069e+07	-0.0163969	0.698109	0.767919
N_introns	pseudo_tRNA	2.69247e+07	0.0898885	0.0331292	0.0485895
F_intron_genes	LEN_introns	26001160	0.121106	0.00405849	0.00686822
F_intron_genes	LEN_exons	34028536	-0.150236	0.000356691	0.000713382
F_intron_genes	LEN_intergenic	21778206	0.263851	2.46391e-10	1.01636e-09
F_intron_genes	tRNA	2.84445e+07	0.0385177	0.362071	0.426726
F_intron_genes	pseudo_tRNA	3.17523e+07	-0.0732928	0.0825665	0.108988
LEN_introns	LEN_exons	29070688	0.0173497	0.68141	0.762255
LEN_introns	LEN_intergenic	27500296	0.0704323	0.0952968	0.120954
LEN_introns	tRNA	3.46261e+07	-0.170435	4.88253e-05	0.000107416
LEN_introns	pseudo_tRNA	2.68635e+07	0.0919583	0.0292739	0.0439108
LEN_exons	LEN_intergenic	29355750	0.00771401	0.85517	0.895893
LEN_exons	tRNA	2.77706e+07	0.0612939	0.146725	0.179331
LEN_exons	pseudo_tRNA	3.50361e+07	-0.184293	1.09789e-05	2.89843e-05
LEN_intergenic	tRNA	2.27937e+07	0.229526	3.73842e-08	1.37075e-07
LEN_intergenic	pseudo_tRNA	2.94549e+07	0.00436331	0.917797	0.931917
tRNA	pseudo_tRNA	2.74912e+07	0.0707391	0.0938668	0.120954
