# Supplementary material for: Lifestyles shape genome size and gene content in fungal pathogens
Source: eLife. 2025 Dec 16;14:RP104975. doi: 10.7554/eLife.104975 (PMC12707824; doi:10.7554/eLife.104975)
Supplement: Figure 1—source data 2. [file elife-104975-fig1-data2.xlsx]

## Sheet: Figure1_SourceData2_eigenvector
order	Row.names	PC1	PC2	PC3	PC4	PC5	PC6	PC7	PC8	PC9	PC10	PC11	assembly_length	Ophiostomatales	order_col
Hypocreales	ALECA	-1.38905	-1.03503	-0.183645	-0.241512	-0.733236	0.742693	-0.696143	0.11665	0.0049651	-0.217117	0.0335969	35484800	no	deepskyblue4
Hypocreales	CFUMO	-1.76181	-0.970787	0.612581	0.085244	-0.0585679	0.839539	-0.272822	0.313322	0.0903552	-0.28387	0.0307405	33280686	no	deepskyblue4
Hypocreales	FFLAG	0.725187	-1.18621	-0.988368	0.654424	0.230896	-0.383092	0.419604	0.0415992	-0.184552	-0.0312109	0.198817	39419815	no	deepskyblue4
Hypocreales	BOBTE	-1.77422	0.435777	1.27174	0.503521	-0.394711	-0.32278	-0.365973	-0.565094	0.0536277	-0.1624	-0.0847069	27946427	no	deepskyblue4
Hypocreales	CFUCK	0.278804	-0.474588	0.804147	0.190699	-0.449059	0.0517101	-0.374629	0.36502	0.248277	-0.152222	-0.175977	38563379	no	deepskyblue4
Hypocreales	APENI	2.16303	0.721873	0.174093	0.523329	0.736987	0.666379	-0.122623	0.217189	0.462358	0.184302	-0.175598	53763490	no	deepskyblue4
Hypocreales	CFARI	-2.22001	-1.18092	-0.181799	-0.285112	-0.385916	0.765688	-0.415473	-0.0430305	-0.171911	-0.164001	-0.095785	33586432	no	deepskyblue4
Hypocreales	CCYLI	1.02646	-1.28384	0.604411	-0.110556	-0.371388	0.774111	-0.303444	0.340575	0.284413	0.0169679	-0.12873	42889859	no	deepskyblue4
Hypocreales	AYAMA	-1.27577	-1.18407	1.58252	-0.236957	-0.0345574	0.489323	-0.55601	0.649717	-0.0223191	0.126384	-0.118298	31362364	no	deepskyblue4
Hypocreales	BBRON	-1.60538	-0.598899	0.0734135	0.190035	-0.665624	0.163329	-0.655027	-0.113569	0.121414	-0.237289	-0.0318629	32300248	no	deepskyblue4
Hypocreales	ATEXE	-1.70102	0.684188	1.34598	0.500878	-0.063224	-0.288788	-0.496861	-0.757675	0.245942	-0.138763	-0.0786728	28436008	no	deepskyblue4
Hypocreales	CFUJI	2.74032	-0.768801	-2.00724	-0.702089	0.829041	0.592855	0.284913	0.23677	0.373331	0.153752	-0.199546	61429532	no	deepskyblue4
Hypocreales	CARBU	1.21522	0.253354	1.36834	0.471987	0.386972	0.938166	-0.503743	-0.320165	0.152178	0.0350119	-0.181385	44208191	no	deepskyblue4
Hypocreales	FINCA	0.799566	-1.05446	-0.794537	0.737182	-0.0321847	-0.881126	0.251743	0.034259	-0.0740698	0.00345979	0.145653	37306754	no	deepskyblue4
Hypocreales	CHONGK	3.17321	-0.759012	-2.28552	-0.816726	0.841263	0.112295	0.343016	0.0646114	0.312249	0.184615	-0.219182	61637082	no	deepskyblue4
Hypocreales	CILIC	3.33895	0.0984124	-3.01032	-0.813988	0.655343	0.481963	0.368798	0.0216001	0.406086	0.134116	-0.343609	69881126	no	deepskyblue4
Hypocreales	CHENR	0.467021	-0.78956	-1.35483	-0.246275	-0.31476	-0.218283	-0.196711	-0.0847866	-0.414858	-0.323073	-0.184823	44062731	no	deepskyblue4
Hypocreales	CHONGH	2.73064	-0.864702	-2.16246	-0.882238	0.709891	0.611601	0.206187	0.189869	0.36188	0.156179	-0.21207	61702589	no	deepskyblue4
Hypocreales	CPAUC	2.80865	-0.696546	-2.08668	-0.697161	0.583504	0.747789	0.349115	0.253331	0.485967	0.216812	-0.164265	62529526	no	deepskyblue4
Hypocreales	CPSEUN	1.70931	1.67087	-2.58132	-0.469801	-0.546319	-1.13853	-0.401401	0.0501623	-0.129265	0.143435	-0.0700974	54973961	no	deepskyblue4
Hypocreales	CPSEUR	2.6187	-0.340806	-2.1331	-0.555479	0.760836	0.61538	0.474839	0.118448	0.431981	0.234235	-0.311803	63390546	no	deepskyblue4
Hypocreales	CPSEUT	3.20971	-0.563986	-2.5195	-0.948952	0.431911	-0.0475903	0.271151	0.0931236	0.235123	0.206372	-0.213331	62018295	no	deepskyblue4
Hypocreales	CACIC	2.78128	-0.800487	-2.02173	-0.705708	0.826971	0.585829	0.301871	0.243538	0.399805	0.116636	-0.193469	61575718	no	deepskyblue4
Hypocreales	CCROU	2.3596	-1.01633	-1.72773	-0.663107	0.901984	0.495317	0.153414	0.183667	0.266539	0.153772	-0.244181	57890290	no	deepskyblue4
Hypocreales	FNAPI	1.19596	-1.09993	-0.694465	0.52345	-0.345431	-0.0520619	0.233726	0.0167854	-0.126577	0.00985828	0.181599	40907066	no	deepskyblue4
Hypocreales	FNELS	0.893254	-0.895249	-0.771805	0.698663	0.0404677	-0.411008	0.0870897	-0.145169	-0.0763694	-0.0837774	0.0314696	40193782	no	deepskyblue4
Hypocreales	FNEMA	1.50347	-1.66404	-0.414958	-0.66366	-0.310291	1.24984	0.095604	0.461197	0.180651	-0.266823	0.0863106	49296884	no	deepskyblue4
Hypocreales	FNEOC	1.9416	-1.54977	-0.729829	-0.479992	-0.121039	0.921887	0.259855	0.267049	0.0262832	-0.257092	0.0590075	50269434	no	deepskyblue4
Hypocreales	FNEPA	0.752407	-0.88026	-0.193883	1.07979	0.0386045	-0.768585	0.125772	-0.0595995	0.0671512	0.0675099	0.0841521	35720819	no	deepskyblue4
Hypocreales	FFLOR	1.70383	-1.46504	-0.674253	-0.13773	-0.306526	0.431919	0.181555	0.339966	0.099268	0.108275	0.0806444	46295311	no	deepskyblue4
Hypocreales	CNAVI	2.76474	-1.46575	-2.40516	-1.04568	0.385999	0.567846	0.436457	0.0666569	0.188798	0.129145	-0.136781	59758376	no	deepskyblue4
Hypocreales	FFRAC	1.55508	-0.908031	-0.980364	0.615323	0.271006	0.433999	0.412	-0.0969702	0.00734784	0.211563	0.130079	46242123	no	deepskyblue4
Hypocreales	FNURR	0.514648	-1.06474	-0.222383	0.790362	-0.0392467	-0.954984	-0.0478939	0.0375991	-0.0571376	-0.0720311	-0.00674271	34991485	no	deepskyblue4
Hypocreales	FNYGA	1.9705	-0.729751	-1.09653	0.325846	0.448752	0.687268	0.418655	-0.230841	0.229426	0.110878	0.0890187	50897187	no	deepskyblue4
Hypocreales	FODOR	1.76311	-0.809136	-0.850856	0.657738	0.210875	0.286202	0.418249	-0.124714	0.0470237	0.0654408	0.109455	46399003	no	deepskyblue4
Hypocreales	FOXYS	2.80213	-0.697436	-1.88701	-0.637328	0.610611	1.09267	0.454234	-0.627427	0.640784	0.061585	-0.0815279	61172284	no	deepskyblue4
Hypocreales	FNANU	0.600979	-0.982925	-0.700611	0.82091	0.070001	-0.776049	0.314291	0.0941902	-0.085146	-0.0525985	0.176377	36837237	no	deepskyblue4
Hypocreales	EAOTE	-2.17448	2.01803	0.67759	1.52111	-1.01123	0.30167	1.25296	0.140617	0.20399	-0.0902861	-0.0874968	33221458	no	deepskyblue4
Hypocreales	EBACO	-2.29522	2.65466	0.370285	1.87201	-1.01604	0.605469	1.74072	0.285495	0.217297	-0.073538	-0.0986291	37010839	no	deepskyblue4
Hypocreales	EBRAC	-2.76225	3.12755	-0.0655878	2.18097	-0.889705	1.14744	2.44271	0.768022	0.0155769	-0.230991	-0.132984	42796446	no	deepskyblue4
Hypocreales	EBROM	-2.16797	2.662	0.321241	1.9438	-0.461861	0.611585	1.4681	-0.106095	0.32372	0.00175699	-0.11945	37704046	no	deepskyblue4
Hypocreales	EELYM	-2.24606	0.104672	1.48972	0.527986	-0.421712	-0.311468	0.00647239	-0.289119	0.169499	-0.0671678	-0.112039	24332323	no	deepskyblue4
Hypocreales	BFELI	-0.927753	-1.41023	1.513	0.495377	0.0176833	-0.0703267	-0.31795	0.631416	0.146481	0.0651409	-0.129775	29270057	no	deepskyblue4
Hypocreales	FFOET	1.26113	-1.33561	-0.981753	0.342841	-0.326114	0.550722	0.164583	-0.250046	-0.23061	-0.237399	0.22271	43483408	no	deepskyblue4
Hypocreales	CaffPURP	-2.15174	0.184643	1.34412	-0.35948	0.203331	0.0833859	-0.272002	-0.759958	-0.256374	-0.236582	0.0681523	29026825	no	deepskyblue4
Hypocreales	CAFRI	-3.57776	3.29554	-0.885728	0.251229	-1.328	0.591194	1.55594	-0.13545	-0.510849	-0.199859	0.34148	37007412	no	deepskyblue4
Hypocreales	CARUN	-2.05392	0.316641	1.25727	-0.418354	0.29934	0.135834	-0.295559	-0.834223	-0.293618	-0.260779	0.118633	29942391	no	deepskyblue4
Hypocreales	CCAPE	-2.36007	0.173263	1.35261	-0.287013	0.233558	-0.0986887	-0.348724	-0.832327	-0.187941	-0.233072	0.0714936	27440289	no	deepskyblue4
Hypocreales	CcfPURP	-1.98823	0.162758	1.25814	-0.37363	0.228357	0.147051	-0.273036	-0.835774	-0.299956	-0.322901	0.0665354	30119352	no	deepskyblue4
Hypocreales	CCITR	-4.01545	2.84278	-0.413643	1.22652	-0.795058	1.31333	2.77606	0.530915	-0.514485	-0.168477	-0.074523	40026155	no	deepskyblue4
Hypocreales	CCYPE	-2.67981	0.0728629	1.31132	-0.272197	0.0245683	-0.0887533	-0.260082	-0.847731	-0.234757	-0.327206	0.0715525	26032281	no	deepskyblue4
Hypocreales	CDIGI	-3.38712	1.9818	-0.122703	0.310787	-0.28501	0.506855	0.986444	-0.740492	-0.232697	-0.16105	0.171291	32731831	no	deepskyblue4
Hypocreales	CFUSI	-3.524	4.47536	-0.711314	1.53813	-0.428496	1.42087	2.98734	0.0270135	0.0440484	-0.272805	0.0664805	50678133	no	deepskyblue4
Hypocreales	CHUMI	-2.18425	0.070193	1.03828	-0.39829	0.396698	0.378668	-0.283681	-0.838006	-0.377508	-0.269146	0.0826414	30721321	no	deepskyblue4
Hypocreales	CLOVE	-4.38267	2.93821	-2.21853	-0.391576	-2.40512	0.923042	1.41188	-0.6346	-0.899896	-0.411235	0.128323	39895602	no	deepskyblue4
Hypocreales	CMAXI	-3.12169	2.12949	0.326608	0.424679	-0.0285865	0.428973	1.02028	-0.708553	-0.0132684	-0.09912	0.167823	32793520	no	deepskyblue4
Hypocreales	CLEUCT	2.26912	-0.814136	-2.20641	-0.7911	0.401512	0.825894	0.369493	0.296975	0.361348	0.110289	-0.157227	61113270	no	deepskyblue4
Hypocreales	CPASP	-3.46444	1.20131	0.688247	-0.127715	0.202289	0.232012	0.775953	-0.254132	-0.0930343	-0.223267	0.184193	29041803	no	deepskyblue4
Hypocreales	CPAZO	-2.33242	0.211847	1.41467	-0.286251	0.223881	-0.102723	-0.327222	-0.804721	-0.220423	-0.217689	0.0821592	27282838	no	deepskyblue4
Hypocreales	CPURP	-1.84674	0.56781	1.16217	-0.148275	0.737991	0.380707	-0.409659	-1.10454	-0.161295	-0.162193	0.120263	32067314	no	deepskyblue4
Hypocreales	CPUSI	-4.44074	3.08428	-1.88536	0.554515	-1.03125	1.54883	2.1086	-0.362909	-0.78513	-0.390291	0.0278567	44623426	no	deepskyblue4
Hypocreales	CSORG	-4.61724	1.81361	-1.14889	0.330837	-0.492161	1.32332	1.68596	-0.255924	-0.881976	-0.276727	0.161201	34529487	no	deepskyblue4
Hypocreales	FMUSA	1.40662	-0.884831	-0.522962	0.440335	-0.444209	-0.129534	0.178745	-0.0778548	-0.0265541	0.0350069	0.128516	41665269	no	deepskyblue4
Hypocreales	CROSE	3.81192	0.168776	0.374038	-0.375203	0.376294	1.40706	0.266431	-0.308203	0.672708	0.0600257	-0.0474303	60683581	no	deepskyblue4
Hypocreales	CPACH	-0.671796	-0.416938	1.81025	1.10776	-0.401164	-1.01445	-0.296017	0.0856022	0.325911	0.0603858	-0.11739	25627517	no	deepskyblue4
Hypocreales	FASIA	0.721814	-0.783282	-0.273773	0.990268	-0.323357	-0.6287	-0.0429959	-0.107567	0.102326	0.047586	0.0679546	36220696	no	deepskyblue4
Hypocreales	FAUSTF	1.15862	-1.09179	-0.916665	0.501199	0.182306	0.197028	0.355195	-0.227746	0.0332807	-0.0400744	0.0974883	43840621	no	deepskyblue4
Hypocreales	FAUSTM	0.901232	-0.876004	-0.308681	1.0914	0.151864	-0.685777	0.199413	-0.0896084	0.0386998	0.104069	0.0652828	37061782	no	deepskyblue4
Hypocreales	FAVEN	1.47385	-0.785958	-0.849793	0.568261	-0.0235348	-0.357618	0.114157	-0.15579	0.106824	0.157019	0.0260028	43054013	no	deepskyblue4
Hypocreales	FNEWN	1.06826	-1.40152	-1.43897	0.196396	-0.401989	0.877277	0.166524	-0.323605	-0.35302	-0.287887	0.260709	44998086	no	deepskyblue4
Hypocreales	FBABI	1.46897	-1.12865	-0.702169	0.639475	0.377163	-0.0518658	0.430816	-0.156214	-0.0612057	0.0623488	0.110199	42961351	no	deepskyblue4
Hypocreales	DCONI	-2.40397	0.254479	0.708659	-0.22829	0.297498	0.455413	-0.785386	0.528766	-0.00891326	0.191442	-0.079642	32831003	no	deepskyblue4
Hypocreales	FBEGO	1.51	-1.08723	-0.787418	0.333436	-0.448471	0.100135	0.168578	-0.147478	-0.0672095	0.126926	0.136106	43039688	no	deepskyblue4
Hypocreales	FBEOM	1.71525	-0.838541	-0.918629	0.364059	-0.248857	-0.0556971	0.15751	-0.284992	0.0244954	0.0648621	-0.0059888	45241328	no	deepskyblue4
Hypocreales	FBOOT	0.869509	-0.834878	-0.233805	1.11895	0.0370209	-0.710226	0.154571	-0.11857	0.000108777	0.09965	0.0672008	36363344	no	deepskyblue4
Hypocreales	FBRASC	0.849957	-0.940582	-0.238475	1.18548	0.358094	-0.602075	0.250507	-0.0761064	0.0411596	0.0687597	0.0825144	36908028	no	deepskyblue4
Hypocreales	AHYPO	-1.89386	2.1749	0.740915	1.56227	-0.340364	0.321172	0.675942	0.0147063	0.235836	-0.0544014	-0.141058	35375753	no	deepskyblue4
Hypocreales	FBUHA	0.539121	-0.707999	-0.0958967	0.811195	-0.803878	-0.571038	-0.318123	-0.24771	0.0227843	-0.155365	0.0200964	35197211	no	deepskyblue4
Hypocreales	FBULB	1.41563	-0.935408	-0.603929	0.306316	-0.619034	-0.0752328	0.165991	-0.146566	-0.0223414	-0.00416479	0.121117	42089104	no	deepskyblue4
Hypocreales	FBURG	1.51516	-0.936493	-1.11675	0.375801	-0.102906	0.428184	0.228848	-0.368535	0.0340948	-0.103422	0.045117	46782704	no	deepskyblue4
Hypocreales	FBUXI	0.130404	-1.0238	0.609178	0.313898	-0.656753	-0.119903	-0.45224	0.127363	-0.0998344	-0.0794043	-0.0533859	34444927	no	deepskyblue4
Hypocreales	FCAAT	0.545915	-1.1245	-0.842763	0.693631	-0.285061	-0.439984	0.125115	-0.0787463	-0.209636	-0.0907936	0.176525	37206586	no	deepskyblue4
Hypocreales	FCAMP	0.811537	-0.950197	-0.474186	0.952553	0.0290987	-0.783387	0.188586	0.000638842	-0.0445586	-0.0348484	0.134532	36598594	no	deepskyblue4
Hypocreales	BPSEU	-1.17424	-0.235076	0.570542	0.7168	-0.0638578	0.515633	-0.282563	-0.371252	0.298908	-0.190538	-0.0494173	34338593	no	deepskyblue4
Hypocreales	FcfAYWE	1.18603	-0.559752	-0.75405	0.960791	0.427964	-0.96776	0.308898	-0.0168595	-0.14929	0.0647675	0.0452173	39832230	no	deepskyblue4
Hypocreales	FcfFALC	2.61618	-0.630116	-1.43242	-0.291654	-0.0907836	0.743009	0.59142	0.453539	0.391688	0.0638611	0.0657541	57649506	no	deepskyblue4
Hypocreales	FcfHOST	2.22258	-0.504759	-1.74796	0.164755	-0.223323	0.30172	0.548089	-0.108913	-0.00857816	-0.0327771	0.0410523	52934854	no	deepskyblue4
Hypocreales	FcfVERT	1.49802	-1.01917	-0.507827	0.742382	0.409127	-0.0287557	0.449985	-0.0514299	-0.105675	0.0993866	0.132961	42533113	no	deepskyblue4
Hypocreales	FCHLA	0.763446	-0.798992	-0.508728	0.870416	0.0276407	-0.686874	0.00933351	-0.130181	-0.0343585	-0.00569898	0.030823	37699088	no	deepskyblue4
Hypocreales	FCIRC	2.07077	-0.449755	0.183059	0.902092	0.300934	0.193891	0.487329	-0.091702	-0.0419136	0.0776351	0.181573	43757604	no	deepskyblue4
Hypocreales	FCITR	0.916291	-0.992816	-0.428003	0.835288	0.194049	-0.636214	0.334412	-0.0359628	-0.0759915	-0.0201212	0.166981	37598080	no	deepskyblue4
Hypocreales	FCLAV	0.808483	-1.03535	-0.918872	0.633527	-0.104671	-0.731543	0.230143	-0.00970658	-0.15758	-0.0572467	0.170154	38139803	no	deepskyblue4
Hypocreales	FCOFF	0.625102	-1.06712	-0.493888	1.06312	0.438412	-0.479577	0.391691	-0.00304364	-0.077463	-0.0458843	0.12702	37393872	no	deepskyblue4
Hypocreales	FCOIC	1.3975	-0.904252	-0.657095	0.320626	-0.46873	-0.144232	0.16879	-0.0620505	-0.109353	0.0271683	0.148354	41946806	no	deepskyblue4
Hypocreales	FCOMM	1.76302	-0.694386	-0.788656	0.575911	0.232879	0.245297	0.200221	-0.226327	0.0569296	0.0634659	0.100138	46177511	no	deepskyblue4
Hypocreales	FCONCE	1.58347	-1.07146	-0.732572	0.347922	-0.398948	-0.0168392	0.116874	-0.154856	-0.0247388	0.114588	0.129164	42808118	no	deepskyblue4
Hypocreales	CMONT	-2.36747	0.282235	1.47967	-0.289568	0.234328	-0.215849	-0.216871	-0.815347	-0.025542	-0.25347	0.0746266	27232537	no	deepskyblue4
Hypocreales	FCONT	0.595284	-0.876654	0.0126129	0.871277	-0.252834	-0.348193	-0.161745	-0.056856	-0.059815	-0.139022	-0.0908567	37003545	no	deepskyblue4
Hypocreales	FCORT	0.859198	-0.858257	-0.302321	1.11561	0.218807	-0.626615	0.2405	-0.0651535	0.0113213	0.106804	0.0933387	37035658	no	deepskyblue4
Hypocreales	FCULM	0.916885	-0.489972	-0.436293	1.12401	0.0995451	-0.81193	0.25863	0.0285577	0.0235134	0.0794695	0.115591	37658711	no	deepskyblue4
Hypocreales	FCYAN	0.158825	-1.0862	0.362545	0.208816	-0.814068	0.430088	-0.61376	0.058582	0.113669	-0.225963	-0.0486201	37375191	no	deepskyblue4
Hypocreales	FDECE	1.96753	-1.92398	-0.787753	-0.367086	-0.114097	1.60673	0.0937638	0.139652	0.29298	-0.0660024	0.131359	51180657	no	deepskyblue4
Hypocreales	FDENT	1.61503	-1.01984	-0.678025	0.380036	-0.386796	-0.119705	0.165375	-0.142287	-0.04971	0.0515312	0.128278	42567036	no	deepskyblue4
Hypocreales	FDIME	0.484146	-0.635294	0.269071	1.03682	-0.261237	-0.286015	-0.0702743	-0.17243	0.143916	0.0103192	-0.0903925	36347000	no	deepskyblue4
Hypocreales	FDLAM	1.66412	-0.696043	-0.871185	0.131031	-0.95375	-0.11381	-0.0472957	-0.227714	0.0233146	0.192904	0.0729866	43847256	no	deepskyblue4
Hypocreales	ATAKE	-3.92811	3.67101	-0.277484	0.910738	-0.330989	1.56354	2.91126	0.537064	-0.265015	-0.238322	-0.151354	49594594	no	deepskyblue4
Hypocreales	ACHRY	-1.58486	-0.827954	1.6967	0.160345	-0.435718	-0.0907423	-0.413619	0.589906	0.278557	-0.0326972	-0.208852	28323031	no	deepskyblue4
Hypocreales	FEUWA	1.97523	-1.28736	-0.697567	-0.250333	-0.261918	0.425102	0.150471	0.359663	0.235897	0.267511	0.096877	47928877	no	deepskyblue4
Hypocreales	FFALC	1.61134	-1.64	-0.629207	-0.271617	-0.463699	0.53508	0.0858233	0.463344	0.0314016	-0.0574325	0.129218	45739506	no	deepskyblue4
Hypocreales	TKONII	-0.830894	-0.330575	1.29967	0.311064	0.654322	-0.43363	-0.286114	0.33716	0.276008	0.0987204	-0.0956971	32316263	no	deepskyblue4
Hypocreales	HPERN	0.0223875	2.22608	-0.872036	0.818142	-0.451286	-0.50542	-0.158924	0.197102	0.118054	0.509089	0.0438217	44006492	no	deepskyblue4
Hypocreales	HROSE	-0.166425	-0.0423893	-0.0398401	0.814683	0.488052	-0.0117552	-0.0297092	-0.133843	0.0787525	0.300371	-0.061064	38475127	no	deepskyblue4
Hypocreales	FNODO	0.649348	-0.77846	-0.279767	1.06014	0.00486873	-0.862665	0.145652	-0.0305264	-0.0089608	0.0160225	0.0870212	35496565	no	deepskyblue4
Hypocreales	CCICA	-2.14427	-0.316105	0.181352	-0.259475	-0.183325	0.721348	-0.109598	0.00976595	-0.193298	-0.27595	0.118527	33778479	no	deepskyblue4
Hypocreales	FGADI	1.22045	-1.00348	-0.589393	0.528004	-0.186567	-0.064274	0.132714	-0.183378	-0.0178093	0.0688808	0.083854	41388050	no	deepskyblue4
Hypocreales	FGERL	0.7592	-0.890919	-0.257955	1.20008	0.338057	-0.603456	0.316621	0.0327619	-0.019887	0.0791553	0.11601	36573545	no	deepskyblue4
Hypocreales	CJAVA	-2.11786	-0.858481	0.06632	0.021258	0.321547	1.02892	-0.355923	0.0420468	0.0472884	-0.123586	0.0166259	34849563	no	deepskyblue4
Hypocreales	CMILI	-1.70164	-0.250483	0.209393	0.461278	-0.648345	0.347962	-0.418371	0.368516	0.186781	-0.177963	0.0764395	32268578	no	deepskyblue4
Hypocreales	CPRUI	-2.13036	-0.756118	-0.0974952	-0.428549	-0.858273	0.988436	-0.113604	0.547676	-0.455517	-0.357662	-0.0254452	34020994	no	deepskyblue4
Hypocreales	CTENU	-2.15396	-0.523554	0.507898	-0.0140326	-0.221094	0.276505	-0.354557	0.133906	0.100503	-0.206796	0.0609081	30531522	no	deepskyblue4
Hypocreales	FGUTT	1.44377	-1.07418	-0.745413	0.362922	-0.55102	0.0473467	0.0976841	-0.164835	-0.111262	0.0429764	0.152034	42150411	no	deepskyblue4
Hypocreales	BBASS	-1.68932	-0.686826	0.114441	0.239712	-0.254121	0.614989	-0.530659	-0.183024	0.0937708	-0.192053	-0.00489544	33575620	no	deepskyblue4
Hypocreales	FHETE	0.65846	-0.987759	-0.438409	0.925795	-0.224728	-0.887456	-0.0633973	-0.106396	-0.136041	0.0576573	0.0238313	35294876	no	deepskyblue4
Hypocreales	FCERE	0.022762	-1.30713	-1.19952	0.931398	-0.212046	-0.0832714	0.177037	-0.101754	-0.783233	-0.592819	0.42714	35065869	no	deepskyblue4
Hypocreales	FHUMU	1.00786	-1.0369	-0.636772	0.794641	0.166887	-0.645718	0.307489	0.0216259	-0.0528704	-0.0399473	0.155029	38621348	no	deepskyblue4
Hypocreales	BRUDR	-1.93978	-0.750058	-0.303605	0.351821	-0.499035	0.757127	-0.175631	-0.120577	-0.132638	-0.321443	-0.0863035	34176631	no	deepskyblue4
Hypocreales	LFUNG	-0.363525	-1.06441	-0.866676	-0.176559	0.161628	1.31308	-0.228715	-0.598296	-0.176343	-0.0979238	-0.053092	43886902	no	deepskyblue4
Hypocreales	FIRRE	0.713482	-1.11218	-0.772449	0.770665	-0.0229205	-0.718258	0.240738	-0.00743691	-0.0992439	-0.0607827	0.158517	37237671	no	deepskyblue4
Hypocreales	FKURO	1.60044	-1.25994	-0.774799	-0.254051	-0.662025	0.268222	0.107166	0.377465	0.0123332	0.1837	0.0952734	45615198	no	deepskyblue4
Hypocreales	CHUBE	1.85775	-1.14905	-0.157348	-0.174011	-0.130723	0.532233	-0.189483	0.20189	0.309119	0.248	-0.239071	48190718	no	deepskyblue4
Hypocreales	FLANG	0.835512	-0.392115	-2.57173	-1.13194	-0.219831	0.892094	1.24342	0.213845	1.43878	0.380846	0.337759	59427938	no	deepskyblue4
Hypocreales	FLATE	1.93361	-1.09501	-0.729947	0.367724	-0.0961591	0.0814016	0.200846	-0.0445653	0.07863	0.139583	0.0412813	45539924	no	deepskyblue4
Hypocreales	DMACR	2.2879	-0.606144	-0.578403	-0.310806	0.118806	1.13586	0.0496129	0.0302863	0.666972	0.0722781	-0.31035	56855101	no	deepskyblue4
Hypocreales	DTORR	2.66874	-0.919834	-1.28131	-0.870381	0.165929	1.72362	0.119956	-0.0811075	0.707127	-0.133286	-0.280129	63030325	no	deepskyblue4
Hypocreales	FLUFF	0.687304	-1.11747	-0.717	0.792367	-0.0611531	-0.704182	0.251258	-0.0246188	-0.106097	-0.0841423	0.149514	36987806	no	deepskyblue4
Hypocreales	FMANG	1.70597	-0.901974	-0.935898	0.49283	-0.0261046	0.323802	0.235579	-0.239879	0.0488365	0.124127	0.0889048	46050792	no	deepskyblue4
Hypocreales	FMERI	0.848567	-0.872721	-0.27771	1.12774	0.213986	-0.633947	0.210638	-0.11065	0.0245633	0.0907097	0.0768798	36895363	no	deepskyblue4
Hypocreales	FMERIxA	0.729812	-1.03461	-0.244404	1.13702	0.230852	-0.653323	0.269475	-0.038055	-0.0642464	0.0434539	0.103382	35868949	no	deepskyblue4
Hypocreales	FMESO	0.861568	-0.807461	-0.186705	1.1035	0.139676	-0.718042	0.193224	-0.0685233	0.0850684	0.075554	0.0766715	36616586	no	deepskyblue4
Hypocreales	FMETA	2.34103	-1.24108	-0.12504	-0.0998692	-0.0485242	0.217132	0.219673	0.471737	0.345231	0.148019	0.156967	46858123	no	deepskyblue4
Hypocreales	FMEXI	1.5441	-1.0813	-0.807121	0.330018	-0.324534	0.0696134	0.216892	-0.157953	-0.0453715	0.112422	0.130314	43424706	no	deepskyblue4
Hypocreales	FMISC	1.13581	-1.11807	-0.770981	0.44447	-0.431727	-0.172429	0.067063	-0.0647289	-0.103332	0.156243	0.0896721	40646049	no	deepskyblue4
Hypocreales	FMUND	1.68855	-1.09931	-1.1871	0.0812732	-0.241766	0.476726	0.232708	-0.237578	0.052385	0.0542698	0.0913574	47562102	no	deepskyblue4
Hypocreales	MRILE	-1.50585	0.21222	0.851763	0.694561	0.0248552	0.252119	-0.539664	-0.509034	0.0617845	-0.0591623	-0.111084	31981709	no	deepskyblue4
Hypocreales	MROBE	-0.497432	-0.13963	-0.243818	0.241109	0.509398	0.926086	-0.739006	-1.05614	0.0546834	-0.158355	-0.139746	41620851	no	deepskyblue4
Hypocreales	TGAMS	-0.190953	-0.161681	0.203612	0.481253	0.434631	-0.0297422	-0.1052	-0.415095	0.0880068	0.00510905	-0.0324912	37833790	no	deepskyblue4
Hypocreales	MLIBE	-2.24017	-0.248785	1.02124	-0.408092	0.162562	0.309895	-0.944408	-0.414303	0.143844	-0.176254	-0.0797945	30871875	no	deepskyblue4
Hypocreales	THAMA	-0.138916	0.0129595	-0.144406	0.337262	-0.0965438	-0.243507	-0.329973	-0.499517	0.0446568	-0.0372746	-0.0664071	38135536	no	deepskyblue4
Hypocreales	THARZ	0.197915	0.118871	0.0719047	0.644206	0.0421015	0.268368	0.0912029	-0.365032	0.0685021	0.101135	-0.0801207	40875007	no	deepskyblue4
Hypocreales	FSUCC	1.71215	-0.741438	-0.875429	0.24743	-0.632512	-0.0283806	0.103606	-0.207305	0.0730671	0.11085	0.0774541	44758654	no	deepskyblue4
Hypocreales	NCOCC	0.521591	-1.16099	0.825398	-0.0455812	-0.799284	0.413676	-0.366561	0.400203	0.0695993	-0.130128	-0.0714372	38216159	no	deepskyblue4
Hypocreales	FNISI	0.999197	-1.28268	-0.577952	0.680472	0.0319542	0.0116083	0.186654	-0.0509386	-0.12544	0.0850736	0.0836811	40221141	no	deepskyblue4
Hypocreales	FBACT	1.35289	-0.889234	-0.4611	0.394683	-0.643403	-0.0887793	0.0322443	-0.246459	-0.0177113	-0.112405	0.123088	41097837	no	deepskyblue4
Hypocreales	NHEDE	0.621189	-0.0321785	0.402732	0.657402	-0.221416	0.395768	0.00704806	0.27454	0.3105	0.0319988	-0.21489	43190094	no	deepskyblue4
Hypocreales	NPUNI	0.816137	-0.817783	0.695855	-0.110739	-0.76869	0.292274	-0.34509	0.296107	0.188809	-0.148269	-0.0799882	40304263	no	deepskyblue4
Hypocreales	TPARAR	-1.21902	-0.531122	0.895106	-0.179685	-0.0312506	-0.468718	-0.251324	0.129027	0.0197594	0.0497459	-0.119966	31514731	no	deepskyblue4
Hypocreales	TPLEU	0.297164	0.213131	0.393319	-0.00799054	-1.24541	-0.422344	-0.180864	-0.110294	-0.250358	-0.0960413	-0.0247516	36715619	no	deepskyblue4
Hypocreales	EAMAR	-2.60022	2.45397	0.404853	1.29166	-1.15273	0.530734	1.50644	0.600655	0.128891	-0.139154	-0.154154	36730528	no	deepskyblue4
Hypocreales	FPENZ	0.649502	-0.57406	0.412541	1.03972	-0.34476	-0.431283	-0.0272925	-0.0648946	0.0746562	0.0520411	-0.0473557	35680009	no	deepskyblue4
Hypocreales	FPHAS	1.8406	-1.44005	-0.507583	-0.182131	-0.566707	0.294132	0.0540718	0.383625	0.1907	0.17722	0.111275	45295359	no	deepskyblue4
Hypocreales	FPHYL	1.49941	-1.03971	-0.631445	0.447339	-0.407566	0.0694719	0.187329	-0.200472	-0.0669799	0.0775663	0.104488	42534621	no	deepskyblue4
Hypocreales	FPINI	1.57644	-0.188981	-1.13989	0.720548	-0.175677	0.346055	0.538858	-0.0227342	-0.00950002	0.281827	0.137154	47757963	no	deepskyblue4
Hypocreales	FPOAE	0.897871	-0.360875	-1.32941	0.713515	0.327169	0.052416	0.488329	-0.200878	0.281573	0.12407	0.0831294	45862664	no	deepskyblue4
Hypocreales	FHOST	1.74349	-0.336286	-1.42676	0.432714	-0.169149	0.525204	0.561441	-0.32568	0.127107	-0.138174	-0.125324	52161482	no	deepskyblue4
Hypocreales	CaffHUMI	-1.91303	0.254102	1.30372	-0.390108	0.350207	0.211335	-0.277062	-0.804933	-0.288123	-0.279809	0.10154	30632022	no	deepskyblue4
Hypocreales	EGLYC	-2.48617	2.38729	0.54975	1.32639	-0.753695	0.720396	1.60776	0.691951	0.178524	-0.0970769	-0.348248	40194076	no	deepskyblue4
Hypocreales	EINEB	-2.32428	0.687923	1.00131	1.08546	-0.392678	0.3528	0.555148	-0.214506	-0.164571	-0.414148	0.0132205	28004062	no	deepskyblue4
Hypocreales	ESYLV	-3.27302	0.569261	0.83724	0.907843	-0.444526	0.777166	1.10769	0.721523	-0.219294	-0.179993	-0.192406	24202633	no	deepskyblue4
Hypocreales	ETYPH	-2.65441	2.38862	0.212256	1.72724	-0.572493	0.884092	1.73282	0.259125	0.0142606	-0.016747	-0.160611	37849601	no	deepskyblue4
Hypocreales	EWEBE	-2.74235	0.177127	1.41438	-1.01267	0.926694	-0.85615	0.29515	0.810081	0.113214	0.0533129	0.131737	27378841	no	deepskyblue4
Hypocreales	FRAMI	1.54909	-1.12927	-0.960107	0.205999	-0.321725	0.273847	0.233667	-0.14395	-0.018628	0.0232813	0.142134	44957504	no	deepskyblue4
Hypocreales	FREDO	2.12163	-0.192755	-1.52895	0.208938	-0.0674883	0.429837	0.286429	-0.196776	0.204473	0.184527	0.0689265	52757314	no	deepskyblue4
Hypocreales	FRUSC	-0.14132	-1.14561	0.63777	0.401222	-0.553413	-0.492341	-0.389563	0.27553	-0.12189	-0.106113	-0.107239	32360813	no	deepskyblue4
Hypocreales	FSACC	1.41275	-0.13315	-0.950478	0.797412	-0.0548546	0.105779	0.481245	0.0362237	-0.0404661	0.18721	0.155619	45739938	no	deepskyblue4
Hypocreales	FACAC	0.855239	-0.880354	-0.339057	1.10233	0.15294	-0.657042	0.153616	-0.106824	0.0115933	0.0818979	0.0743923	36922138	no	deepskyblue4
Hypocreales	FACUM	1.07897	-1.27719	-1.17938	0.393003	0.116719	0.347105	0.195583	-0.326924	-0.229312	-0.220438	0.0683897	44185724	no	deepskyblue4
Hypocreales	FACUT	1.63183	-0.941708	-0.556686	0.451861	-0.321003	-0.0715342	0.144932	-0.197251	-0.0464009	0.066959	0.100541	42602521	no	deepskyblue4
Hypocreales	FAETH	0.881348	-0.8706	-0.298936	1.12157	0.16112	-0.719665	0.154334	-0.0885849	0.0384716	0.0936177	0.0643352	36768060	no	deepskyblue4
Hypocreales	FAGAP	1.46249	-0.720806	-0.401322	0.480291	-0.512222	-0.230856	0.186901	-0.22225	-0.210419	-0.0166304	0.0921485	41033174	no	deepskyblue4
Hypocreales	FALBI	-0.490123	-2.00544	-0.0623867	-0.186418	-0.696731	0.592216	-0.131429	0.825585	-0.75152	-0.367164	0.183035	34719419	no	deepskyblue4
Hypocreales	FALBO	1.56898	-1.54125	-0.467533	-0.345423	-0.66846	1.01764	-0.103468	0.104246	0.225202	-0.18818	0.0538477	47195705	no	deepskyblue4
Hypocreales	FALGE	1.7104	-0.911873	-1.2831	0.189998	-0.261908	0.348374	0.251944	-0.370676	-0.0318079	-0.0594881	0.0478436	47749548	no	deepskyblue4
Hypocreales	FAMBR	1.96429	-1.30878	-0.667882	-0.211253	-0.450677	0.613125	0.0758994	0.274187	0.276619	0.0932825	0.0877443	48209443	no	deepskyblue4
Hypocreales	CSPAR	-2.25174	0.169261	1.24514	-0.217226	0.250058	0.100798	-0.226642	-0.753801	-0.289305	-0.322954	0.0734632	28785142	no	deepskyblue4
Hypocreales	FANTH	1.6116	-0.953854	-1.03595	0.119092	-0.586315	0.182028	0.123687	-0.134993	-0.0892329	0.0988982	0.139351	45018661	no	deepskyblue4
Hypocreales	FARME	0.729952	-0.889964	-0.470937	0.935447	0.0243974	-0.659707	0.126728	-0.121839	-0.0559709	0.0174494	0.0877829	36931162	no	deepskyblue4
Hypocreales	FSUBG	1.59995	-0.727736	-0.806685	0.334099	-0.695446	-0.076121	0.141818	-0.160497	-0.0268263	0.133671	0.0660785	43733627	no	deepskyblue4
Hypocreales	FSUBL	0.72954	-1.03317	0.477216	1.11747	0.0760181	-0.281788	0.0197414	-0.101623	-0.0516347	-0.0272887	0.0108553	35211940	no	deepskyblue4
Hypocreales	FSUBT	0.462587	-1.06461	-0.380871	1.0888	-0.197691	-0.760803	0.0026728	-0.0779876	-0.0102887	-0.0686993	0.0490135	34707608	no	deepskyblue4
Hypocreales	SAOGA	-0.990635	-0.936897	0.706843	1.27042	-0.772699	0.495597	-0.57309	-0.585742	0.0390014	-0.0702217	0.0189606	29244327	no	deepskyblue4
Hypocreales	FAYWE	0.480947	-0.771598	-0.263248	1.10984	0.0930826	-0.825798	0.0501973	-0.147897	-0.0334027	-0.0984449	0.0183432	35346932	no	deepskyblue4
Hypocreales	FTEMP	1.47313	-0.474408	-0.805917	0.767964	0.127691	0.269078	0.370248	-0.038389	0.0124774	0.160191	0.138956	45455952	no	deepskyblue4
Hypocreales	NDITI	1.0045	-0.41467	0.414686	0.334837	0.0161761	0.62623	-0.150174	0.39554	0.378214	0.144632	-0.141946	44940381	no	deepskyblue4
Hypocreales	FTJAE	1.52526	-1.14952	-0.580463	0.471246	-0.148432	0.080553	0.238597	-0.10529	-0.0278377	0.148062	0.122515	42594898	no	deepskyblue4
Hypocreales	FTORR	0.777254	-0.945692	0.289352	0.91918	0.104151	-0.769543	-0.0776958	0.0660362	-0.01405	-0.123293	-0.0393393	35495622	no	deepskyblue4
Hypocreales	FTORU	1.05678	-0.969855	-0.695379	0.717761	0.105723	-0.457875	0.187354	-0.133598	-0.147195	0.0102618	0.0166728	40179963	no	deepskyblue4
Hypocreales	FTRAN	0.720894	-0.903282	-0.508686	1.01648	0.110753	-0.725482	0.199955	-0.0970873	-0.122326	0.0177475	0.0405443	36963537	no	deepskyblue4
Hypocreales	FBREV	1.22216	-1.16477	-0.690635	0.485878	-0.425257	-0.0568128	0.133341	-0.0839626	-0.115082	0.065586	0.116209	40890785	no	deepskyblue4
Hypocreales	FTUAR	1.47121	-1.44995	-0.74329	-0.159024	-0.749521	0.787179	0.12014	0.322923	0.117233	-0.00314861	0.141684	46206178	no	deepskyblue4
Hypocreales	FTUPI	1.50667	-1.19095	-0.92734	0.307834	-0.372632	0.318798	0.101729	-0.206819	0.00445432	0.00315918	0.126333	44301952	no	deepskyblue4
Hypocreales	FUDUM	1.4968	-1.26696	-0.86968	0.345156	-0.407962	0.0213458	0.0350214	-0.457242	-0.122104	-0.0743853	0.0321347	42618365	no	deepskyblue4
Hypocreales	FUSSU	0.711198	-0.992952	-0.150734	1.21398	0.418324	-0.646057	0.228628	-0.0296082	0.00788009	0.0734122	0.0846061	35881696	no	deepskyblue4
Hypocreales	FVANE	2.11487	-1.24146	-0.745271	-0.1472	0.0851943	0.622573	0.286309	0.350427	0.365126	0.148708	0.0297953	50628440	no	deepskyblue4
Hypocreales	FVENE	1.06014	-0.460701	-0.494504	0.961642	-0.138636	-0.787687	0.248837	0.10099	-0.0317184	0.0319798	0.105638	38650641	no	deepskyblue4
Hypocreales	FVENT	-0.0708769	-0.260121	0.206159	0.0484255	-0.857159	-0.835906	-0.0935059	0.439623	0.0488513	-0.0118258	-0.103063	35601758	no	deepskyblue4
Hypocreales	FVERR	0.318738	-0.962537	-0.132241	1.16658	-0.138047	-0.613988	0.0683089	-0.0341094	-0.0839453	0.00127756	0.0702979	33878387	no	deepskyblue4
Hypocreales	FVERT	1.59284	-0.748573	-0.608091	0.408194	-0.376403	-0.324041	0.158339	-0.0562545	-0.105728	0.142846	0.155274	41885085	no	deepskyblue4
Hypocreales	FVIRG	1.36855	-0.3975	-0.787492	0.194951	-0.56228	0.230814	0.742115	0.840439	0.105823	-0.160114	0.00793679	49277595	no	deepskyblue4
Hypocreales	FVORO	0.741662	-0.984734	-0.0995622	1.23106	0.403058	-0.641874	0.219401	-0.00980068	0.0534458	0.0720523	0.0786605	35925903	no	deepskyblue4
Hypocreales	FXYLA	1.71086	1.09055	-1.47983	0.957372	-0.235102	0.693829	0.610844	0.206036	0.115674	0.122269	0.198057	54888865	no	deepskyblue4
Hypocreales	FXYRO	0.878718	-0.441564	0.535573	0.828466	-0.412472	-0.357237	0.132551	-0.223802	-0.200451	-0.573748	0.0154708	36799915	no	deepskyblue4
Hypocreales	FZANT	0.815952	-0.902523	-0.198688	0.659556	-0.436414	-0.221302	-0.249749	-0.146252	0.083409	-0.182434	-0.147377	39448205	no	deepskyblue4
Hypocreales	FZEAL	-0.11598	-1.25678	0.573722	0.579998	-0.431618	-0.362939	-0.49403	0.329232	0.0105503	-0.248478	-0.0479909	32567272	no	deepskyblue4
Hypocreales	FLONG	0.792568	-0.860303	-0.22005	1.16437	0.290699	-1.03383	0.296367	0.000250478	-0.0347273	0.0782202	0.0922113	35199547	no	deepskyblue4
Hypocreales	GFLAV	-1.25579	-0.0640988	1.10358	0.457675	-0.237895	-0.502183	0.223069	0.488563	0.283462	-0.068241	0.0821992	29471268	no	deepskyblue4
Hypocreales	GMORB	-2.5324	0.0476107	1.39267	0.121299	0.405366	-0.235818	0.1586	0.414612	0.213724	-0.0705541	0.108979	26539379	no	deepskyblue4
Hypocreales	GPUTT	-1.61417	-0.674268	1.26039	-0.174383	0.0748601	-0.262547	-0.125026	0.746732	0.302925	0.0279717	-0.0200566	30019402	no	deepskyblue4
Hypocreales	FCONCO	1.34245	-1.24341	-1.26923	0.24956	0.133573	0.551117	0.342324	-0.317735	0.0726582	-0.13578	0.0885283	47027264	no	deepskyblue4
Hypocreales	GTUMU	-0.839047	-1.49829	0.149943	-0.585718	-0.121867	1.65404	-0.19416	0.393955	0.587508	0.196761	-0.037231	42257282	no	deepskyblue4
Hypocreales	SBRAC	-0.499532	-0.490318	1.24063	0.29913	-0.789766	-0.098812	-0.65447	-0.1676	0.323602	0.106838	-0.119967	31862451	no	deepskyblue4
Hypocreales	SORYZ	-0.721663	-0.852586	1.47447	0.416516	-0.0386366	0.358844	-0.476045	0.0791705	0.291848	0.0778651	-0.104965	32323254	no	deepskyblue4
Hypocreales	SSTRI	0.0649847	-0.638756	1.19802	0.631625	-0.487627	0.116948	-0.376698	-0.0799551	0.213094	0.252636	-0.0973609	33830638	no	deepskyblue4
Hypocreales	MBRUN	-0.722737	-0.461381	0.161713	-0.222193	-0.244659	0.357672	-0.870597	-0.535876	-0.0926485	-0.117134	-0.107813	36953167	no	deepskyblue4
Hypocreales	MGUIZ	-0.835978	-0.322383	-0.320723	-0.0650408	0.34948	1.16395	-0.394264	-0.620616	0.0232648	-0.0985345	-0.158595	42748070	no	deepskyblue4
Hypocreales	HMINN	-0.849801	0.00747618	-0.880557	-0.942123	-0.1776	1.41479	-0.611501	-0.434579	0.521588	-0.0816067	-0.338734	49847988	no	deepskyblue4
Hypocreales	HRHOS	-1.39745	0.921598	-0.0289528	0.339413	-0.196421	1.36975	0.646809	-0.118309	0.453777	-0.181407	-0.644945	49351876	no	deepskyblue4
Hypocreales	FDOME	0.039783	-0.518385	0.54387	1.16838	-0.690386	-1.11144	-0.0760177	-0.0836368	0.03625	-0.177827	-0.169353	31013257	no	deepskyblue4
Hypocreales	FEQUI	1.16532	-0.745479	-0.70512	0.725203	0.283736	-0.500825	0.299029	-0.0410253	-0.0598644	0.0377659	0.140847	40776005	no	deepskyblue4
Hypocreales	HSIAM	-3.14365	-0.639084	0.604075	-0.518277	-0.52912	0.545446	-0.266323	-0.481179	-0.257469	-0.241536	0.0101409	27629534	no	deepskyblue4
Hypocreales	FHAIN	0.57856	-1.0629	-0.580282	0.895385	0.186575	-0.753172	0.337211	0.0519829	-0.166041	-0.0748149	0.162525	36248601	no	deepskyblue4
Hypocreales	TRUBI	0.409082	0.0333079	-0.507021	-0.0101231	-1.07395	-0.0485531	0.182853	0.963634	0.183788	0.0909287	-0.0716352	44365359	no	deepskyblue4
Hypocreales	TKONIO	-0.120846	-0.0886189	0.161793	0.511831	0.0287778	-0.29635	-0.21217	-0.403	0.0748662	0.054345	-0.0350537	36554926	no	deepskyblue4
Hypocreales	EGANS	-2.56731	2.22259	0.298812	1.29643	-0.436693	0.803053	1.31811	0.427828	0.0688129	-0.128393	-0.118248	38350484	no	deepskyblue4
Hypocreales	NGALL	0.525512	-1.43751	0.746875	-0.0138007	-0.545739	0.648251	-0.248811	0.470668	0.133782	-0.0760355	-0.0967567	39384845	no	deepskyblue4
Hypocreales	FFUJI	1.33386	-0.681076	-0.503192	0.871045	0.338	0.366521	0.343329	-0.104815	-0.0136479	0.195384	0.115556	43832314	no	deepskyblue4
Hypocreales	TOLIG	-1.31284	0.906504	0.204293	1.00921	0.347854	-0.062078	0.260462	-0.914208	-0.28498	0.0496275	0.0938744	32991848	no	deepskyblue4
Hypocreales	FPSEUG	0.782229	-0.668063	-0.442166	1.08832	0.0293767	-0.794455	0.276113	0.0432145	0.00289673	0.0840055	0.0992329	36907193	no	deepskyblue4
Hypocreales	FGLOB	1.52449	-1.18597	-0.657287	0.437451	-0.0731872	0.221147	0.280645	-0.12671	-0.0747913	0.064886	0.136716	43390654	no	deepskyblue4
Hypocreales	FGOOL	0.542241	-0.788557	-0.137722	1.10827	-0.276965	-0.938037	0.152923	-0.065005	-0.131448	-0.169271	0.0691025	34037900	no	deepskyblue4
Hypocreales	FGRAME	0.960083	-0.7543	-0.386428	0.987677	0.0108991	-0.949141	0.221854	-0.0687708	-0.0310033	0.0704937	0.1116	36565771	no	deepskyblue4
Hypocreales	FGRAMU	0.666665	-0.944953	-0.225066	0.964379	-0.183614	-1.02337	0.106239	0.0161072	-0.0917304	0.0764684	0.0316722	34577661	no	deepskyblue4
Hypocreales	SNORV	-0.173408	-0.123178	0.999734	1.06163	-0.33861	0.13966	-0.109497	0.088811	0.0520805	-0.0241573	-0.110531	34600830	no	deepskyblue4
Hypocreales	FSAMB	1.08315	-0.726954	-0.549667	0.924415	-0.369291	-0.826987	0.15643	-0.03996	-0.150349	0.0401173	0.153367	37120880	no	deepskyblue4
Hypocreales	FSARC	1.61569	-1.16024	-0.721504	0.359508	-0.0861969	0.256678	0.134347	-0.0773468	0.0131405	0.0635649	0.0416155	44855619	no	deepskyblue4
Hypocreales	CPROT	0.0321403	0.0787306	-0.13288	0.795841	0.341424	-0.216082	-0.0822711	-0.197761	0.162177	0.296339	-0.101484	39087229	no	deepskyblue4
Hypocreales	MECHI	0.549085	-0.437004	0.330799	0.477096	0.128208	0.749738	-0.166186	-0.0180802	0.532545	0.235774	-0.146821	43408566	no	deepskyblue4
Hypocreales	FILLU	0.200025	-1.32846	-0.570929	-0.169313	-1.10441	-0.00775625	-0.275649	0.682311	-0.221221	-0.325828	0.0974728	38387468	no	deepskyblue4
Hypocreales	FPSEUA	1.33499	-1.11258	-0.613921	0.512738	-0.370693	0.018273	0.225796	-0.0557428	-0.0983828	0.0757682	0.12204	41542112	no	deepskyblue4
Hypocreales	LPSAL	-1.37523	-1.23832	-0.372667	-0.0992462	-0.664	0.912935	-0.591288	0.12764	0.0140043	-0.232492	0.0538121	36055345	no	deepskyblue4
Hypocreales	FSORO	1.47156	-0.370007	-1.00626	0.906363	0.184633	0.591721	0.674967	0.00631676	-0.0201124	0.218908	0.145491	47712962	no	deepskyblue4
Hypocreales	FKYUS	0.751885	-0.855497	-0.402016	1.20291	0.0408551	-0.796166	0.218117	-0.0468914	-0.0630855	0.124439	0.075741	35882428	no	deepskyblue4
Hypocreales	TINFL	-1.16522	-1.24362	1.87013	-0.379734	-0.326487	0.559199	-0.556497	0.872187	0.244628	0.246638	-0.166243	31717789	no	deepskyblue4
Hypocreales	TOPHI	-1.02695	-0.972163	1.95664	-0.0223118	-0.144629	0.617234	-0.623924	0.283485	0.0844575	0.020149	-0.103872	31148930	no	deepskyblue4
Hypocreales	FSTIL	2.03569	-1.06705	-0.700717	0.330505	-0.144938	-0.00894705	0.191631	-0.0550005	0.151928	0.124351	0.058628	45539150	no	deepskyblue4
Hypocreales	FLOUI	0.761749	-0.874242	-0.225233	1.11671	0.207415	-0.686639	0.209267	-0.0564558	-0.0128256	0.079019	0.0872776	36222603	no	deepskyblue4
Hypocreales	PIPOM	0.245904	-0.208498	1.36376	0.130685	-0.739485	0.234053	-0.820349	-0.783757	-0.0984745	-0.477372	0.0501123	34487912	no	deepskyblue4
Hypocreales	TROSE	-1.75859	-0.0466543	0.418251	-0.105437	-1.05372	0.0165407	-0.527552	0.27752	0.509571	-0.103985	-0.084331	32853527	no	deepskyblue4
Hypocreales	TAFRO	0.0522647	-0.424829	0.211372	0.336674	-0.106481	-0.0103301	-0.209312	-0.376974	0.068039	0.036441	-0.0986878	37955682	no	deepskyblue4
Hypocreales	FTANA	0.731658	-1.10137	-0.758517	0.748074	-0.00902272	-0.771375	0.294886	-0.0135239	-0.132081	-0.0531468	0.141622	37263230	no	deepskyblue4
Hypocreales	MACRI	-0.482278	0.385783	0.502499	0.393045	0.382268	0.629146	-0.747596	-0.959398	0.0928992	-0.348886	-0.0959727	39218245	no	deepskyblue4
Hypocreales	MALBU	-1.84979	0.20322	0.581356	-0.500553	-1.12188	-0.282673	-0.78151	-0.292182	-0.0486406	-0.0102287	-0.0731574	30405176	no	deepskyblue4
Hypocreales	MANIS	-0.571736	0.590322	-2.46031	-2.28825	-3.40339	-0.942885	-1.34557	-0.561897	-0.166646	0.262117	-0.152869	42848098	no	deepskyblue4
Hypocreales	PCHLA	0.151097	-0.554684	0.179388	0.205196	0.475996	1.34557	-0.582188	-0.77999	0.306784	-0.0488351	-0.191033	44182543	no	deepskyblue4
Hypocreales	FSPOR	0.902863	-0.86756	-0.479489	0.929893	-0.027837	-0.751597	0.132013	-0.0376708	-0.0873574	0.0246198	0.0866832	37239629	no	deepskyblue4
Hypocreales	TCITR	-1.09653	-0.362109	0.903583	0.314188	0.565445	-0.137178	-0.0834514	0.266167	0.0929393	0.0853311	-0.0750972	33195261	no	deepskyblue4
Hypocreales	TERIN	-0.308147	0.0915242	0.0607841	0.467264	-0.0563437	-0.387248	-0.283948	-0.518963	-0.0277187	-0.0148897	-0.0171493	35898035	no	deepskyblue4
Hypocreales	TVIRE	-0.193118	-0.321082	0.203701	0.532149	0.613337	0.210348	-0.106214	-0.326196	0.138269	0.153495	-0.102707	38907387	no	deepskyblue4
Hypocreales	TGUIZ	0.113276	-0.449577	0.256464	0.382321	0.163189	0.0919931	-0.200036	-0.406285	0.135616	0.10934	-0.0568745	38328401	no	deepskyblue4
Hypocreales	TOVAL	-1.70597	-0.33439	0.358983	0.81918	-0.57921	0.256752	-0.0700689	-0.00720784	0.259935	-0.222669	-0.053128	31385125	no	deepskyblue4
Hypocreales	THEMI	-1.64752	-1.38496	0.385039	0.970782	-0.477638	0.688816	-0.349072	-0.333958	-0.116645	-0.228519	0.136761	28473934	no	deepskyblue4
Hypocreales	TSYMP	-1.63863	-0.022092	0.0885624	0.862731	-0.412371	0.319086	-0.121962	-0.00794523	0.274372	-0.171183	0.0480215	32917418	no	deepskyblue4
Hypocreales	PLILA	-1.11785	-1.46212	1.07085	-0.87012	0.189455	1.4244	-0.545945	0.790534	0.039628	0.00169701	-0.0712269	38366514	no	deepskyblue4
Hypocreales	EFEST	-2.16848	3.24147	0.359898	1.42384	0.305057	0.461729	-0.0724845	0.18497	0.303261	0.262636	0.425513	35023690	no	deepskyblue4
Hypocreales	FTHAP	1.37181	-0.750827	-0.595445	0.362122	-0.747365	-0.372428	-0.086412	-0.175545	-0.0719023	0.0478964	0.103571	40584380	no	deepskyblue4
Hypocreales	TLONG	-0.531168	-0.0620853	0.796697	-0.564407	-0.981183	-1.32236	-0.710758	0.315537	0.225863	0.0934106	-0.123653	31743061	no	deepskyblue4
Hypocreales	FPSEUC	1.50088	-1.11394	-0.772732	0.353143	-0.326155	0.0101402	0.165352	-0.133326	-0.127843	0.0925801	0.146477	42584033	no	deepskyblue4
Hypocreales	OCAMPF	-2.87768	1.83821	0.585569	0.954537	-0.14468	0.70912	-0.34114	0.600288	-0.00963187	0.378423	0.1634	30465672	no	deepskyblue4
Hypocreales	FPSEUN	1.12475	-1.18712	-0.722114	0.476316	-0.473163	0.0939686	0.0945258	-0.151369	-0.208274	-0.0856298	0.18429	40550951	no	deepskyblue4
Hypocreales	FPALU	0.80668	-0.910099	-0.320557	1.06243	0.188797	-0.761947	0.141747	-0.136672	-0.0376025	-0.044488	0.0548319	36575156	no	deepskyblue4
Hypocreales	OUNIL	-3.67332	-1.26027	0.94288	0.0209069	-0.574548	0.392547	-0.175249	0.64335	-0.256731	0.0813579	-0.193299	23018927	no	deepskyblue4
Hypocreales	TVIRI	-0.287723	-0.409665	0.40035	0.532297	0.602168	0.0588311	-0.227131	-0.321996	0.125488	0.105959	-0.080479	36970653	no	deepskyblue4
Hypocreales	TPARAD	-1.56011	-1.33495	2.10344	-0.333646	-0.589706	0.484044	-0.544565	0.817511	-0.192713	-0.0582465	-0.0256096	27330746	no	deepskyblue4
Hypocreales	PBUXI	-0.709388	-0.899953	1.58509	0.568242	-0.501468	-0.685769	-0.415569	0.732862	0.211803	0.0183632	-0.109557	27724195	no	deepskyblue4
Hypocreales	PFOLI	-0.874573	-0.621164	1.54181	0.40888	-0.308179	-0.703093	-0.532031	0.630014	0.261793	0.0247441	-0.125752	28445594	no	deepskyblue4
Hypocreales	FSCIR	0.94763	-0.987493	-0.793978	0.654966	0.0400656	-0.587383	0.293494	-0.037763	-0.0662972	-0.00257525	0.162788	39168826	no	deepskyblue4
Hypocreales	FSECO	1.0376	-1.08568	-1.52081	0.218174	-0.400521	0.886433	0.162125	-0.343543	-0.153424	-0.434414	0.0346386	47864686	no	deepskyblue4
Hypocreales	FPROT	1.47555	-1.58547	-0.393467	-0.266862	-0.389706	0.369682	0.148721	0.668779	0.17875	0.0737566	0.1565	44504392	no	deepskyblue4
Hypocreales	UVIRE	-2.38028	2.83056	0.647614	-0.322184	1.22354	0.417615	-0.806115	0.227094	0.256077	0.117316	0.299892	38804241	no	deepskyblue4
Hypocreales	FSOLA	2.59176	-0.0446997	0.436458	0.414193	-0.0687853	-0.201071	0.169734	0.324756	0.122953	0.0726628	0.142682	45813297	no	deepskyblue4
Hypocreales	TATROV	-0.188	-0.339046	0.515074	0.562832	0.549108	-0.208492	-0.146201	-0.312047	0.202161	0.0662896	-0.0570758	36143664	no	deepskyblue4
Hypocreales	TBREVO	-0.391533	-0.31438	0.237666	0.415876	0.0263174	-0.177983	-0.264227	-0.443876	0.0759004	0.0453852	-0.179076	36398442	no	deepskyblue4
Hypocreales	OSINE	-0.767762	10.3718	-3.43213	-0.708532	4.3211	2.57139	-7.11619	2.55437	1.0952	1.19344	0.879247	110880992	no	deepskyblue4
Hypocreales	FSTER	1.44933	-1.20006	-1.05367	0.241656	-0.381509	0.465298	0.131825	-0.155401	0.0104489	-0.0329583	0.160664	45121287	no	deepskyblue4
Hypocreales	IDEST	2.48025	-1.26047	-0.839209	-0.947391	-0.128309	1.50548	-0.195002	0.0117597	0.708793	0.0779381	-0.260478	57955314	no	deepskyblue4
Hypocreales	PRORI	1.20025	-1.17213	0.112891	-0.106994	-0.242858	0.435566	-0.322066	-0.121917	0.233549	0.104469	-0.21428	43776114	no	deepskyblue4
Hypocreales	HTHOM	-1.54256	-0.38241	0.599583	0.282077	-0.131159	0.567747	-0.719329	0.135066	0.0469897	-0.115835	-0.214367	34468220	no	deepskyblue4
Hypocreales	SCHLO	-0.378718	-0.770127	1.24741	0.298371	-0.669981	0.0595724	-0.798412	0.105748	0.303999	-0.10779	-0.201013	33231762	no	deepskyblue4
Hypocreales	TLIXI	0.161356	-0.461841	-0.052097	0.151006	-0.11823	0.137637	-0.190345	-0.471797	-0.0757792	-0.00022256	-0.106616	39755655	no	deepskyblue4
Hypocreales	OAUST	-2.93619	-0.790212	1.30905	0.472002	-0.376397	0.16249	-0.23322	-0.0770827	0.0428587	0.0827041	-0.0777381	23199192	no	deepskyblue4
Hypocreales	FSETO	1.15457	-1.48314	-0.231023	-0.253846	-0.830246	0.907641	-0.30423	0.189524	0.0644642	-0.0964422	0.091676	43692596	no	deepskyblue4
Hypocreales	FSIBI	0.668346	-1.14308	-0.686429	0.903269	0.221901	-0.322364	0.159671	-0.139702	0.0290418	-0.211497	0.0637244	38920446	no	deepskyblue4
Hypocreales	FTRIC	1.41475	-0.797882	-0.722095	0.678314	0.245794	-0.251814	0.265059	-0.0629457	-0.0196171	0.17496	0.0643775	42796142	no	deepskyblue4
Hypocreales	FSTAP	-0.00363175	-1.10807	0.881591	0.959697	-0.153352	-0.518018	-0.308951	0.129144	-0.00789951	-0.052865	-0.0991491	31326128	no	deepskyblue4
Hypocreales	IMORS	5.35512	2.61724	-2.08498	-2.98071	-6.06103	-2.5086	-1.3384	0.22564	0.287566	0.399479	-0.127861	60999726	no	deepskyblue4
Hypocreales	FANGU	0.811593	-0.767774	-0.741134	0.866801	-0.232747	-0.522681	0.22768	-0.145136	-0.0518098	0.0173226	0.125739	38446519	no	deepskyblue4
Hypocreales	PPENI	-0.929914	1.78959	-0.0541553	1.27064	0.710953	0.36977	-0.129045	-0.436734	0.188325	0.38999	0.0617427	39778378	no	deepskyblue4
Hypocreales	TASPE	-0.421737	0.301437	0.287711	0.923707	0.772579	-0.0809868	0.0594695	-0.432145	0.0966695	0.00923414	-0.035296	37264382	no	deepskyblue4
Hypocreales	TATROB	0.337523	-0.322748	0.383886	0.472529	0.195797	0.197017	-0.0946269	-0.343729	-0.000469571	0.031239	-0.00326633	38860492	no	deepskyblue4
Hypocreales	SCHAR	0.0958558	-0.18252	0.633914	0.607228	-0.329386	0.505369	-0.223934	-0.278162	0.440567	-0.0115445	-0.290055	40245309	no	deepskyblue4
Hypocreales	TLENT	0.103227	-0.567716	0.40361	0.550652	0.516945	0.195562	-0.130644	-0.36651	0.182243	0.11888	-0.0703857	38315448	no	deepskyblue4
Hypocreales	TCAPI	-2.58812	-1.59296	2.31289	-0.29789	-0.588016	0.207467	-0.453631	1.01716	-0.148232	0.0963651	-0.184074	22448936	no	deepskyblue4
Hypocreales	OPOLY	-2.85704	4.36871	-0.482696	0.89721	0.571337	1.11194	-0.429514	0.501153	0.149142	0.502857	0.484321	43245328	no	deepskyblue4
Hypocreales	XRECI	1.41744	-1.0504	1.0146	0.164395	-0.548448	0.644331	-0.261942	0.0982136	0.264282	0.356076	-0.0928984	41155911	no	deepskyblue4
Hypocreales	OCAMPR	-3.31923	-1.56366	1.17556	0.239165	-0.940606	0.299746	-0.322056	0.647303	-0.511145	0.0549074	-0.242952	21435227	no	deepskyblue4
Hypocreales	FPROL	1.74896	-0.919877	-0.851449	0.39226	-0.0478574	0.10073	0.243085	-0.197759	0.0508182	0.193396	0.0978794	45202252	no	deepskyblue4
Hypocreales	FPRAE	0.667901	-0.970433	-0.38714	1.00655	-0.149257	-1.01077	0.0666199	-0.0494002	-0.0180865	0.00782784	0.0472733	35000162	no	deepskyblue4
Hypocreales	TREES	-1.04247	-0.240642	1.04737	0.217243	0.57467	-0.278872	-0.185296	0.319471	0.28223	0.103819	-0.10627	33395713	no	deepskyblue4
Hypocreales	TBREVR	0.0319193	-0.539537	0.34996	0.54682	0.415802	0.262306	-0.190094	-0.401231	0.0980536	0.0738774	-0.0626668	38171381	no	deepskyblue4
Hypocreales	TARUN	-0.463399	-0.316194	0.146778	0.279715	-0.0921176	-0.198882	-0.381781	-0.335594	-0.0758787	-0.0735582	-0.148237	36202080	no	deepskyblue4
Hypocreales	SHEPI	-1.54693	-1.38364	-0.0887349	-0.128438	-0.223963	0.698851	-0.426547	0.357332	-0.0462688	-0.155901	0.042347	34485825	no	deepskyblue4
Microascales	CFIMB	-2.71201	0.153929	-1.23324	0.168491	1.62752	-1.63382	0.526884	-0.436866	-0.0264333	0.0990798	0.0776595	30403305	no	chocolate3
Microascales	KPROT	-2.39373	1.56665	1.43138	-0.730081	1.21898	-0.0353448	-0.611796	-0.322865	1.0026	-0.157609	0.00940041	35489142	no	chocolate3
Microascales	CEUCA	-2.55925	0.206878	-0.937466	0.256138	1.34312	-1.71887	0.527731	-0.452127	0.0805039	-0.0349887	0.0491636	29767169	no	chocolate3
Microascales	BCHLA	-1.22202	-0.214317	1.21653	-0.762026	0.576181	-0.21039	-0.34973	0.522493	-0.23308	-0.0238117	0.0217272	33482608	no	chocolate3
Microascales	BFAGA	-2.16932	1.16348	0.187672	0.267215	0.32602	-2.30829	0.93519	-0.59945	0.726309	-0.393774	0.229957	26454062	no	chocolate3
Microascales	KCAPE	-2.69727	1.32264	0.538962	-0.753132	0.660034	-0.214726	-1.05446	-0.000466326	0.987004	0.0898088	-0.116535	35537816	no	chocolate3
Microascales	LPROL	-0.0487321	0.176166	0.938255	0.307126	0.629651	-0.343646	-0.915379	-0.0499965	0.209465	-0.148804	-0.172329	37015954	no	chocolate3
Microascales	ELARI	-2.21311	1.27732	0.933849	1.3151	0.639552	0.0490119	-0.737908	-1.3678	1.41918	-0.27077	-0.208016	32367524	no	chocolate3
Microascales	CSMAL	-3.34108	-0.0995241	0.451685	0.263369	0.647544	-1.00786	0.312075	-0.413325	0.676787	-0.139225	-0.0642674	25180463	no	chocolate3
Microascales	SAPIO	0.720265	0.302274	0.354011	-0.221287	0.418406	-0.235306	-0.0438617	-0.16666	0.0865954	0.114714	-0.114609	43326611	no	chocolate3
Microascales	SAURA	-0.373614	0.575304	0.213195	0.0326682	0.803681	-0.446945	0.439223	-0.193258	-0.251788	-0.122375	-0.00147541	39242057	no	chocolate3
Microascales	CADIP	-1.20659	1.20149	-0.547103	-0.0232502	0.187299	-3.55905	-0.0237333	-0.853064	0.803528	-0.293672	0.134507	28079397	no	chocolate3
Microascales	SDEHO	0.14002	0.11462	0.101581	-0.325418	0.572216	-0.402939	-0.0497148	-0.062646	-0.10597	0.110302	-0.0718388	41052595	no	chocolate3
Microascales	AXYLE	-1.31346	2.06034	-0.441642	-0.353824	-0.912423	-3.47852	-0.480465	-1.06627	0.94745	-0.325126	0.294228	27201902	no	chocolate3
Microascales	CCACA	-2.47628	0.486185	-0.809541	0.247052	1.68025	-1.87664	0.558283	-0.374733	0.17372	0.0820509	0.129814	29722836	no	chocolate3
Microascales	SBREV	0.431286	-0.541413	1.95361	-0.771737	-0.378531	-0.793264	-0.336691	1.03616	-0.370142	0.215683	-0.0776083	33411982	no	chocolate3
Microascales	CTHIE	-2.63719	0.0220708	0.251105	0.0355006	1.40817	-2.58763	0.851258	0.420128	0.423959	0.0484284	0.176365	23333049	no	chocolate3
Microascales	CPLAT	-2.75094	0.20089	-0.670054	0.248718	0.781359	-1.56412	0.379033	-0.541078	0.242781	-0.0274138	0.00395937	28296585	no	chocolate3
Microascales	CMANG	-2.61284	0.407295	-1.32122	0.147743	1.77549	-1.58132	0.415031	-0.517964	-0.0340444	0.208845	0.0945179	31611169	no	chocolate3
Microascales	TMUSA	-2.07761	0.821452	0.28899	0.726556	1.26077	-1.97959	0.752391	0.343402	0.838291	-0.127826	0.133111	28233518	no	chocolate3
Microascales	TPUNC	-2.11386	2.21361	-0.338472	-0.669381	-4.0903	-1.92629	-1.08483	-0.530937	1.17126	-0.127901	0.000450273	27513372	no	chocolate3
Microascales	EPOLO	-2.263	1.43895	1.14738	1.31691	0.582581	0.253332	-0.854293	-1.39566	1.45193	-0.249	-0.158974	32079181	no	chocolate3
Microascales	SBOYD	0.516115	0.0838694	0.394012	-0.219661	0.838685	-0.220904	0.0461847	-0.09736	0.0481052	0.0340312	-0.0805588	42639550	no	chocolate3
Microascales	CALBI	-3.07705	0.551576	-1.05471	-0.265595	1.10238	-1.56634	0.617462	-0.323495	0.0941509	0.402718	0.171437	29251868	no	chocolate3
Microascales	CPOPU	-3.02168	-0.0831531	-0.572391	-0.533667	0.322348	-2.78888	1.11968	0.52312	0.0760708	-0.104915	0.102953	23679771	no	chocolate3
Microascales	DVIRE	-1.52286	1.58473	-0.400118	1.01373	1.225	-1.80378	-0.0685146	-0.812669	0.964729	-0.0848039	0.0102128	33256744	no	chocolate3
Microascales	CHARR	-2.83607	0.266358	0.176164	0.441343	0.677145	-1.45755	0.281133	-0.561684	0.573184	-0.0802741	0.010041	25723254	no	chocolate3
Microascales	TEURI	-1.93892	1.07585	0.154138	0.622276	1.45337	-2.08952	0.48159	0.329324	1.0414	-0.00330417	0.164681	29634442	no	chocolate3
Microascales	DNEOC	-0.402436	1.9551	-0.0888223	0.709323	-0.193834	-2.4316	-0.0763796	-0.695808	0.503897	-0.392331	0.0738582	32657811	no	chocolate3
Microascales	BBASI	-2.51216	-0.152177	-0.158937	0.0273357	0.642841	-2.11063	0.154127	0.0312784	0.415148	-0.0233339	0.0600713	25430605	no	chocolate3
Microascales	TETHA	-2.01436	0.925556	0.121959	0.394367	1.47399	-2.2144	0.615771	0.917013	0.873563	0.0139159	0.178567	29463513	no	chocolate3
Microascales	DEUCA	-1.58551	1.52	-1.68396	-0.485238	0.340134	-1.2879	-0.139336	-0.901113	0.767961	0.0108173	-0.00253556	40932027	no	chocolate3
Microascales	DAUST	-1.49941	1.09156	-0.118595	1.02324	0.190305	-1.30464	0.440346	-0.836245	0.469716	-0.607002	-0.0719386	32397978	no	chocolate3
Sordariales	NCRAS	-0.903463	1.02437	-2.21999	0.280765	0.763835	-1.91088	-0.700256	0.667593	0.212284	0.0705514	-0.0937399	40945278	no	plum4
Sordariales	NAFRI	-1.18291	-0.386479	0.388536	0.602267	-0.159531	0.359967	-1.22376	0.221257	0.471068	-0.424357	-0.201411	35327854	no	plum4
Sordariales	TTERR	-1.17656	-0.23672	0.500644	0.377332	0.355422	0.323645	-1.19613	1.27574	0.238552	-0.0248527	-0.216768	36912256	no	plum4
Sordariales	ANIGRI	-0.876418	-1.35624	0.176522	0.110074	-0.202605	-0.977793	-0.489797	1.65819	-0.0521169	-0.115264	-0.0412537	31024310	no	plum4
Sordariales	NTETRE	-1.05146	0.405079	-1.82594	0.632391	1.47149	-1.53936	-0.560217	0.502747	0.177352	0.0052614	-0.0971171	39144070	no	plum4
Sordariales	CGLOB	0.188816	-0.729442	0.171738	-0.20775	-1.28165	-0.637393	-0.942105	1.01315	-0.31908	-0.211657	0.00995338	34886939	no	plum4
Sordariales	NDISC	-1.19325	0.223759	-1.72369	0.423533	1.07481	-1.84615	-0.467891	0.592898	0.0929869	-0.0160064	-0.138657	37045469	no	plum4
Sordariales	NSUBL	-0.647154	-0.332108	0.972435	0.881313	0.0362411	0.288881	-0.99772	0.326895	0.325402	-0.647273	-0.101323	34618318	no	plum4
Sordariales	SMACR	-0.180711	-0.192032	-1.22181	-0.0209919	0.76857	-1.97122	-0.416458	0.876915	-0.0670063	-0.265321	-0.0218233	37920341	no	plum4
Sordariales	TGRIS	-1.71477	-1.05272	1.07862	0.605929	0.160937	-0.402046	-0.887183	1.14669	0.583283	-0.116902	-0.233388	28753852	no	plum4
Sordariales	NCERE	-0.644615	-0.314392	-2.01404	-0.171388	0.965516	-1.98761	-0.369725	0.86977	-0.149477	-0.180911	-0.0637565	39157959	no	plum4
Sordariales	TTHER	-1.44148	1.1679	0.224793	0.822501	0.921424	0.172684	-0.717155	1.49022	0.295133	0.0796736	0.0206082	38744216	no	plum4
Sordariales	NTETRA	-0.475428	1.05122	-2.97101	-0.559818	-0.871913	-2.3401	-0.927081	0.633158	-0.0231276	-0.0604542	-0.0725124	42319835	no	plum4
Sordariales	PCOMA	-1.35527	-1.26042	-1.62285	0.463647	0.832307	-1.11076	-0.165294	0.944297	-0.161848	-0.280987	0.0543004	34385490	no	plum4
Sordariales	CTHER	-0.889968	-0.262495	0.844356	1.12779	0.494339	-1.34008	-1.23059	0.690776	0.202187	0.0781282	-0.232366	28310656	no	plum4
Sordariales	TUNIS	-0.632338	-1.6823	0.127866	0.246453	-0.206473	-0.638739	-0.483774	1.43146	-0.130125	-0.203959	0.0163233	31664279	no	plum4
Sordariales	PANSE	-1.18982	-1.06672	-1.42914	0.59699	0.770257	-1.03182	-0.146751	0.902421	-0.116275	-0.365152	0.0710122	34718894	no	plum4
Xylariales	MBOLL	-1.37841	-2.0357	-0.459293	-0.557956	0.307631	0.950935	-0.769588	0.963188	-0.129592	-0.141966	-0.11631	38597620	no	#075149
Xylariales	ELIQU	0.999379	2.10132	0.483764	2.25608	0.205204	0.259141	-1.45033	-0.140051	-0.902849	-0.241748	0.104047	39195471	no	#075149
Xylariales	DCONC	0.62914	1.8045	0.377455	2.23788	0.206307	0.241619	-1.39243	-0.167384	-0.996017	-0.16886	0.0480386	37605921	no	#075149
Xylariales	ASTYG	0.212209	0.721877	-0.027798	1.36036	0.0381881	0.501725	-1.9758	-0.41358	-0.655201	-0.398834	-0.107814	38671917	no	#075149
Xylariales	ATRUN	0.245652	0.770028	0.0914191	1.57218	0.0885205	0.391932	-1.24811	-0.152177	-0.662183	-0.302439	-0.0636004	38471937	no	#075149
Xylariales	XPOLY	1.87299	0.838252	1.12715	1.16746	0.292594	0.362603	-1.30659	0.0682399	-0.858244	-0.264331	-0.205921	42901663	no	#075149
Xylariales	HRUBI	0.608557	1.23525	-1.02418	1.54554	0.319047	0.954371	-0.162543	0.32393	-0.610534	-0.0608718	0.12697	48274338	no	#075149
Xylariales	NCLAV	1.58668	-0.742101	-1.20712	-0.114931	-0.256724	0.698908	-0.94272	0.0178505	-0.0242895	-0.459395	-0.122114	50053720	no	#075149
Xylariales	PCURV	0.0241917	-1.27118	0.265134	-0.0893631	-0.88545	0.987284	-0.916606	0.843772	0.201141	-0.1339	-0.0837465	40270628	no	#075149
Xylariales	HFRAG	-0.10574	1.32433	-0.20253	1.35598	-0.27973	0.286491	-1.15599	0.0874915	-0.860331	-0.231529	0.0758729	38166730	no	#075149
Xylariales	MIBER	0.136637	4.17658	-2.51377	1.17655	0.275878	2.50893	-0.748281	0.91195	-0.111651	-0.14177	-0.815557	85464891	no	#075149
Xylariales	HSUBM	0.448842	1.09443	-0.58284	0.965785	-1.21668	0.184418	-1.49027	-0.156432	-0.565727	-0.244128	-0.134901	41220325	no	#075149
Xylariales	APHAE	0.984185	-1.06778	-1.33366	-0.651033	-0.233317	0.666463	-0.476836	0.804798	-0.3584	-0.403604	0.163188	48449939	no	#075149
Xylariales	HPULI	0.361256	1.4251	-0.652149	1.51558	-0.151664	0.67875	-1.11764	0.0705313	-0.633275	-0.0992461	0.0302827	43538995	no	#075149
Xylariales	XMULT	2.0805	1.62154	0.0241886	0.898001	0.303244	-0.431451	-1.75132	-0.0215468	-1.13551	-0.133504	-0.226661	45432464	no	#075149
Xylariales	HRICK	-0.0549395	0.993395	-0.365003	1.44424	-0.000285997	0.665407	-0.946509	0.2345	-0.443225	-0.150774	-0.0450021	41710476	no	#075149
Xylariales	DCHIL	1.12336	2.31424	-0.0180535	1.6662	-0.747975	-0.376527	-1.94382	-0.293155	-1.07685	-0.216527	0.0560177	38574583	no	#075149
Xylariales	HMONT	0.556384	0.932385	-0.390913	1.2413	-0.446337	0.587423	-1.46549	-0.151968	-0.502517	-0.151889	-0.101986	42321440	no	#075149
Xylariales	PKENY	1.15025	-1.07157	-1.23568	-0.281318	-0.359787	0.57322	-0.778938	0.414067	0.156434	-0.332762	-0.0561659	48303483	no	#075149
Xylariales	PTHEA	1.31	-0.752565	-0.815108	0.436465	0.696542	1.20162	-0.702546	0.00191963	0.0399877	-0.282547	-0.179229	50412300	no	#075149
Xylariales	XGRAM	2.23193	3.12685	-0.358585	1.33762	0.452273	0.607925	-1.32501	0.481273	-0.956989	0.0085069	0.0188353	55591673	no	#075149
Xylariales	RNECA	0.225322	0.854057	-0.325397	0.336612	-0.182431	0.573773	-1.43752	0.124882	-0.677609	-0.152814	-0.195699	44161994	no	#075149
Xylariales	PHUNT	-0.259684	2.07261	-0.353596	1.48628	-0.680995	0.401002	-1.1337	0.3044	-0.3937	-0.0589614	0.101191	40356773	no	#075149
Xylariales	DPULV	-0.0475877	-0.0417965	0.237642	-0.856171	0.589136	0.202752	-1.1953	1.81998	0.132381	-0.406828	-0.224746	46777481	no	#075149
Xylariales	MCANN	0.087361	7.41886	-3.72824	1.23879	0.173378	1.95309	-2.74999	1.21003	-0.143869	0.42144	0.386821	88976026	no	#075149
Xylariales	AMALA	0.0395817	-1.14909	-1.49339	-0.462881	0.207934	0.670118	-0.586418	0.477219	-0.295475	-0.303364	-0.00332343	46106596	no	#075149
Xylariales	XLONG	1.69069	0.743418	0.388513	0.823622	0.0540223	0.0435873	-1.35133	0.0201053	-0.96321	-0.246482	-0.120046	42749060	no	#075149
Xylariales	ECINC	-0.0209527	0.901103	-0.472591	1.28518	0.616856	1.65279	-1.21817	-0.488289	-0.815955	-0.330065	0.0222312	44773950	no	#075149
Xylariales	KDEUS	1.31795	1.42301	0.426105	1.07016	-0.0366983	0.63352	-1.53577	-0.0336133	-0.691047	-0.279215	-0.264597	45849281	no	#075149
Xylariales	JMULT	-0.102187	1.36307	0.153188	1.61266	-0.264632	0.679791	-1.18449	0.00702079	-0.46561	-0.217236	0.0843247	38501162	no	#075149
Xylariales	XHYPO	1.62277	3.7273	-0.35968	1.07023	-0.624646	0.213757	-0.109227	-0.123321	-0.155876	0.54953	0.0691973	54341593	no	#075149
Xylariales	PFICI	1.52623	-0.181148	-1.41583	0.0632431	-0.232911	0.722554	-0.872191	0.0182579	-0.0591195	-0.230198	-0.173149	51910726	no	#075149
Xylariales	PVEXA	-0.156463	0.322192	-1.36569	-0.282116	-1.42664	0.539301	-2.10848	0.0808615	-0.289944	-0.210544	-0.282374	44670684	no	#075149
Xylariales	DESCH	0.219976	0.775906	0.314144	1.65856	0.280629	0.272272	-1.69451	-0.417934	-0.983356	-0.26163	-0.0303977	35690703	no	#075149
Xylariales	XFLAB	1.48767	0.914325	0.409917	1.11223	0.0914644	-0.102414	-1.57042	-0.240883	-0.829399	-0.127217	-0.190618	41121324	no	#075149
Xylariales	HLIEN	-0.804822	1.69756	0.022529	1.63571	-0.345411	0.613921	-1.43051	-0.0440097	-0.740921	-0.267847	0.119428	35663853	no	#075149
Diaporthales	DCITRI	2.48455	1.95056	0.146373	-1.02397	-0.506035	1.72448	0.773867	-0.246662	0.617918	-0.0886739	0.431047	63685968	no	indianred4
Diaporthales	DCAPS	1.98991	-0.0324135	0.290707	-1.54115	0.105802	1.88556	0.547823	-0.399033	0.654107	-0.12718	0.257257	57558510	no	indianred4
Diaporthales	DAMPE	2.36221	-0.12067	0.0535997	-2.04797	-0.372899	1.64807	0.422632	-0.582787	0.50632	-0.145689	0.118069	58845437	no	indianred4
Diaporthales	DLONG	2.32115	1.12512	-0.229381	-1.25835	-0.363502	1.71179	0.876782	-0.691222	0.504543	-0.240669	0.0636183	63574151	no	indianred4
Diaporthales	CPICE	0.241418	0.185078	1.37246	-0.662072	0.0668391	0.114635	0.000278626	-0.493326	0.367523	-0.310027	0.129292	39248550	no	indianred4
Diaporthales	CDISP	2.46597	0.808889	3.70525	-0.735479	-0.361537	0.0820248	0.294779	0.480295	0.439165	0.203291	0.180476	41392377	no	indianred4
Diaporthales	CVITI	0.633733	2.59079	0.309227	-1.73713	-2.54435	-1.52766	-0.644615	-0.383005	0.315346	0.104562	0.109069	41538566	no	indianred4
Diaporthales	DASPA	1.5414	0.415693	0.677998	-1.61793	-0.850974	1.37994	0.554647	-0.338103	0.299234	-0.309833	0.127173	53708334	no	indianred4
Diaporthales	DCITRA	1.72742	0.0524993	0.618475	-1.76429	-0.416146	1.22372	0.044298	-0.718514	0.527426	-0.465279	0.0564963	53037939	no	indianred4
Diaporthales	VMALI	-0.259061	1.32625	0.360776	-0.0608024	0.440074	0.434832	0.0818972	-1.08751	0.546776	-0.244909	0.0375054	44019256	no	indianred4
Diaporthales	CMACR	-0.171782	0.226477	1.65886	-0.675147	-0.0264961	0.360919	-0.0321868	-0.262509	0.527585	-0.181266	0.0542408	38703098	no	indianred4
Diaporthales	CLUST	-0.0918268	0.445033	2.20202	-0.360685	0.590224	0.0472253	0.266188	-0.594952	0.209936	-0.0638322	0.0204083	36218583	no	indianred4
Diaporthales	DHELI	0.497694	2.40329	-0.244985	0.0216188	-1.21959	1.41575	1.38743	-0.132661	0.43581	-0.489593	-0.201718	61298713	no	indianred4
Diaporthales	VSORD	-0.522849	-0.032698	1.42662	-0.676809	0.090207	-0.0820014	-0.0694097	-0.356797	0.461657	-0.243001	0.0336767	36069133	no	indianred4
Diaporthales	CJAPO	-0.169686	0.223229	1.7196	-0.684051	-0.0478612	0.360759	-0.0280847	-0.16545	0.537209	-0.189435	0.0821178	38454122	no	indianred4
Diaporthales	CNITS	-0.166587	0.239019	1.65927	-0.664641	-0.0216764	0.360893	-0.0488567	-0.257104	0.515862	-0.178192	0.061203	38640512	no	indianred4
Diaporthales	OCLAV	1.77212	0.168439	1.02272	-1.26588	-0.585108	1.07722	0.179429	-0.421732	0.399732	-0.0975018	0.016584	50617973	no	indianred4
Diaporthales	CLEUCS	-0.386435	-0.0733926	1.13894	-0.631434	0.234229	-0.0838652	0.0687969	-0.357613	0.264297	-0.224337	-0.0108807	37506810	no	indianred4
Diaporthales	CRADI	-0.218778	0.521668	1.61045	-0.96542	-0.180421	0.488141	0.25775	0.145939	0.560414	-0.204008	0.198938	40505085	no	indianred4
Diaporthales	CCARP	-0.447211	0.574578	1.35088	-0.762255	-0.10183	0.725191	0.436401	-0.0102775	0.446741	-0.311588	0.148392	41509779	no	indianred4
Diaporthales	JJUGL	-0.0835339	0.91483	0.461713	-0.622188	-0.501413	1.59448	1.15767	0.109667	-0.28751	-0.852471	0.0758246	47482480	no	indianred4
Diaporthales	JOBLO	0.575391	0.0341546	1.29363	-0.953064	-0.210682	0.930501	0.366356	-0.365061	-0.0861338	-0.524436	0.166415	43264055	no	indianred4
Diaporthales	DDEST	1.62115	1.40719	0.24605	-1.11636	-0.265354	1.27799	0.680408	-0.120647	0.309235	-0.178786	0.459094	56108228	no	indianred4
Diaporthales	CDEUT	1.56407	-0.439832	2.65975	-1.63762	-0.0856905	1.19138	0.586464	-0.237993	-0.285691	0.0813646	0.323525	42567498	no	indianred4
Diaporthales	CNATE	-0.348907	0.257253	1.63326	-0.856855	0.011278	0.493616	0.246436	0.0263086	0.450839	-0.263242	0.179503	39129480	no	indianred4
Diaporthales	CPARA	-0.132463	0.740075	1.34533	-0.416354	0.709127	0.894145	0.0706895	-0.361452	0.585998	-0.177967	0.045196	43838327	no	indianred4
Diaporthales	CCUBE	1.91712	0.0477563	2.69664	-1.60245	-0.300286	0.897109	0.741998	-0.224528	-0.271117	0.319654	0.229497	44030946	no	indianred4
Diaporthales	DCITRC	2.21767	-0.756458	0.510104	-2.15949	-0.220727	1.43836	0.221152	-0.44855	0.636068	-0.122407	0.172025	54347767	no	indianred4
Diaporthales	SMAYD	1.62426	1.00373	1.08265	-1.35886	-0.0325534	1.29767	0.100164	-0.44993	0.323147	-0.326354	-0.00178698	54522152	no	indianred4
Diaporthales	VMALIC	-0.447988	-0.118245	0.974815	-0.510738	0.373158	0.140372	0.041789	-0.48852	0.38086	-0.283807	0.0484879	38115989	no	indianred4
Diaporthales	CAUST	1.44919	-0.198851	2.33199	-1.68348	-0.590877	0.924125	0.557563	-0.265953	-0.389943	0.0462962	0.248723	42191897	no	indianred4
Ophiostomatales	OHIMA1	-5.90406	-1.63166	-3.82705	-0.899061	1.39666	0.371732	-0.195632	-0.966611	-0.198315	0.543189	-0.116868	32191500	yes	orange
Ophiostomatales	RQUERI	-2.39	-0.828745	1.52118	-0.531244	-0.648892	-0.0541735	0.233771	1.02375	0.172316	0.39767	-0.0419051	26411160	yes	orange
Ophiostomatales	FPURP	-1.60981	0.619774	0.901824	-0.850406	-1.30399	-0.0169465	-0.270387	0.636264	0.640528	0.330513	-0.0304681	34748420	yes	orange
Ophiostomatales	RQUERU	-2.30542	-0.783169	1.11578	-0.133442	-0.554247	-0.0862051	0.0302268	0.261701	0.322269	0.32989	-0.0657457	26997563	yes	orange
Ophiostomatales	RSULP	-3.2043	-0.969349	1.26917	-0.623034	-0.516625	0.205532	0.490868	0.960119	-0.120973	-0.0997548	0.198817	23864549	yes	orange
Ophiostomatales	EVERM	-1.99832	1.36929	0.201099	0.0111329	-1.21635	-0.10348	0.141379	0.461991	0.492777	0.64265	0.0304765	33968937	yes	orange
Ophiostomatales	LPROC	-2.14612	-0.766188	0.753219	-0.622723	-0.47918	-0.372789	0.418551	0.503521	-0.380214	0.0269914	0.127662	27500416	yes	orange
Ophiostomatales	LSERP	-1.24245	-1.59538	1.81324	-1.15583	-0.0136801	-0.464038	0.0397653	0.243444	-0.280786	0.271018	-0.117986	28144216	yes	orange
Ophiostomatales	RLAUR	-1.43698	-0.370068	0.702591	-0.748832	-0.955765	0.392149	-0.230641	0.607285	0.179274	0.0975575	0.0438001	34549854	yes	orange
Ophiostomatales	SINSE	-1.13479	0.662371	1.67854	-0.559098	-0.795768	0.091611	0.00530566	0.512127	0.729128	0.187672	0.0174832	34712391	yes	orange
Ophiostomatales	GFRAG	-0.796563	-0.311675	2.00394	-0.613911	0.0696748	0.159714	0.0169239	0.510091	0.397042	0.402706	-0.0985389	34268455	yes	orange
Ophiostomatales	GCLAV	-1.2382	-0.102775	1.60058	0.249398	0.29702	-0.418525	0.409411	0.151854	0.067	0.384045	-0.0818869	29726499	yes	orange
Ophiostomatales	RARXI	-2.44278	0.282217	-0.282829	-1.04699	0.103151	0.523222	0.984571	-0.510469	0.227369	0.137124	0.345656	36751824	yes	orange
Ophiostomatales	RAMBR	-0.931312	-0.078095	1.17078	-1.28528	0.2955	0.646035	0.274265	0.409903	0.522728	0.173375	0.056806	40778497	yes	orange
Ophiostomatales	LLONG	-1.32501	-1.09432	1.58718	-0.199619	-0.0156711	-0.853603	0.0293237	-0.203067	0.0727897	0.223598	-0.195283	27102182	yes	orange
Ophiostomatales	SVARI	0.266461	0.467467	1.24038	-0.489717	-0.0949743	-0.268216	-0.0571	0.394229	0.299663	-0.126226	0.131898	38994385	yes	orange
Ophiostomatales	LWAGE	-1.38605	-1.02921	1.74467	-0.123682	0.263515	-0.647692	0.11742	-0.00594268	0.0889469	0.35065	-0.245791	26985838	yes	orange
Ophiostomatales	CMINU	-4.0255	-1.37811	1.6643	-1.18696	-0.905198	0.405478	0.594498	2.04768	-0.314983	0.359419	-0.00873286	20962931	yes	orange
Ophiostomatales	OIPS1	-6.31322	-2.82607	-2.36778	-1.83861	0.152916	0.0178761	-0.0443589	-0.199185	-0.529841	0.672026	-0.362526	24732719	yes	orange
Ophiostomatales	OMONT	-6.41968	-1.98643	-2.47075	-1.15619	0.565027	0.483724	0.629989	0.354898	-0.494003	0.773835	-0.271635	27102618	yes	orange
Ophiostomatales	OULM785401	-5.94688	-1.90606	-3.9242	-0.914781	1.35124	0.364322	-0.191438	-1.1773	-0.17573	0.631116	-0.183848	31902097	yes	orange
Ophiostomatales	GGALE	-2.44158	-1.03742	1.46413	-0.603685	-0.459225	0.0484688	0.492259	1.05942	-0.385245	0.183646	-0.0168814	26236406	yes	orange
Ophiostomatales	SGLOB	-5.04237	-1.21413	-1.85908	-1.56766	0.217931	1.02316	-0.418057	-0.415873	0.102725	0.471307	-0.153133	33466759	yes	orange
Ophiostomatales	HLIGN	-0.471146	0.374053	0.214534	-0.938564	0.258008	0.535642	-0.0787568	-0.367379	0.267187	-0.0511481	0.0245575	43752609	yes	orange
Ophiostomatales	OPERF	-4.61724	-1.92645	-2.43034	-1.4206	1.17515	0.218943	-0.149874	-0.93569	-0.375511	0.507586	-0.245178	32675258	yes	orange
Ophiostomatales	OSTEN	-4.23657	-1.99465	-3.05928	-1.81773	0.637654	0.846657	-0.456077	-1.13146	-0.0452679	0.218848	-0.3197	38662062	yes	orange
Ophiostomatales	GPENI	-0.240539	-0.150522	3.53274	-1.0757	-0.120801	-0.736055	1.14024	1.00161	-0.47826	1.10631	-0.0140592	27679855	yes	orange
Ophiostomatales	ONOVO	-5.54501	-0.934756	-3.52	-1.23406	0.696505	0.0791983	0.125338	-0.895231	-0.368523	0.461584	0.0493718	31855394	yes	orange
Ophiostomatales	LLUND	-1.40862	-0.638823	2.1739	-0.572162	-0.259749	-0.651985	0.431963	0.866043	-0.0806894	0.436724	-0.0200884	26383988	yes	orange
Ophiostomatales	SBRAS	-5.01073	-1.08936	-1.66351	-1.68276	0.129517	1.0018	-0.380583	-0.351818	0.0954829	0.411994	-0.110163	33205847	yes	orange
Ophiostomatales	CBREV	-3.88467	0.0775241	2.39858	-1.55702	-0.271686	-0.206142	1.30967	0.0699492	0.126751	0.22976	0.232161	20718301	yes	orange
Ophiostomatales	SPALL	-5.37478	-1.37115	-3.19561	-1.60676	0.225993	1.47012	-0.255724	-0.445814	-0.103381	0.484615	-0.141208	37654874	yes	orange
Ophiostomatales	LWING	-1.487	-0.73959	1.76995	-0.0324681	0.173718	-0.541945	0.375012	0.262039	0.136786	0.325009	-0.259949	27646212	yes	orange
Ophiostomatales	SSCHE	-5.10241	-1.16399	-1.67	-1.67827	0.0286725	0.901114	-0.421188	-0.317606	0.118303	0.501855	-0.151423	32375103	yes	orange
Ophiostomatales	OPICE	-4.73999	-1.26539	-2.38202	-1.27968	0.944961	0.255275	0.161908	-0.385284	-0.301302	0.51945	-0.0567103	32840360	yes	orange
Ophiostomatales	OTRIA	-5.94242	-0.867926	-3.83224	-2.65613	-2.41295	-0.410278	-0.480517	0.0332623	-0.0691191	0.51347	0.0493491	29232673	yes	orange
Ophiostomatales	SPHAS	-4.05281	-0.757418	-0.664373	-2.62262	-0.0491574	-0.0894745	0.19628	-0.00568929	-0.698898	0.147264	0.196926	30155788	yes	orange
Ophiostomatales	RALBI	-0.859167	-0.104668	0.68455	-0.767593	-0.0750082	0.421638	0.0867224	0.18682	0.392373	0.143039	0.0508603	39037733	yes	orange
Ophiostomatales	OXXXX	-4.53972	-1.83372	-2.24969	-1.44144	1.11155	0.234917	-0.00298921	-0.801495	-0.420037	0.388388	-0.208818	32459019	yes	orange
Ophiostomatales	RAGUA	-1.09927	-0.727433	1.584	-0.787105	-0.0510391	0.832689	0.376724	0.999074	0.265667	0.279319	0.106302	35901347	yes	orange
Ophiostomatales	OPOPU	-6.1199	-1.81324	-2.55929	-2.97579	0.851979	0.408072	0.820629	-0.425151	-1.80527	0.631404	0.258784	27775387	yes	orange
Ophiostomatales	OQUER1	-6.24386	-2.59459	-4.58547	-1.2626	1.44536	0.34472	-0.266803	-0.856111	-0.564434	0.739877	-0.239133	32131819	yes	orange
Glomerellales	CECHI	1.15561	3.95831	-0.149372	-0.621755	1.86381	0.0964006	-0.207563	0.524428	0.00790223	0.193862	0.229823	62246358	no	darkolivegreen4
Glomerellales	FFURC	0.874904	-1.36755	1.94373	-0.901183	0.0332318	0.894158	-0.0410247	0.817285	0.228559	0.118433	0.0979636	40320693	no	darkolivegreen4
Glomerellales	CCOCC	2.06943	0.549263	0.816902	-1.73621	1.32716	-0.935788	-0.227934	-0.101277	-0.214351	-0.0719724	-0.27248	49803648	no	darkolivegreen4
Glomerellales	CCHLO	2.11918	2.37418	0.25114	-1.95743	0.343356	-1.34685	-0.322522	-0.565981	-0.476249	-0.0814811	-0.125037	52273306	no	darkolivegreen4
Glomerellales	RTULA	1.96525	3.76919	2.17036	-3.75593	-2.72994	-1.21504	-1.61964	-2.33299	-1.08675	0.500109	0.000667167	42858694	no	darkolivegreen4
Glomerellales	CCAME	2.7512	1.14974	-0.132044	-1.45776	1.91765	-0.143701	0.648251	-0.120826	-0.250014	-0.149496	-0.315602	62168980	no	darkolivegreen4
Glomerellales	CACUT	1.9718	1.23252	0.889529	-1.65762	1.91002	-0.450489	0.08102	-0.452547	-0.339642	-0.0187559	-0.0857721	52091936	no	darkolivegreen4
Glomerellales	CNYMP	1.88273	0.848654	1.0208	-1.63868	1.67057	-0.502753	0.340179	-0.517378	-0.495168	-0.134085	-0.137305	50226987	no	darkolivegreen4
Glomerellales	VKLEB	0.0696419	-0.701354	1.54647	-1.21924	0.359512	-0.550932	-0.0890049	0.798018	-0.166921	-0.0977825	0.0806868	35906903	no	darkolivegreen4
Glomerellales	PCUCU	0.772064	-1.02725	1.02515	-1.08714	0.0178359	-1.23499	0.196609	1.35085	-0.109143	-0.0404591	0.0618179	36966620	no	darkolivegreen4
Glomerellales	VZARE	0.214913	-0.760091	1.50187	-1.22808	0.407886	-0.41227	0.0129496	0.820299	-0.195722	-0.0862218	0.105716	36933468	no	darkolivegreen4
Glomerellales	CAENI	3.11436	0.975479	-0.444145	-2.30413	1.62209	-1.20461	0.151268	-0.0150164	-0.4348	-0.120537	-0.212283	59094541	no	darkolivegreen4
Glomerellales	CSIDA	2.14421	4.60939	-1.47706	0.46931	-0.458771	-0.201089	2.81114	1.04558	-0.197227	0.0142078	-0.414403	82194425	no	darkolivegreen4
Glomerellales	CGLOE	2.7633	1.33131	-0.0838805	-1.48406	2.12859	-0.295159	0.303087	-0.0820785	-0.202552	-0.0704062	-0.21429	61016191	no	darkolivegreen4
Glomerellales	CSCOV	2.07029	1.32237	0.789166	-1.78241	1.75669	-0.641863	0.0917292	-0.428209	-0.417507	-0.0397417	-0.0460701	52032179	no	darkolivegreen4
Glomerellales	CLIRI	2.13699	1.0456	0.512214	-1.92598	1.29077	-0.928096	-0.102963	-0.209968	-0.289106	-0.134898	-0.27235	52805335	no	darkolivegreen4
Glomerellales	CDEST	1.90121	0.590762	0.0848735	-2.02574	0.992566	-0.937725	0.0680531	0.284539	-0.157282	0.150364	-0.143788	52114680	no	darkolivegreen4
Glomerellales	CSHIS	1.35072	2.53925	-0.52892	-0.89961	-0.480739	-0.554238	1.64598	0.792013	-0.324233	-0.472325	-0.583778	61578973	no	darkolivegreen4
Glomerellales	CSIAM	2.88644	1.2654	-0.0969344	-1.79441	2.23474	-0.131256	0.186996	-0.198945	-0.154518	-0.0433546	-0.248009	62549958	no	darkolivegreen4
Glomerellales	CSANS	1.76405	0.657242	1.20857	-0.890136	0.556487	-0.682971	0.48797	-0.238622	-0.62999	-0.673713	-0.401134	46781577	no	darkolivegreen4
Glomerellales	VNONA	-0.742534	-0.268714	1.87784	-0.572086	0.5012	-0.509377	-0.115932	0.288917	-0.211257	-0.226112	0.0351644	31555232	no	darkolivegreen4
Glomerellales	CMUSI	2.23053	-0.353178	0.342223	-1.51436	1.37116	-0.920318	0.638475	0.777537	-0.336097	-0.15516	-0.106631	50633311	no	darkolivegreen4
Glomerellales	CSOJA	2.18138	-0.370721	0.571684	-1.58728	1.29895	-1.02811	0.439688	0.883088	-0.37864	-0.0103682	-0.0129737	48331699	no	darkolivegreen4
Glomerellales	SALKA	-0.688308	4.54469	1.23116	-1.77925	0.670325	-0.703021	-1.07472	-0.792157	-0.051147	0.335951	0.348186	43450096	no	darkolivegreen4
Glomerellales	CSIMM	2.02834	0.971858	1.06476	-1.42547	1.50191	-0.57138	0.0819894	-0.429616	-0.260252	-0.057504	-0.185002	50175871	no	darkolivegreen4
Glomerellales	CORCH	1.4279	1.47425	0.838708	-1.33448	1.66876	-0.735759	0.0904695	-0.332268	-0.522064	-0.107173	0.000310081	48387109	no	darkolivegreen4
Glomerellales	CPLUR	2.30293	-0.420132	0.495533	-1.56695	1.54831	-1.17372	0.580134	0.933627	-0.374871	0.0617629	-0.014103	48777512	no	darkolivegreen4
Glomerellales	CSALI	1.77081	0.570644	1.5609	-1.26223	1.40005	-0.455205	0.12677	-0.355502	-0.439726	-0.27511	-0.173593	46788685	no	darkolivegreen4
Glomerellales	CTROP	2.70328	0.628355	0.257457	-1.67503	1.88889	-0.693371	0.318875	-0.0197275	-0.356852	-0.0538142	-0.17609	55486036	no	darkolivegreen4
Glomerellales	CTRUN	2.4211	2.07205	0.734032	-1.97356	2.94279	-0.874077	0.0233925	-0.997505	-0.601505	-0.115719	-0.182778	56073331	no	darkolivegreen4
Glomerellales	CVINI	2.64323	2.05252	-0.298441	-1.25946	1.67333	-0.14535	1.14287	0.0388924	-0.257248	-0.232921	-0.372966	65522896	no	darkolivegreen4
Glomerellales	CASIA	2.87864	1.55534	-0.170118	-1.51179	1.8047	-0.218402	0.580909	-0.0908216	-0.224377	-0.102264	-0.300029	63665438	no	darkolivegreen4
Glomerellales	CKARS	2.38677	0.26589	0.405619	-1.41825	1.52064	-0.618014	0.41469	0.114835	-0.42792	-0.0240633	-0.0726548	51736014	no	darkolivegreen4
Glomerellales	CLENT	1.5989	3.75101	0.519681	-2.15867	0.609419	-0.929732	-0.100081	-0.224323	-0.0811941	0.00972152	0.248985	56099130	no	darkolivegreen4
Glomerellales	CLIND	2.00848	5.71674	-1.63578	0.849795	0.632203	0.20127	2.44905	1.26471	-0.149135	0.12175	-0.398984	98205194	no	darkolivegreen4
Glomerellales	CFIOR	1.61146	1.27771	1.74462	-1.34648	1.27543	0.446579	-0.185725	-0.949636	-0.044974	-0.187728	-0.155659	50127237	no	darkolivegreen4
Glomerellales	CSPIN	2.31754	4.48245	-1.47612	0.313167	-0.472913	-0.521063	2.64678	0.947476	-0.188816	0.0497553	-0.400611	79991326	no	darkolivegreen4
Glomerellales	CELEU	1.27063	2.33814	0.699641	-1.50871	1.711	-0.374753	-0.41114	-0.0427498	-0.144646	-0.0491595	-0.0310342	53507824	no	darkolivegreen4
Glomerellales	CFALC	0.0559091	0.801709	-0.0703643	-1.02664	0.773907	0.150041	0.325404	0.356377	-1.21267	-0.619712	0.152468	46027752	no	darkolivegreen4
Glomerellales	CHIGG	0.908188	-0.823175	-0.929344	-1.12522	0.959696	-0.087691	-0.0329855	0.851437	0.133414	0.162113	-0.191618	50716103	no	darkolivegreen4
Glomerellales	CFRUC	2.87584	0.471908	0.2079	-2.0463	1.9949	-0.568594	0.285509	-0.0901207	-0.280923	-0.133189	-0.250845	57727515	no	darkolivegreen4
Glomerellales	VISAA	0.0503816	-0.68304	1.50685	-1.13516	0.275707	-0.610999	-0.178588	0.805552	-0.126087	-0.106616	0.0522611	35627949	no	darkolivegreen4
Glomerellales	CGRAM	1.22238	2.1556	0.866552	-0.58593	1.31534	-0.446813	0.515897	-0.115883	-0.151455	-0.123807	-0.163501	51490214	no	darkolivegreen4
Glomerellales	CORBI	2.32685	7.10228	-2.06166	0.843675	2.52758	0.156311	0.116934	1.1385	0.0446087	0.739275	0.664804	89672556	no	darkolivegreen4
Glomerellales	CINCA	2.13034	1.10129	0.790713	-1.75067	1.59838	-0.886924	-0.098265	-0.45862	-0.339146	-0.233795	-0.35541	52324055	no	darkolivegreen4
Glomerellales	VTRIC	0.156187	-0.583105	1.87161	-1.07251	0.56392	-0.477712	-0.0684609	0.668024	-0.00550382	-0.183406	0.0700891	36011434	no	darkolivegreen4
Glomerellales	CSUBL	1.64901	3.49372	0.0825043	-0.979291	1.30058	-0.177074	0.587158	-0.340331	-0.141738	-0.144568	-0.258517	63531369	no	darkolivegreen4
Glomerellales	VALBO	0.210956	-0.607579	1.5677	-1.13427	0.666841	-0.55254	0.0938745	0.4893	-0.224483	-0.0249146	0.0816411	36443197	no	darkolivegreen4
Glomerellales	VDAHL	0.288441	0.881748	1.7503	-1.86109	-0.625255	-1.5497	-0.137552	-0.384527	-0.22835	-0.297659	0.256886	33865416	no	darkolivegreen4
Glomerellales	CTRIF	3.3485	7.56719	-4.15015	-1.92848	-6.37211	-2.42832	1.72043	0.637247	-0.108763	0.0169645	-0.782717	107344398	no	darkolivegreen4
Glomerellales	CTANA	0.905933	2.33448	0.0486361	-1.28268	1.01209	-0.418518	0.617891	0.32877	-0.235829	-0.166467	-0.102028	55605891	no	darkolivegreen4
Glomerellales	VNUBI	0.200579	0.378371	1.19803	-0.979884	0.31281	-0.78541	-0.192628	0.114953	-0.169385	-0.240826	0.0805051	37712383	no	darkolivegreen4
Glomerellales	CTOFI	2.09236	0.979024	0.73443	-1.85009	1.57127	-0.861141	-0.0277125	-0.208721	-0.255714	-0.164568	-0.234496	52163964	no	darkolivegreen4
Glomerellales	CTHEO	2.39443	0.427553	0.342832	-1.64228	1.63884	-0.393008	0.320204	-0.0573081	-0.344527	-0.222086	-0.230802	54950571	no	darkolivegreen4
Coniochaetales	CPRUN	-0.846972	-1.56226	0.0288513	0.345049	-0.495669	-0.0955033	-0.794803	0.641302	-0.0517699	-0.201902	-0.0708172	32300201	no	#008B45
Coniochaetales	CLIGN	-0.197896	-0.931104	-1.30717	0.193835	-0.0364578	-0.0316407	-0.648433	0.668471	0.0111957	-0.246475	-0.143543	42252342	no	#008B45
Coniochaetales	CHOFF	-0.608101	-1.66293	0.293555	0.361242	0.163464	-0.701936	-0.432698	1.34186	-0.400526	-0.530166	0.160378	30334506	no	#008B45
Coniochaetales	CPULV	-1.19392	-1.13317	-1.54969	0.419487	-0.0993863	-2.19571	-0.0644544	0.755298	-0.38694	-0.0846817	-0.0269018	29676097	no	#008B45
Magnaporthales	FORYZ	1.00746	-0.268286	0.655414	-2.5604	0.220562	1.04653	0.639361	0.191031	-0.250041	-0.194589	0.403832	50480613	no	maroon4
Magnaporthales	PORYZ	0.221505	3.10949	-2.51466	-4.49622	-8.64734	-2.91843	-2.53109	-0.670797	0.475898	0.0690193	0.0583082	40962379	no	maroon4
Magnaporthales	MINCR	-0.169308	-0.59376	1.69486	-2.05734	-0.258582	0.49683	0.625322	0.656202	-0.34197	0.00581105	0.326972	38676959	no	maroon4
Magnaporthales	GTRIT	0.721817	1.33288	-0.022278	-2.94922	-3.03393	-0.872853	-0.297352	-0.244912	-0.169083	-0.0061811	0.301231	43266751	no	maroon4
Magnaporthales	NAORYZ	-0.576206	-0.756336	1.82573	-2.11631	-0.139208	0.284485	0.79258	0.832582	-0.813969	-0.0848153	0.493398	34409330	no	maroon4
Magnaporthales	PPENN	-0.806819	1.83123	-0.318981	-0.213014	1.1201	0.847975	-0.0944923	-0.331329	0.221569	-0.174171	0.122328	48732591	no	maroon4
Magnaporthales	MRHIZ	-0.157927	0.0257045	1.5093	-1.45448	-0.228845	0.298832	0.459334	0.49008	-0.0509094	-0.0371096	0.214961	39513226	no	maroon4
Magnaporthales	PGRIS	-0.666057	1.00916	0.00828208	-0.0861132	1.08448	0.707197	0.0424776	-0.617645	0.266148	-0.194722	0.114544	44540102	no	maroon4
Magnaporthales	ODOLI	-0.500093	0.0889202	1.97185	-2.26271	0.341104	0.886821	0.396133	-0.0948321	0.344319	-0.185879	0.210848	42280048	no	maroon4
Magnaporthales	PLIGN	-0.655577	-0.0689168	1.50022	-1.92876	0.00876669	0.684246	0.038485	-0.228297	0.405433	-0.404192	0.139718	40899037	no	maroon4
Helotiales	SSCLE	1.35907	1.77529	0.952417	1.89911	-0.204644	-0.279638	0.228555	-1.03465	0.166761	0.469846	0.0895322	38459164	no	NA
Helotiales	HHEPA	2.61887	2.10607	1.00246	1.31728	-0.706933	2.34989	0.74603	-0.817067	0.188899	0.836712	-0.00837927	57285804	no	NA
Sordariomycetes incertae sedis	DRIGI	-0.0433946	-1.09383	0.577981	0.0145631	0.0736204	1.53279	-1.2781	0.560452	-0.190238	-0.400476	-0.123616	41729728	no	NA
Symbiotaphrinales	SKOCH	2.65149	-0.574357	5.15241	1.27555	-1.39779	0.0985254	-0.181914	-0.769426	-1.32772	2.29049	-0.385908	24834845	no	NA
Helotiales	CLONG	3.78007	-0.404019	1.70677	0.187975	-0.85702	2.57064	0.386485	-1.07273	0.414277	1.0757	0.0738031	52432785	no	NA
Togniniales	PMINI	1.30759	0.629229	1.25697	-0.90262	-0.338843	1.14674	-0.663121	-1.38043	0.0245363	-0.354626	-0.123943	46963036	no	NA
Trichosphaeriales	NIORYZ	1.46321	-0.399154	1.85789	-2.40893	-0.0600846	0.347142	0.929321	0.833897	-0.73891	0.0592501	0.585343	43214190	no	NA
Phyllachorales	PMAYD	-1.66935	1.80693	1.76452	0.882981	-1.0473	1.35442	2.38272	0.973158	-0.485692	0.20511	-0.633633	42699913	no	NA
Helotiales	LHYAL	2.25464	0.320091	3.10502	1.4248	-1.22522	0.393552	0.0658284	-0.820223	-0.132607	0.960809	-0.0658842	33631343	no	NA
Helotiales	BCINE	1.44486	1.31249	0.389342	1.68789	0.0567625	0.139032	0.36576	-0.906275	0.26391	0.383588	0.0826185	42630066	no	NA
Helotiales	ASARC	1.49869	0.628931	2.17074	1.29128	-0.531975	0.0378202	0.0736655	-0.881091	-0.20468	0.589101	0.0411507	34247354	no	NA
Helotiales	GLOZO	2.0679	0.181525	1.86468	1.44152	-0.358713	0.971953	0.162474	-1.05307	-0.105385	0.737068	-0.00851518	39509734	no	NA
Leotiomycetes incertae sedis	PDEST	-0.35641	0.846977	0.491696	-0.904709	-1.50218	0.590406	1.37004	-0.0427663	-1.23729	0.601819	0.718463	35744877	no	NA
Trichosphaeriales	NSPHA	2.20874	-0.183483	0.737768	-2.98983	-0.213629	0.201705	0.721522	0.63117	-0.52312	-0.0604197	0.462583	51468253	no	NA
Xylonales	XHEVE	2.13003	0.73481	4.69434	2.11461	-0.335722	-0.93707	0.267285	-0.487746	-0.505335	1.66533	-0.24259	24337763	no	NA
Xylonales	TGUIA	2.26725	0.39898	4.67167	2.15091	-0.341266	-0.948296	0.0233966	-0.895242	-0.607965	1.63668	-0.297492	24074222	no	NA
