# Supplementary material for: Lifestyles shape genome size and gene content in fungal pathogens
Source: eLife. 2025 Dec 16;14:RP104975. doi: 10.7554/eLife.104975 (PMC12707824; doi:10.7554/eLife.104975)
Supplement: Figure 1—source data 3. [file elife-104975-fig1-data3.xlsx]

## Sheet: Figure1_SourceData2_loadings
feature	PC	score	feature.2
genes	PC1	0.406158	Genes
genes	PC7	0.160668	Genes
genes	PC6	0.370346	Genes
genes	PC5	-0.0444055	Genes
genes	PC4	-0.202614	Genes
genes	PC3	-0.256132	Genes
genes	PC2	-0.231849	Genes
frac_repeats	PC7	0.427084	Repeats
frac_repeats	PC6	0.245773	Repeats
frac_repeats	PC5	-0.0861987	Repeats
frac_repeats	PC4	0.0330769	Repeats
frac_repeats	PC3	-0.0530665	Repeats
frac_repeats	PC2	0.543426	Repeats
frac_repeats	PC1	-0.166169	Repeats
assembly_noreps	PC2	0.0628177	Genome w/o repeats
assembly_noreps	PC1	0.421621	Genome w/o repeats
assembly_noreps	PC7	-0.0171896	Genome w/o repeats
assembly_noreps	PC6	0.307861	Genome w/o repeats
assembly_noreps	PC5	0.180882	Genome w/o repeats
assembly_noreps	PC4	-0.275837	Genome w/o repeats
assembly_noreps	PC3	-0.309661	Genome w/o repeats
propGC	PC7	-0.26925	GC
propGC	PC6	-0.0509503	GC
propGC	PC5	0.0667948	GC
propGC	PC4	-0.5743	GC
propGC	PC3	0.325294	GC
propGC	PC2	-0.392591	GC
propGC	PC1	-0.101178	GC
N_introns	PC3	0.37707	Introns
N_introns	PC2	0.0834025	Introns
N_introns	PC1	0.440219	Introns
N_introns	PC7	0.045762	Introns
N_introns	PC6	0.0344154	Introns
N_introns	PC5	-0.0700623	Introns
N_introns	PC4	0.0387411	Introns
F_intron_genes	PC7	0.025621	Genes with introns
F_intron_genes	PC6	-0.359663	Genes with introns
F_intron_genes	PC5	0.0234867	Genes with introns
F_intron_genes	PC4	0.157857	Genes with introns
F_intron_genes	PC3	0.457826	Genes with introns
F_intron_genes	PC2	0.188611	Genes with introns
F_intron_genes	PC1	0.337475	Genes with introns
LEN_introns	PC4	-0.630106	Intron length
LEN_introns	PC3	0.296003	Intron length
LEN_introns	PC2	0.335419	Intron length
LEN_introns	PC1	-0.138219	Intron length
LEN_introns	PC7	0.341304	Intron length
LEN_introns	PC6	1.33308e-06	Intron length
LEN_introns	PC5	0.176387	Intron length
LEN_exons	PC7	0.0806058	Exon length
LEN_exons	PC6	-0.13232	Exon length
LEN_exons	PC5	0.0631417	Exon length
LEN_exons	PC4	-0.10233	Exon length
LEN_exons	PC3	-0.224622	Exon length
LEN_exons	PC2	-0.088464	Exon length
LEN_exons	PC1	-0.469076	Exon length
LEN_intergenic	PC5	0.422116	Intergenic length
LEN_intergenic	PC4	-0.0511701	Intergenic length
LEN_intergenic	PC3	-0.150097	Intergenic length
LEN_intergenic	PC2	0.512535	Intergenic length
LEN_intergenic	PC1	0.0171966	Intergenic length
LEN_intergenic	PC7	-0.667839	Intergenic length
LEN_intergenic	PC6	0.0148155	Intergenic length
tRNA	PC7	0.305281	tRNA
tRNA	PC6	-0.690109	tRNA
tRNA	PC5	0.328098	tRNA
tRNA	PC4	-0.106802	tRNA
tRNA	PC3	-0.399565	tRNA
tRNA	PC2	-0.0451176	tRNA
tRNA	PC1	0.250111	tRNA
pseudo_tRNA	PC6	-0.283803	Pseudo tRNA
pseudo_tRNA	PC5	-0.791851	Pseudo tRNA
pseudo_tRNA	PC4	-0.322485	Pseudo tRNA
pseudo_tRNA	PC3	-0.240485	Pseudo tRNA
pseudo_tRNA	PC2	0.255481	Pseudo tRNA
pseudo_tRNA	PC1	0.0987538	Pseudo tRNA
pseudo_tRNA	PC7	-0.232492	Pseudo tRNA
