# Supplementary material for: Lifestyles shape genome size and gene content in fungal pathogens
Source: eLife. 2025 Dec 16;14:RP104975. doi: 10.7554/eLife.104975 (PMC12707824; doi:10.7554/eLife.104975)
Supplement: Figure 1—source data 4. [file elife-104975-fig1-data4.xlsx]

## Sheet: Figure1_SourceData3
node	pic.genome	pic.frac_repeats	pic.LEN_intergenic	pic.LEN_introns	pic.N_introns	pic.dNdS	pic.gene_loss
543	-0.395502	-0.34623	-0.550895	0.543293	0.0822408	-0.0715152	0.110699
544	0.030589	-0.237139	0.568091	0.387521	0.16643	-0.129438	0.903278
545	-0.50777	0.397177	-0.7103	-0.824951	-0.323189	0.0412754	-1.25713
546	0.135174	-0.445725	-0.541332	-0.378358	0.113633	-0.207311	3.9335
547	0.0228989	0.241403	0.353833	0.237584	-0.123283	0.0155327	0.409556
548	0.250449	-0.137574	0.429641	0.0383327	-0.00471916	0.115849	-0.0515253
549	-0.28971	1.25175	0.45906	0.265937	-0.140556	0.20177	2.44289
550	0.0815155	0.0101753	-0.0767905	0.229856	0.0556182	-0.0962811	0.509886
551	-0.409286	0.547714	-0.266863	0.0679568	-0.28467	-0.0787042	1.77528
552	0.0986235	-0.50931	0.321259	0.186164	-0.0393439	0.247101	-1.73801
553	-0.426556	2.03227	-0.0405789	0.42352	-0.157893	0.234559	2.89395
554	0.154559	0.298859	-0.839867	-0.195414	0.120441	-0.0209172	-1.39541
555	0.29148	4.72214	-0.343646	0.405614	-0.405057	-0.0359265	-0.0531072
556	0.217472	0.187192	0.08551	0.592382	-0.285586	-0.231235	5.22819
557	-0.945014	-1.49383	0.0909268	-0.148322	-0.0113452	-0.0184072	1.95034
558	0.0533429	1.09672	-0.693335	-0.0609115	0.0329127	0.0240504	0.0425049
559	0.760462	1.60078	-0.925844	-0.156215	-0.0279647	0.0527893	0.432152
560	-0.607215	-3.08779	0.135608	-0.112691	0.334455	0.42886	-2.46423
561	-0.0491341	0.13167	-0.459938	-0.0606826	-0.115651	-0.226455	-15.2308
562	0.76039	0.148401	0.466225	0.000939899	0.158078	-0.0287513	-16.5284
563	0.448139	-0.499172	0.309134	0.13748	0.0833475	-0.0433928	-30.0104
564	-0.0454336	-0.168213	-0.21478	0.00833981	0.150028	0.132055	-105.447
565	1.00485	2.72529	2.58086	0.515685	0.527155	-1.12168	0
566	-0.261503	0.377624	0.273302	0.197496	0.167143	0.104069	0
567	-0.927105	-0.0876477	-0.684625	-0.0270659	-0.134564	0.0936035	7.50785
568	0.0313768	-0.431448	0.134765	-0.105025	0.0251744	0.327449	-3.54852
569	0.0470993	-0.26202	0.00478926	-0.032736	-0.0559008	0.620877	14.6642
570	-1.14951	0.742657	-2.19155	-0.180283	-0.130339	-0.250368	18.5688
571	0.110401	-0.484738	0.251636	0.0597817	0.13379	-0.149156	4.71994
572	-1.02376	-1.59548	0.471811	-0.0204878	0.411156	-0.172582	-1.14927
573	-0.00574479	-0.0160928	-0.119486	-0.0446032	-0.10771	-0.325114	-0.556232
574	-1.20442	-1.56103	-0.62698	-0.000993648	-0.523839	-0.0377087	-2.80399
575	-1.18067	-1.85299	-0.90116	-0.328865	-1.1244	-0.107077	-8.50229
576	0.260993	0.446078	0.833178	0.137353	0.335589	0.0827767	-5.66278
577	0.430541	1.06632	-0.0710717	-0.0301772	0.116899	0.287559	6.05802
578	-1.2616	-1.56	0.509579	-0.120834	-0.0437271	-0.631541	8.49804
579	-0.661613	-1.39335	-2.7139	-0.128133	-0.12317	0.0173648	9.45142
580	1.83011	5.40866	-1.1533	-0.189283	-0.282849	0.0370949	5.63933
581	2.58672	3.12225	0.137033	-0.0119715	-0.182202	-0.176519	-4.87739
582	-1.15128	0.10172	-0.927457	-0.0191832	-0.371993	-0.125175	-7.37833
583	3.58277	1.92041	2.233	0.303554	0.310442	-0.246128	0
584	-3.12901	-6.44938	-1.45239	0.000525207	0.0140359	0.209852	4.95034
585	0.420462	1.40766	-5.88075	-0.199079	-0.130576	-0.0638113	4.41814
586	-0.0652988	0.0331623	0.0492572	0.185098	-0.183633	0.111439	11.9007
587	2.48208	4.29439	1.47355	0.172479	0.00329984	0.659189	-10.9289
588	-0.25666	3.76199	0.454803	0.157616	-0.188918	0.0349876	2.75
589	-0.889001	-3.60575	-0.10894	0.206451	-0.0155207	-0.0956296	2.50681
590	-0.0684922	0.214416	-0.506695	-0.133507	-0.0110082	0.00758431	0
591	0.549164	1.83355	1.45546	0.265853	0.090355	-0.00297821	0.504104
592	0.193531	-0.426855	0.65162	-0.0433358	0.101814	-0.0070746	0.707038
593	0.659095	-1.38072	-0.103589	-0.216586	0.14707	0.0383553	-0.327758
594	0.470578	-0.669669	0.0901039	0.0976606	-0.0372442	-0.0204888	-1.0461
595	0.894953	-1.04984	0.468507	-0.157611	0.0387552	0.00741794	-3.32895
596	-0.343637	-0.0915628	0.604213	0.235318	0.158847	0.15069	2.70746
597	-0.421752	-3.67126	0.586506	-0.0895496	0.0517567	-0.583313	13.9968
598	-0.366605	2.50716	-1.3256	0.021672	-0.181032	-1.15633	8.14687
599	1.99695	5.09527	0.218167	0.346772	-0.703146	-2.86575	21.7041
600	0.576753	1.22217	0.932821	0.100203	-0.199932	0.303604	1.88011
601	1.09845	0.942025	0.976791	0.0309385	0.00246784	-0.0226575	1.72992
602	-1.20291	0.141697	-0.679004	0.0169781	-0.0568769	-0.0715291	-1.5074
603	1.38617	1.99319	2.70475	0.480821	0.0650303	0.0672023	-2.37444
604	-0.192293	-0.390956	-0.599337	0.0328464	-0.120209	0.0157133	-0.517586
605	-1.28793	-2.77262	-3.7873	-0.489735	-0.137432	0.0724078	3.35638
606	1.05233	2.07999	1.16829	0.136328	0.00922347	0.00605144	-0.0674343
607	2.40789	2.3471	5.72421	-0.126965	-0.0601615	-0.00584855	1.206
608	-1.03597	-0.0835762	-0.369065	-0.350314	0.0992072	0.00805155	1.94617
609	-0.519288	-0.502139	-0.714521	-0.104734	0.132525	0.105739	0.427293
610	-0.254802	0.140022	-0.433913	0.0273455	0.0233986	-0.0302934	-0.11277
611	0.643717	0.331646	0.402339	-0.138711	0.102909	-0.0310839	-4.89933
612	-0.00113519	-0.318563	0.258808	0.0266235	0.00255532	-0.0205753	-0.21096
613	1.08898	-0.941091	1.25602	0.0402407	0.167729	0.00970348	-1.50252
614	0.282862	-0.688754	-0.738465	-0.107236	0.0894649	0.293656	-1.86871
615	0.338669	1.50441	1.01809	0.275612	0.137283	-0.0459015	0.99761
616	-0.0922646	-0.576538	-0.493929	-0.106096	0.00800963	0.156518	1.30511
617	-0.264277	-0.545684	-0.387419	0.0417953	-0.0411802	-0.574962	0.766367
618	0.685672	-1.01042	0.0272494	-0.710133	0.203961	-0.199382	-2.01005
619	0.0607526	-0.164818	0.0526179	-0.0287633	0.0186405	-0.645215	0.858647
620	-0.502223	-1.67313	-0.805223	0.190029	-0.102565	0.0805016	-0.816384
621	0.309293	-1.42052	-0.380319	-0.412158	0.0842511	0.0654139	-2.99258
622	0.0275815	0.738117	0.196697	0.0737202	0.0545014	-0.031054	-3.60141
623	-0.0610121	0.0624724	-0.254231	-0.00715932	0.0390959	0.0698635	-8.50676
624	0.51203	-0.91842	-0.0160703	-0.167381	0.0774649	0.0313541	-12.5421
625	0.00978374	-0.0330683	-0.529769	-0.00171821	0.08375	0.140293	24.292
626	0.31555	-1.88124	0.616946	-0.196228	-0.110374	0.0031628	-8.05331
627	-0.535469	-1.72288	0.154655	-0.141476	0.0516987	-1.01095	33.3973
628	0.0245577	0.618047	-0.274005	0.103817	0.0121927	-0.119029	-29.0363
629	0.000107001	-0.67945	0.24821	0.00477455	-0.0164487	-0.145602	44.1005
630	0.176302	0.677401	0.325778	0.100639	0.15509	0.0256223	84.9919
631	0.0377231	-0.0413086	-0.0440247	0.0110918	0.0630413	-0.11361	-6.94047
632	0.647098	10.6412	1.64006	-0.120418	0.44344	5.82068	-203.164
633	0.945262	2.23427	0.0270147	-0.0184299	0.0419892	-0.258218	-133.998
634	-0.118399	-0.553842	0.0384019	0.0616028	0.0505764	0.0379331	-2.82856
635	-0.0898168	-0.462419	0.23299	-0.121263	0.130244	-0.0706606	3.41311
636	-0.382585	-2.98526	-1.41907	0.127008	0.0144709	0.107079	14.8155
637	0.540309	1.91529	1.37073	-0.217498	0.126267	0.275935	-14.9955
638	0.230742	0.972867	0.330076	0.0650476	-0.0467252	-0.017229	3.33827
639	-0.119099	1.55792	0.334896	0.165582	0.0383113	0.081648	6.45569
640	0.0797219	-0.323377	-0.272153	-0.122659	0.121075	0.0857991	-5.45308
641	0.0620915	0.38327	0.00551697	-0.0679241	-0.0224639	-0.00917314	6.40629
642	0.0344117	-0.183695	-0.110627	0.0195483	0.0899082	-0.131177	-5.38821
643	0.472426	0.604712	0.327711	0.187115	-0.0745334	0.086308	0.117044
644	-0.609824	1.11034	-0.207072	-0.131209	-0.11218	-0.0068018	-1.91831
645	-0.183046	0.491662	0.148781	0.23244	0.0237419	-0.0441966	-1.07027
646	0.176171	-0.843501	-0.158164	-0.257686	0.0142453	0.0814435	2.31465
647	-0.0990323	0.14083	-0.232824	-0.0509684	-0.0102372	-0.0319285	1.77057
648	-0.0140282	0.736299	-0.232652	0.0711852	-0.101449	-0.181371	1.19193
649	-0.111863	1.07256	-0.0818253	-0.0794389	0.0862626	-0.273423	17.3442
650	-0.109364	0.0748978	0.50385	-0.30011	0.0731315	-0.10359	-2.31034
651	-0.094255	-0.684312	0.44387	0.044434	0.0729115	0.246329	0.631868
652	-0.13289	0.450554	0.487196	0.41128	-0.100557	-0.00163416	5.16658
653	0.481293	0.664025	0.0332861	0.303106	-0.0471812	0.0536497	3.30077
654	-0.574954	-2.70212	-2.9948	-0.263809	-0.204509	0.0417914	104.513
655	-0.244702	-0.327274	-0.430743	-0.253749	-0.353259	0.263733	-13.9416
656	-0.30589	-0.882416	0.396145	-0.0816839	0.102642	-0.581876	28.1291
657	-0.204087	-2.28262	1.9174	0.301668	0.374342	-2.15985	80.1787
658	0.0419019	-0.270509	0.156547	-0.0384011	0.101315	0.00198216	0.49955
659	-0.165518	1.20834	0.242868	0.0539123	-0.0411664	0.0161157	-0.116734
660	-0.459541	-0.479851	-0.273919	0.0574859	-0.0664952	0.00549271	3.84102
661	1.2189	2.1261	0.347107	0.223086	0.072668	0.452354	0
662	0.129637	0.66477	-0.00200632	0.0552363	-0.0961244	0.0697622	1.66603
663	0.22619	-0.480521	-0.156693	0.024377	0.189067	-0.0205859	2.2306
664	1.0644	-0.155756	0.286577	0.0732	0.13715	0.0327749	-1.12385
665	0.541001	-0.26329	0.477926	0.133273	0.323056	0.0182882	0.836281
666	0.0583432	0.699514	0.271282	0.20589	-0.0562962	0.0459299	-2.59436
667	0.0431955	-0.30996	0.0724806	0.0428706	-0.0314678	0.0213914	0.285971
668	0.0724587	-0.642766	-0.139192	-0.227583	0.0606007	0.149934	0.701486
669	-0.0611619	-0.0643859	-0.199696	-0.175287	-0.0143707	-0.0274946	-2.50912
670	-0.541405	-0.937057	-1.78361	-0.0304843	0.0459406	-0.159269	-7.86155
671	-0.153609	0.0629299	0.137223	0.161314	-0.12488	0.0495091	1.98199
672	0.0404577	0.314106	-0.0117641	-0.00278029	-0.0235996	0.0438974	1.14164
673	-0.122714	0.0749878	0.0851193	-0.0178183	-0.125718	0.33492	3.45475
674	0.763939	-0.274173	0.0677653	-0.0386831	0.044715	0.0317507	1.33121
675	1.13064	0.154349	0.132989	-0.10884	-0.00404862	0.0229167	0.917059
676	-0.885482	-0.5006	-0.736895	-0.0904631	-0.142275	0.164411	-1.93357
677	0.173015	-1.24001	-0.360168	-0.260709	0.025457	0.195234	3.46098
678	0.471946	-0.124546	-0.21492	0.0242201	-0.0408272	-0.0233587	0.120316
679	-0.571884	-0.82438	0.576208	-0.131408	0.0628636	-0.217803	5.51173
680	1.01954	0.337015	-0.0898847	-0.0113418	0.0527782	0.492348	0.224394
681	-0.879199	-0.668915	0.511275	0.105427	-0.0165647	-0.0289765	0.850583
682	0.253934	-0.430943	0.0585904	-0.187547	0.0749497	-0.0356441	2.45214
683	0.748863	0.234632	0.102197	-0.0285406	0.0501064	-0.202949	-0.185041
684	-0.714271	0.216236	0.148666	0.0529748	-0.190744	-0.330967	7.88103
685	0.476335	0.425975	0.021164	0.0465146	-0.0180488	-0.141713	-7.12563
686	-0.834644	-0.474217	0.0396442	-0.167491	-0.0550915	-0.25005	0.129028
687	0.0355316	0.593618	0.0954759	0.0263086	-0.0243013	0.281147	1.89319
688	0.0747003	0.0493593	-0.319756	0.00748652	-0.0368344	0.471995	0.0707606
689	-0.331323	-0.0454771	-0.313651	0.0212552	-0.0185155	-0.375767	-0.82301
690	0.134278	-0.3626	0.124177	0.325757	0.239136	0.0700595	-24.1226
691	0.139243	1.01388	0.309977	0.0880959	0.0973236	0.264346	-8.31916
692	0.235518	-1.97539	-0.302092	-0.193846	0.00311648	0.427061	-0.0214696
693	-0.0513139	-0.100213	-0.365468	0.0310664	-0.140494	0.294732	2.16813
694	0.0345025	0.225216	-0.0661042	0.00929119	-0.117129	-0.374834	-25.6297
695	0.101531	0.0112696	0.343594	-0.0411791	0.0028099	0.0877189	-7.7034
696	-0.201703	-0.930018	-0.264321	0.0638513	0.0391578	1.10462	0
697	0.536753	0.452811	0.0144878	0.21832	-0.0708478	-0.110759	18.0943
698	0.37504	0.888701	0.345703	0.181005	0.147282	-0.231573	13.1591
699	-0.375842	-0.747377	-1.07848	-0.245865	-0.228587	-0.100017	3.80973
700	-0.130576	-1.03565	0.370189	0.0257352	0.250139	-0.136441	26.2402
701	-0.158092	-0.284773	-0.0815265	-0.199224	0.0566601	0.39041	-13.522
702	0.0539819	-0.330683	0.31186	0.0568912	-0.0393211	-0.032004	-3.95579
703	0.558767	0.248239	0.209303	0.012594	0.0664929	0.254553	2.71966
704	0.575427	1.04803	0.16479	0.0621229	0.0298227	0.546555	-0.895496
705	-0.0905096	1.71652	0.913935	-0.00664354	0.28573	-0.781458	-6.94242
706	-0.341001	-0.89518	-0.135548	-0.0781364	0.0573489	-0.181141	3.85131
707	0.252891	-0.0913728	-0.0252351	-0.0205122	-0.0830523	0.0610318	1.48776
708	-0.474938	-1.5195	-0.530921	-0.0278876	-0.0897443	0.423582	-0.502332
709	0.424331	0.274636	0.0352269	0.286616	-0.0576731	-0.739731	27.4744
710	-0.708036	-2.53932	0.254115	-0.322563	0.217185	-0.198769	7.20367
711	0.0697324	0.657563	-0.00814326	0.0290421	-0.0249562	0.0481576	4.98987
712	2.73773	2.54244	0.408642	0.724915	-0.430923	-0.575939	8.82255
713	4.77904	11.4306	0.337524	2.55187	-0.754144	0.336653	-3.82923
714	0.725966	-1.46842	-0.518592	-0.0146079	-0.734344	-0.550568	-15.0678
715	0.363678	0.116273	0.856716	-0.0294258	0.0799779	-0.941656	-10.8573
716	0.442311	2.61288	0.571076	0.271889	0.0851503	0.327523	17.9707
717	-0.10451	-1.56653	-0.202584	-0.014622	-0.196514	-0.0519395	-53.917
718	-0.04648	-2.92168	0.0555544	0.0367612	0.707242	-0.135034	35.446
719	0.232284	-0.151148	-0.217715	0.0250343	0.00472747	1.19734	-35.2693
720	0.384667	0.445081	0.645066	-0.0103246	0.0933949	1.39208	31.8348
721	0.090757	0.724836	0.0398486	0.0718102	0.0798485	3.32249	231.309
722	0.0157461	-1.54112	-0.180633	-0.124415	0.0227171	5.87113	0
723	-1.09685	-0.402542	-2.3561	-0.294657	-0.290933	1.35383	-364.802
724	-0.0914224	-1.80025	0.127642	-0.266243	-0.0761891	-0.0938189	45.1072
725	0.306585	-0.444748	0.244724	-0.0716536	0.0854134	-0.271306	62.3313
726	-0.499563	0.480627	-0.298988	0.0123874	-0.0342496	-0.176758	167.398
727	-0.13213	-0.321395	-0.181828	0.109426	0.0128472	-0.542136	47.6765
728	-0.0892863	-0.287269	0.0359144	0.100798	0.00415455	-0.366222	85.092
729	0.122784	0.116931	-0.0141332	-0.0344725	-0.0902816	0.553319	-185.95
730	0.0893721	-0.237256	0.147652	0.112024	0.040936	0.00931824	-124.466
731	0.124758	0.466011	-0.0927473	-0.12643	0.0467159	0.230557	-65.4955
732	-0.0943737	-2.37692	-0.105605	-0.041228	0.12799	-0.235508	136.068
733	-0.00309278	-2.02535	0.0987465	0.278854	0.0702198	-0.165369	187.939
734	0.848826	2.72184	2.52902	0.363079	1.44477	0	-122.574
735	-0.152279	0.115837	-0.410459	-0.341395	-0.283161	0.815256	174.498
736	1.49455	2.41813	1.05615	0.56654	-0.276826	-0.115818	0.551891
737	0.374775	1.1494	0.248282	0.189783	0.0401833	0.134612	-7.16944
738	-0.348691	-2.36196	-0.684408	-0.184481	0.00205546	-0.106358	-5.98419
739	0.396042	0.205292	0.164927	0.153539	-0.032046	-0.097069	2.06328
740	-0.854436	-0.687674	-0.212779	-0.0847664	-0.102834	0.0748348	-2.22276
741	0.535097	0.400448	0.30042	0.0526132	0.0525696	0.161344	6.48453
742	-0.0601639	-0.16786	0.430565	-0.155799	0.176621	0.0587555	-5.73748
743	0.321502	-3.13508	-1.20961	0.129042	-0.646768	-0.21866	6.9738
744	-0.152954	1.36604	-0.367802	0.122881	0.0740715	-0.150774	10.3266
745	0.527154	0.6892	0.343259	0.0641715	0.0708235	0.0513302	-7.54038
746	0.306702	1.83137	0.427303	0.0332326	0.039032	0.497321	-8.37967
747	-1.2536	-3.44141	-0.852752	-0.218547	0.0197108	0.00975962	37.7907
748	0.0884053	-0.439458	0.27724	0.00413014	-0.0833193	0.241118	1.6359
749	1.14522	1.05458	0.873882	0.304783	0.0326471	0.17655	2.26318
750	0.0501537	-0.90268	-1.67898	-0.0502426	-0.293471	0.457185	18.1304
751	-1.81543	-4.2645	-2.97532	-0.532699	-0.684266	-1.57897	-0.135087
752	2.76622	-2.44873	1.69543	1.54813	-0.0933041	4.1217	2.23307
753	0.163812	0.0208541	0.297734	0.283666	0.0375045	-0.0322168	9.60062
754	-0.131949	-0.0823327	-0.135714	-0.0186273	-0.0805944	-0.224934	0
755	0.272424	1.023	0.0965628	-0.0153546	-0.229944	-0.063045	13.8608
756	0.131262	-1.4505	-0.658645	0.0473298	-0.220809	0.602609	0.8749
757	-0.21729	0.60589	-0.0783876	-0.0864987	0.155832	0.831956	1.55903
758	0.200727	4.789	1.15977	0.372664	0.229956	0.391887	3.27238
759	0.651839	1.57351	0.0597035	0.0106445	0.0619853	0.805647	9.15351
760	1.10628	5.40423	1.35624	-0.283274	-0.0834248	0.141747	1.59658
761	0.848331	8.85942	1.95075	-0.0567126	0.178618	0.361557	-5.4157
762	0.0175197	-0.272217	0.543036	0.0983912	0.11596	0.08748	-20.4165
763	0.0507434	2.32928	0.908346	0.425922	0.498157	-0.445431	-1.32221
764	0.805985	0.337112	1.31182	-0.136543	0.15344	0.925102	0
765	-1.00944	-4.75364	-1.4904	0.252439	-0.22005	0.173878	15.8132
766	-0.590531	-5.09048	-2.48414	-0.0190505	0.0796962	0.343143	6.1986
767	0.33365	0.458463	0.279437	-0.247438	-0.191154	0.310358	18.179
768	0.0448777	2.50155	0.352276	0.0923274	0.0877052	0.231999	6.91178
769	-0.437841	1.3613	0.639697	0.157196	0.479237	-1.42554	7.84987
770	0.588571	2.76834	1.36267	-0.0458104	-0.0524353	-0.373389	0.822996
771	-1.47061	-5.43725	-2.25688	-0.0333642	-0.0968524	0.0668565	-4.56642
772	0.166338	0.61621	0.775361	0.0848416	0.379876	1.29141	12.5248
773	-0.188731	-0.601495	-0.599429	0.114318	-0.0265784	1.3591	-0.0442592
774	-0.654478	0.855444	0.303609	-0.00306806	0.115238	-0.160734	8.60062
775	-2.62202	-3.34873	-2.61695	-0.601067	-0.108752	0.435216	8.47881
776	0.115148	0.34736	0.0204667	-0.35526	-0.0705714	0.583266	-1.90738
777	0.283993	0.810944	-0.803297	-0.128028	-0.0824812	0.309826	-1.80174
778	0.442817	1.12923	0.608794	0.295456	0.142291	-0.379088	-17.088
779	-0.172499	0.680753	0.511316	0.243253	0.104566	-0.134583	-52.5837
780	-0.0381874	-0.0637436	-0.258177	0.0721335	-0.0962451	-0.338058	68.7633
781	-0.269269	-0.0309377	-0.896166	0.0183358	-0.130507	-0.0779179	183.955
782	-0.339443	-0.194485	0.471648	0.134962	0.170747	0.607513	0
783	0.866494	-1.72924	0.310087	0.323572	0.187077	-0.182416	10.5414
784	-0.654434	-0.802644	0.00446342	-0.175648	0.280988	0.257918	-8.40295
785	-0.17198	-0.826869	-0.0146424	0.0651184	-0.220415	0.241323	7.90801
786	-0.284471	-1.76453	0.167434	-0.172825	-0.170304	-0.451365	12.4774
787	-0.918403	1.92422	-0.130892	0.689916	-0.155659	0.133104	15.0373
788	-1.39442	-13.9994	-2.7795	-0.199987	-0.251105	0.111081	-10.1775
789	2.82238	13.3403	5.10463	0.299938	-0.0204241	-0.201137	0
790	1.05479	2.34034	-0.276131	-0.0315548	-0.936466	-0.718575	0
791	-0.289336	-5.48296	-1.22739	-0.124094	0.0227311	-0.290078	5.77155
792	-0.0286325	2.15478	0.528481	0.211668	0.0683279	0.194803	6.46468
793	0.190215	-4.81858	-1.53065	-0.066712	-0.0465983	-0.111494	-4.29429
794	0.496388	0.455361	1.3272	0.0829035	0.140449	0.0846603	-16.8235
795	0.867439	2.13761	1.09862	0.0595042	-0.0206762	-0.00495096	13.0511
796	-0.117106	0.48522	-1.52218	0.115241	-0.284853	-0.0236138	81.0666
797	-0.0804977	0.623448	4.19929	0.642503	0.398651	-0.0619082	-237.961
798	0.245565	0.441965	-0.0965123	0.0766696	-0.150807	0.179793	0.28929
799	0.18787	-0.177278	-0.130626	0.0794179	0.0741212	-0.079802	4.69097
800	0.00492858	0.47597	0.0044597	-0.0119191	-0.174586	0.0499154	2.23234
801	-0.839494	0.767003	0.137876	-0.222143	0.050405	-0.0383081	1.15484
802	-0.440914	0.584267	0.120141	-0.0109033	0.096132	-0.0845253	-1.14562
803	-0.485699	-0.445904	0.130413	0.0843648	0.108971	-0.68483	-6.38509
804	-0.359453	0.646557	0.0202784	0.0153065	0.0232175	-0.067513	1.61637
805	-0.0351182	0.28498	-0.00646155	-0.00688313	-0.0598613	-0.206132	-0.660113
806	-0.0883211	0.0508245	-0.00872016	0.055094	-0.110056	0.0865008	0
807	0.00160351	0.0271579	-0.180587	0.0444661	0.147906	-0.147756	2.0656
808	-0.352828	-0.0548007	-0.0930567	0.101299	0.106161	-0.0314957	4.74668
809	-0.131101	1.80618	0.135669	-0.0799391	-0.0747038	-0.314383	-3.49337
810	1.14515	0.692274	0.329922	0.173384	0.386505	-0.188956	-0.748816
811	0.00917109	-2.76274	0.160815	-0.0623327	0.124315	-0.0296521	-3.71677
812	0.593178	1.13614	0.722722	0.124632	0.0802242	0.0140016	13.2495
813	-0.728498	-1.96635	-0.112197	-0.0152688	0.184993	-0.24195	-29.5434
814	0.905556	2.0774	1.31283	0.293786	-0.0284739	-0.363342	-89.0557
815	-0.640059	1.41618	1.2641	0.525877	0.463845	0.194868	73.2997
816	0.2763	0.672258	0.785615	0.357857	0.236811	-0.0478221	-1.81757
817	-3.5821	-8.63673	-4.05752	-0.689314	-0.393613	0.284531	4.4527
818	0.313094	-1.57668	1.70172	0.257896	0.389775	-0.12819	-67.3574
819	-0.373774	0.234703	-0.223859	0.0143886	-0.0112363	0.159914	81.7417
820	-0.348855	-1.04199	-1.21439	-0.197299	-0.252735	0.0480945	114.447
821	-1.58763	2.04085	-2.43542	-0.232567	-0.602126	0.917206	349.607
822	-0.432293	0.327604	0.13951	0.0296672	-0.0101586	0.0600273	-2.19836
823	0.840091	-0.758752	0.0710944	-0.323415	0.0871095	-0.0369548	4.20184
824	0.0370374	0.248838	-0.111246	0.129423	0.00215586	0.205367	-1.88963
825	-0.156767	-0.260094	0.00736794	0.0724278	0.145581	-0.43705	2.17437
826	-1.69451	0.525534	-0.953083	-0.294706	-0.338849	0.0530442	2.83926
827	0.44493	0.0410066	0.333795	0.00645983	0.0880477	-0.070965	-0.879921
828	0.104484	-0.314095	0.0870392	-0.00114995	-0.10443	0.038403	-6.19544
829	-0.35029	-1.12738	-0.735082	0.00117328	0.0231568	-0.387164	1.05379
830	1.06537	-0.877213	0.308835	-0.0390372	0.139326	-0.0911001	0.819414
831	-0.390477	-0.798479	-0.15709	-0.117191	0.134581	-0.0319851	1.53001
832	-0.740549	-0.562144	-0.393886	-0.282586	-0.0718229	0.136503	0.146368
833	0.242192	3.29032	1.18369	0.360455	0.709566	-0.471144	1.36073
834	-1.35435	1.39326	0.380653	-0.267889	0.397193	0.171652	0
835	-0.29188	0.462703	0.426035	0.145416	-0.0870089	0.0663529	1.78362
836	-0.163503	1.77272	0.619035	0.156358	-0.058137	-0.103204	2.82102
837	0.493918	2.45509	1.23708	-0.0439723	0.020373	0.0676476	1.86504
838	-0.450023	-0.438267	-0.891156	-0.25868	-0.0535327	0.505346	4.32022
839	-0.197948	0.976515	-0.00957062	-0.0230886	-0.0578239	0.0789887	2.83769
840	-2.50011	-6.94991	-7.22035	-0.381795	-0.519231	-0.0150773	-16.0505
841	0.00743127	-0.624763	-0.843433	-0.201261	-0.252621	0.0177964	1.63468
842	0.714616	-1.78137	0.470928	0.0435349	0.0323074	-0.0466643	-0.376902
843	0.144401	0.887752	-0.0240891	-0.0432171	0.040172	-0.622339	-4.39078
844	0.0343512	-0.671133	0.333791	0.023014	0.13856	-0.0758106	0.575198
845	-0.1244	-0.581299	0.11236	0.111054	-0.0393396	0.0177538	-1.09382
846	0.083127	-0.262054	-0.00157715	-0.0909303	-0.00209101	-0.113908	-14.4348
847	0.0511743	-0.785621	-0.136136	-0.0107292	-0.0717612	-0.0669951	-62.6426
848	-0.0388515	1.50104	-0.0519624	-0.11082	0.0830481	-0.17334	178.174
849	0.505146	2.43383	0.265454	0.11826	0.0478102	0.00719355	-5.45799
850	0.686953	0.73337	0.731412	-0.0118946	0.174877	0.236414	-3.05881
851	0.607794	2.33129	0.70695	0.0404228	-0.0730311	0.766639	8.67226
852	-0.0800259	-1.30162	-0.0970024	0.0936922	0.0100911	-0.348352	8.99246
853	-0.789689	2.35798	1.25466	0.257542	-0.209556	-0.0411941	-0.271445
854	2.55662	8.48478	6.29707	0.614102	0.684479	0.187184	-3.88774
855	-0.0836113	-0.103428	-0.491396	-0.187454	0.0335438	0.0762196	-2.51524
856	-0.332365	1.16366	0.308452	0.0457876	-0.164685	-0.140264	0.864764
857	-0.198508	0.470965	0.330922	0.191139	-0.228244	0.155107	-2.52981
858	-0.288974	-0.246259	-0.417519	-0.155789	-0.0332061	-0.0493168	3.97094
859	0.118016	0.408986	0.0620065	-0.205541	0.0146721	0.158933	-0.362388
860	0.0146911	-0.721636	-0.0405593	0.0613952	-0.0463699	-0.0337205	-1.21381
861	0.540084	-0.115849	0.643239	-0.0219721	0.101634	0.170765	-4.60256
862	0.222371	0.489862	-0.172144	0.000796354	-0.0236363	0.0993868	6.73993
863	0.274199	0.208079	-0.76994	0.129875	0.0163632	-0.553761	35.9732
864	-1.1613	-0.14528	-1.10123	-0.395788	0.400098	0.0402814	1.51321
865	-0.0382289	0.294299	-1.15227	-0.040587	-0.375499	0.0909717	-6.63129
866	0.0601321	-0.334266	-0.225356	-0.114718	-0.0657666	0.00529877	-38.6858
867	-0.0578692	0.721333	-0.195033	0.203678	-0.0398168	0.0556089	-0.345028
868	0.461399	-0.573106	0.598951	-0.0182058	-0.0139576	-0.0206325	-1.53628
869	0.670084	0.38318	0.863781	0.0557148	-0.0414338	0.0238191	0.0106169
870	0.030371	-1.07642	-0.12458	-0.295216	-0.0174525	0.0425135	-4.45472
871	-0.58005	-0.480875	-1.39557	-0.209737	-0.0399978	0.0196136	13.7571
872	0.320535	-0.590532	-0.0872319	-0.17674	-0.175	0.00192683	-29.6943
873	0.587041	0.239408	1.4375	0.193892	0.0917643	-0.129499	92.2322
874	-0.298196	-0.111242	-0.789161	-0.0503581	0.151532	-0.408185	0
875	0.10228	-0.288873	0.523335	-0.0562569	0.121343	-0.0378128	-5.25995
876	0.0486769	0.41775	-0.876166	0.0105126	-0.195703	0.075513	0
877	0.155338	0.212209	0.481126	0.0267227	-0.00454293	-0.0577104	-2.16737
878	-0.100427	0.266139	-0.321686	-0.0401559	-0.0122853	0.2856	0.605542
879	0.155781	0.422439	0.41622	-0.0596615	0.0131529	0.0168987	0
880	0.0929206	-1.22819	0.610564	-0.101949	0.0384652	-0.253175	0.577598
881	0.0578244	-0.410568	-0.166248	-0.0979514	-0.00707344	0.48834	1.99646
882	0.00707007	-0.00748063	0.112024	-0.60587	-0.168762	-0.0185865	-27.8704
883	0.310079	-0.322541	0.416859	-0.0843295	-0.063208	-0.000984474	-3.91297
884	0.247147	0.884721	-0.368571	0.284992	0.00165363	-0.0966759	-1.90039
885	0.311649	-1.23219	0.0826367	-0.271872	0.201918	0.0144697	-12.341
886	-0.232093	0.103572	0.0321332	-0.0159325	-0.140153	0.0989089	-29.7859
887	0.0892674	0.169793	0.00509429	-0.0603844	0.101069	0.103287	-7.71824
888	-0.00328688	-0.219853	-0.402312	-0.160083	0.202119	-0.0056268	1.22627
889	0.181017	1.51672	-0.479017	-0.701734	-0.308317	0.171741	0.490723
890	0.664691	-0.235144	0.416616	0.115953	0.0933956	0.262819	0.440581
891	-0.439526	-0.537551	0.319409	0.179778	-0.0274986	0.0594144	-0.216636
892	-0.0687798	-0.585818	-0.403678	-0.180116	-0.0444155	0.0179861	-1.21825
893	0.255148	-0.0045987	0.034057	-0.208191	-0.0474164	0.111819	0.0219204
894	0.37919	2.72784	0.39093	0.158079	-0.121994	-0.216443	-2.57398
895	-0.0856797	-1.93913	0.582802	0.39791	0.16005	-0.376945	-8.191
896	-0.383466	-4.72329	-0.980169	0.0624379	0.182385	0.400455	-13.417
897	0.0263967	1.02781	-0.102701	-0.137126	-0.0243525	0.0609756	-27.8831
898	-0.164446	-0.169011	0.0119585	0.171293	0.0163975	0.266734	-96.2197
899	-0.672109	-1.93323	-1.76613	0.167949	-0.0502526	-0.134361	5.64892
900	-1.22556	-1.65177	-0.805617	-0.44619	-0.201353	-0.20611	6.67775
901	-0.452128	0.538786	-1.633	-0.433261	-0.227336	-0.38058	0.54952
902	-0.515711	-0.286134	-0.853372	-0.364795	-0.539955	0.568245	2.3488
903	-0.318263	-3.81625	-3.3041	-2.15944	-0.243506	0.438727	-7.687
904	1.57506	8.99549	-1.78501	0.981628	-0.0287082	-0.454047	-0.0327624
905	-0.341165	0.246802	-2.19864	-3.72205	-1.19896	1.06474	15.7054
906	0.0504086	-0.341296	1.44971	0.850489	0.340209	0.0756838	1.04054
907	0.0719021	-1.57751	-0.676526	-0.0144793	0.135568	0.211054	-4.31829
908	0.468101	0.765019	0.880572	0.320098	0.0184465	0.39843	-1.89017
909	0.103802	0.109722	-0.0875006	-0.280643	-0.0276843	-1.39714	0.611746
910	0.208014	0.633594	0.320748	0.506822	-0.0874193	0.347664	-6.29196
911	0.398563	1.31959	1.67919	0.0564264	0.0505992	-0.0220393	-5.68697
912	0.0276019	-0.302904	-0.00928631	-0.164958	-0.0221995	-0.104666	0
913	-0.570533	-2.62948	0.649688	0.656017	0.0324995	0.275244	5.51356
914	-0.157819	0.773333	-1.47233	-0.776917	-0.0740836	2.58827e-05	0.895753
915	0.571008	0.321188	0.780484	0.139691	0.00547193	-0.117588	-2.12918
916	0.728909	1.88875	0.986071	0.155854	0.0892598	-0.0460534	1.26637
917	-0.172891	-0.969381	0.543157	0.0788977	0.0456966	0.22874	-1.31459
918	0.0616454	1.16056	0.780781	-0.168773	-0.0365144	-0.112553	-22.6551
919	0.784687	4.32179	0.253889	-0.0350431	0.0488224	-0.067923	-23.5131
920	0.18206	0.0886517	-0.970959	0.145636	-0.102756	-0.126103	14.8003
921	0.919806	6.45334	0.762215	0.0549491	-0.115382	0.267057	8.99264
922	-1.12462	-9.00169	0.610697	-0.174318	0.0512721	-0.296894	-3.13297
923	-1.47317	-2.67333	-1.99207	-0.442645	0.0538111	-0.0607749	19.7813
924	0.345998	-0.456621	0.779811	-0.0843893	0.08615	0.064336	-2.3819
925	-1.63572	-3.94051	-1.00242	-0.0938316	-0.00963125	0.212799	7.01512
926	0.23295	0.158287	-0.154905	-0.00133133	-0.0365108	0.0390756	16.5718
927	0.320563	0.423237	-0.397039	0.0138369	-0.185518	0.0163056	-3.47998
928	0.539473	0.531172	1.09875	-0.0356433	-0.0365901	-0.087912	21.8971
929	3.33794	1.82972	-2.97363	0.506688	-0.0835782	0.173939	68.1505
930	0.888456	0.841751	5.49378	0.035366	-0.0179146	0.23437	42.4694
931	-1.21751	-0.159167	-13.3208	-0.173779	-0.157761	0.389736	-99.2534
932	-0.282315	-1.40043	-1.86718	-0.771477	0.00701796	0.00448219	-1.39688
933	0.140266	0.0215967	-0.549206	-0.293192	0.0755558	-0.0244434	1.62887
934	0.175538	-0.245955	-0.13794	0.0630376	0.0943693	-0.0102276	2.04312
935	0.12348	-0.192373	-0.690952	-0.258186	0.0819158	-0.012321	-3.85853
936	-0.00123995	-0.425365	0.103977	0.162691	0.0401339	-0.00214338	3.57355
937	0.255648	0.315434	-0.324621	-0.031486	0.0428691	-0.185522	-6.79353
938	-0.0428828	0.148956	-0.161065	-0.225564	-0.0583267	-0.403354	7.86329
939	0.0842501	0.167939	-0.130592	0.22825	0.035026	-0.087279	4.37263
940	-0.568535	-0.25832	-0.510443	0.134189	-0.0112356	-0.0497616	0.298806
941	0.443675	-1.00526	0.533381	1.18272	0.268814	-0.0123432	0
942	0.404024	-0.399919	0.217782	0.819221	0.213395	0.116943	-0.0763373
943	0.316139	-0.997014	0.325306	0.281335	0.159364	0.244758	1.80252
944	-0.0674897	1.36118	-0.356488	-0.0169066	-0.0596183	-0.0422057	-0.303995
945	-0.138676	0.444083	-0.362699	0.0813034	0.109271	0.347902	1.48876
946	-0.31112	-0.463089	0.241731	0.137028	0.207346	-6.98e-05	-2.12648
947	0.184156	-0.207336	-0.87154	0.0268621	0.164338	0.625314	-0.745811
948	-0.172889	0.987448	1.14822	-0.308879	-0.336188	-0.417178	0.201456
949	-0.067391	0.0181781	0.389769	-0.0504925	-0.799811	-0.158242	-1.27831
950	0.116204	-0.84716	0.635597	-0.0950307	0.0518091	0.000658097	-11.1911
951	0.600972	0.881256	0.943629	0.100648	-0.0473991	0.0372615	22.5496
952	-0.0546347	0.376144	-0.0799245	-0.0249262	0.0101534	0.0744168	-61.4063
953	-0.032081	0.0206906	0.174749	-0.0285112	0.0144558	0.669861	0
954	-0.278903	-0.827281	-0.121428	-0.0380907	0.00723507	0.0345158	3.29072
955	-0.15076	-0.324115	0.189034	0.00178027	0.148505	-0.4285	5.63447
956	-0.255998	-0.883569	-0.349292	-0.111829	-0.286344	0.999152	-2.9415
957	0.0757491	-0.772515	0.275824	0.0769932	0.0973922	-2.58934	-5.91405
958	0.386543	1.22282	0.786431	-0.0176188	-0.0146366	1.22146	-0.376252
959	-0.224997	1.05078	-0.230271	0.0696211	-0.230196	-0.177295	3.06178
960	0.737352	5.42105	-0.533208	-0.0450568	-0.535887	0.0626707	-5.49152
961	0.830832	0.389995	-0.221817	0.0826851	0.185993	-0.0486888	3.53668
962	0.0191238	0.119423	0.0188782	0.0107684	0.131781	-0.00263793	1.3062
963	-0.284825	0.737429	-0.0664801	0.148763	-0.0297019	0.339364	1.98416
964	-0.0536034	0.112385	-1.24249	-0.0930548	-0.0588911	-0.558808	-1.19881
965	-0.100198	0.301398	-0.236771	-0.0837231	-0.143907	0.0198857	-1.95257
966	-0.824756	-6.23799	-2.09391	-0.121301	-0.154264	-0.161762	-2.10779
967	-0.496882	-2.97003	-0.157822	0.0976341	-0.023678	0.162254	-2.31183
968	-0.133591	-3.05281	0.328845	0.262714	0.305408	-0.0438441	-0.691957
969	0.368107	-2.10923	-0.960082	-0.031874	0.047928	-0.263283	0.650343
970	-0.480371	-3.27941	-0.82636	-0.0470376	0.020684	-0.158907	1.386
971	0.204105	0.334322	0.425299	0.0556236	-0.0209655	-0.0136842	-4.19329
972	-0.505398	-1.10411	-0.929887	-0.096907	0.0751468	0.110346	-7.37272
973	-0.265998	0.102349	-0.105842	0.0266639	-0.0229798	-0.215247	13.1275
974	0.110819	0.058842	0.0457798	0.112963	0.189868	-0.0981048	24.8137
975	-0.219057	-0.204291	-0.20627	-0.681334	-0.035309	0.102131	-2.26887
976	-0.251586	0.589951	-0.0276938	0.671656	-0.0343752	0.0308102	3.57548
977	-0.0113353	0.210172	-0.112996	0.0455283	-0.222485	0.0807072	0.209834
978	-0.449151	-0.143656	-0.409225	-0.187957	-0.0320134	0.110437	-1.96281
979	0.226559	-0.28152	0.638881	0.123896	-0.396004	-0.2781	1.00282
980	-0.0823428	-0.888328	-0.233996	0.106142	-0.425606	0.11067	3.07921
981	-0.0568274	-0.987981	0.254905	-0.130295	-0.746157	-0.0630463	0.84942
982	-0.448361	-0.0699616	-0.398742	0.0286449	-0.170576	0.0140218	0.0578171
983	0.107456	-0.635654	0.157981	-0.503084	-0.0555504	0.0156722	-0.698827
984	0.577309	-0.703131	1.21165	0.0669036	0.00612984	-0.0152793	-3.90496
985	-0.175198	0.698963	0.0624674	-0.285429	-0.669761	0.0702346	-6.48383
986	0.27005	-2.44906	0.819488	-0.122876	-0.0969933	-0.131262	-8.7241
987	-0.0156132	1.91419	0.287694	0.365697	0.274542	-0.166701	27.7504
988	-0.067045	0.185054	-0.385727	0.291455	0.195684	0.228338	4.90989
989	-0.0100779	4.39844	0.0480146	0.699775	0.416747	0.0579533	-6.89e-07
990	-0.0785222	-13.9116	-0.679688	-0.0252836	-0.0662328	0.0448715	0
991	-0.244432	-2.19941	-0.366121	0.0544675	-0.0404222	0.0296687	-2.61931
992	-0.234911	-1.6807	-0.18097	0.275377	0.530168	-0.0949235	-2.81046
993	-0.693488	3.08913	-0.133617	0.417624	-0.0651536	-0.200335	-5.55677
994	0.289493	-0.315056	0.44318	-0.568938	-0.337099	0.228875	-9.11324
995	-0.116529	0.330771	-0.090037	0.119369	0.0563666	-0.0306438	-17.7732
996	0.191598	0.148849	0.152915	0.10819	-0.0250272	0.0833043	-56.102
997	-0.0290242	-4.44758	-0.291332	-0.02304	-1.53257	-0.0539501	-0.975152
998	-1.30115	1.02658	-1.70042	0.057624	-0.108399	0.177999	1.85806
999	0.0328114	0.458508	-0.852033	-0.980415	-0.0556121	-0.204822	0.623401
1000	-0.00704468	-0.189969	-0.238329	0.310068	0.265977	-0.0704349	0
1001	-0.512676	-0.125911	-0.446082	0.15392	0.079683	0.338353	3.35372
1002	0.00318196	-0.30848	0.398034	-0.383601	-0.477418	-0.164758	-0.349974
1003	-0.102924	-0.976892	-0.537513	0.0972439	0.072128	0.0741222	-0.0140635
1004	0.103347	-1.04457	0.352436	0.0743454	0.05004	-0.215564	0.479154
1005	0.00862972	-1.6689	-0.0728503	0.0802776	0.296632	0.499298	-1.20988
1006	-0.114417	1.59727	0.374488	-0.11146	0.0301432	-0.0568511	-2.66617
1007	0.167544	-2.08551	0.359725	-0.139443	-0.122807	-0.23289	-3.78136
1008	-0.278717	-4.95914	-0.905002	-0.0472534	-0.163563	-0.152072	15.4997
1009	-0.797305	-3.9152	-1.81988	-0.124023	-0.12956	-0.0419328	65.8066
1010	-0.239582	-4.03655	0.330692	-0.0183034	0.0128245	-0.142853	-15.9393
1011	-0.498259	-0.704942	-1.00009	0.0124984	-0.0740912	0.540003	-0.416645
1012	-0.245197	0.467126	-0.378999	0.143832	-0.179632	0.0625415	1.85988
1013	-0.081488	1.06315	-0.394498	0.0709895	0.0842682	-0.0912259	-1.50225
1014	0.0786087	0.240001	-0.26814	0.122243	0.121375	-0.0305494	2.2392
1015	0.136953	-0.245663	0.135137	-0.189194	0.206236	0.0149596	-0.230426
1016	-0.0947828	-0.262683	-0.0231936	-0.196878	-0.0280646	0.0257206	0.395812
1017	-0.0714	-0.375731	-0.109068	0.206193	-0.00947847	0.118966	-0.59589
1018	-0.0556158	-0.288956	0.00676883	-0.124615	-0.0759435	0.0122579	-0.373182
1019	-0.168932	-0.236382	-1.08465	0.203515	0.18548	-0.107307	-0.813436
1020	-0.96906	0.322917	-1.09534	-1.71e-05	-0.0245242	-0.482414	0.946802
1021	-0.930315	0.437598	-0.322766	-0.190181	0.00394209	-0.0467101	6.69671
1022	-0.344444	0.327937	-0.775712	-0.149811	0.0104777	-0.0153384	-0.292386
1023	-0.106162	-0.377844	-1.05823	0.200351	0.0470011	0.0168716	0
1024	-0.699115	-1.86057	-1.48231	-0.110716	0.0741091	-0.182573	-0.362443
1025	-0.428705	-0.551426	-1.21264	-0.00369672	0.0249547	0.0299876	4.68728
1026	0.205073	1.0614	-0.0367648	0.319065	0.0930086	-0.0793005	1.06944
1027	-0.303352	-1.72984	1.46182	-0.645124	-0.249943	0.440801	-1.98176
1028	0.286825	0.0217654	0.47164	0.178784	-0.0790108	0.253293	-0.390963
1029	0.138218	0.555832	0.282834	-0.0790281	-0.173038	0.134299	4.7115
1030	-0.341091	-1.0123	-0.289119	0.0301749	-0.0350539	0.140271	-2.55162
1031	-0.313768	0.419768	0.181539	0.0203987	0.176943	0.499506	11.4454
1032	-0.43296	-1.41747	-1.35073	-0.00349546	0.272265	-0.493466	-6.55653
1033	0.420509	0.574691	0.638329	-0.0398804	0.0201667	0.945947	0.923674
1034	0.424175	1.78253	0.487699	0.0960603	0.0325145	4.10184	10.3548
1035	0.983987	1.70844	1.53472	-0.122463	-0.503952	0.167535	-3.39173
1036	-0.121538	0.141796	-0.00944045	0.06425	0.249711	-0.0226488	8.39686
1037	0.291328	0.698472	-0.506649	-0.0193304	-0.065507	-0.0403743	-0.653799
1038	0.189928	0.837897	0.882418	0.267642	0.0191817	-0.0863556	2.71958
1039	0.311233	0.470195	0.860958	0.233996	0.0324184	0.186118	1.44148
1040	-0.144998	-0.0594078	-0.265175	0.0619816	0.0159088	0.000487581	3.13319
1041	0.47033	0.63729	0.463614	0.113215	0.0807706	-0.0412719	0.636531
1042	0.234908	1.94534	1.29803	0.238376	-0.133107	0.00996572	-0.499766
1043	0.0842442	0.483374	0.0657243	0.0872357	0.11164	-0.140477	63.6749
1044	0.271336	0.0107512	0.0560285	0.00357627	0.109763	-0.182652	-1.02117
1045	-0.571298	0.222071	-0.405242	0.0501202	0.0247352	0.346812	2.77039
1046	-0.845151	-1.04214	-0.848043	0.0683895	0.0864565	-0.81002	2.17205
1047	-0.0981612	-1.15462	-0.719537	0.0908624	-0.000478359	0.234412	-0.80672
1048	0.140382	0.00141489	-0.763501	0.357549	0.143716	-0.00184651	-0.766404
1049	-0.0907226	0.843345	-0.365642	0.564723	0.0800352	0.0369325	2.04392
1050	0.00221551	-0.680867	0.565765	-1.00534	-0.380619	0.0557253	-0.406875
1051	-0.152625	-0.39257	0.198713	0.0684033	-0.154149	-0.0334063	-1.24644
1052	-0.681907	0.436659	-0.688254	0.0211048	0.0845673	0.063331	4.88088
1053	0.153215	-0.169958	0.438449	0.110448	0.0888153	0.0373501	-4.78638
1054	-0.088884	-1.24195	-0.304383	-0.0328174	-0.0572484	0.0359457	12.1766
1055	0.373118	2.45774	0.538075	-0.0133781	0.00621219	-0.275145	77.5618
1056	-0.704373	-1.12546	-0.328799	-0.0404954	0.192402	0.0715727	2.04892
1057	0.113009	-0.836267	-0.145521	0.175603	0.0157677	0.127899	0.571572
1058	0.0449294	0.359164	0.325978	0.0480276	-0.101944	-0.167992	0.181874
1059	0.160352	0.58674	0.704267	0.0953643	0.185616	-0.0323731	0.975953
1060	0.115386	-0.190045	0.201183	-0.0417894	0.27728	-0.0188181	1.63035
1061	-0.50148	-1.96864	-0.563221	-0.182701	-0.017809	0.0468185	1.93345
1062	-0.0700452	-0.554962	0.10047	-0.0476619	-0.111467	0.0326533	2.67706
1063	-0.123631	-0.506012	0.176441	-0.0611514	-0.00186961	-0.00296108	0
1064	-0.355529	-1.05254	-0.433045	-0.204011	-0.134774	0.0371934	-3.20703
1065	-0.329252	-0.93428	-0.514818	0.286683	-0.00461729	-0.100331	-0.0656794
1066	0.517167	2.9982	-0.113873	0.598682	0.0699076	-0.14523	3.17131
1067	-0.515475	-0.902611	0.237746	0.0164369	-0.00683521	0.0459639	1.69658
1068	-0.00440458	-0.398066	0.162839	-0.0361392	0.0522542	0.0119191	3.76628
1069	0.125885	-0.0785889	-0.0655817	-0.0396629	-0.0258418	-0.0714174	-0.063535
1070	-0.347717	-0.910209	-0.115537	0.098087	-0.0162469	0.0145879	2.69124
1071	0.00433492	-1.44983	0.0198791	-0.108907	-0.0110654	-0.0272567	0.505541
1072	0.0169959	-1.34809	0.365524	-0.0501108	-0.0596715	0.0768866	2.77655
1073	-0.277634	0.813273	0.39136	0.161205	0.0130301	0.0347542	2.68011
1074	0.201197	-0.290612	0.0553975	-0.115444	0.145889	0.00808732	0.245224
1075	-0.189109	-1.53105	0.133905	-0.0713899	0.167231	-0.103862	2.78645
1076	0.0711607	0.976299	0.180137	-0.0381961	0.0719009	-0.231575	-0.341706
1077	-0.111763	0.5097	-0.298289	-0.0683558	-0.039572	-0.313363	-4.82669
1078	-0.331144	-2.2939	-0.421861	0.0283568	-0.194784	0.0229635	1.18919
1079	-0.0969766	0.148747	-0.216535	0.052146	-0.0507836	-0.0452138	-2.54705
1080	0.208122	0.113443	-0.10368	-0.144029	-0.0196057	0.0272861	-2.56963
1081	0.934298	1.8857	1.42743	0.0761297	0.116809	0.0336407	0.968522
1082	0.929073	1.35278	1.00872	-0.107368	-0.0154265	0.0426429	-1.54349
1083	0.157002	0.723104	1.93878	0.0197802	-0.0138856	0.140043	2.69588
