# Supplementary material for: Lifestyles shape genome size and gene content in fungal pathogens
Source: eLife. 2025 Dec 16;14:RP104975. doi: 10.7554/eLife.104975 (PMC12707824; doi:10.7554/eLife.104975)
Supplement: Figure 2—source data 1. [file elife-104975-fig2-data1.xlsx]

## Sheet: Figure2_SourceData1
feature	Statistic_value	association_or_importance	set	Statistic
Effectors	30.6898	POSITIVE	BayesTraits_x000D_ (log Bayes factor)	logBayesFactor
Exon length	-4.14701	NO	BayesTraits_x000D_ (log Bayes factor)	logBayesFactor
GC	10.6375	NEGATIVE	BayesTraits_x000D_ (log Bayes factor)	logBayesFactor
Genes	62.2703	POSITIVE	BayesTraits_x000D_ (log Bayes factor)	logBayesFactor
Genes with introns	-3.63879	NO	BayesTraits_x000D_ (log Bayes factor)	logBayesFactor
Genome	-4.96794	NO	BayesTraits_x000D_ (log Bayes factor)	logBayesFactor
Genome w/o repeats	26.4658	POSITIVE	BayesTraits_x000D_ (log Bayes factor)	logBayesFactor
Intergenic length	21.1569	YES	BayesTraits_x000D_ (log Bayes factor)	logBayesFactor
Intron length	24.2828	YES	BayesTraits_x000D_ (log Bayes factor)	logBayesFactor
Introns	4.31606	POSITIVE	BayesTraits_x000D_ (log Bayes factor)	logBayesFactor
Pseudo tRNA	12.9359	POSITIVE	BayesTraits_x000D_ (log Bayes factor)	logBayesFactor
Repeats	28.1699	YES	BayesTraits_x000D_ (log Bayes factor)	logBayesFactor
tRNA	22.8796	POSITIVE	BayesTraits_x000D_ (log Bayes factor)	logBayesFactor
Genome	0.342845	POSITIVE	Phyloglm_x000D_ (coefficient)	Coefficient
Genome w/o repeats	1.34115	POSITIVE	Phyloglm_x000D_ (coefficient)	Coefficient
Effectors	0.738898	POSITIVE	Phyloglm_x000D_ (coefficient)	Coefficient
Genes with introns	7.29486	NO	Phyloglm_x000D_ (coefficient)	Coefficient
Repeats	-2.75382	NO	Phyloglm_x000D_ (coefficient)	Coefficient
Genes	0.351092	POSITIVE	Phyloglm_x000D_ (coefficient)	Coefficient
Exon length	-0.477687	NO	Phyloglm_x000D_ (coefficient)	Coefficient
Intergenic length	-0.0668611	NO	Phyloglm_x000D_ (coefficient)	Coefficient
Intron length	15.252	NO	Phyloglm_x000D_ (coefficient)	Coefficient
Introns	0.333509	NO	Phyloglm_x000D_ (coefficient)	Coefficient
GC	10.0792	POSITIVE	Phyloglm_x000D_ (coefficient)	Coefficient
Pseudo tRNA	2.84716	POSITIVE	Phyloglm_x000D_ (coefficient)	Coefficient
tRNA	0.546463	POSITIVE	Phyloglm_x000D_ (coefficient)	Coefficient
Effectors	0.149956	0.149956	RandomForest_x000D_ (importance)	Importance
tRNA	0.113435	0.113435	RandomForest_x000D_ (importance)	Importance
Intron length	0.108024	0.108024	RandomForest_x000D_ (importance)	Importance
Genes	0.089358	0.089358	RandomForest_x000D_ (importance)	Importance
Exon length	0.0847999	0.0847999	RandomForest_x000D_ (importance)	Importance
Intergenic length	0.0704694	0.0704694	RandomForest_x000D_ (importance)	Importance
Genes with introns	0.0693232	0.0693232	RandomForest_x000D_ (importance)	Importance
Introns	0.0639122	0.0639122	RandomForest_x000D_ (importance)	Importance
Repeats	0.0596141	0.0596141	RandomForest_x000D_ (importance)	Importance
GC	0.0562888	0.0562888	RandomForest_x000D_ (importance)	Importance
Genome w/o repeats	0.0458727	0.0458727	RandomForest_x000D_ (importance)	Importance
Pseudo tRNA	0.0454446	0.0454446	RandomForest_x000D_ (importance)	Importance
Genome	0.0435023	0.0435023	RandomForest_x000D_ (importance)	Importance
