# Supplementary material for: Lifestyles shape genome size and gene content in fungal pathogens
Source: eLife. 2025 Dec 16;14:RP104975. doi: 10.7554/eLife.104975 (PMC12707824; doi:10.7554/eLife.104975)
Supplement: Figure 2—source data 2. [file elife-104975-fig2-data2.xlsx]

## Sheet: Figure2_SourceData1_frequencies
trait	class	n	set	feature
F_intron_genes	0_0	113	nonPathogen LOW	Genes with introns
F_intron_genes	0_1	87	nonPAthogen HIGH	Genes with introns
F_intron_genes	1_0	166	Pathogen LOW	Genes with introns
F_intron_genes	1_1	193	Pathogen HIGH	Genes with introns
propGC	1_1	177	Pathogen HIGH	GC
propGC	0_0	97	nonPathogen LOW	GC
propGC	0_1	103	nonPAthogen HIGH	GC
propGC	1_0	182	Pathogen LOW	GC
effectors	1_1	215	Pathogen HIGH	Effectors
effectors	1_0	144	Pathogen LOW	Effectors
effectors	0_0	134	nonPathogen LOW	Effectors
effectors	0_1	66	nonPAthogen HIGH	Effectors
N_introns	1_1	209	Pathogen HIGH	Introns
N_introns	1_0	150	Pathogen LOW	Introns
N_introns	0_1	71	nonPAthogen HIGH	Introns
N_introns	0_0	129	nonPathogen LOW	Introns
LEN_exons	1_1	160	Pathogen HIGH	Exon length
LEN_exons	1_0	199	Pathogen LOW	Exon length
LEN_exons	0_1	120	nonPAthogen HIGH	Exon length
LEN_exons	0_0	80	nonPathogen LOW	Exon length
pseudo_tRNA	1_1	215	Pathogen HIGH	Pseudo tRNA
pseudo_tRNA	1_0	144	Pathogen LOW	Pseudo tRNA
pseudo_tRNA	0_1	107	nonPAthogen HIGH	Pseudo tRNA
pseudo_tRNA	0_0	93	nonPathogen LOW	Pseudo tRNA
frac_repeats	1_1	170	Pathogen HIGH	Repeats
frac_repeats	1_0	189	Pathogen LOW	Repeats
frac_repeats	0_1	110	nonPAthogen HIGH	Repeats
frac_repeats	0_0	90	nonPathogen LOW	Repeats
assembly_length	1_1	198	Pathogen HIGH	Genome
assembly_length	1_0	161	Pathogen LOW	Genome
assembly_length	0_1	82	nonPAthogen HIGH	Genome
assembly_length	0_0	118	nonPathogen LOW	Genome
LEN_intergenic	1_1	172	Pathogen HIGH	Intergenic length
LEN_intergenic	1_0	187	Pathogen LOW	Intergenic length
LEN_intergenic	0_1	108	nonPAthogen HIGH	Intergenic length
LEN_intergenic	0_0	92	nonPathogen LOW	Intergenic length
tRNA	1_1	216	Pathogen HIGH	tRNA
tRNA	1_0	143	Pathogen LOW	tRNA
tRNA	0_1	64	nonPAthogen HIGH	tRNA
tRNA	0_0	136	nonPathogen LOW	tRNA
genes	1_1	213	Pathogen HIGH	Genes
genes	1_0	146	Pathogen LOW	Genes
genes	0_1	67	nonPAthogen HIGH	Genes
genes	0_0	133	nonPathogen LOW	Genes
assembly_noreps	1_0	156	Pathogen LOW	Genome w/o repeats
assembly_noreps	1_1	203	Pathogen HIGH	Genome w/o repeats
assembly_noreps	0_1	77	nonPAthogen HIGH	Genome w/o repeats
assembly_noreps	0_0	123	nonPathogen LOW	Genome w/o repeats
LEN_introns	0_1	101	nonPAthogen HIGH	Intron length
LEN_introns	1_0	180	Pathogen LOW	Intron length
LEN_introns	1_1	179	Pathogen HIGH	Intron length
LEN_introns	0_0	99	nonPathogen LOW	Intron length
