# Supplementary material for: Lifestyles shape genome size and gene content in fungal pathogens
Source: eLife. 2025 Dec 16;14:RP104975. doi: 10.7554/eLife.104975 (PMC12707824; doi:10.7554/eLife.104975)
Supplement: Figure 2—source data 3. [file elife-104975-fig2-data3.xlsx]

## Sheet: Figure2_SourceData2
subset	feature	Statistic_value	association_or_rank	set	Statistic
0	Genes with introns	-1.98557	NO	BayesTraits(log Bayes factor)	logBayesFactor
0	Exon length	18.7836	POSITIVE	BayesTraits(log Bayes factor)	logBayesFactor
0	Intergenic length	25.3906	YES	BayesTraits(log Bayes factor)	logBayesFactor
0	Intron length	16.5581	NEGATIVE	BayesTraits(log Bayes factor)	logBayesFactor
0	Introns	19.7096	POSITIVE	BayesTraits(log Bayes factor)	logBayesFactor
0	Genome	5.97719	YES	BayesTraits(log Bayes factor)	logBayesFactor
0	Genome w/o repeats	22.6587	POSITIVE	BayesTraits(log Bayes factor)	logBayesFactor
0	Effectors	17.5413	POSITIVE	BayesTraits(log Bayes factor)	logBayesFactor
0	Repeats	24.8983	YES	BayesTraits(log Bayes factor)	logBayesFactor
0	Genes	29.6794	POSITIVE	BayesTraits(log Bayes factor)	logBayesFactor
0	GC	-2.77006	NO	BayesTraits(log Bayes factor)	logBayesFactor
0	Pseudo tRNA	17.1153	YES	BayesTraits(log Bayes factor)	logBayesFactor
0	tRNA	33.9376	POSITIVE	BayesTraits(log Bayes factor)	logBayesFactor
1	Genes with introns	-3.57487	NO	BayesTraits(log Bayes factor)	logBayesFactor
1	Exon length	2.44623	YES	BayesTraits(log Bayes factor)	logBayesFactor
1	Intergenic length	22.2519	YES	BayesTraits(log Bayes factor)	logBayesFactor
1	Intron length	11.6333	YES	BayesTraits(log Bayes factor)	logBayesFactor
1	Introns	23.0879	POSITIVE	BayesTraits(log Bayes factor)	logBayesFactor
1	Genome	9.58384	YES	BayesTraits(log Bayes factor)	logBayesFactor
1	Genome w/o repeats	25.64	POSITIVE	BayesTraits(log Bayes factor)	logBayesFactor
1	Effectors	19.9858	POSITIVE	BayesTraits(log Bayes factor)	logBayesFactor
1	Repeats	16.199	NEGATIVE	BayesTraits(log Bayes factor)	logBayesFactor
1	Genes	40.3525	POSITIVE	BayesTraits(log Bayes factor)	logBayesFactor
1	GC	1.96083	YES	BayesTraits(log Bayes factor)	logBayesFactor
1	Pseudo tRNA	11.8966	YES	BayesTraits(log Bayes factor)	logBayesFactor
1	tRNA	27.0997	POSITIVE	BayesTraits(log Bayes factor)	logBayesFactor
2	Genes with introns	-2.05999	NO	BayesTraits(log Bayes factor)	logBayesFactor
2	Exon length	6.15417	YES	BayesTraits(log Bayes factor)	logBayesFactor
2	Intergenic length	26.8281	YES	BayesTraits(log Bayes factor)	logBayesFactor
2	Intron length	16.1414	NEGATIVE	BayesTraits(log Bayes factor)	logBayesFactor
2	Introns	22.2346	POSITIVE	BayesTraits(log Bayes factor)	logBayesFactor
2	Genome	10.6427	YES	BayesTraits(log Bayes factor)	logBayesFactor
2	Genome w/o repeats	36.3159	POSITIVE	BayesTraits(log Bayes factor)	logBayesFactor
2	Effectors	20.9786	POSITIVE	BayesTraits(log Bayes factor)	logBayesFactor
2	Repeats	23.4806	YES	BayesTraits(log Bayes factor)	logBayesFactor
2	Genes	38.7545	POSITIVE	BayesTraits(log Bayes factor)	logBayesFactor
2	GC	-6.8606	NO	BayesTraits(log Bayes factor)	logBayesFactor
2	Pseudo tRNA	10.5126	YES	BayesTraits(log Bayes factor)	logBayesFactor
2	tRNA	17.7034	POSITIVE	BayesTraits(log Bayes factor)	logBayesFactor
3	Genes with introns	-9.73641	NO	BayesTraits(log Bayes factor)	logBayesFactor
3	Exon length	20.3774	POSITIVE	BayesTraits(log Bayes factor)	logBayesFactor
3	Intergenic length	10.4412	YES	BayesTraits(log Bayes factor)	logBayesFactor
3	Intron length	3.81378	NEGATIVE	BayesTraits(log Bayes factor)	logBayesFactor
3	Introns	27.2956	YES	BayesTraits(log Bayes factor)	logBayesFactor
3	Genome	9.35288	YES	BayesTraits(log Bayes factor)	logBayesFactor
3	Genome w/o repeats	30.7869	POSITIVE	BayesTraits(log Bayes factor)	logBayesFactor
3	Effectors	16.9673	NEGATIVE	BayesTraits(log Bayes factor)	logBayesFactor
3	Repeats	26.2594	YES	BayesTraits(log Bayes factor)	logBayesFactor
3	Genes	27.1428	POSITIVE	BayesTraits(log Bayes factor)	logBayesFactor
3	GC	-5.94498	NO	BayesTraits(log Bayes factor)	logBayesFactor
3	Pseudo tRNA	4.6982	YES	BayesTraits(log Bayes factor)	logBayesFactor
3	tRNA	20.6707	POSITIVE	BayesTraits(log Bayes factor)	logBayesFactor
4	Genes with introns	-4.91347	NO	BayesTraits(log Bayes factor)	logBayesFactor
4	Exon length	2.81196	YES	BayesTraits(log Bayes factor)	logBayesFactor
4	Intergenic length	9.64311	YES	BayesTraits(log Bayes factor)	logBayesFactor
4	Intron length	3.35386	NEGATIVE	BayesTraits(log Bayes factor)	logBayesFactor
4	Introns	25.3474	NEGATIVE	BayesTraits(log Bayes factor)	logBayesFactor
4	Genome	7.57771	YES	BayesTraits(log Bayes factor)	logBayesFactor
4	Genome w/o repeats	22.9017	POSITIVE	BayesTraits(log Bayes factor)	logBayesFactor
4	Effectors	14.5078	POSITIVE	BayesTraits(log Bayes factor)	logBayesFactor
4	Repeats	14.2748	POSITIVE	BayesTraits(log Bayes factor)	logBayesFactor
4	Genes	31.3741	POSITIVE	BayesTraits(log Bayes factor)	logBayesFactor
4	GC	-4.91111	NO	BayesTraits(log Bayes factor)	logBayesFactor
4	Pseudo tRNA	6.57082	YES	BayesTraits(log Bayes factor)	logBayesFactor
4	tRNA	23.7235	POSITIVE	BayesTraits(log Bayes factor)	logBayesFactor
5	Genes with introns	-4.50792	NO	BayesTraits(log Bayes factor)	logBayesFactor
5	Exon length	3.28248	YES	BayesTraits(log Bayes factor)	logBayesFactor
5	Intergenic length	16.4042	YES	BayesTraits(log Bayes factor)	logBayesFactor
5	Intron length	8.08608	YES	BayesTraits(log Bayes factor)	logBayesFactor
5	Introns	25.3345	POSITIVE	BayesTraits(log Bayes factor)	logBayesFactor
5	Genome	4.85361	YES	BayesTraits(log Bayes factor)	logBayesFactor
5	Genome w/o repeats	23.8579	POSITIVE	BayesTraits(log Bayes factor)	logBayesFactor
5	Effectors	12.9338	POSITIVE	BayesTraits(log Bayes factor)	logBayesFactor
5	Repeats	15.6525	YES	BayesTraits(log Bayes factor)	logBayesFactor
5	Genes	29.9839	POSITIVE	BayesTraits(log Bayes factor)	logBayesFactor
5	GC	-9.0359	NO	BayesTraits(log Bayes factor)	logBayesFactor
5	Pseudo tRNA	7.45133	YES	BayesTraits(log Bayes factor)	logBayesFactor
5	tRNA	26.4304	POSITIVE	BayesTraits(log Bayes factor)	logBayesFactor
6	Genes with introns	-3.45122	NO	BayesTraits(log Bayes factor)	logBayesFactor
6	Exon length	-1.4472	NO	BayesTraits(log Bayes factor)	logBayesFactor
6	Intergenic length	8.31632	YES	BayesTraits(log Bayes factor)	logBayesFactor
6	Intron length	5.36597	NEGATIVE	BayesTraits(log Bayes factor)	logBayesFactor
6	Introns	29.6542	POSITIVE	BayesTraits(log Bayes factor)	logBayesFactor
6	Genome	0.956987	NO	BayesTraits(log Bayes factor)	logBayesFactor
6	Genome w/o repeats	17.1297	POSITIVE	BayesTraits(log Bayes factor)	logBayesFactor
6	Effectors	6.29877	POSITIVE	BayesTraits(log Bayes factor)	logBayesFactor
6	Repeats	11.002	YES	BayesTraits(log Bayes factor)	logBayesFactor
6	Genes	27.5656	POSITIVE	BayesTraits(log Bayes factor)	logBayesFactor
6	GC	-5.26775	NO	BayesTraits(log Bayes factor)	logBayesFactor
6	Pseudo tRNA	11.7039	YES	BayesTraits(log Bayes factor)	logBayesFactor
6	tRNA	20.7369	POSITIVE	BayesTraits(log Bayes factor)	logBayesFactor
7	Genes with introns	-7.84543	NO	BayesTraits(log Bayes factor)	logBayesFactor
7	Exon length	-1.09649	NO	BayesTraits(log Bayes factor)	logBayesFactor
7	Intergenic length	13.9422	YES	BayesTraits(log Bayes factor)	logBayesFactor
7	Intron length	2.8125	YES	BayesTraits(log Bayes factor)	logBayesFactor
7	Introns	12.3972	NEGATIVE	BayesTraits(log Bayes factor)	logBayesFactor
7	Genome	0.389238	NO	BayesTraits(log Bayes factor)	logBayesFactor
7	Genome w/o repeats	16.7038	POSITIVE	BayesTraits(log Bayes factor)	logBayesFactor
7	Effectors	21.8716	POSITIVE	BayesTraits(log Bayes factor)	logBayesFactor
7	Repeats	17.0192	YES	BayesTraits(log Bayes factor)	logBayesFactor
7	Genes	27.7085	POSITIVE	BayesTraits(log Bayes factor)	logBayesFactor
7	GC	-7.17148	NO	BayesTraits(log Bayes factor)	logBayesFactor
7	Pseudo tRNA	7.28748	YES	BayesTraits(log Bayes factor)	logBayesFactor
7	tRNA	16.8435	YES	BayesTraits(log Bayes factor)	logBayesFactor
8	Genes with introns	-5.84091	NO	BayesTraits(log Bayes factor)	logBayesFactor
8	Exon length	3.08069	POSITIVE	BayesTraits(log Bayes factor)	logBayesFactor
8	Intergenic length	16.6472	YES	BayesTraits(log Bayes factor)	logBayesFactor
8	Intron length	11.9531	NEGATIVE	BayesTraits(log Bayes factor)	logBayesFactor
8	Introns	23.6992	NEGATIVE	BayesTraits(log Bayes factor)	logBayesFactor
8	Genome	2.61816	YES	BayesTraits(log Bayes factor)	logBayesFactor
8	Genome w/o repeats	21.2017	POSITIVE	BayesTraits(log Bayes factor)	logBayesFactor
8	Effectors	15.7756	POSITIVE	BayesTraits(log Bayes factor)	logBayesFactor
8	Repeats	15.1172	YES	BayesTraits(log Bayes factor)	logBayesFactor
8	Genes	26.2412	POSITIVE	BayesTraits(log Bayes factor)	logBayesFactor
8	GC	-4.99881	NO	BayesTraits(log Bayes factor)	logBayesFactor
8	Pseudo tRNA	13.2658	YES	BayesTraits(log Bayes factor)	logBayesFactor
8	tRNA	13.7632	POSITIVE	BayesTraits(log Bayes factor)	logBayesFactor
9	Genes with introns	-7.01703	NO	BayesTraits(log Bayes factor)	logBayesFactor
9	Exon length	0.855239	NO	BayesTraits(log Bayes factor)	logBayesFactor
9	Intergenic length	17.4639	YES	BayesTraits(log Bayes factor)	logBayesFactor
9	Intron length	3.15884	YES	BayesTraits(log Bayes factor)	logBayesFactor
9	Introns	16.2938	NEGATIVE	BayesTraits(log Bayes factor)	logBayesFactor
9	Genome	-7.41877	NO	BayesTraits(log Bayes factor)	logBayesFactor
9	Genome w/o repeats	15.3722	POSITIVE	BayesTraits(log Bayes factor)	logBayesFactor
9	Effectors	6.93319	YES	BayesTraits(log Bayes factor)	logBayesFactor
9	Repeats	20.3756	POSITIVE	BayesTraits(log Bayes factor)	logBayesFactor
9	Genes	25.6806	POSITIVE	BayesTraits(log Bayes factor)	logBayesFactor
9	GC	-7.08202	NO	BayesTraits(log Bayes factor)	logBayesFactor
9	Pseudo tRNA	6.96056	YES	BayesTraits(log Bayes factor)	logBayesFactor
9	tRNA	20.9434	POSITIVE	BayesTraits(log Bayes factor)	logBayesFactor
0	Genome	0.704487	POSITIVE	Phyloglm(coefficient)	Coefficient
0	Genes	0.207032	POSITIVE	Phyloglm(coefficient)	Coefficient
0	Repeats	-10.4392	NEGATIVE	Phyloglm(coefficient)	Coefficient
0	Genome w/o repeats	0.81139	POSITIVE	Phyloglm(coefficient)	Coefficient
0	GC	16.0046	POSITIVE	Phyloglm(coefficient)	Coefficient
0	Introns	0.614431	NO	Phyloglm(coefficient)	Coefficient
0	Genes with introns	4.22193	NO	Phyloglm(coefficient)	Coefficient
0	Intron length	-25.2312	NEGATIVE	Phyloglm(coefficient)	Coefficient
0	Exon length	-0.369186	NO	Phyloglm(coefficient)	Coefficient
0	Intergenic length	-1.29431	NEGATIVE	Phyloglm(coefficient)	Coefficient
0	tRNA	0.666586	POSITIVE	Phyloglm(coefficient)	Coefficient
0	Pseudo tRNA	-2.75517	NO	Phyloglm(coefficient)	Coefficient
0	Effectors	0.479635	POSITIVE	Phyloglm(coefficient)	Coefficient
1	Genome	-0.384625	NO	Phyloglm(coefficient)	Coefficient
1	Genes	0.209071	NO	Phyloglm(coefficient)	Coefficient
1	Repeats	-7.15149	NEGATIVE	Phyloglm(coefficient)	Coefficient
1	Genome w/o repeats	0.808019	POSITIVE	Phyloglm(coefficient)	Coefficient
1	GC	14.1816	POSITIVE	Phyloglm(coefficient)	Coefficient
1	Introns	-0.0711337	NO	Phyloglm(coefficient)	Coefficient
1	Genes with introns	4.17415	NO	Phyloglm(coefficient)	Coefficient
1	Intron length	-5.50939	NO	Phyloglm(coefficient)	Coefficient
1	Exon length	-0.151432	NO	Phyloglm(coefficient)	Coefficient
1	Intergenic length	-1.28578	NEGATIVE	Phyloglm(coefficient)	Coefficient
1	tRNA	0.438204	NO	Phyloglm(coefficient)	Coefficient
1	Pseudo tRNA	1.14689	NO	Phyloglm(coefficient)	Coefficient
1	Effectors	0.511076	POSITIVE	Phyloglm(coefficient)	Coefficient
2	Genome	0.806656	POSITIVE	Phyloglm(coefficient)	Coefficient
2	Genes	0.215686	POSITIVE	Phyloglm(coefficient)	Coefficient
2	Repeats	-10.5031	NEGATIVE	Phyloglm(coefficient)	Coefficient
2	Genome w/o repeats	0.84648	NO	Phyloglm(coefficient)	Coefficient
2	GC	13.1832	POSITIVE	Phyloglm(coefficient)	Coefficient
2	Introns	0.511605	NO	Phyloglm(coefficient)	Coefficient
2	Genes with introns	3.52286	NO	Phyloglm(coefficient)	Coefficient
2	Intron length	-4.1883	NO	Phyloglm(coefficient)	Coefficient
2	Exon length	-0.121616	NO	Phyloglm(coefficient)	Coefficient
2	Intergenic length	-0.964747	NEGATIVE	Phyloglm(coefficient)	Coefficient
2	tRNA	0.775356	POSITIVE	Phyloglm(coefficient)	Coefficient
2	Pseudo tRNA	1.04746	NO	Phyloglm(coefficient)	Coefficient
2	Effectors	0.511817	POSITIVE	Phyloglm(coefficient)	Coefficient
3	Genome	-0.418249	NO	Phyloglm(coefficient)	Coefficient
3	Genes	0.209573	NO	Phyloglm(coefficient)	Coefficient
3	Repeats	-9.7977	NEGATIVE	Phyloglm(coefficient)	Coefficient
3	Genome w/o repeats	0.75449	NO	Phyloglm(coefficient)	Coefficient
3	GC	13.4699	POSITIVE	Phyloglm(coefficient)	Coefficient
3	Introns	0.402726	NO	Phyloglm(coefficient)	Coefficient
3	Genes with introns	5.51563	NO	Phyloglm(coefficient)	Coefficient
3	Intron length	-8.07638	NO	Phyloglm(coefficient)	Coefficient
3	Exon length	-0.234401	NO	Phyloglm(coefficient)	Coefficient
3	Intergenic length	-0.995445	NEGATIVE	Phyloglm(coefficient)	Coefficient
3	tRNA	0.752804	POSITIVE	Phyloglm(coefficient)	Coefficient
3	Pseudo tRNA	-3.22245	NO	Phyloglm(coefficient)	Coefficient
3	Effectors	0.495365	POSITIVE	Phyloglm(coefficient)	Coefficient
4	Genome	0.767487	POSITIVE	Phyloglm(coefficient)	Coefficient
4	Genes	0.207817	NO	Phyloglm(coefficient)	Coefficient
4	Repeats	-6.31138	NEGATIVE	Phyloglm(coefficient)	Coefficient
4	Genome w/o repeats	0.789626	NO	Phyloglm(coefficient)	Coefficient
4	GC	14.2522	POSITIVE	Phyloglm(coefficient)	Coefficient
4	Introns	0.291529	NO	Phyloglm(coefficient)	Coefficient
4	Genes with introns	3.11971	NO	Phyloglm(coefficient)	Coefficient
4	Intron length	-5.25061	NO	Phyloglm(coefficient)	Coefficient
4	Exon length	-0.207752	NO	Phyloglm(coefficient)	Coefficient
4	Intergenic length	-1.34225	NEGATIVE	Phyloglm(coefficient)	Coefficient
4	tRNA	0.71952	POSITIVE	Phyloglm(coefficient)	Coefficient
4	Pseudo tRNA	1.47271	NO	Phyloglm(coefficient)	Coefficient
4	Effectors	0.521742	POSITIVE	Phyloglm(coefficient)	Coefficient
5	Genome	0.593879	POSITIVE	Phyloglm(coefficient)	Coefficient
5	Genes	0.192692	NO	Phyloglm(coefficient)	Coefficient
5	Repeats	-4.21109	NO	Phyloglm(coefficient)	Coefficient
5	Genome w/o repeats	0.79737	POSITIVE	Phyloglm(coefficient)	Coefficient
5	GC	8.70717	POSITIVE	Phyloglm(coefficient)	Coefficient
5	Introns	0.494722	NO	Phyloglm(coefficient)	Coefficient
5	Genes with introns	5.51887	NO	Phyloglm(coefficient)	Coefficient
5	Intron length	-1.72171	NO	Phyloglm(coefficient)	Coefficient
5	Exon length	-0.201839	NO	Phyloglm(coefficient)	Coefficient
5	Intergenic length	-0.842891	NEGATIVE	Phyloglm(coefficient)	Coefficient
5	tRNA	0.628665	POSITIVE	Phyloglm(coefficient)	Coefficient
5	Pseudo tRNA	1.33502	NO	Phyloglm(coefficient)	Coefficient
5	Effectors	0.49691	POSITIVE	Phyloglm(coefficient)	Coefficient
6	Genome	-0.387615	NO	Phyloglm(coefficient)	Coefficient
6	Genes	0.158874	NO	Phyloglm(coefficient)	Coefficient
6	Repeats	-9.43903	NEGATIVE	Phyloglm(coefficient)	Coefficient
6	Genome w/o repeats	0.660356	POSITIVE	Phyloglm(coefficient)	Coefficient
6	GC	14.1359	POSITIVE	Phyloglm(coefficient)	Coefficient
6	Introns	-0.235642	NO	Phyloglm(coefficient)	Coefficient
6	Genes with introns	5.9506	NO	Phyloglm(coefficient)	Coefficient
6	Intron length	22.0629	NO	Phyloglm(coefficient)	Coefficient
6	Exon length	-0.12782	NO	Phyloglm(coefficient)	Coefficient
6	Intergenic length	-1.11833	NEGATIVE	Phyloglm(coefficient)	Coefficient
6	tRNA	0.590404	POSITIVE	Phyloglm(coefficient)	Coefficient
6	Pseudo tRNA	1.57453	NO	Phyloglm(coefficient)	Coefficient
6	Effectors	0.417157	POSITIVE	Phyloglm(coefficient)	Coefficient
7	Genome	-0.495326	NEGATIVE	Phyloglm(coefficient)	Coefficient
7	Genes	0.204903	POSITIVE	Phyloglm(coefficient)	Coefficient
7	Repeats	-9.07688	NEGATIVE	Phyloglm(coefficient)	Coefficient
7	Genome w/o repeats	0.827231	POSITIVE	Phyloglm(coefficient)	Coefficient
7	GC	14.548	POSITIVE	Phyloglm(coefficient)	Coefficient
7	Introns	0.654876	NO	Phyloglm(coefficient)	Coefficient
7	Genes with introns	6.58603	NO	Phyloglm(coefficient)	Coefficient
7	Intron length	-3.66657	NO	Phyloglm(coefficient)	Coefficient
7	Exon length	-0.262807	NO	Phyloglm(coefficient)	Coefficient
7	Intergenic length	-1.00475	NEGATIVE	Phyloglm(coefficient)	Coefficient
7	tRNA	0.735381	POSITIVE	Phyloglm(coefficient)	Coefficient
7	Pseudo tRNA	1.35693	NO	Phyloglm(coefficient)	Coefficient
7	Effectors	0.503614	POSITIVE	Phyloglm(coefficient)	Coefficient
8	Genome	0.655373	POSITIVE	Phyloglm(coefficient)	Coefficient
8	Genes	0.183984	NO	Phyloglm(coefficient)	Coefficient
8	Repeats	-9.66292	NEGATIVE	Phyloglm(coefficient)	Coefficient
8	Genome w/o repeats	0.749852	POSITIVE	Phyloglm(coefficient)	Coefficient
8	GC	13.7504	POSITIVE	Phyloglm(coefficient)	Coefficient
8	Introns	3.38222	NO	Phyloglm(coefficient)	Coefficient
8	Genes with introns	6.30555	NO	Phyloglm(coefficient)	Coefficient
8	Intron length	-1.31031	NO	Phyloglm(coefficient)	Coefficient
8	Exon length	-0.227825	NO	Phyloglm(coefficient)	Coefficient
8	Intergenic length	-1.28593	NEGATIVE	Phyloglm(coefficient)	Coefficient
8	tRNA	0.661793	POSITIVE	Phyloglm(coefficient)	Coefficient
8	Pseudo tRNA	-2.54004	NO	Phyloglm(coefficient)	Coefficient
8	Effectors	0.437593	POSITIVE	Phyloglm(coefficient)	Coefficient
9	Genome	-0.125288	NO	Phyloglm(coefficient)	Coefficient
9	Genes	0.183542	NO	Phyloglm(coefficient)	Coefficient
9	Repeats	-9.75351	NEGATIVE	Phyloglm(coefficient)	Coefficient
9	Genome w/o repeats	0.768365	POSITIVE	Phyloglm(coefficient)	Coefficient
9	GC	14.9443	POSITIVE	Phyloglm(coefficient)	Coefficient
9	Introns	0.400495	NO	Phyloglm(coefficient)	Coefficient
9	Genes with introns	4.23003	NO	Phyloglm(coefficient)	Coefficient
9	Intron length	-1.08206	NO	Phyloglm(coefficient)	Coefficient
9	Exon length	-0.201517	NO	Phyloglm(coefficient)	Coefficient
9	Intergenic length	-1.32546	NEGATIVE	Phyloglm(coefficient)	Coefficient
9	tRNA	0.400288	NO	Phyloglm(coefficient)	Coefficient
9	Pseudo tRNA	-2.38151	NO	Phyloglm(coefficient)	Coefficient
9	Effectors	0.488959	POSITIVE	Phyloglm(coefficient)	Coefficient
0	Genes with introns	0.0126437	5	RandomForest(importance)	Importance
0	Exon length	0.00854801	10	RandomForest(importance)	Importance
0	Intergenic length	0.0174849	3	RandomForest(importance)	Importance
0	Intron length	0.0104728	9	RandomForest(importance)	Importance
0	Introns	0.00726622	15	RandomForest(importance)	Importance
0	Genome	0.0110763	6	RandomForest(importance)	Importance
0	Genome w/o repeats	0.00783477	14	RandomForest(importance)	Importance
0	Effectors	0.0257738	1	RandomForest(importance)	Importance
0	Repeats	0.0109263	7	RandomForest(importance)	Importance
0	Genes	0.0105657	8	RandomForest(importance)	Importance
0	GC	0.0197455	2	RandomForest(importance)	Importance
0	Pseudo tRNA	0.00854526	11	RandomForest(importance)	Importance
0	tRNA	0.0137708	4	RandomForest(importance)	Importance
1	Genes with introns	0.0219708	3	RandomForest(importance)	Importance
1	Exon length	0.0156649	8	RandomForest(importance)	Importance
1	Intergenic length	0.0208544	5	RandomForest(importance)	Importance
1	Intron length	0.0218592	4	RandomForest(importance)	Importance
1	Introns	0.00975424	13	RandomForest(importance)	Importance
1	Genome	0.0145548	9	RandomForest(importance)	Importance
1	Genome w/o repeats	0.0144397	10	RandomForest(importance)	Importance
1	Effectors	0.0303684	1	RandomForest(importance)	Importance
1	Repeats	0.0135549	12	RandomForest(importance)	Importance
1	Genes	0.0206009	6	RandomForest(importance)	Importance
1	GC	0.0231025	2	RandomForest(importance)	Importance
1	Pseudo tRNA	0.0138448	11	RandomForest(importance)	Importance
1	tRNA	0.020103	7	RandomForest(importance)	Importance
2	Genes with introns	0.0375963	2	RandomForest(importance)	Importance
2	Exon length	0.0179988	9	RandomForest(importance)	Importance
2	Intergenic length	0.0269453	4	RandomForest(importance)	Importance
2	Intron length	0.022777	5	RandomForest(importance)	Importance
2	Introns	0.0151126	11	RandomForest(importance)	Importance
2	Genome	0.0125922	13	RandomForest(importance)	Importance
2	Genome w/o repeats	0.0152179	10	RandomForest(importance)	Importance
2	Effectors	0.0311178	3	RandomForest(importance)	Importance
2	Repeats	0.0210452	7	RandomForest(importance)	Importance
2	Genes	0.0209761	8	RandomForest(importance)	Importance
2	GC	0.0217912	6	RandomForest(importance)	Importance
2	Pseudo tRNA	0.0142741	12	RandomForest(importance)	Importance
2	tRNA	0.0581877	1	RandomForest(importance)	Importance
3	Genes with introns	0.0272196	3	RandomForest(importance)	Importance
3	Exon length	0.0200496	5	RandomForest(importance)	Importance
3	Intergenic length	0.0189141	8	RandomForest(importance)	Importance
3	Intron length	0.0148963	9	RandomForest(importance)	Importance
3	Introns	0.0279462	2	RandomForest(importance)	Importance
3	Genome	0.0106221	13	RandomForest(importance)	Importance
3	Genome w/o repeats	0.0124695	12	RandomForest(importance)	Importance
3	Effectors	0.0251992	4	RandomForest(importance)	Importance
3	Repeats	0.0192174	7	RandomForest(importance)	Importance
3	Genes	0.0141281	10	RandomForest(importance)	Importance
3	GC	0.0200278	6	RandomForest(importance)	Importance
3	Pseudo tRNA	0.013755	11	RandomForest(importance)	Importance
3	tRNA	0.0373828	1	RandomForest(importance)	Importance
4	Genes with introns	0.0177259	9	RandomForest(importance)	Importance
4	Exon length	0.0181861	7	RandomForest(importance)	Importance
4	Intergenic length	0.0270494	3	RandomForest(importance)	Importance
4	Intron length	0.0177488	8	RandomForest(importance)	Importance
4	Introns	0.0102782	13	RandomForest(importance)	Importance
4	Genome	0.00857828	15	RandomForest(importance)	Importance
4	Genome w/o repeats	0.011004	11	RandomForest(importance)	Importance
4	Effectors	0.0386662	2	RandomForest(importance)	Importance
4	Repeats	0.0191467	6	RandomForest(importance)	Importance
4	Genes	0.0229037	5	RandomForest(importance)	Importance
4	GC	0.0231503	4	RandomForest(importance)	Importance
4	Pseudo tRNA	0.0160297	10	RandomForest(importance)	Importance
4	tRNA	0.0448257	1	RandomForest(importance)	Importance
5	Genes with introns	0.0265604	3	RandomForest(importance)	Importance
5	Exon length	0.0286965	2	RandomForest(importance)	Importance
5	Intergenic length	0.0192166	5	RandomForest(importance)	Importance
5	Intron length	0.0243029	4	RandomForest(importance)	Importance
5	Introns	0.014737	8	RandomForest(importance)	Importance
5	Genome	0.00738992	13	RandomForest(importance)	Importance
5	Genome w/o repeats	0.0113383	11	RandomForest(importance)	Importance
5	Effectors	0.0353824	1	RandomForest(importance)	Importance
5	Repeats	0.00939396	12	RandomForest(importance)	Importance
5	Genes	0.018718	6	RandomForest(importance)	Importance
5	GC	0.0118455	10	RandomForest(importance)	Importance
5	Pseudo tRNA	0.0127348	9	RandomForest(importance)	Importance
5	tRNA	0.0181932	7	RandomForest(importance)	Importance
6	Genes with introns	0.025534	4	RandomForest(importance)	Importance
6	Exon length	0.0136201	9	RandomForest(importance)	Importance
6	Intergenic length	0.0211349	5	RandomForest(importance)	Importance
6	Intron length	0.0275595	3	RandomForest(importance)	Importance
6	Introns	0.0132097	10	RandomForest(importance)	Importance
6	Genome	0.00778799	14	RandomForest(importance)	Importance
6	Genome w/o repeats	0.0127215	11	RandomForest(importance)	Importance
6	Effectors	0.036747	1	RandomForest(importance)	Importance
6	Repeats	0.0193864	6	RandomForest(importance)	Importance
6	Genes	0.0172716	7	RandomForest(importance)	Importance
6	GC	0.0163577	8	RandomForest(importance)	Importance
6	Pseudo tRNA	0.0107714	12	RandomForest(importance)	Importance
6	tRNA	0.028914	2	RandomForest(importance)	Importance
7	Intergenic length	0.0155861	6	RandomForest(importance)	Importance
7	Intron length	0.0123091	12	RandomForest(importance)	Importance
7	Introns	0.00824396	17	RandomForest(importance)	Importance
7	Genome w/o repeats	0.0119705	13	RandomForest(importance)	Importance
7	Effectors	0.05582	1	RandomForest(importance)	Importance
7	Genes	0.0176009	4	RandomForest(importance)	Importance
7	tRNA	0.0332746	2	RandomForest(importance)	Importance
8	Genes with introns	0.008561	11	RandomForest(importance)	Importance
8	Intergenic length	0.0207305	2	RandomForest(importance)	Importance
8	Intron length	0.0119915	7	RandomForest(importance)	Importance
8	Introns	0.0110733	8	RandomForest(importance)	Importance
8	Effectors	0.0254113	1	RandomForest(importance)	Importance
8	Repeats	0.00745767	14	RandomForest(importance)	Importance
8	Genes	0.0196301	3	RandomForest(importance)	Importance
8	GC	0.0132577	5	RandomForest(importance)	Importance
8	tRNA	0.0190123	4	RandomForest(importance)	Importance
9	Genes with introns	0.0313343	4	RandomForest(importance)	Importance
9	Exon length	0.013373	11	RandomForest(importance)	Importance
9	Intergenic length	0.0226591	6	RandomForest(importance)	Importance
9	Intron length	0.0127212	12	RandomForest(importance)	Importance
9	Introns	0.0162789	8	RandomForest(importance)	Importance
9	Genome	0.00938614	13	RandomForest(importance)	Importance
9	Genome w/o repeats	0.0147109	10	RandomForest(importance)	Importance
9	Effectors	0.0449712	1	RandomForest(importance)	Importance
9	Repeats	0.0151834	9	RandomForest(importance)	Importance
9	Genes	0.0269725	5	RandomForest(importance)	Importance
9	GC	0.031378	3	RandomForest(importance)	Importance
9	Pseudo tRNA	0.0164948	7	RandomForest(importance)	Importance
9	tRNA	0.0372212	2	RandomForest(importance)	Importance
