# Supplementary material for: Lifestyles shape genome size and gene content in fungal pathogens
Source: eLife. 2025 Dec 16;14:RP104975. doi: 10.7554/eLife.104975 (PMC12707824; doi:10.7554/eLife.104975)
Supplement: Figure 2—source data 4. [file elife-104975-fig2-data4.xlsx]

## Sheet: Figure2_SourceData3
index	trait	type	fraction	count	rate	feature	BF
00_01	assembly_length	Gain	0.0629	1258	mean_logBF_q12.q21	Genome	-2.20155
00_01	assembly_length	Loss	0.00465	93	mean_logBF_q12.q21	Genome	-2.20155
00_01	assembly_length	No change	0.93245	18649	mean_logBF_q12.q21	Genome	-2.20155
10_11	assembly_length	Gain	0.06095	1219	mean_logBF_q34.q43	Genome	-1.81045
10_11	assembly_length	No change	0.92445	18489	mean_logBF_q34.q43	Genome	-1.81045
10_11	assembly_length	Loss	0.0146	292	mean_logBF_q34.q43	Genome	-1.81045
01_11	assembly_length	Gain	0.00965	193	mean_logBF_q24.q42	Genome	-2.93382
01_11	assembly_length	No change	0.96755	19351	mean_logBF_q24.q42	Genome	-2.93382
01_11	assembly_length	Loss	0.0228	456	mean_logBF_q24.q42	Genome	-2.93382
00_10	assembly_length	Gain	0.00325	65	mean_logBF_q13.q31	Genome	-1.27444
00_10	assembly_length	No change	0.59475	11895	mean_logBF_q13.q31	Genome	-1.27444
00_10	assembly_length	Loss	0.402	8040	mean_logBF_q13.q31	Genome	-1.27444
00_01	genes	Gain	0.00355	71	mean_logBF_q12.q21	Genes	-3.53136
00_01	genes	No change	0.99505	19901	mean_logBF_q12.q21	Genes	-3.53136
00_01	genes	Loss	0.0014	28	mean_logBF_q12.q21	Genes	-3.53136
10_11	genes	Gain	0.9747	19494	mean_logBF_q34.q43	Genes	17.634
10_11	genes	No change	0	0	mean_logBF_q34.q43	Genes	17.634
10_11	genes	Loss	0.0253	506	mean_logBF_q34.q43	Genes	17.634
01_11	genes	Gain	0.00055	11	mean_logBF_q24.q42	Genes	-3.22092
01_11	genes	No change	0.99095	19819	mean_logBF_q24.q42	Genes	-3.22092
01_11	genes	Loss	0.0085	170	mean_logBF_q24.q42	Genes	-3.22092
00_10	genes	Gain	0	0	mean_logBF_q13.q31	Genes	9.85915
00_10	genes	No change	0.0019	38	mean_logBF_q13.q31	Genes	9.85915
00_10	genes	Loss	0.9981	19962	mean_logBF_q13.q31	Genes	9.85915
00_01	effectors	Gain	0.003	60	mean_logBF_q12.q21	Effectors	-3.52343
00_01	effectors	No change	0.994	19880	mean_logBF_q12.q21	Effectors	-3.52343
00_01	effectors	Loss	0.003	60	mean_logBF_q12.q21	Effectors	-3.52343
10_11	effectors	Gain	0.97015	19403	mean_logBF_q34.q43	Effectors	23.2483
10_11	effectors	No change	0	0	mean_logBF_q34.q43	Effectors	23.2483
10_11	effectors	Loss	0.02985	597	mean_logBF_q34.q43	Effectors	23.2483
01_11	effectors	Gain	0.00205	41	mean_logBF_q24.q42	Effectors	-2.62052
01_11	effectors	No change	0.9856	19712	mean_logBF_q24.q42	Effectors	-2.62052
01_11	effectors	Loss	0.01235	247	mean_logBF_q24.q42	Effectors	-2.62052
00_10	effectors	No change	0.4151	8302	mean_logBF_q13.q31	Effectors	-0.338355
00_10	effectors	Gain	0.00145	29	mean_logBF_q13.q31	Effectors	-0.338355
00_10	effectors	Loss	0.58345	11669	mean_logBF_q13.q31	Effectors	-0.338355
00_01	assembly_noreps	Loss	0.00165	33	mean_logBF_q12.q21	Genome w/o repeats	-2.61933
00_01	assembly_noreps	No change	0.9879	19758	mean_logBF_q12.q21	Genome w/o repeats	-2.61933
00_01	assembly_noreps	Gain	0.01045	209	mean_logBF_q12.q21	Genome w/o repeats	-2.61933
10_11	assembly_noreps	Loss	0.02155	431	mean_logBF_q34.q43	Genome w/o repeats	9.87905
10_11	assembly_noreps	Gain	0.9768	19536	mean_logBF_q34.q43	Genome w/o repeats	9.87905
10_11	assembly_noreps	No change	0.00165	33	mean_logBF_q34.q43	Genome w/o repeats	9.87905
01_11	assembly_noreps	Gain	0.00285	57	mean_logBF_q24.q42	Genome w/o repeats	-2.57012
01_11	assembly_noreps	Loss	0.01545	309	mean_logBF_q24.q42	Genome w/o repeats	-2.57012
01_11	assembly_noreps	No change	0.9817	19634	mean_logBF_q24.q42	Genome w/o repeats	-2.57012
00_10	assembly_noreps	Gain	0	0	mean_logBF_q13.q31	Genome w/o repeats	8.77226
00_10	assembly_noreps	No change	0.00795	159	mean_logBF_q13.q31	Genome w/o repeats	8.77226
00_10	assembly_noreps	Loss	0.99205	19841	mean_logBF_q13.q31	Genome w/o repeats	8.77226
00_01	N_introns	Gain	0.0018	36	mean_logBF_q12.q21	Introns	-2.23658
00_01	N_introns	Loss	0.0209	418	mean_logBF_q12.q21	Introns	-2.23658
00_01	N_introns	No change	0.9773	19546	mean_logBF_q12.q21	Introns	-2.23658
10_11	N_introns	Gain	0.95265	19053	mean_logBF_q34.q43	Introns	6.29111
10_11	N_introns	No change	0.00785	157	mean_logBF_q34.q43	Introns	6.29111
10_11	N_introns	Loss	0.0395	790	mean_logBF_q34.q43	Introns	6.29111
01_11	N_introns	Gain	0.00015	3	mean_logBF_q24.q42	Introns	1.41356
01_11	N_introns	Loss	0.91735	18347	mean_logBF_q24.q42	Introns	1.41356
01_11	N_introns	No change	0.0825	1650	mean_logBF_q24.q42	Introns	1.41356
00_10	N_introns	Gain	0.0051	102	mean_logBF_q13.q31	Introns	-0.788235
00_10	N_introns	No change	0.893	17860	mean_logBF_q13.q31	Introns	-0.788235
00_10	N_introns	Loss	0.1019	2038	mean_logBF_q13.q31	Introns	-0.788235
00_01	tRNA	Gain	0.0026	52	mean_logBF_q12.q21	tRNA	-3.63306
00_01	tRNA	Loss	0.0042	84	mean_logBF_q12.q21	tRNA	-3.63306
00_01	tRNA	No change	0.9932	19864	mean_logBF_q12.q21	tRNA	-3.63306
10_11	tRNA	Gain	0.70095	14019	mean_logBF_q34.q43	tRNA	10.3138
10_11	tRNA	No change	0.0022	44	mean_logBF_q34.q43	tRNA	10.3138
10_11	tRNA	Loss	0.29685	5937	mean_logBF_q34.q43	tRNA	10.3138
01_11	tRNA	Gain	0.00195	39	mean_logBF_q24.q42	tRNA	-3.50707
01_11	tRNA	Loss	0.01645	329	mean_logBF_q24.q42	tRNA	-3.50707
01_11	tRNA	No change	0.9816	19632	mean_logBF_q24.q42	tRNA	-3.50707
00_10	tRNA	Gain	0	0	mean_logBF_q13.q31	tRNA	8.85648
00_10	tRNA	No change	0.0015	30	mean_logBF_q13.q31	tRNA	8.85648
00_10	tRNA	Loss	0.9985	19970	mean_logBF_q13.q31	tRNA	8.85648
00_01	pseudo_tRNA	No change	0.98015	19603	mean_logBF_q12.q21	Pseudo tRNA	-2.14027
00_01	pseudo_tRNA	Loss	0.01255	251	mean_logBF_q12.q21	Pseudo tRNA	-2.14027
00_01	pseudo_tRNA	Gain	0.0073	146	mean_logBF_q12.q21	Pseudo tRNA	-2.14027
10_11	pseudo_tRNA	No change	0.02945	589	mean_logBF_q34.q43	Pseudo tRNA	4.95752
10_11	pseudo_tRNA	Loss	0.1105	2210	mean_logBF_q34.q43	Pseudo tRNA	4.95752
10_11	pseudo_tRNA	Gain	0.86005	17201	mean_logBF_q34.q43	Pseudo tRNA	4.95752
01_11	pseudo_tRNA	Loss	0.08705	1741	mean_logBF_q24.q42	Pseudo tRNA	3.53793
01_11	pseudo_tRNA	Gain	0.84245	16849	mean_logBF_q24.q42	Pseudo tRNA	3.53793
01_11	pseudo_tRNA	No change	0.0705	1410	mean_logBF_q24.q42	Pseudo tRNA	3.53793
00_10	pseudo_tRNA	Loss	0.03075	615	mean_logBF_q13.q31	Pseudo tRNA	-1.66314
00_10	pseudo_tRNA	Gain	0.0499	998	mean_logBF_q13.q31	Pseudo tRNA	-1.66314
00_10	pseudo_tRNA	No change	0.91935	18387	mean_logBF_q13.q31	Pseudo tRNA	-1.66314
00_01	frac_repeats	Gain	0.62275	12455	mean_logBF_q12.q21	Repeats	4.07827
00_01	frac_repeats	No change	0.0062	124	mean_logBF_q12.q21	Repeats	4.07827
00_01	frac_repeats	Loss	0.37105	7421	mean_logBF_q12.q21	Repeats	4.07827
10_11	frac_repeats	No change	0.0244	488	mean_logBF_q34.q43	Repeats	3.5461
10_11	frac_repeats	Gain	0.0023	46	mean_logBF_q34.q43	Repeats	3.5461
10_11	frac_repeats	Loss	0.9733	19466	mean_logBF_q34.q43	Repeats	3.5461
01_11	frac_repeats	Gain	0.9792	19584	mean_logBF_q24.q42	Repeats	3.20902
01_11	frac_repeats	No change	0.00235	47	mean_logBF_q24.q42	Repeats	3.20902
01_11	frac_repeats	Loss	0.01845	369	mean_logBF_q24.q42	Repeats	3.20902
00_10	frac_repeats	No change	0.12545	2509	mean_logBF_q13.q31	Repeats	2.40222
00_10	frac_repeats	Gain	0.00505	101	mean_logBF_q13.q31	Repeats	2.40222
00_10	frac_repeats	Loss	0.8695	17390	mean_logBF_q13.q31	Repeats	2.40222
00_01	LEN_introns	Gain	0.1455	2910	mean_logBF_q12.q21	Intron length	-1.64191
00_01	LEN_introns	No change	0.8407	16814	mean_logBF_q12.q21	Intron length	-1.64191
00_01	LEN_introns	Loss	0.0138	276	mean_logBF_q12.q21	Intron length	-1.64191
10_11	LEN_introns	No change	0.98685	19737	mean_logBF_q34.q43	Intron length	-3.71525
10_11	LEN_introns	Gain	0.0106	212	mean_logBF_q34.q43	Intron length	-3.71525
10_11	LEN_introns	Loss	0.00255	51	mean_logBF_q34.q43	Intron length	-3.71525
01_11	LEN_introns	Gain	0.6172	12344	mean_logBF_q24.q42	Intron length	-2.30425
01_11	LEN_introns	No change	0.38245	7649	mean_logBF_q24.q42	Intron length	-2.30425
01_11	LEN_introns	Loss	0.00035	7	mean_logBF_q24.q42	Intron length	-2.30425
00_10	LEN_introns	No change	0.2578	5156	mean_logBF_q13.q31	Intron length	0.0795167
00_10	LEN_introns	Gain	0.73395	14679	mean_logBF_q13.q31	Intron length	0.0795167
00_10	LEN_introns	Loss	0.00825	165	mean_logBF_q13.q31	Intron length	0.0795167
00_01	propGC	Gain	0.00425	85	mean_logBF_q12.q21	GC	-0.557559
00_01	propGC	No change	0.3955	7910	mean_logBF_q12.q21	GC	-0.557559
00_01	propGC	Loss	0.60025	12005	mean_logBF_q12.q21	GC	-0.557559
10_11	propGC	No change	0.5743	11486	mean_logBF_q34.q43	GC	-0.147894
10_11	propGC	Gain	0.42535	8507	mean_logBF_q34.q43	GC	-0.147894
10_11	propGC	Loss	0.00035	7	mean_logBF_q34.q43	GC	-0.147894
01_11	propGC	No change	0.9492	18984	mean_logBF_q24.q42	GC	-2.57146
01_11	propGC	Loss	0.0086	172	mean_logBF_q24.q42	GC	-2.57146
01_11	propGC	Gain	0.0422	844	mean_logBF_q24.q42	GC	-2.57146
00_10	propGC	Loss	0	0	mean_logBF_q13.q31	GC	7.25968
00_10	propGC	No change	0.0076	152	mean_logBF_q13.q31	GC	7.25968
00_10	propGC	Gain	0.9924	19848	mean_logBF_q13.q31	GC	7.25968
00_01	LEN_intergenic	Gain	0.63595	12719	mean_logBF_q12.q21	Intergenic length	1.07569
00_01	LEN_intergenic	Loss	0.1784	3568	mean_logBF_q12.q21	Intergenic length	1.07569
00_01	LEN_intergenic	No change	0.18565	3713	mean_logBF_q12.q21	Intergenic length	1.07569
10_11	LEN_intergenic	Gain	0.0024	48	mean_logBF_q34.q43	Intergenic length	-2.52743
10_11	LEN_intergenic	No change	0.9926	19852	mean_logBF_q34.q43	Intergenic length	-2.52743
10_11	LEN_intergenic	Loss	0.005	100	mean_logBF_q34.q43	Intergenic length	-2.52743
01_11	LEN_intergenic	Gain	0.0104	208	mean_logBF_q24.q42	Intergenic length	-2.67473
01_11	LEN_intergenic	No change	0.9885	19770	mean_logBF_q24.q42	Intergenic length	-2.67473
01_11	LEN_intergenic	Loss	0.0011	22	mean_logBF_q24.q42	Intergenic length	-2.67473
00_10	LEN_intergenic	Gain	0.01355	271	mean_logBF_q13.q31	Intergenic length	-1.78542
00_10	LEN_intergenic	No change	0.98355	19671	mean_logBF_q13.q31	Intergenic length	-1.78542
00_10	LEN_intergenic	Loss	0.0029	58	mean_logBF_q13.q31	Intergenic length	-1.78542
00_01	F_intron_genes	Gain	0.0222	444	mean_logBF_q12.q21	Genes with introns	-0.977653
00_01	F_intron_genes	No change	0.95665	19133	mean_logBF_q12.q21	Genes with introns	-0.977653
00_01	F_intron_genes	Loss	0.02115	423	mean_logBF_q12.q21	Genes with introns	-0.977653
10_11	F_intron_genes	Gain	0.0483	966	mean_logBF_q34.q43	Genes with introns	-1.75438
10_11	F_intron_genes	No change	0.949	18980	mean_logBF_q34.q43	Genes with introns	-1.75438
10_11	F_intron_genes	Loss	0.0027	54	mean_logBF_q34.q43	Genes with introns	-1.75438
01_11	F_intron_genes	Gain	0.01925	385	mean_logBF_q24.q42	Genes with introns	-2.04566
01_11	F_intron_genes	No change	0.9767	19534	mean_logBF_q24.q42	Genes with introns	-2.04566
01_11	F_intron_genes	Loss	0.00405	81	mean_logBF_q24.q42	Genes with introns	-2.04566
00_10	F_intron_genes	Gain	0.0138	276	mean_logBF_q13.q31	Genes with introns	-1.87196
00_10	F_intron_genes	No change	0.9634	19268	mean_logBF_q13.q31	Genes with introns	-1.87196
00_10	F_intron_genes	Loss	0.0228	456	mean_logBF_q13.q31	Genes with introns	-1.87196
00_01	LEN_exons	Gain	0.4554	9108	mean_logBF_q12.q21	Exon length	-1.50693
00_01	LEN_exons	No change	0.52605	10521	mean_logBF_q12.q21	Exon length	-1.50693
00_01	LEN_exons	Loss	0.01855	371	mean_logBF_q12.q21	Exon length	-1.50693
10_11	LEN_exons	Gain	0.0184	368	mean_logBF_q34.q43	Exon length	-1.84433
10_11	LEN_exons	No change	0.9773	19546	mean_logBF_q34.q43	Exon length	-1.84433
10_11	LEN_exons	Loss	0.0043	86	mean_logBF_q34.q43	Exon length	-1.84433
01_11	LEN_exons	Gain	0.00235	47	mean_logBF_q24.q42	Exon length	-3.65718
01_11	LEN_exons	No change	0.9884	19768	mean_logBF_q24.q42	Exon length	-3.65718
01_11	LEN_exons	Loss	0.00925	185	mean_logBF_q24.q42	Exon length	-3.65718
00_10	LEN_exons	No change	0.2225	4450	mean_logBF_q13.q31	Exon length	0.338629
00_10	LEN_exons	Gain	0.77005	15401	mean_logBF_q13.q31	Exon length	0.338629
00_10	LEN_exons	Loss	0.00745	149	mean_logBF_q13.q31	Exon length	0.338629
