# Supplementary material for: Lifestyles shape genome size and gene content in fungal pathogens
Source: eLife. 2025 Dec 16;14:RP104975. doi: 10.7554/eLife.104975 (PMC12707824; doi:10.7554/eLife.104975)
Supplement: Figure 3—source data 1. [file elife-104975-fig3-data1.xlsx]

## Sheet: Figure3_SourceData1
feature	Statistic_value	association_or_importance	set	Statistic
Effectors	0.751247	NO	BayesTraits (log Bayes factor)	logBayesFactor
Exon length	32.1116	POSITIVE	BayesTraits (log Bayes factor)	logBayesFactor
GC	10.3082	POSITIVE	BayesTraits (log Bayes factor)	logBayesFactor
Genes	-4.01788	NO	BayesTraits (log Bayes factor)	logBayesFactor
Genes with introns	9.17449	YES	BayesTraits (log Bayes factor)	logBayesFactor
Genome	12.9388	NEGATIVE	BayesTraits (log Bayes factor)	logBayesFactor
Genome w/o repeats	14.1236	NEGATIVE	BayesTraits (log Bayes factor)	logBayesFactor
Intergenic length	0.401006	NO	BayesTraits (log Bayes factor)	logBayesFactor
Intron length	-3.28431	NO	BayesTraits (log Bayes factor)	logBayesFactor
Introns	11.9534	YES	BayesTraits (log Bayes factor)	logBayesFactor
Pseudo tRNA	14.8712	NEGATIVE	BayesTraits (log Bayes factor)	logBayesFactor
Repeats	3.08643	POSITIVE	BayesTraits (log Bayes factor)	logBayesFactor
tRNA	-5.11772	NO	BayesTraits (log Bayes factor)	logBayesFactor
Genome	-0.33478	NEGATIVE	Phyloglm (coefficient)	Coefficient
Genes	-0.260188	NEGATIVE	Phyloglm (coefficient)	Coefficient
Repeats	-1.56475	NO	Phyloglm (coefficient)	Coefficient
Genome w/o repeats	-0.397997	NO	Phyloglm (coefficient)	Coefficient
GC	4.92555	NO	Phyloglm (coefficient)	Coefficient
Introns	-1.5289	NO	Phyloglm (coefficient)	Coefficient
Genes with introns	-22.4464	NEGATIVE	Phyloglm (coefficient)	Coefficient
Intron length	14.5883	NO	Phyloglm (coefficient)	Coefficient
Exon length	1.9228	POSITIVE	Phyloglm (coefficient)	Coefficient
Intergenic length	-0.394063	NO	Phyloglm (coefficient)	Coefficient
tRNA	-0.213125	NO	Phyloglm (coefficient)	Coefficient
Pseudo tRNA	-2.39305	NO	Phyloglm (coefficient)	Coefficient
Effectors	-0.197131	NO	Phyloglm (coefficient)	Coefficient
Exon length	0.203929	0.203929	RandomForest (importance)	Importance
Genome w/o repeats	0.101323	0.101323	RandomForest (importance)	Importance
Intron length	0.100689	0.100689	RandomForest (importance)	Importance
Introns	0.0979268	0.0979268	RandomForest (importance)	Importance
Effectors	0.079152	0.079152	RandomForest (importance)	Importance
tRNA	0.0718204	0.0718204	RandomForest (importance)	Importance
Genes	0.0684073	0.0684073	RandomForest (importance)	Importance
Intergenic length	0.0682886	0.0682886	RandomForest (importance)	Importance
Genome	0.0515789	0.0515789	RandomForest (importance)	Importance
GC	0.049378	0.049378	RandomForest (importance)	Importance
Genes with introns	0.0433424	0.0433424	RandomForest (importance)	Importance
Repeats	0.0389733	0.0389733	RandomForest (importance)	Importance
Pseudo tRNA	0.0251915	0.0251915	RandomForest (importance)	Importance
