# Supplementary material for: Lifestyles shape genome size and gene content in fungal pathogens
Source: eLife. 2025 Dec 16;14:RP104975. doi: 10.7554/eLife.104975 (PMC12707824; doi:10.7554/eLife.104975)
Supplement: Figure 3—source data 2. [file elife-104975-fig3-data2.xlsx]

## Sheet: Figure3_SourceData1_frequencies
trait	class	n	set	feature
F_intron_genes	no_0	190	nonInsectAssoc LOW	Genes with introns
F_intron_genes	no_1	234	nonInsectAssoc HIGH	Genes with introns
F_intron_genes	yes_0	90	InsectAssoc LOW	Genes with introns
F_intron_genes	yes_1	46	InsectAssoc HIGH	Genes with introns
propGC	yes_1	96	InsectAssoc HIGH	GC
propGC	no_0	240	nonInsectAssoc LOW	GC
propGC	no_1	184	nonInsectAssoc HIGH	GC
propGC	yes_0	40	InsectAssoc LOW	GC
effectors	yes_1	27	InsectAssoc HIGH	Effectors
effectors	yes_0	109	InsectAssoc LOW	Effectors
effectors	no_0	169	nonInsectAssoc LOW	Effectors
effectors	no_1	255	nonInsectAssoc HIGH	Effectors
N_introns	yes_1	35	InsectAssoc HIGH	Introns
N_introns	yes_0	101	InsectAssoc LOW	Introns
N_introns	no_1	245	nonInsectAssoc HIGH	Introns
N_introns	no_0	179	nonInsectAssoc LOW	Introns
LEN_exons	yes_1	113	InsectAssoc HIGH	Exon length
LEN_exons	yes_0	23	InsectAssoc LOW	Exon length
LEN_exons	no_1	167	nonInsectAssoc HIGH	Exon length
LEN_exons	no_0	257	nonInsectAssoc LOW	Exon length
pseudo_tRNA	yes_1	53	InsectAssoc HIGH	Pseudo tRNA
pseudo_tRNA	yes_0	83	InsectAssoc LOW	Pseudo tRNA
pseudo_tRNA	no_1	270	nonInsectAssoc HIGH	Pseudo tRNA
pseudo_tRNA	no_0	154	nonInsectAssoc LOW	Pseudo tRNA
frac_repeats	yes_1	92	InsectAssoc HIGH	Repeats
frac_repeats	yes_0	44	InsectAssoc LOW	Repeats
frac_repeats	no_1	188	nonInsectAssoc HIGH	Repeats
frac_repeats	no_0	236	nonInsectAssoc LOW	Repeats
assembly_length	yes_1	29	InsectAssoc HIGH	Genome
assembly_length	yes_0	107	InsectAssoc LOW	Genome
assembly_length	no_1	251	nonInsectAssoc HIGH	Genome
assembly_length	no_0	173	nonInsectAssoc LOW	Genome
LEN_intergenic	yes_1	64	InsectAssoc HIGH	Intergenic length
LEN_intergenic	yes_0	72	InsectAssoc LOW	Intergenic length
LEN_intergenic	no_1	216	nonInsectAssoc HIGH	Intergenic length
LEN_intergenic	no_0	208	nonInsectAssoc LOW	Intergenic length
tRNA	yes_1	35	InsectAssoc HIGH	tRNA
tRNA	yes_0	101	InsectAssoc LOW	tRNA
tRNA	no_1	245	nonInsectAssoc HIGH	tRNA
tRNA	no_0	179	nonInsectAssoc LOW	tRNA
genes	yes_1	30	InsectAssoc HIGH	Genes
genes	yes_0	106	InsectAssoc LOW	Genes
genes	no_1	250	nonInsectAssoc HIGH	Genes
genes	no_0	174	nonInsectAssoc LOW	Genes
assembly_noreps	yes_0	108	InsectAssoc LOW	Genome w/o repeats
assembly_noreps	yes_1	28	InsectAssoc HIGH	Genome w/o repeats
assembly_noreps	no_1	252	nonInsectAssoc HIGH	Genome w/o repeats
assembly_noreps	no_0	172	nonInsectAssoc LOW	Genome w/o repeats
LEN_introns	no_1	177	nonInsectAssoc HIGH	Intron length
LEN_introns	yes_0	33	InsectAssoc LOW	Intron length
LEN_introns	yes_1	103	InsectAssoc HIGH	Intron length
LEN_introns	no_0	247	nonInsectAssoc LOW	Intron length
