# Supplementary material for: Lifestyles shape genome size and gene content in fungal pathogens
Source: eLife. 2025 Dec 16;14:RP104975. doi: 10.7554/eLife.104975 (PMC12707824; doi:10.7554/eLife.104975)
Supplement: Figure 3—source data 3. [file elife-104975-fig3-data3.xlsx]

## Sheet: Figure3_SourceData2
ortholog	node	group	pair	n_introns	intron_length	exon_length	n_exons
OG0003747	D	non-IA	P1	2.03226	84.586	743.621	3.03226
OG0003747	M1	IA	P2	2.07692	97.7115	734.208	3.07692
OG0003747	M2	non-IA	P2	2	82.1429	748	3
OG0003747	O	IA	P1	1.92683	116.896	862.997	2.92683
OG0003749	D	non-IA	P1	1.74194	158.419	1922.25	2.74194
OG0003749	M1	IA	P2	0.615385	40.7885	3192.38	1.61538
OG0003749	M2	non-IA	P2	0.714286	88	2743.93	1.71429
OG0003749	O	IA	P1	0.707317	65.752	3174.01	1.70732
OG0003756	D	non-IA	P1	1.29032	115.38	524.194	2.29032
OG0003756	M1	IA	P2	0.961538	100.462	417.635	1.96154
OG0003756	M2	non-IA	P2	0.857143	104.714	464.786	1.85714
OG0003756	O	IA	P1	1.04878	79.378	426.846	2.04878
OG0003757	D	non-IA	P1	3.3871	117.732	439.083	4.3871
OG0003757	M1	IA	P2	1.88462	172.849	602.723	2.88462
OG0003757	M2	non-IA	P2	2.85714	84.5357	405.564	3.85714
OG0003757	O	IA	P1	2.4878	99.5118	801.532	3.4878
OG0003766	D	non-IA	P1	4.09677	168.176	342.176	5.09677
OG0003766	M1	IA	P2	3.69231	120.503	373.558	4.69231
OG0003766	M2	non-IA	P2	4	93.1429	345	5
OG0003766	O	IA	P1	1.90244	68.4634	769.806	2.90244
OG0003775	D	non-IA	P1	1.22581	114.007	1138.65	2.22581
OG0003775	M1	IA	P2	0.807692	72.1923	1337.31	1.80769
OG0003775	M2	non-IA	P2	1	79.2857	1107.86	2
OG0003775	O	IA	P1	1.09756	154.539	1079.04	2.09756
OG0003786	D	non-IA	P1	1.03226	247.806	389.258	2.03226
OG0003786	M1	IA	P2	1	369.769	396.75	2
OG0003786	M2	non-IA	P2	1.28571	185.429	374.929	2.28571
OG0003786	O	IA	P1	1.41463	189.939	378.293	2.41463
OG0003805	D	non-IA	P1	1.25806	90.6129	944.355	2.25806
OG0003805	M1	IA	P2	1.11538	116.385	951.269	2.11538
OG0003805	M2	non-IA	P2	1	78.8571	994.5	2
OG0003805	O	IA	P1	1.12195	82.5772	1087.99	2.12195
OG0003810	D	non-IA	P1	5.70968	73.1495	454.226	6.70968
OG0003810	M1	IA	P2	2.53846	80.2853	851.219	3.53846
OG0003810	M2	non-IA	P2	5.42857	85.581	464.435	6.42857
OG0003810	O	IA	P1	3.19512	79.2134	808.146	4.19512
OG0003814	D	non-IA	P1	1	88.9355	423.968	2
OG0003814	M1	IA	P2	1	107.385	415.673	2
OG0003814	M2	non-IA	P2	1	113.143	417.429	2
OG0003814	O	IA	P1	0.0243902	1.63415	833.159	1.02439
OG0003833	D	non-IA	P1	1.3871	150.273	790.835	2.3871
OG0003833	M1	IA	P2	1.03846	139.731	808.962	2.03846
OG0003833	M2	non-IA	P2	1	172.429	794.357	2
OG0003833	O	IA	P1	2.39024	102.456	924.435	3.39024
OG0003836	D	non-IA	P1	1.90323	133.661	545.097	2.90323
OG0003836	M1	IA	P2	1.92308	160.192	525.538	2.92308
OG0003836	M2	non-IA	P2	2	165.571	505.286	3
OG0003836	O	IA	P1	1.90244	145.101	576.433	2.90244
OG0003847	D	non-IA	P1	1.06452	79.9032	627.605	2.06452
OG0003847	M1	IA	P2	1.92308	71.2179	444.327	2.92308
OG0003847	M2	non-IA	P2	2	73.0714	421.857	3
OG0003847	O	IA	P1	1.31707	97.8801	648.837	2.31707
OG0003848	D	non-IA	P1	2.03226	95.5296	622.341	3.03226
OG0003848	M1	IA	P2	2.07692	93.9487	540.942	3.07692
OG0003848	M2	non-IA	P2	1.71429	82.5714	625.714	2.71429
OG0003848	O	IA	P1	1.63415	74.5935	727.171	2.63415
OG0003860	D	non-IA	P1	2.3871	113.42	315.173	3.3871
OG0003860	M1	IA	P2	1.96154	81.9038	352.038	2.96154
OG0003860	M2	non-IA	P2	1.42857	100.071	435.929	2.42857
OG0003860	O	IA	P1	1.60976	63.3049	423.274	2.60976
OG0003869	D	non-IA	P1	2.12903	88.7258	292.503	3.12903
OG0003869	M1	IA	P2	0.961538	70.3462	482.712	1.96154
OG0003869	M2	non-IA	P2	0.857143	73	528	1.85714
OG0003869	O	IA	P1	1.09756	86.4837	440.543	2.09756
OG0003870	D	non-IA	P1	4.06452	68.8253	487.443	5.06452
OG0003870	M1	IA	P2	1.84615	80.2692	880.827	2.84615
OG0003870	M2	non-IA	P2	4	65.5714	495.343	5
OG0003870	O	IA	P1	2.85366	69.3841	668.756	3.85366
OG0003882	D	non-IA	P1	1.67742	116.806	483.732	2.67742
OG0003882	M1	IA	P2	0.384615	25.6154	777.635	1.38462
OG0003882	M2	non-IA	P2	0.857143	48.5714	701.714	1.85714
OG0003882	O	IA	P1	1.36585	80.7886	533.268	2.36585
OG0003886	D	non-IA	P1	1.09677	90.8065	2040.52	2.09677
OG0003886	M1	IA	P2	0.884615	77.391	2116.42	1.88462
OG0003886	M2	non-IA	P2	1.28571	134.333	1622.04	2.28571
OG0003886	O	IA	P1	1.34146	106.008	1680.67	2.34146
OG0003895	D	non-IA	P1	3.16129	74.5548	710.111	4.16129
OG0003895	M1	IA	P2	2.03846	104.218	948.942	3.03846
OG0003895	M2	non-IA	P2	3	81.0476	719.679	4
OG0003895	O	IA	P1	2.78049	74.7297	779.524	3.78049
OG0003897	D	non-IA	P1	2.6129	159.75	345.663	3.6129
OG0003897	M1	IA	P2	2.73077	160.779	322.74	3.73077
OG0003897	M2	non-IA	P2	3.14286	172.964	310.329	4.14286
OG0003897	O	IA	P1	2.19512	230.421	450.606	3.19512
OG0003898	D	non-IA	P1	4.25806	129.599	602.312	5.25806
OG0003898	M1	IA	P2	1.88462	102.865	1000.95	2.88462
OG0003898	M2	non-IA	P2	3	94.0476	683.893	4
OG0003898	O	IA	P1	2.90244	81.2608	806.031	3.90244
OG0003902	D	non-IA	P1	4.19355	126.089	372.52	5.19355
OG0003902	M1	IA	P2	1.96154	120.327	480.673	2.96154
OG0003902	M2	non-IA	P2	2	83.3571	479.571	3
OG0003902	O	IA	P1	2	97.1439	520.318	3
OG0003903	D	non-IA	P1	4.77419	155.831	149.182	5.77419
OG0003903	M1	IA	P2	4.03846	144.676	141.544	5.03846
OG0003903	M2	non-IA	P2	3.85714	160.44	126.15	4.85714
OG0003903	O	IA	P1	3.2439	185.283	159.691	4.2439
OG0003906	D	non-IA	P1	6.90323	76.8957	433.351	7.90323
OG0003906	M1	IA	P2	6.84615	101.713	433.393	7.84615
OG0003906	M2	non-IA	P2	8.85714	92.5952	331.116	9.85714
OG0003906	O	IA	P1	5.29268	87.1596	584.4	6.29268
OG0003910	D	non-IA	P1	3.45161	92.0656	383.044	4.45161
OG0003910	M1	IA	P2	3.23077	131.968	396.864	4.23077
OG0003910	M2	non-IA	P2	4.14286	77.8571	425.143	5.14286
OG0003910	O	IA	P1	3.85366	108.045	379.609	4.85366
