# Supplementary material for: Lifestyles shape genome size and gene content in fungal pathogens
Source: eLife. 2025 Dec 16;14:RP104975. doi: 10.7554/eLife.104975 (PMC12707824; doi:10.7554/eLife.104975)
Supplement: Figure 3—source data 4. [file elife-104975-fig3-data4.xlsx]

## Sheet: Figure3_SourceData3
ogID	n_species	trait	clade	Trait	Value
OG0000000	42	IA	O	Exon length (bp)	1224.11
OG0000001	40	IA	O	Exon length (bp)	1377.69
OG0000002	42	IA	O	Exon length (bp)	341.836
OG0000003	38	IA	O	Exon length (bp)	1018.15
OG0000004	42	IA	O	Exon length (bp)	582.284
OG0000005	42	IA	O	Exon length (bp)	1852.2
OG0000006	42	IA	O	Exon length (bp)	482.611
OG0000007	42	IA	O	Exon length (bp)	633.814
OG0000008	40	IA	O	Exon length (bp)	426.531
OG0000009	39	IA	O	Exon length (bp)	192.448
OG0000010	42	IA	O	Exon length (bp)	500.485
OG0000011	42	IA	O	Exon length (bp)	678.133
OG0000012	42	IA	O	Exon length (bp)	871.994
OG0000013	42	IA	O	Exon length (bp)	1389.71
OG0000014	42	IA	O	Exon length (bp)	490.932
OG0000015	42	IA	O	Exon length (bp)	912.784
OG0000017	42	IA	O	Exon length (bp)	694.597
OG0000018	32	IA	O	Exon length (bp)	652.519
OG0000019	41	IA	O	Exon length (bp)	389.452
OG0000020	41	IA	O	Exon length (bp)	711.982
OG0000021	42	IA	O	Exon length (bp)	364.739
OG0000022	42	IA	O	Exon length (bp)	613.58
OG0000023	42	IA	O	Exon length (bp)	609.279
OG0000024	40	IA	O	Exon length (bp)	894.39
OG0000025	29	IA	O	Exon length (bp)	1031.6
OG0000026	35	IA	O	Exon length (bp)	809.121
OG0000027	42	IA	O	Exon length (bp)	596.96
OG0000028	38	IA	O	Exon length (bp)	782.918
OG0000029	42	IA	O	Exon length (bp)	427.527
OG0000031	14	IA	O	Exon length (bp)	3343.07
OG0000032	25	IA	O	Exon length (bp)	344.968
OG0000033	42	IA	O	Exon length (bp)	767.421
OG0000034	42	IA	O	Exon length (bp)	671.288
OG0000035	42	IA	O	Exon length (bp)	714.236
OG0000037	41	IA	O	Exon length (bp)	985.516
OG0000038	38	IA	O	Exon length (bp)	412.01
OG0000039	42	IA	O	Exon length (bp)	510.149
OG0000040	42	IA	O	Exon length (bp)	580.999
OG0000041	42	IA	O	Exon length (bp)	761.834
OG0000042	37	IA	O	Exon length (bp)	1013.14
OG0000043	42	IA	O	Exon length (bp)	449.779
OG0000044	42	IA	O	Exon length (bp)	526.199
OG0000045	38	IA	O	Exon length (bp)	406.743
OG0000046	41	IA	O	Exon length (bp)	586.056
OG0000047	29	IA	O	Exon length (bp)	372.495
OG0000048	41	IA	O	Exon length (bp)	615.374
OG0000049	42	IA	O	Exon length (bp)	523.51
OG0000050	41	IA	O	Exon length (bp)	861.296
OG0000051	34	IA	O	Exon length (bp)	622.396
OG0000052	42	IA	O	Exon length (bp)	533.841
OG0000053	42	IA	O	Exon length (bp)	981.01
OG0000054	42	IA	O	Exon length (bp)	1191.69
OG0000055	25	IA	O	Exon length (bp)	527.603
OG0000056	42	IA	O	Exon length (bp)	2358.25
OG0000057	25	IA	O	Exon length (bp)	392.131
OG0000058	42	IA	O	Exon length (bp)	907.962
OG0000059	39	IA	O	Exon length (bp)	684.689
OG0000060	42	IA	O	Exon length (bp)	873.746
OG0000062	40	IA	O	Exon length (bp)	302.959
OG0000063	10	IA	O	Exon length (bp)	562.712
OG0000064	42	IA	O	Exon length (bp)	613.245
OG0000065	42	IA	O	Exon length (bp)	799.276
OG0000066	39	IA	O	Exon length (bp)	981.624
OG0000067	13	IA	O	Exon length (bp)	597.234
OG0000068	30	IA	O	Exon length (bp)	454.796
OG0000069	42	IA	O	Exon length (bp)	596.769
OG0000070	42	IA	O	Exon length (bp)	353.522
OG0000071	42	IA	O	Exon length (bp)	636.402
OG0000072	42	IA	O	Exon length (bp)	614.59
OG0000073	37	IA	O	Exon length (bp)	650.942
OG0000074	23	IA	O	Exon length (bp)	470.787
OG0000075	42	IA	O	Exon length (bp)	1198.15
OG0000076	38	IA	O	Exon length (bp)	720.582
OG0000077	28	IA	O	Exon length (bp)	1007.81
OG0000078	38	IA	O	Exon length (bp)	484.24
OG0000079	26	IA	O	Exon length (bp)	661.861
OG0000080	31	IA	O	Exon length (bp)	575.155
OG0000081	42	IA	O	Exon length (bp)	763.146
OG0000082	41	IA	O	Exon length (bp)	792.485
OG0000084	42	IA	O	Exon length (bp)	1009.5
OG0000085	41	IA	O	Exon length (bp)	930.839
OG0000086	30	IA	O	Exon length (bp)	476.009
OG0000087	41	IA	O	Exon length (bp)	941.324
OG0000088	40	IA	O	Exon length (bp)	1371.23
OG0000089	30	IA	O	Exon length (bp)	499.687
OG0000090	36	IA	O	Exon length (bp)	1406.89
OG0000091	42	IA	O	Exon length (bp)	886.023
OG0000092	42	IA	O	Exon length (bp)	766.977
OG0000093	42	IA	O	Exon length (bp)	702.387
OG0000094	41	IA	O	Exon length (bp)	1014.22
OG0000095	42	IA	O	Exon length (bp)	878.653
OG0000096	40	IA	O	Exon length (bp)	485.874
OG0000097	40	IA	O	Exon length (bp)	364.134
OG0000098	42	IA	O	Exon length (bp)	521.001
OG0000099	30	IA	O	Exon length (bp)	789.705
OG0000100	41	IA	O	Exon length (bp)	803.63
OG0000102	39	IA	O	Exon length (bp)	938.72
OG0000103	26	IA	O	Exon length (bp)	771.881
OG0000104	42	IA	O	Exon length (bp)	994.261
OG0000106	42	IA	O	Exon length (bp)	883.576
OG0000107	42	IA	O	Exon length (bp)	989.443
OG0000108	42	IA	O	Exon length (bp)	926.262
OG0000109	35	IA	O	Exon length (bp)	677.493
OG0000110	42	IA	O	Exon length (bp)	699.439
OG0000112	10	IA	O	Exon length (bp)	378.6
OG0000113	30	IA	O	Exon length (bp)	1302.35
OG0000115	42	IA	O	Exon length (bp)	376.419
OG0000117	39	IA	O	Exon length (bp)	461.388
OG0000118	42	IA	O	Exon length (bp)	521.985
OG0000119	30	IA	O	Exon length (bp)	462.421
OG0000120	42	IA	O	Exon length (bp)	858.884
OG0000121	42	IA	O	Exon length (bp)	904.587
OG0000122	42	IA	O	Exon length (bp)	722.405
OG0000123	42	IA	O	Exon length (bp)	1199.78
OG0000124	42	IA	O	Exon length (bp)	304.549
OG0000125	42	IA	O	Exon length (bp)	1639.7
OG0000126	42	IA	O	Exon length (bp)	1114.39
OG0000127	42	IA	O	Exon length (bp)	706.173
OG0000128	35	IA	O	Exon length (bp)	425.584
OG0000129	35	IA	O	Exon length (bp)	569
OG0000130	41	IA	O	Exon length (bp)	599.203
OG0000131	40	IA	O	Exon length (bp)	2675.39
OG0000132	42	IA	O	Exon length (bp)	1439.93
OG0000133	40	IA	O	Exon length (bp)	692.546
OG0000134	32	IA	O	Exon length (bp)	789.392
OG0000135	42	IA	O	Exon length (bp)	886.584
OG0000136	42	IA	O	Exon length (bp)	1030.39
OG0000137	42	IA	O	Exon length (bp)	646.948
OG0000138	42	IA	O	Exon length (bp)	340.021
OG0000140	42	IA	O	Exon length (bp)	834.035
OG0000141	31	IA	O	Exon length (bp)	433.434
OG0000142	42	IA	O	Exon length (bp)	945.707
OG0000143	39	IA	O	Exon length (bp)	831.837
OG0000144	40	IA	O	Exon length (bp)	810.153
OG0000145	38	IA	O	Exon length (bp)	603.686
OG0000146	41	IA	O	Exon length (bp)	935.207
OG0000149	39	IA	O	Exon length (bp)	681.183
OG0000150	30	IA	O	Exon length (bp)	305.13
OG0000151	35	IA	O	Exon length (bp)	852.619
OG0000152	40	IA	O	Exon length (bp)	506.249
OG0000153	26	IA	O	Exon length (bp)	656.354
OG0000154	18	IA	O	Exon length (bp)	678.583
OG0000155	39	IA	O	Exon length (bp)	527.624
OG0000156	42	IA	O	Exon length (bp)	811.708
OG0000157	42	IA	O	Exon length (bp)	207.98
OG0000158	38	IA	O	Exon length (bp)	572.903
OG0000159	37	IA	O	Exon length (bp)	1440.58
OG0000160	42	IA	O	Exon length (bp)	410.969
OG0000161	42	IA	O	Exon length (bp)	370.429
OG0000162	42	IA	O	Exon length (bp)	1304.77
OG0000163	42	IA	O	Exon length (bp)	174.422
OG0000164	39	IA	O	Exon length (bp)	664.03
OG0000165	42	IA	O	Exon length (bp)	667.356
OG0000166	38	IA	O	Exon length (bp)	941.453
OG0000167	36	IA	O	Exon length (bp)	398.897
OG0000168	42	IA	O	Exon length (bp)	753.737
OG0000169	42	IA	O	Exon length (bp)	680.777
OG0000170	20	IA	O	Exon length (bp)	557.591
OG0000171	42	IA	O	Exon length (bp)	968.093
OG0000172	31	IA	O	Exon length (bp)	1299.92
OG0000173	30	IA	O	Exon length (bp)	518.067
OG0000176	42	IA	O	Exon length (bp)	1630.86
OG0000177	42	IA	O	Exon length (bp)	1006.53
OG0000178	42	IA	O	Exon length (bp)	416.05
OG0000179	42	IA	O	Exon length (bp)	1336.5
OG0000180	32	IA	O	Exon length (bp)	868.506
OG0000181	6	IA	O	Exon length (bp)	695.083
OG0000182	36	IA	O	Exon length (bp)	1153
OG0000183	42	IA	O	Exon length (bp)	494.483
OG0000185	28	IA	O	Exon length (bp)	1289.37
OG0000186	42	IA	O	Exon length (bp)	862.085
OG0000187	42	IA	O	Exon length (bp)	714.466
OG0000188	39	IA	O	Exon length (bp)	280.034
OG0000189	39	IA	O	Exon length (bp)	863.519
OG0000190	42	IA	O	Exon length (bp)	1520.38
OG0000191	42	IA	O	Exon length (bp)	415.768
OG0000192	42	IA	O	Exon length (bp)	157.639
OG0000193	42	IA	O	Exon length (bp)	974.832
OG0000194	42	IA	O	Exon length (bp)	1354.29
OG0000195	42	IA	O	Exon length (bp)	964.832
OG0000196	42	IA	O	Exon length (bp)	686.76
OG0000197	42	IA	O	Exon length (bp)	731.989
OG0000198	40	IA	O	Exon length (bp)	645.491
OG0000199	25	IA	O	Exon length (bp)	922.885
OG0000200	41	IA	O	Exon length (bp)	647.521
OG0000201	42	IA	O	Exon length (bp)	656.461
OG0000202	41	IA	O	Exon length (bp)	1821.72
OG0000204	32	IA	O	Exon length (bp)	1028.05
OG0000205	40	IA	O	Exon length (bp)	653.272
OG0000206	40	IA	O	Exon length (bp)	1092.61
OG0000207	42	IA	O	Exon length (bp)	484.26
OG0000208	39	IA	O	Exon length (bp)	526.592
OG0000209	42	IA	O	Exon length (bp)	626.234
OG0000210	35	IA	O	Exon length (bp)	984.976
OG0000212	42	IA	O	Exon length (bp)	823.595
OG0000213	42	IA	O	Exon length (bp)	336.068
OG0000214	34	IA	O	Exon length (bp)	1173.17
OG0000215	42	IA	O	Exon length (bp)	612.396
OG0000216	42	IA	O	Exon length (bp)	1069.37
OG0000219	10	IA	O	Exon length (bp)	220.58
OG0000220	42	IA	O	Exon length (bp)	357.062
OG0000222	18	IA	O	Exon length (bp)	1064.77
OG0000224	37	IA	O	Exon length (bp)	1418.83
OG0000225	42	IA	O	Exon length (bp)	1111.83
OG0000226	25	IA	O	Exon length (bp)	953.109
OG0000227	41	IA	O	Exon length (bp)	467.741
OG0000228	42	IA	O	Exon length (bp)	524.464
OG0000230	41	IA	O	Exon length (bp)	779.366
OG0000231	42	IA	O	Exon length (bp)	804.167
OG0000233	42	IA	O	Exon length (bp)	1566.53
OG0000234	42	IA	O	Exon length (bp)	390.597
OG0000235	39	IA	O	Exon length (bp)	805.43
OG0000236	41	IA	O	Exon length (bp)	904.261
OG0000237	34	IA	O	Exon length (bp)	1218.85
OG0000238	41	IA	O	Exon length (bp)	861.439
OG0000239	12	IA	O	Exon length (bp)	1076.58
OG0000241	42	IA	O	Exon length (bp)	664.194
OG0000242	42	IA	O	Exon length (bp)	539.593
OG0000243	42	IA	O	Exon length (bp)	980.533
OG0000244	42	IA	O	Exon length (bp)	689.775
OG0000245	37	IA	O	Exon length (bp)	653.315
OG0000246	32	IA	O	Exon length (bp)	603.725
OG0000247	34	IA	O	Exon length (bp)	697.686
OG0000248	15	IA	O	Exon length (bp)	859.527
OG0000249	41	IA	O	Exon length (bp)	512.236
OG0000250	42	IA	O	Exon length (bp)	1118.25
OG0000252	21	IA	O	Exon length (bp)	451.207
OG0000254	24	IA	O	Exon length (bp)	790.611
OG0000256	41	IA	O	Exon length (bp)	451.494
OG0000257	24	IA	O	Exon length (bp)	580.132
OG0000258	42	IA	O	Exon length (bp)	2025.29
OG0000260	31	IA	O	Exon length (bp)	945.713
OG0000261	41	IA	O	Exon length (bp)	1203.33
OG0000263	40	IA	O	Exon length (bp)	593.545
OG0000264	30	IA	O	Exon length (bp)	1894.4
OG0000265	39	IA	O	Exon length (bp)	710.824
OG0000266	31	IA	O	Exon length (bp)	1147.48
OG0000267	40	IA	O	Exon length (bp)	858.31
OG0000268	42	IA	O	Exon length (bp)	896.387
OG0000269	42	IA	O	Exon length (bp)	1660.22
OG0000270	41	IA	O	Exon length (bp)	639.577
OG0000271	42	IA	O	Exon length (bp)	925.154
OG0000272	17	IA	O	Exon length (bp)	788.719
OG0000273	36	IA	O	Exon length (bp)	662.24
OG0000274	42	IA	O	Exon length (bp)	885.059
OG0000275	42	IA	O	Exon length (bp)	733.928
OG0000277	28	IA	O	Exon length (bp)	976.919
OG0000278	20	IA	O	Exon length (bp)	1501.16
OG0000279	42	IA	O	Exon length (bp)	516.044
OG0000281	6	IA	O	Exon length (bp)	173.758
OG0000282	1	IA	O	Exon length (bp)	336
OG0000283	20	IA	O	Exon length (bp)	461.412
OG0000284	26	IA	O	Exon length (bp)	549.668
OG0000286	40	IA	O	Exon length (bp)	991.325
OG0000287	18	IA	O	Exon length (bp)	521.762
OG0000288	29	IA	O	Exon length (bp)	823.884
OG0000289	42	IA	O	Exon length (bp)	205.682
OG0000290	40	IA	O	Exon length (bp)	731.095
OG0000291	41	IA	O	Exon length (bp)	321.872
OG0000292	29	IA	O	Exon length (bp)	655.093
OG0000293	33	IA	O	Exon length (bp)	740.435
OG0000294	38	IA	O	Exon length (bp)	332.036
OG0000296	42	IA	O	Exon length (bp)	897.384
OG0000297	41	IA	O	Exon length (bp)	1066.71
OG0000298	35	IA	O	Exon length (bp)	972.689
OG0000299	18	IA	O	Exon length (bp)	672.472
OG0000300	40	IA	O	Exon length (bp)	835.733
OG0000301	38	IA	O	Exon length (bp)	671.68
OG0000302	39	IA	O	Exon length (bp)	1162.61
OG0000303	38	IA	O	Exon length (bp)	676.24
OG0000304	39	IA	O	Exon length (bp)	951.752
OG0000305	40	IA	O	Exon length (bp)	694.283
OG0000306	27	IA	O	Exon length (bp)	1067.16
OG0000307	42	IA	O	Exon length (bp)	163.532
OG0000308	42	IA	O	Exon length (bp)	2946.77
OG0000309	39	IA	O	Exon length (bp)	863.628
OG0000310	41	IA	O	Exon length (bp)	1342.06
OG0000311	41	IA	O	Exon length (bp)	1008.21
OG0000312	41	IA	O	Exon length (bp)	441.371
OG0000313	37	IA	O	Exon length (bp)	985.496
OG0000314	42	IA	O	Exon length (bp)	228.433
OG0000315	41	IA	O	Exon length (bp)	360.166
OG0000318	25	IA	O	Exon length (bp)	509.427
OG0000319	42	IA	O	Exon length (bp)	1006.43
OG0000320	42	IA	O	Exon length (bp)	668.513
OG0000321	42	IA	O	Exon length (bp)	876.294
OG0000323	33	IA	O	Exon length (bp)	372.806
OG0000324	42	IA	O	Exon length (bp)	1831.26
OG0000326	42	IA	O	Exon length (bp)	963.5
OG0000327	38	IA	O	Exon length (bp)	762.655
OG0000329	35	IA	O	Exon length (bp)	695.627
OG0000330	42	IA	O	Exon length (bp)	522.5
OG0000331	36	IA	O	Exon length (bp)	1302.17
OG0000332	42	IA	O	Exon length (bp)	1257.17
OG0000333	23	IA	O	Exon length (bp)	1227.65
OG0000334	21	IA	O	Exon length (bp)	1089.86
OG0000335	42	IA	O	Exon length (bp)	767.458
OG0000336	37	IA	O	Exon length (bp)	653.312
OG0000337	15	IA	O	Exon length (bp)	236.412
OG0000338	29	IA	O	Exon length (bp)	581.852
OG0000339	42	IA	O	Exon length (bp)	929.411
OG0000342	42	IA	O	Exon length (bp)	780.278
OG0000344	39	IA	O	Exon length (bp)	838.169
OG0000345	42	IA	O	Exon length (bp)	100.983
OG0000346	16	IA	O	Exon length (bp)	371.496
OG0000347	42	IA	O	Exon length (bp)	1442.11
OG0000348	42	IA	O	Exon length (bp)	1417.97
OG0000349	41	IA	O	Exon length (bp)	371.085
OG0000350	41	IA	O	Exon length (bp)	405.339
OG0000351	42	IA	O	Exon length (bp)	430.883
OG0000352	41	IA	O	Exon length (bp)	514.382
OG0000353	42	IA	O	Exon length (bp)	862.689
OG0000354	42	IA	O	Exon length (bp)	537.818
OG0000355	42	IA	O	Exon length (bp)	468.436
OG0000356	41	IA	O	Exon length (bp)	1525.89
OG0000357	42	IA	O	Exon length (bp)	154.339
OG0000358	42	IA	O	Exon length (bp)	1070.97
OG0000359	42	IA	O	Exon length (bp)	732.77
OG0000360	41	IA	O	Exon length (bp)	719.23
OG0000361	39	IA	O	Exon length (bp)	930.426
OG0000363	36	IA	O	Exon length (bp)	345.116
OG0000364	39	IA	O	Exon length (bp)	1274.1
OG0000365	19	IA	O	Exon length (bp)	360.663
OG0000366	42	IA	O	Exon length (bp)	772.645
OG0000367	42	IA	O	Exon length (bp)	1034.08
OG0000368	42	IA	O	Exon length (bp)	521.51
OG0000369	41	IA	O	Exon length (bp)	471.801
OG0000370	39	IA	O	Exon length (bp)	852.022
OG0000371	42	IA	O	Exon length (bp)	719.629
OG0000372	42	IA	O	Exon length (bp)	118.216
OG0000373	42	IA	O	Exon length (bp)	402.575
OG0000375	35	IA	O	Exon length (bp)	501.56
OG0000376	40	IA	O	Exon length (bp)	1474.77
OG0000378	42	IA	O	Exon length (bp)	855.52
OG0000380	39	IA	O	Exon length (bp)	447.966
OG0000381	42	IA	O	Exon length (bp)	1152.98
OG0000382	41	IA	O	Exon length (bp)	899.347
OG0000383	42	IA	O	Exon length (bp)	1143.18
OG0000384	42	IA	O	Exon length (bp)	795.835
OG0000385	33	IA	O	Exon length (bp)	789.965
OG0000386	41	IA	O	Exon length (bp)	968.263
OG0000387	37	IA	O	Exon length (bp)	616.918
OG0000388	41	IA	O	Exon length (bp)	739.513
OG0000389	36	IA	O	Exon length (bp)	968.727
OG0000391	33	IA	O	Exon length (bp)	966.816
OG0000392	12	IA	O	Exon length (bp)	545.776
OG0000393	41	IA	O	Exon length (bp)	665.299
OG0000394	42	IA	O	Exon length (bp)	1113.96
OG0000395	36	IA	O	Exon length (bp)	1288.23
OG0000396	42	IA	O	Exon length (bp)	1072.63
OG0000397	42	IA	O	Exon length (bp)	498.893
OG0000401	42	IA	O	Exon length (bp)	1164.12
OG0000403	42	IA	O	Exon length (bp)	1238.3
OG0000404	42	IA	O	Exon length (bp)	1560.47
OG0000406	30	IA	O	Exon length (bp)	1109.89
OG0000409	42	IA	O	Exon length (bp)	641.1
OG0000411	42	IA	O	Exon length (bp)	639.192
OG0000412	42	IA	O	Exon length (bp)	914.276
OG0000414	42	IA	O	Exon length (bp)	1144.51
OG0000415	41	IA	O	Exon length (bp)	797.161
OG0000416	41	IA	O	Exon length (bp)	901.098
OG0000418	35	IA	O	Exon length (bp)	873.822
OG0000419	42	IA	O	Exon length (bp)	583.967
OG0000420	42	IA	O	Exon length (bp)	944.36
OG0000421	42	IA	O	Exon length (bp)	819.49
OG0000422	42	IA	O	Exon length (bp)	1057.78
OG0000423	42	IA	O	Exon length (bp)	588.789
OG0000424	40	IA	O	Exon length (bp)	719.269
OG0000426	33	IA	O	Exon length (bp)	563.821
OG0000428	42	IA	O	Exon length (bp)	695.798
OG0000429	42	IA	O	Exon length (bp)	180.127
OG0000430	40	IA	O	Exon length (bp)	449.095
OG0000432	31	IA	O	Exon length (bp)	675.723
OG0000433	37	IA	O	Exon length (bp)	617.065
OG0000434	42	IA	O	Exon length (bp)	596.581
OG0000435	42	IA	O	Exon length (bp)	1130.05
OG0000436	42	IA	O	Exon length (bp)	852.178
OG0000437	23	IA	O	Exon length (bp)	668.333
OG0000438	42	IA	O	Exon length (bp)	890.971
OG0000439	38	IA	O	Exon length (bp)	1380.87
OG0000441	42	IA	O	Exon length (bp)	1061.71
OG0000442	34	IA	O	Exon length (bp)	888.205
OG0000443	41	IA	O	Exon length (bp)	946.2
OG0000445	42	IA	O	Exon length (bp)	977.206
OG0000447	25	IA	O	Exon length (bp)	539.85
OG0000448	42	IA	O	Exon length (bp)	631.186
OG0000449	36	IA	O	Exon length (bp)	1202.63
OG0000450	37	IA	O	Exon length (bp)	1662.59
OG0000452	24	IA	O	Exon length (bp)	527.49
OG0000453	42	IA	O	Exon length (bp)	277.32
OG0000454	40	IA	O	Exon length (bp)	1496.36
OG0000455	42	IA	O	Exon length (bp)	1016.9
OG0000456	29	IA	O	Exon length (bp)	933.774
OG0000457	42	IA	O	Exon length (bp)	1430.31
OG0000458	38	IA	O	Exon length (bp)	1326.7
OG0000460	40	IA	O	Exon length (bp)	953.698
OG0000461	37	IA	O	Exon length (bp)	477.111
OG0000462	42	IA	O	Exon length (bp)	413.077
OG0000463	41	IA	O	Exon length (bp)	664.191
OG0000464	41	IA	O	Exon length (bp)	673.263
OG0000465	27	IA	O	Exon length (bp)	614.177
OG0000467	40	IA	O	Exon length (bp)	364.295
OG0000468	42	IA	O	Exon length (bp)	718.01
OG0000469	41	IA	O	Exon length (bp)	1249.42
OG0000470	42	IA	O	Exon length (bp)	3536.88
OG0000471	42	IA	O	Exon length (bp)	884.453
OG0000472	42	IA	O	Exon length (bp)	1193.69
OG0000474	42	IA	O	Exon length (bp)	453.705
OG0000475	40	IA	O	Exon length (bp)	348.817
OG0000476	42	IA	O	Exon length (bp)	950.445
OG0000477	38	IA	O	Exon length (bp)	1123.39
OG0000478	36	IA	O	Exon length (bp)	983.044
OG0000479	21	IA	O	Exon length (bp)	375.46
OG0000480	25	IA	O	Exon length (bp)	318.606
OG0000481	42	IA	O	Exon length (bp)	1216.73
OG0000482	42	IA	O	Exon length (bp)	257.546
OG0000483	40	IA	O	Exon length (bp)	454.433
OG0000484	28	IA	O	Exon length (bp)	856.613
OG0000485	42	IA	O	Exon length (bp)	2835.63
OG0000486	35	IA	O	Exon length (bp)	976.175
OG0000487	35	IA	O	Exon length (bp)	360.344
OG0000488	42	IA	O	Exon length (bp)	1511.33
OG0000490	39	IA	O	Exon length (bp)	1392.85
OG0000491	38	IA	O	Exon length (bp)	1457.03
OG0000492	32	IA	O	Exon length (bp)	767.302
OG0000493	42	IA	O	Exon length (bp)	629.362
OG0000494	13	IA	O	Exon length (bp)	964
OG0000495	41	IA	O	Exon length (bp)	448.079
OG0000497	41	IA	O	Exon length (bp)	644.599
OG0000499	42	IA	O	Exon length (bp)	964.13
OG0000501	42	IA	O	Exon length (bp)	1394.75
OG0000502	41	IA	O	Exon length (bp)	680.885
OG0000505	36	IA	O	Exon length (bp)	697.771
OG0000506	42	IA	O	Exon length (bp)	446.146
OG0000508	41	IA	O	Exon length (bp)	1229.24
OG0000509	42	IA	O	Exon length (bp)	986.69
OG0000512	42	IA	O	Exon length (bp)	680.069
OG0000514	41	IA	O	Exon length (bp)	569.429
OG0000515	42	IA	O	Exon length (bp)	282.837
OG0000516	42	IA	O	Exon length (bp)	308.547
OG0000519	23	IA	O	Exon length (bp)	483.353
OG0000520	22	IA	O	Exon length (bp)	1236.93
OG0000523	35	IA	O	Exon length (bp)	833.531
OG0000524	21	IA	O	Exon length (bp)	845.508
OG0000526	42	IA	O	Exon length (bp)	1481.46
OG0000529	1	IA	O	Exon length (bp)	419
OG0000530	41	IA	O	Exon length (bp)	1568.92
OG0000531	41	IA	O	Exon length (bp)	1097.3
OG0000532	39	IA	O	Exon length (bp)	509.134
OG0000534	39	IA	O	Exon length (bp)	2539.77
OG0000535	42	IA	O	Exon length (bp)	1418.34
OG0000536	42	IA	O	Exon length (bp)	811.573
OG0000538	42	IA	O	Exon length (bp)	708.087
OG0000540	40	IA	O	Exon length (bp)	771.268
OG0000542	38	IA	O	Exon length (bp)	344.285
OG0000543	42	IA	O	Exon length (bp)	1045.74
OG0000544	42	IA	O	Exon length (bp)	190.203
OG0000545	41	IA	O	Exon length (bp)	916.402
OG0000546	42	IA	O	Exon length (bp)	797.341
OG0000547	42	IA	O	Exon length (bp)	974.085
OG0000550	38	IA	O	Exon length (bp)	854.09
OG0000551	42	IA	O	Exon length (bp)	921.03
OG0000553	38	IA	O	Exon length (bp)	367.256
OG0000554	41	IA	O	Exon length (bp)	1124.94
OG0000555	39	IA	O	Exon length (bp)	374.175
OG0000560	42	IA	O	Exon length (bp)	1349.7
OG0000561	42	IA	O	Exon length (bp)	1045.95
OG0000562	32	IA	O	Exon length (bp)	691.751
OG0000563	42	IA	O	Exon length (bp)	557.346
OG0000564	17	IA	O	Exon length (bp)	542.134
OG0000565	42	IA	O	Exon length (bp)	680.94
OG0000566	42	IA	O	Exon length (bp)	2922.97
OG0000567	42	IA	O	Exon length (bp)	973.41
OG0000570	42	IA	O	Exon length (bp)	529.345
OG0000571	30	IA	O	Exon length (bp)	996.622
OG0000572	42	IA	O	Exon length (bp)	1442.8
OG0000575	30	IA	O	Exon length (bp)	923.654
OG0000576	42	IA	O	Exon length (bp)	444.327
OG0000577	32	IA	O	Exon length (bp)	560.558
OG0000578	41	IA	O	Exon length (bp)	521.838
OG0000580	42	IA	O	Exon length (bp)	588.812
OG0000581	42	IA	O	Exon length (bp)	772.532
OG0000582	42	IA	O	Exon length (bp)	417.308
OG0000584	42	IA	O	Exon length (bp)	556.158
OG0000585	40	IA	O	Exon length (bp)	668.215
OG0000586	42	IA	O	Exon length (bp)	532.21
OG0000587	34	IA	O	Exon length (bp)	899.618
OG0000588	42	IA	O	Exon length (bp)	181.035
OG0000589	42	IA	O	Exon length (bp)	1196.25
OG0000590	42	IA	O	Exon length (bp)	465.107
OG0000591	27	IA	O	Exon length (bp)	464.147
OG0000592	42	IA	O	Exon length (bp)	311.543
OG0000593	41	IA	O	Exon length (bp)	488.613
OG0000594	25	IA	O	Exon length (bp)	586.281
OG0000595	17	IA	O	Exon length (bp)	1246.91
OG0000596	39	IA	O	Exon length (bp)	536.317
OG0000597	42	IA	O	Exon length (bp)	693.038
OG0000599	40	IA	O	Exon length (bp)	1465.51
OG0000600	42	IA	O	Exon length (bp)	466.244
OG0000601	42	IA	O	Exon length (bp)	1364.81
OG0000602	42	IA	O	Exon length (bp)	140.584
OG0000605	42	IA	O	Exon length (bp)	1165.27
OG0000606	39	IA	O	Exon length (bp)	486.483
OG0000607	42	IA	O	Exon length (bp)	555.387
OG0000608	42	IA	O	Exon length (bp)	414.022
OG0000609	40	IA	O	Exon length (bp)	844.26
OG0000610	40	IA	O	Exon length (bp)	845.114
OG0000616	38	IA	O	Exon length (bp)	377.303
OG0000617	42	IA	O	Exon length (bp)	570.057
OG0000618	40	IA	O	Exon length (bp)	744.624
OG0000619	42	IA	O	Exon length (bp)	99.3666
OG0000620	42	IA	O	Exon length (bp)	255.368
OG0000621	42	IA	O	Exon length (bp)	420.858
OG0000622	42	IA	O	Exon length (bp)	325.659
OG0000623	41	IA	O	Exon length (bp)	806.408
OG0000624	28	IA	O	Exon length (bp)	885.413
OG0000626	42	IA	O	Exon length (bp)	1299.52
OG0000627	33	IA	O	Exon length (bp)	365.009
OG0000628	42	IA	O	Exon length (bp)	577.128
OG0000629	42	IA	O	Exon length (bp)	141.147
OG0000630	33	IA	O	Exon length (bp)	1205.97
OG0000631	42	IA	O	Exon length (bp)	222.713
OG0000632	42	IA	O	Exon length (bp)	1630.36
OG0000633	42	IA	O	Exon length (bp)	1374.77
OG0000634	42	IA	O	Exon length (bp)	342.816
OG0000635	40	IA	O	Exon length (bp)	838.718
OG0000636	42	IA	O	Exon length (bp)	1147.88
OG0000637	42	IA	O	Exon length (bp)	488.597
OG0000638	42	IA	O	Exon length (bp)	151.735
OG0000639	40	IA	O	Exon length (bp)	928.586
OG0000640	41	IA	O	Exon length (bp)	564.617
OG0000641	42	IA	O	Exon length (bp)	385.21
OG0000643	39	IA	O	Exon length (bp)	641.643
OG0000644	42	IA	O	Exon length (bp)	759.578
OG0000645	42	IA	O	Exon length (bp)	875.925
OG0000646	42	IA	O	Exon length (bp)	706.204
OG0000647	42	IA	O	Exon length (bp)	278.963
OG0000648	42	IA	O	Exon length (bp)	1362.39
OG0000649	41	IA	O	Exon length (bp)	710.763
OG0000650	11	IA	O	Exon length (bp)	661.25
OG0000651	31	IA	O	Exon length (bp)	1500.2
OG0000654	42	IA	O	Exon length (bp)	805.631
OG0000655	40	IA	O	Exon length (bp)	2748.75
OG0000656	42	IA	O	Exon length (bp)	517.164
OG0000657	42	IA	O	Exon length (bp)	170.502
OG0000660	42	IA	O	Exon length (bp)	492.486
OG0000662	41	IA	O	Exon length (bp)	969.385
OG0000663	42	IA	O	Exon length (bp)	918.135
OG0000664	1	IA	O	Exon length (bp)	349.2
OG0000666	42	IA	O	Exon length (bp)	1285.96
OG0000667	42	IA	O	Exon length (bp)	1192.5
OG0000668	41	IA	O	Exon length (bp)	320.238
OG0000669	42	IA	O	Exon length (bp)	545.989
OG0000670	41	IA	O	Exon length (bp)	477.719
OG0000671	29	IA	O	Exon length (bp)	523.22
OG0000672	19	IA	O	Exon length (bp)	444.691
OG0000674	42	IA	O	Exon length (bp)	650.555
OG0000675	42	IA	O	Exon length (bp)	1199.87
OG0000676	42	IA	O	Exon length (bp)	381.743
OG0000677	42	IA	O	Exon length (bp)	660.683
OG0000678	30	IA	O	Exon length (bp)	695.752
OG0000679	31	IA	O	Exon length (bp)	1127.43
OG0000680	42	IA	O	Exon length (bp)	1555.16
OG0000681	35	IA	O	Exon length (bp)	763.838
OG0000682	42	IA	O	Exon length (bp)	845.825
OG0000683	10	IA	O	Exon length (bp)	442.375
OG0000684	42	IA	O	Exon length (bp)	1052.29
OG0000685	42	IA	O	Exon length (bp)	1816.68
OG0000686	42	IA	O	Exon length (bp)	2168.57
OG0000687	41	IA	O	Exon length (bp)	483.763
OG0000688	42	IA	O	Exon length (bp)	255.472
OG0000690	42	IA	O	Exon length (bp)	411.196
OG0000691	42	IA	O	Exon length (bp)	1543.24
OG0000693	42	IA	O	Exon length (bp)	838.42
OG0000694	41	IA	O	Exon length (bp)	776.546
OG0000695	42	IA	O	Exon length (bp)	136.951
OG0000697	40	IA	O	Exon length (bp)	695.902
OG0000698	40	IA	O	Exon length (bp)	804.773
OG0000699	26	IA	O	Exon length (bp)	629.892
OG0000700	42	IA	O	Exon length (bp)	381.625
OG0000701	42	IA	O	Exon length (bp)	574.48
OG0000703	11	IA	O	Exon length (bp)	722.779
OG0000704	41	IA	O	Exon length (bp)	3420.26
OG0000706	42	IA	O	Exon length (bp)	601.417
OG0000707	42	IA	O	Exon length (bp)	758.598
OG0000708	42	IA	O	Exon length (bp)	1467.48
OG0000709	25	IA	O	Exon length (bp)	739.481
OG0000711	42	IA	O	Exon length (bp)	1226.72
OG0000712	42	IA	O	Exon length (bp)	232.685
OG0000713	41	IA	O	Exon length (bp)	292.848
OG0000714	42	IA	O	Exon length (bp)	562.789
OG0000715	41	IA	O	Exon length (bp)	183.408
OG0000716	42	IA	O	Exon length (bp)	1034.2
OG0000717	42	IA	O	Exon length (bp)	702.573
OG0000718	25	IA	O	Exon length (bp)	541.2
OG0000719	16	IA	O	Exon length (bp)	799.676
OG0000720	42	IA	O	Exon length (bp)	455.379
OG0000721	42	IA	O	Exon length (bp)	1378.44
OG0000722	19	IA	O	Exon length (bp)	332.98
OG0000723	42	IA	O	Exon length (bp)	1579.05
OG0000727	39	IA	O	Exon length (bp)	1118.72
OG0000728	42	IA	O	Exon length (bp)	413.746
OG0000729	42	IA	O	Exon length (bp)	260.074
OG0000730	42	IA	O	Exon length (bp)	674.687
OG0000732	5	IA	O	Exon length (bp)	1105.8
OG0000733	42	IA	O	Exon length (bp)	1172.95
OG0000735	41	IA	O	Exon length (bp)	1457.95
OG0000736	42	IA	O	Exon length (bp)	1911.8
OG0000737	31	IA	O	Exon length (bp)	222.082
OG0000739	42	IA	O	Exon length (bp)	795.28
OG0000740	42	IA	O	Exon length (bp)	782.928
OG0000741	35	IA	O	Exon length (bp)	879.181
OG0000742	29	IA	O	Exon length (bp)	549.003
OG0000743	31	IA	O	Exon length (bp)	957.263
OG0000744	42	IA	O	Exon length (bp)	1424.33
OG0000745	40	IA	O	Exon length (bp)	273.915
OG0000746	42	IA	O	Exon length (bp)	503.374
OG0000747	42	IA	O	Exon length (bp)	1237.28
OG0000748	30	IA	O	Exon length (bp)	699.903
OG0000749	41	IA	O	Exon length (bp)	874.558
OG0000751	38	IA	O	Exon length (bp)	408.888
OG0000753	37	IA	O	Exon length (bp)	412.106
OG0000755	32	IA	O	Exon length (bp)	646.271
OG0000756	42	IA	O	Exon length (bp)	700.582
OG0000759	42	IA	O	Exon length (bp)	476.526
OG0000760	42	IA	O	Exon length (bp)	853.229
OG0000761	42	IA	O	Exon length (bp)	1331.51
OG0000762	36	IA	O	Exon length (bp)	336.269
OG0000763	42	IA	O	Exon length (bp)	959.3
OG0000764	42	IA	O	Exon length (bp)	778.06
OG0000765	42	IA	O	Exon length (bp)	1308.11
OG0000767	42	IA	O	Exon length (bp)	243.499
OG0000768	27	IA	O	Exon length (bp)	279.871
OG0000769	42	IA	O	Exon length (bp)	1730.39
OG0000770	42	IA	O	Exon length (bp)	1365.36
OG0000771	42	IA	O	Exon length (bp)	810.933
OG0000773	42	IA	O	Exon length (bp)	298.982
OG0000774	42	IA	O	Exon length (bp)	1225.02
OG0000775	13	IA	O	Exon length (bp)	950.964
OG0000777	12	IA	O	Exon length (bp)	863.826
OG0000778	42	IA	O	Exon length (bp)	395.543
OG0000779	18	IA	O	Exon length (bp)	580.304
OG0000780	42	IA	O	Exon length (bp)	1094.34
OG0000781	42	IA	O	Exon length (bp)	1390.35
OG0000782	42	IA	O	Exon length (bp)	1610.49
OG0000783	41	IA	O	Exon length (bp)	644.466
OG0000786	42	IA	O	Exon length (bp)	438.318
OG0000787	42	IA	O	Exon length (bp)	262.555
OG0000788	34	IA	O	Exon length (bp)	1032.1
OG0000789	42	IA	O	Exon length (bp)	1379.52
OG0000790	31	IA	O	Exon length (bp)	706.355
OG0000791	42	IA	O	Exon length (bp)	287.632
OG0000793	42	IA	O	Exon length (bp)	460.474
OG0000794	31	IA	O	Exon length (bp)	1129.87
OG0000795	42	IA	O	Exon length (bp)	2182.76
OG0000799	40	IA	O	Exon length (bp)	964.35
OG0000800	42	IA	O	Exon length (bp)	342.023
OG0000801	39	IA	O	Exon length (bp)	1161.12
OG0000802	42	IA	O	Exon length (bp)	878.528
OG0000803	42	IA	O	Exon length (bp)	2412.1
OG0000804	42	IA	O	Exon length (bp)	682.812
OG0000805	42	IA	O	Exon length (bp)	481.349
OG0000807	42	IA	O	Exon length (bp)	1780.61
OG0000808	32	IA	O	Exon length (bp)	597.554
OG0000809	42	IA	O	Exon length (bp)	1214.51
OG0000812	42	IA	O	Exon length (bp)	617.955
OG0000813	42	IA	O	Exon length (bp)	1126.12
OG0000814	42	IA	O	Exon length (bp)	1146.24
OG0000815	28	IA	O	Exon length (bp)	1079.2
OG0000817	40	IA	O	Exon length (bp)	468.251
OG0000818	39	IA	O	Exon length (bp)	705.707
OG0000820	40	IA	O	Exon length (bp)	151.767
OG0000821	40	IA	O	Exon length (bp)	1582.4
OG0000822	41	IA	O	Exon length (bp)	1770.28
OG0000823	42	IA	O	Exon length (bp)	1683.73
OG0000824	42	IA	O	Exon length (bp)	256.147
OG0000826	41	IA	O	Exon length (bp)	530.42
OG0000827	39	IA	O	Exon length (bp)	416.302
OG0000829	40	IA	O	Exon length (bp)	494.192
OG0000830	40	IA	O	Exon length (bp)	894.619
OG0000831	40	IA	O	Exon length (bp)	205.822
OG0000832	30	IA	O	Exon length (bp)	544.034
OG0000834	42	IA	O	Exon length (bp)	343.393
OG0000836	42	IA	O	Exon length (bp)	1304.4
OG0000837	31	IA	O	Exon length (bp)	656.045
OG0000838	42	IA	O	Exon length (bp)	1333.63
OG0000839	25	IA	O	Exon length (bp)	1164.45
OG0000840	42	IA	O	Exon length (bp)	1118.54
OG0000841	42	IA	O	Exon length (bp)	1003.62
OG0000842	42	IA	O	Exon length (bp)	1086.75
OG0000843	42	IA	O	Exon length (bp)	595.895
OG0000845	34	IA	O	Exon length (bp)	757.497
OG0000846	42	IA	O	Exon length (bp)	641.688
OG0000847	41	IA	O	Exon length (bp)	963.42
OG0000848	21	IA	O	Exon length (bp)	496.975
OG0000849	34	IA	O	Exon length (bp)	635.814
OG0000850	38	IA	O	Exon length (bp)	615.815
OG0000851	42	IA	O	Exon length (bp)	1418.84
OG0000852	34	IA	O	Exon length (bp)	351.034
OG0000853	42	IA	O	Exon length (bp)	788.899
OG0000854	42	IA	O	Exon length (bp)	1000.82
OG0000855	36	IA	O	Exon length (bp)	346.91
OG0000856	28	IA	O	Exon length (bp)	1734.91
OG0000858	42	IA	O	Exon length (bp)	929.347
OG0000859	41	IA	O	Exon length (bp)	440.594
OG0000860	42	IA	O	Exon length (bp)	800.793
OG0000861	42	IA	O	Exon length (bp)	688.451
OG0000863	42	IA	O	Exon length (bp)	622.252
OG0000864	35	IA	O	Exon length (bp)	688.288
OG0000865	21	IA	O	Exon length (bp)	662.551
OG0000866	32	IA	O	Exon length (bp)	1082.86
OG0000867	30	IA	O	Exon length (bp)	839.493
OG0000868	42	IA	O	Exon length (bp)	875.886
OG0000869	42	IA	O	Exon length (bp)	2011.14
OG0000870	14	IA	O	Exon length (bp)	557.135
OG0000871	42	IA	O	Exon length (bp)	662.081
OG0000872	35	IA	O	Exon length (bp)	364.836
OG0000873	42	IA	O	Exon length (bp)	549.466
OG0000874	42	IA	O	Exon length (bp)	765.645
OG0000875	42	IA	O	Exon length (bp)	1265.93
OG0000876	42	IA	O	Exon length (bp)	543.344
OG0000877	42	IA	O	Exon length (bp)	1428.73
OG0000878	41	IA	O	Exon length (bp)	500.393
OG0000879	42	IA	O	Exon length (bp)	1294.97
OG0000880	42	IA	O	Exon length (bp)	236.597
OG0000881	42	IA	O	Exon length (bp)	651.679
OG0000882	42	IA	O	Exon length (bp)	423.595
OG0000883	42	IA	O	Exon length (bp)	1859.3
OG0000884	42	IA	O	Exon length (bp)	628.69
OG0000885	42	IA	O	Exon length (bp)	781.084
OG0000886	41	IA	O	Exon length (bp)	377.429
OG0000887	42	IA	O	Exon length (bp)	548.795
OG0000888	35	IA	O	Exon length (bp)	952.49
OG0000889	31	IA	O	Exon length (bp)	754.422
OG0000890	40	IA	O	Exon length (bp)	465.63
OG0000891	38	IA	O	Exon length (bp)	366.297
OG0000892	41	IA	O	Exon length (bp)	1157.24
OG0000893	42	IA	O	Exon length (bp)	1119.65
OG0000894	34	IA	O	Exon length (bp)	687.301
OG0000895	39	IA	O	Exon length (bp)	4340.38
OG0000896	41	IA	O	Exon length (bp)	458.333
OG0000897	42	IA	O	Exon length (bp)	2394.21
OG0000898	38	IA	O	Exon length (bp)	376.024
OG0000899	41	IA	O	Exon length (bp)	1039.92
OG0000900	41	IA	O	Exon length (bp)	323.553
OG0000901	27	IA	O	Exon length (bp)	538.164
OG0000903	42	IA	O	Exon length (bp)	348.988
OG0000904	42	IA	O	Exon length (bp)	881.444
OG0000905	40	IA	O	Exon length (bp)	1443.94
OG0000907	42	IA	O	Exon length (bp)	1105.49
OG0000908	37	IA	O	Exon length (bp)	636.821
OG0000910	21	IA	O	Exon length (bp)	1061.71
OG0000911	42	IA	O	Exon length (bp)	1294.53
OG0000912	41	IA	O	Exon length (bp)	782.362
OG0000914	42	IA	O	Exon length (bp)	467.572
OG0000916	42	IA	O	Exon length (bp)	565.757
OG0000917	42	IA	O	Exon length (bp)	935.996
OG0000920	25	IA	O	Exon length (bp)	603.544
OG0000923	22	IA	O	Exon length (bp)	908.141
OG0000924	42	IA	O	Exon length (bp)	904.584
OG0000927	42	IA	O	Exon length (bp)	415.656
OG0000928	40	IA	O	Exon length (bp)	808.125
OG0000930	26	IA	O	Exon length (bp)	823.764
OG0000931	42	IA	O	Exon length (bp)	881.776
OG0000932	35	IA	O	Exon length (bp)	903.243
OG0000933	40	IA	O	Exon length (bp)	730.375
OG0000934	42	IA	O	Exon length (bp)	1450.1
OG0000936	42	IA	O	Exon length (bp)	994.519
OG0000937	42	IA	O	Exon length (bp)	817.422
OG0000938	41	IA	O	Exon length (bp)	1228.83
OG0000940	42	IA	O	Exon length (bp)	719.459
OG0000941	42	IA	O	Exon length (bp)	1907.69
OG0000942	42	IA	O	Exon length (bp)	970.656
OG0000944	42	IA	O	Exon length (bp)	1543.14
OG0000945	28	IA	O	Exon length (bp)	2030.43
OG0000946	42	IA	O	Exon length (bp)	700.18
OG0000947	30	IA	O	Exon length (bp)	763.455
OG0000948	38	IA	O	Exon length (bp)	1068.16
OG0000950	3	IA	O	Exon length (bp)	594.808
OG0000951	13	IA	O	Exon length (bp)	477.692
OG0000952	42	IA	O	Exon length (bp)	503.529
OG0000953	20	IA	O	Exon length (bp)	721.276
OG0000954	41	IA	O	Exon length (bp)	1356.68
OG0000956	38	IA	O	Exon length (bp)	457.675
OG0000957	42	IA	O	Exon length (bp)	531
OG0000958	42	IA	O	Exon length (bp)	185.95
OG0000959	25	IA	O	Exon length (bp)	700.621
OG0000961	42	IA	O	Exon length (bp)	523.946
OG0000962	42	IA	O	Exon length (bp)	391.57
OG0000963	42	IA	O	Exon length (bp)	722.008
OG0000964	42	IA	O	Exon length (bp)	539.745
OG0000966	42	IA	O	Exon length (bp)	764.591
OG0000968	42	IA	O	Exon length (bp)	913.424
OG0000971	42	IA	O	Exon length (bp)	928.895
OG0000972	42	IA	O	Exon length (bp)	1806.63
OG0000974	42	IA	O	Exon length (bp)	315.795
OG0000975	42	IA	O	Exon length (bp)	467.232
OG0000976	42	IA	O	Exon length (bp)	632.18
OG0000977	39	IA	O	Exon length (bp)	718.306
OG0000978	32	IA	O	Exon length (bp)	579
OG0000979	19	IA	O	Exon length (bp)	900.24
OG0000980	42	IA	O	Exon length (bp)	691.009
OG0000982	41	IA	O	Exon length (bp)	783.944
OG0000983	39	IA	O	Exon length (bp)	333.885
OG0000984	9	IA	O	Exon length (bp)	556.333
OG0000986	1	IA	O	Exon length (bp)	579
OG0000987	42	IA	O	Exon length (bp)	1189.72
OG0000988	39	IA	O	Exon length (bp)	744.116
OG0000989	42	IA	O	Exon length (bp)	1044.27
OG0000990	42	IA	O	Exon length (bp)	1196.55
OG0000992	41	IA	O	Exon length (bp)	369.725
OG0000994	42	IA	O	Exon length (bp)	1643.75
OG0000996	24	IA	O	Exon length (bp)	603.136
OG0000998	42	IA	O	Exon length (bp)	1511.68
OG0000999	39	IA	O	Exon length (bp)	428.163
OG0001000	16	IA	O	Exon length (bp)	3318.19
OG0001001	42	IA	O	Exon length (bp)	478.156
OG0001002	41	IA	O	Exon length (bp)	1502.16
OG0001003	42	IA	O	Exon length (bp)	419.906
OG0001005	40	IA	O	Exon length (bp)	1115.47
OG0001006	41	IA	O	Exon length (bp)	658.88
OG0001007	15	IA	O	Exon length (bp)	782.602
OG0001009	41	IA	O	Exon length (bp)	893.652
OG0001010	42	IA	O	Exon length (bp)	751.844
OG0001011	42	IA	O	Exon length (bp)	1407.52
OG0001014	42	IA	O	Exon length (bp)	677.232
OG0001015	42	IA	O	Exon length (bp)	1101.52
OG0001018	36	IA	O	Exon length (bp)	908.841
OG0001019	42	IA	O	Exon length (bp)	1284.56
OG0001020	42	IA	O	Exon length (bp)	399.512
OG0001021	41	IA	O	Exon length (bp)	478.957
OG0001022	42	IA	O	Exon length (bp)	764.382
OG0001023	36	IA	O	Exon length (bp)	592.788
OG0001024	40	IA	O	Exon length (bp)	90.8077
OG0001026	41	IA	O	Exon length (bp)	440.742
OG0001027	42	IA	O	Exon length (bp)	834.425
OG0001028	42	IA	O	Exon length (bp)	1348.54
OG0001029	38	IA	O	Exon length (bp)	774.636
OG0001030	40	IA	O	Exon length (bp)	643.966
OG0001031	42	IA	O	Exon length (bp)	789.809
OG0001032	42	IA	O	Exon length (bp)	386.618
OG0001034	42	IA	O	Exon length (bp)	814.497
OG0001035	42	IA	O	Exon length (bp)	324.241
OG0001037	39	IA	O	Exon length (bp)	1009.64
OG0001038	41	IA	O	Exon length (bp)	533.597
OG0001039	42	IA	O	Exon length (bp)	1095.14
OG0001040	42	IA	O	Exon length (bp)	1144.59
OG0001041	35	IA	O	Exon length (bp)	625.136
OG0001042	24	IA	O	Exon length (bp)	648.185
OG0001043	27	IA	O	Exon length (bp)	494.981
OG0001048	42	IA	O	Exon length (bp)	631.177
OG0001049	40	IA	O	Exon length (bp)	1254.81
OG0001050	41	IA	O	Exon length (bp)	446.189
OG0001051	42	IA	O	Exon length (bp)	2255.23
OG0001052	18	IA	O	Exon length (bp)	452.331
OG0001054	37	IA	O	Exon length (bp)	876.662
OG0001056	41	IA	O	Exon length (bp)	832.672
OG0001058	23	IA	O	Exon length (bp)	741.65
OG0001060	42	IA	O	Exon length (bp)	858.504
OG0001062	42	IA	O	Exon length (bp)	289.545
OG0001063	39	IA	O	Exon length (bp)	923.863
OG0001065	37	IA	O	Exon length (bp)	303.722
OG0001066	31	IA	O	Exon length (bp)	688.462
OG0001067	42	IA	O	Exon length (bp)	3137.08
OG0001068	42	IA	O	Exon length (bp)	995.309
OG0001070	15	IA	O	Exon length (bp)	1095.53
OG0001072	42	IA	O	Exon length (bp)	648.117
OG0001073	40	IA	O	Exon length (bp)	954.291
OG0001074	41	IA	O	Exon length (bp)	786.75
OG0001076	39	IA	O	Exon length (bp)	245.329
OG0001077	42	IA	O	Exon length (bp)	312.722
OG0001078	41	IA	O	Exon length (bp)	254.625
OG0001079	42	IA	O	Exon length (bp)	208.5
OG0001080	24	IA	O	Exon length (bp)	491.174
OG0001081	42	IA	O	Exon length (bp)	499.087
OG0001082	39	IA	O	Exon length (bp)	595
OG0001083	40	IA	O	Exon length (bp)	272.806
OG0001084	42	IA	O	Exon length (bp)	999.151
OG0001087	13	IA	O	Exon length (bp)	423.407
OG0001089	42	IA	O	Exon length (bp)	1421.39
OG0001090	42	IA	O	Exon length (bp)	629.396
OG0001091	27	IA	O	Exon length (bp)	408.205
OG0001093	38	IA	O	Exon length (bp)	947.434
OG0001095	42	IA	O	Exon length (bp)	1062.51
OG0001096	42	IA	O	Exon length (bp)	1609.93
OG0001097	42	IA	O	Exon length (bp)	489.184
OG0001098	42	IA	O	Exon length (bp)	558.508
OG0001099	42	IA	O	Exon length (bp)	1222.51
OG0001100	27	IA	O	Exon length (bp)	1942.39
OG0001101	42	IA	O	Exon length (bp)	484.525
OG0001102	32	IA	O	Exon length (bp)	333.61
OG0001103	42	IA	O	Exon length (bp)	459.385
OG0001104	40	IA	O	Exon length (bp)	445.513
OG0001105	42	IA	O	Exon length (bp)	619.177
OG0001106	21	IA	O	Exon length (bp)	601.711
OG0001107	42	IA	O	Exon length (bp)	441.004
OG0001108	38	IA	O	Exon length (bp)	769.527
OG0001111	37	IA	O	Exon length (bp)	450.939
OG0001113	41	IA	O	Exon length (bp)	1888.73
OG0001115	42	IA	O	Exon length (bp)	398.757
OG0001116	42	IA	O	Exon length (bp)	426.198
OG0001117	37	IA	O	Exon length (bp)	623.007
OG0001118	22	IA	O	Exon length (bp)	468.063
OG0001119	26	IA	O	Exon length (bp)	574.479
OG0001121	32	IA	O	Exon length (bp)	959.033
OG0001123	42	IA	O	Exon length (bp)	702.306
OG0001124	42	IA	O	Exon length (bp)	1556.68
OG0001126	40	IA	O	Exon length (bp)	638.327
OG0001127	42	IA	O	Exon length (bp)	840.539
OG0001128	30	IA	O	Exon length (bp)	491.3
OG0001129	40	IA	O	Exon length (bp)	790.882
OG0001130	42	IA	O	Exon length (bp)	789.898
OG0001131	42	IA	O	Exon length (bp)	268.671
OG0001133	41	IA	O	Exon length (bp)	659.305
OG0001134	42	IA	O	Exon length (bp)	967.456
OG0001135	42	IA	O	Exon length (bp)	1071.28
OG0001136	41	IA	O	Exon length (bp)	394.501
OG0001137	42	IA	O	Exon length (bp)	1076.98
OG0001138	41	IA	O	Exon length (bp)	607.388
OG0001139	41	IA	O	Exon length (bp)	121.383
OG0001140	42	IA	O	Exon length (bp)	1642.32
OG0001141	42	IA	O	Exon length (bp)	1010.25
OG0001143	42	IA	O	Exon length (bp)	1491.74
OG0001144	30	IA	O	Exon length (bp)	386.136
OG0001145	40	IA	O	Exon length (bp)	413.36
OG0001146	42	IA	O	Exon length (bp)	597.134
OG0001147	41	IA	O	Exon length (bp)	599.637
OG0001148	42	IA	O	Exon length (bp)	537.034
OG0001149	42	IA	O	Exon length (bp)	782.374
OG0001151	34	IA	O	Exon length (bp)	622.488
OG0001152	42	IA	O	Exon length (bp)	1206.1
OG0001154	42	IA	O	Exon length (bp)	1340.28
OG0001156	41	IA	O	Exon length (bp)	1599.1
OG0001157	34	IA	O	Exon length (bp)	564.842
OG0001158	42	IA	O	Exon length (bp)	134.815
OG0001161	42	IA	O	Exon length (bp)	544.635
OG0001163	19	IA	O	Exon length (bp)	785.762
OG0001165	42	IA	O	Exon length (bp)	919.209
OG0001166	40	IA	O	Exon length (bp)	745.653
OG0001168	41	IA	O	Exon length (bp)	403.63
OG0001169	42	IA	O	Exon length (bp)	708.564
OG0001170	36	IA	O	Exon length (bp)	615.629
OG0001172	41	IA	O	Exon length (bp)	1302.07
OG0001173	38	IA	O	Exon length (bp)	389.63
OG0001174	42	IA	O	Exon length (bp)	336.006
OG0001175	41	IA	O	Exon length (bp)	618.702
OG0001177	42	IA	O	Exon length (bp)	571.293
OG0001178	42	IA	O	Exon length (bp)	1257.32
OG0001179	41	IA	O	Exon length (bp)	341.009
OG0001180	42	IA	O	Exon length (bp)	475.307
OG0001184	32	IA	O	Exon length (bp)	571.063
OG0001185	1	IA	O	Exon length (bp)	315
OG0001186	42	IA	O	Exon length (bp)	779.775
OG0001187	38	IA	O	Exon length (bp)	665.584
OG0001188	34	IA	O	Exon length (bp)	569.51
OG0001189	42	IA	O	Exon length (bp)	1762.85
OG0001190	41	IA	O	Exon length (bp)	708.648
OG0001192	41	IA	O	Exon length (bp)	658.759
OG0001193	42	IA	O	Exon length (bp)	1086.52
OG0001194	39	IA	O	Exon length (bp)	2446.01
OG0001195	41	IA	O	Exon length (bp)	729.792
OG0001196	41	IA	O	Exon length (bp)	676.852
OG0001198	27	IA	O	Exon length (bp)	522.942
OG0001199	41	IA	O	Exon length (bp)	610.642
OG0001201	42	IA	O	Exon length (bp)	1325.98
OG0001203	42	IA	O	Exon length (bp)	1126.46
OG0001204	42	IA	O	Exon length (bp)	693.449
OG0001206	29	IA	O	Exon length (bp)	751.614
OG0001208	41	IA	O	Exon length (bp)	666.686
OG0001209	38	IA	O	Exon length (bp)	660.939
OG0001210	42	IA	O	Exon length (bp)	1102.11
OG0001211	41	IA	O	Exon length (bp)	1119.79
OG0001213	41	IA	O	Exon length (bp)	307.028
OG0001214	42	IA	O	Exon length (bp)	1350.05
OG0001215	42	IA	O	Exon length (bp)	662.065
OG0001216	32	IA	O	Exon length (bp)	333.058
OG0001217	40	IA	O	Exon length (bp)	653.475
OG0001218	42	IA	O	Exon length (bp)	376.519
OG0001219	42	IA	O	Exon length (bp)	753.691
OG0001220	42	IA	O	Exon length (bp)	239.785
OG0001221	20	IA	O	Exon length (bp)	746.231
OG0001223	42	IA	O	Exon length (bp)	526.199
OG0001226	39	IA	O	Exon length (bp)	189.69
OG0001227	42	IA	O	Exon length (bp)	493.51
OG0001228	41	IA	O	Exon length (bp)	616.346
OG0001229	42	IA	O	Exon length (bp)	1259.68
OG0001230	28	IA	O	Exon length (bp)	657.034
OG0001231	42	IA	O	Exon length (bp)	2272.2
OG0001232	37	IA	O	Exon length (bp)	241.398
OG0001233	42	IA	O	Exon length (bp)	836.805
OG0001235	37	IA	O	Exon length (bp)	2002.8
OG0001236	42	IA	O	Exon length (bp)	390.472
OG0001237	30	IA	O	Exon length (bp)	1033.52
OG0001238	41	IA	O	Exon length (bp)	1210.46
OG0001240	41	IA	O	Exon length (bp)	278.145
OG0001241	42	IA	O	Exon length (bp)	849.341
OG0001242	39	IA	O	Exon length (bp)	439.122
OG0001243	42	IA	O	Exon length (bp)	501.158
OG0001244	26	IA	O	Exon length (bp)	1279.73
OG0001246	42	IA	O	Exon length (bp)	539.32
OG0001247	42	IA	O	Exon length (bp)	728.596
OG0001249	40	IA	O	Exon length (bp)	507.317
OG0001250	38	IA	O	Exon length (bp)	1282.24
OG0001252	41	IA	O	Exon length (bp)	514.398
OG0001254	40	IA	O	Exon length (bp)	317.281
OG0001255	40	IA	O	Exon length (bp)	597.558
OG0001256	42	IA	O	Exon length (bp)	906.828
OG0001257	42	IA	O	Exon length (bp)	131.299
OG0001258	41	IA	O	Exon length (bp)	307.292
OG0001259	10	IA	O	Exon length (bp)	506.845
OG0001260	26	IA	O	Exon length (bp)	682.059
OG0001265	40	IA	O	Exon length (bp)	252.274
OG0001266	42	IA	O	Exon length (bp)	1215.83
OG0001267	42	IA	O	Exon length (bp)	703.767
OG0001269	42	IA	O	Exon length (bp)	524.535
OG0001270	42	IA	O	Exon length (bp)	169.915
OG0001271	42	IA	O	Exon length (bp)	1569.49
OG0001272	40	IA	O	Exon length (bp)	1410.14
OG0001273	42	IA	O	Exon length (bp)	932.341
OG0001274	42	IA	O	Exon length (bp)	1016.73
OG0001275	40	IA	O	Exon length (bp)	336.818
OG0001276	41	IA	O	Exon length (bp)	1634.84
OG0001277	42	IA	O	Exon length (bp)	308.067
OG0001278	40	IA	O	Exon length (bp)	115.724
OG0001279	35	IA	O	Exon length (bp)	1018.54
OG0001281	40	IA	O	Exon length (bp)	567.538
OG0001282	38	IA	O	Exon length (bp)	1311.23
OG0001284	42	IA	O	Exon length (bp)	616.369
OG0001285	42	IA	O	Exon length (bp)	261.005
OG0001286	39	IA	O	Exon length (bp)	700.07
OG0001287	22	IA	O	Exon length (bp)	915.829
OG0001288	30	IA	O	Exon length (bp)	539.448
OG0001290	42	IA	O	Exon length (bp)	525.538
OG0001291	4	IA	O	Exon length (bp)	538.5
OG0001292	42	IA	O	Exon length (bp)	758.195
OG0001293	41	IA	O	Exon length (bp)	120.784
OG0001294	4	IA	O	Exon length (bp)	409.167
OG0001295	41	IA	O	Exon length (bp)	723.799
OG0001296	36	IA	O	Exon length (bp)	282.55
OG0001297	33	IA	O	Exon length (bp)	690.656
OG0001299	42	IA	O	Exon length (bp)	477.626
OG0001301	40	IA	O	Exon length (bp)	2820.65
OG0001302	37	IA	O	Exon length (bp)	422.647
OG0001303	42	IA	O	Exon length (bp)	465.771
OG0001304	34	IA	O	Exon length (bp)	1106.78
OG0001306	42	IA	O	Exon length (bp)	986.472
OG0001307	29	IA	O	Exon length (bp)	2685.85
OG0001308	13	IA	O	Exon length (bp)	868.383
OG0001309	35	IA	O	Exon length (bp)	281.163
OG0001310	42	IA	O	Exon length (bp)	526.459
OG0001311	42	IA	O	Exon length (bp)	535.073
OG0001313	42	IA	O	Exon length (bp)	364.108
OG0001314	42	IA	O	Exon length (bp)	2122.04
OG0001317	42	IA	O	Exon length (bp)	1047.53
OG0001318	42	IA	O	Exon length (bp)	896.533
OG0001319	21	IA	O	Exon length (bp)	1082.95
OG0001320	41	IA	O	Exon length (bp)	917.808
OG0001322	38	IA	O	Exon length (bp)	332.427
OG0001325	35	IA	O	Exon length (bp)	227.502
OG0001326	41	IA	O	Exon length (bp)	751.31
OG0001327	39	IA	O	Exon length (bp)	754.58
OG0001329	42	IA	O	Exon length (bp)	1098.52
OG0001330	42	IA	O	Exon length (bp)	1173.21
OG0001331	42	IA	O	Exon length (bp)	288.552
OG0001334	39	IA	O	Exon length (bp)	674.805
OG0001335	42	IA	O	Exon length (bp)	863.616
OG0001336	42	IA	O	Exon length (bp)	699.503
OG0001339	42	IA	O	Exon length (bp)	571.898
OG0001341	32	IA	O	Exon length (bp)	1778.15
OG0001342	38	IA	O	Exon length (bp)	257.054
OG0001343	41	IA	O	Exon length (bp)	447.066
OG0001345	42	IA	O	Exon length (bp)	238.239
OG0001346	42	IA	O	Exon length (bp)	512.233
OG0001347	41	IA	O	Exon length (bp)	487.573
OG0001349	42	IA	O	Exon length (bp)	936.565
OG0001350	42	IA	O	Exon length (bp)	690.387
OG0001351	42	IA	O	Exon length (bp)	1285.32
OG0001353	38	IA	O	Exon length (bp)	565.859
OG0001354	41	IA	O	Exon length (bp)	1937.38
OG0001355	41	IA	O	Exon length (bp)	2059.54
OG0001358	24	IA	O	Exon length (bp)	876.715
OG0001359	34	IA	O	Exon length (bp)	1324.18
OG0001360	34	IA	O	Exon length (bp)	1516.03
OG0001361	42	IA	O	Exon length (bp)	746.919
OG0001362	42	IA	O	Exon length (bp)	422.458
OG0001366	42	IA	O	Exon length (bp)	758.807
OG0001367	33	IA	O	Exon length (bp)	521.344
OG0001369	42	IA	O	Exon length (bp)	739.044
OG0001370	39	IA	O	Exon length (bp)	627.385
OG0001374	34	IA	O	Exon length (bp)	1619.95
OG0001375	40	IA	O	Exon length (bp)	1255.88
OG0001376	42	IA	O	Exon length (bp)	476.42
OG0001377	33	IA	O	Exon length (bp)	609.191
OG0001378	41	IA	O	Exon length (bp)	176.891
OG0001379	42	IA	O	Exon length (bp)	345.115
OG0001380	24	IA	O	Exon length (bp)	453.882
OG0001384	6	IA	O	Exon length (bp)	548.875
OG0001385	19	IA	O	Exon length (bp)	1225.11
OG0001387	26	IA	O	Exon length (bp)	732.028
OG0001388	42	IA	O	Exon length (bp)	1332.88
OG0001390	42	IA	O	Exon length (bp)	257.06
OG0001391	42	IA	O	Exon length (bp)	428.724
OG0001395	42	IA	O	Exon length (bp)	423.286
OG0001396	42	IA	O	Exon length (bp)	341.171
OG0001397	42	IA	O	Exon length (bp)	1270.63
OG0001398	41	IA	O	Exon length (bp)	155.79
OG0001399	30	IA	O	Exon length (bp)	271.337
OG0001400	40	IA	O	Exon length (bp)	754.804
OG0001402	42	IA	O	Exon length (bp)	526.759
OG0001404	41	IA	O	Exon length (bp)	722.223
OG0001405	42	IA	O	Exon length (bp)	953.299
OG0001406	42	IA	O	Exon length (bp)	1031.77
OG0001407	42	IA	O	Exon length (bp)	1207.68
OG0001408	42	IA	O	Exon length (bp)	712.241
OG0001409	42	IA	O	Exon length (bp)	4301.69
OG0001410	42	IA	O	Exon length (bp)	1216.23
OG0001411	39	IA	O	Exon length (bp)	163.425
OG0001412	42	IA	O	Exon length (bp)	219.673
OG0001413	42	IA	O	Exon length (bp)	419.68
OG0001414	37	IA	O	Exon length (bp)	265.939
OG0001416	42	IA	O	Exon length (bp)	699.38
OG0001417	42	IA	O	Exon length (bp)	454.207
OG0001419	26	IA	O	Exon length (bp)	517.241
OG0001420	41	IA	O	Exon length (bp)	1528.8
OG0001421	27	IA	O	Exon length (bp)	962.661
OG0001422	42	IA	O	Exon length (bp)	348.351
OG0001423	17	IA	O	Exon length (bp)	659.917
OG0001424	38	IA	O	Exon length (bp)	675.777
OG0001425	10	IA	O	Exon length (bp)	1720.81
OG0001426	42	IA	O	Exon length (bp)	1045.85
OG0001427	6	IA	O	Exon length (bp)	560.875
OG0001428	13	IA	O	Exon length (bp)	486.789
OG0001430	35	IA	O	Exon length (bp)	714.698
OG0001431	42	IA	O	Exon length (bp)	500.029
OG0001435	36	IA	O	Exon length (bp)	412.054
OG0001436	42	IA	O	Exon length (bp)	1120.15
OG0001437	42	IA	O	Exon length (bp)	356.035
OG0001438	38	IA	O	Exon length (bp)	781.875
OG0001439	40	IA	O	Exon length (bp)	313.503
OG0001440	41	IA	O	Exon length (bp)	515.492
OG0001441	42	IA	O	Exon length (bp)	430.687
OG0001442	40	IA	O	Exon length (bp)	244.243
OG0001445	15	IA	O	Exon length (bp)	418.558
OG0001446	42	IA	O	Exon length (bp)	1637.59
OG0001448	42	IA	O	Exon length (bp)	1853.89
OG0001450	42	IA	O	Exon length (bp)	2467.44
OG0001451	37	IA	O	Exon length (bp)	518.689
OG0001452	42	IA	O	Exon length (bp)	669.923
OG0001453	20	IA	O	Exon length (bp)	770.761
OG0001454	36	IA	O	Exon length (bp)	969.471
OG0001456	34	IA	O	Exon length (bp)	464.659
OG0001457	3	IA	O	Exon length (bp)	1186.5
OG0001458	41	IA	O	Exon length (bp)	248.231
OG0001459	39	IA	O	Exon length (bp)	1666.96
OG0001460	42	IA	O	Exon length (bp)	794.408
OG0001461	41	IA	O	Exon length (bp)	482.159
OG0001462	42	IA	O	Exon length (bp)	358.825
OG0001463	42	IA	O	Exon length (bp)	733.372
OG0001465	31	IA	O	Exon length (bp)	415.111
OG0001466	42	IA	O	Exon length (bp)	1728.37
OG0001468	39	IA	O	Exon length (bp)	649.779
OG0001472	41	IA	O	Exon length (bp)	815.395
OG0001473	41	IA	O	Exon length (bp)	715.191
OG0001474	41	IA	O	Exon length (bp)	734.424
OG0001475	38	IA	O	Exon length (bp)	859.68
OG0001476	18	IA	O	Exon length (bp)	728.826
OG0001477	42	IA	O	Exon length (bp)	1941.28
OG0001478	42	IA	O	Exon length (bp)	374.75
OG0001479	42	IA	O	Exon length (bp)	6790.59
OG0001480	38	IA	O	Exon length (bp)	745.041
OG0001481	42	IA	O	Exon length (bp)	3048.68
OG0001484	42	IA	O	Exon length (bp)	733.384
OG0001485	42	IA	O	Exon length (bp)	906.943
OG0001487	42	IA	O	Exon length (bp)	733.673
OG0001488	42	IA	O	Exon length (bp)	1064.54
OG0001489	38	IA	O	Exon length (bp)	1293.51
OG0001490	39	IA	O	Exon length (bp)	577.984
OG0001491	42	IA	O	Exon length (bp)	484.47
OG0001492	42	IA	O	Exon length (bp)	541.003
OG0001493	4	IA	O	Exon length (bp)	883.394
OG0001494	41	IA	O	Exon length (bp)	1110.31
OG0001495	42	IA	O	Exon length (bp)	770.312
OG0001496	36	IA	O	Exon length (bp)	1384.35
OG0001497	42	IA	O	Exon length (bp)	409.68
OG0001498	42	IA	O	Exon length (bp)	633.475
OG0001499	42	IA	O	Exon length (bp)	442.93
OG0001500	6	IA	O	Exon length (bp)	430.667
OG0001501	28	IA	O	Exon length (bp)	1838.08
OG0001502	42	IA	O	Exon length (bp)	837.197
OG0001503	40	IA	O	Exon length (bp)	1954.53
OG0001505	42	IA	O	Exon length (bp)	1687.72
OG0001506	42	IA	O	Exon length (bp)	780.319
OG0001507	41	IA	O	Exon length (bp)	1344.42
OG0001508	42	IA	O	Exon length (bp)	1282.56
OG0001509	40	IA	O	Exon length (bp)	486.688
OG0001510	41	IA	O	Exon length (bp)	1206.49
OG0001511	42	IA	O	Exon length (bp)	1674.95
OG0001512	40	IA	O	Exon length (bp)	361.995
OG0001514	42	IA	O	Exon length (bp)	1270.3
OG0001515	42	IA	O	Exon length (bp)	859.477
OG0001517	42	IA	O	Exon length (bp)	864.42
OG0001519	42	IA	O	Exon length (bp)	1251.34
OG0001520	42	IA	O	Exon length (bp)	606.064
OG0001521	42	IA	O	Exon length (bp)	260.305
OG0001522	15	IA	O	Exon length (bp)	892.018
OG0001524	14	IA	O	Exon length (bp)	590.408
OG0001526	12	IA	O	Exon length (bp)	561.071
OG0001527	42	IA	O	Exon length (bp)	228.366
OG0001528	41	IA	O	Exon length (bp)	265.357
OG0001529	41	IA	O	Exon length (bp)	361.545
OG0001530	42	IA	O	Exon length (bp)	825.532
OG0001531	41	IA	O	Exon length (bp)	1348.45
OG0001532	42	IA	O	Exon length (bp)	926.794
OG0001533	42	IA	O	Exon length (bp)	437.38
OG0001534	38	IA	O	Exon length (bp)	676.597
OG0001536	30	IA	O	Exon length (bp)	679.751
OG0001537	41	IA	O	Exon length (bp)	434.772
OG0001538	21	IA	O	Exon length (bp)	536.754
OG0001539	36	IA	O	Exon length (bp)	3128.86
OG0001541	18	IA	O	Exon length (bp)	787.281
OG0001542	14	IA	O	Exon length (bp)	984.589
OG0001543	41	IA	O	Exon length (bp)	227.489
OG0001544	41	IA	O	Exon length (bp)	1273.93
OG0001545	42	IA	O	Exon length (bp)	580.535
OG0001546	41	IA	O	Exon length (bp)	694.589
OG0001549	42	IA	O	Exon length (bp)	1051.24
OG0001550	39	IA	O	Exon length (bp)	318.632
OG0001551	38	IA	O	Exon length (bp)	604.095
OG0001553	41	IA	O	Exon length (bp)	106.508
OG0001554	42	IA	O	Exon length (bp)	3421.02
OG0001555	32	IA	O	Exon length (bp)	355.65
OG0001556	33	IA	O	Exon length (bp)	758.316
OG0001558	42	IA	O	Exon length (bp)	741.512
OG0001559	32	IA	O	Exon length (bp)	2121.43
OG0001560	41	IA	O	Exon length (bp)	742.73
OG0001562	42	IA	O	Exon length (bp)	1345.71
OG0001563	42	IA	O	Exon length (bp)	643.565
OG0001565	42	IA	O	Exon length (bp)	1573.1
OG0001566	29	IA	O	Exon length (bp)	1226.99
OG0001567	39	IA	O	Exon length (bp)	1754.61
OG0001569	41	IA	O	Exon length (bp)	992.598
OG0001570	42	IA	O	Exon length (bp)	252.647
OG0001571	42	IA	O	Exon length (bp)	964.781
OG0001572	33	IA	O	Exon length (bp)	535.304
OG0001573	36	IA	O	Exon length (bp)	1053.85
OG0001574	12	IA	O	Exon length (bp)	1002.32
OG0001575	42	IA	O	Exon length (bp)	1121.7
OG0001576	41	IA	O	Exon length (bp)	376.935
OG0001578	39	IA	O	Exon length (bp)	917.707
OG0001579	42	IA	O	Exon length (bp)	1362.9
OG0001580	42	IA	O	Exon length (bp)	595.957
OG0001581	42	IA	O	Exon length (bp)	548.939
OG0001582	42	IA	O	Exon length (bp)	1146.02
OG0001583	40	IA	O	Exon length (bp)	543.603
OG0001584	36	IA	O	Exon length (bp)	754.239
OG0001585	34	IA	O	Exon length (bp)	589.183
OG0001586	42	IA	O	Exon length (bp)	815.848
OG0001587	41	IA	O	Exon length (bp)	633.133
OG0001588	41	IA	O	Exon length (bp)	940.682
OG0001589	42	IA	O	Exon length (bp)	1048.84
OG0001590	14	IA	O	Exon length (bp)	230.545
OG0001591	41	IA	O	Exon length (bp)	525.411
OG0001592	42	IA	O	Exon length (bp)	526.408
OG0001593	32	IA	O	Exon length (bp)	481.827
OG0001594	15	IA	O	Exon length (bp)	1104.74
OG0001595	42	IA	O	Exon length (bp)	595.608
OG0001596	42	IA	O	Exon length (bp)	1541.05
OG0001597	39	IA	O	Exon length (bp)	1033.51
OG0001598	28	IA	O	Exon length (bp)	965.149
OG0001600	42	IA	O	Exon length (bp)	1615.55
OG0001601	41	IA	O	Exon length (bp)	420.578
OG0001603	42	IA	O	Exon length (bp)	564.928
OG0001605	41	IA	O	Exon length (bp)	1187.59
OG0001606	42	IA	O	Exon length (bp)	695.67
OG0001607	41	IA	O	Exon length (bp)	801.321
OG0001608	40	IA	O	Exon length (bp)	412.436
OG0001610	40	IA	O	Exon length (bp)	1252.5
OG0001611	33	IA	O	Exon length (bp)	447.28
OG0001613	25	IA	O	Exon length (bp)	577.062
OG0001615	42	IA	O	Exon length (bp)	1325.24
OG0001616	42	IA	O	Exon length (bp)	474.043
OG0001617	40	IA	O	Exon length (bp)	1297.85
OG0001618	41	IA	O	Exon length (bp)	672.844
OG0001619	42	IA	O	Exon length (bp)	961.14
OG0001620	39	IA	O	Exon length (bp)	519.706
OG0001621	29	IA	O	Exon length (bp)	1213.45
OG0001623	24	IA	O	Exon length (bp)	807.95
OG0001624	42	IA	O	Exon length (bp)	341.305
OG0001625	42	IA	O	Exon length (bp)	175.129
OG0001626	42	IA	O	Exon length (bp)	331.427
OG0001628	42	IA	O	Exon length (bp)	1136.75
OG0001631	6	IA	O	Exon length (bp)	392.458
OG0001632	39	IA	O	Exon length (bp)	119.045
OG0001633	40	IA	O	Exon length (bp)	838.311
OG0001634	42	IA	O	Exon length (bp)	985.256
OG0001635	41	IA	O	Exon length (bp)	570.014
OG0001636	42	IA	O	Exon length (bp)	852.707
OG0001639	39	IA	O	Exon length (bp)	234.684
OG0001640	41	IA	O	Exon length (bp)	532.59
OG0001641	19	IA	O	Exon length (bp)	870.867
OG0001642	42	IA	O	Exon length (bp)	325.522
OG0001643	42	IA	O	Exon length (bp)	3067.84
OG0001645	41	IA	O	Exon length (bp)	539.7
OG0001646	41	IA	O	Exon length (bp)	547.032
OG0001647	20	IA	O	Exon length (bp)	1690.85
OG0001648	41	IA	O	Exon length (bp)	146.657
OG0001650	42	IA	O	Exon length (bp)	416.021
OG0001651	36	IA	O	Exon length (bp)	1032.97
OG0001652	42	IA	O	Exon length (bp)	827.904
OG0001653	42	IA	O	Exon length (bp)	796.142
OG0001654	42	IA	O	Exon length (bp)	1709.18
OG0001656	42	IA	O	Exon length (bp)	1167.75
OG0001659	42	IA	O	Exon length (bp)	496.274
OG0001660	41	IA	O	Exon length (bp)	1080.64
OG0001661	42	IA	O	Exon length (bp)	542.989
OG0001662	42	IA	O	Exon length (bp)	1034.61
OG0001664	4	IA	O	Exon length (bp)	755.75
OG0001665	40	IA	O	Exon length (bp)	289.386
OG0001666	35	IA	O	Exon length (bp)	1304.97
OG0001667	42	IA	O	Exon length (bp)	484.069
OG0001668	36	IA	O	Exon length (bp)	414.632
OG0001669	42	IA	O	Exon length (bp)	446.886
OG0001671	42	IA	O	Exon length (bp)	1119.84
OG0001673	42	IA	O	Exon length (bp)	1770.11
OG0001675	42	IA	O	Exon length (bp)	669.844
OG0001676	41	IA	O	Exon length (bp)	436.84
OG0001678	41	IA	O	Exon length (bp)	825.737
OG0001679	42	IA	O	Exon length (bp)	1274.57
OG0001680	42	IA	O	Exon length (bp)	632.599
OG0001682	42	IA	O	Exon length (bp)	1086.37
OG0001683	40	IA	O	Exon length (bp)	1254.49
OG0001684	42	IA	O	Exon length (bp)	430.349
OG0001685	42	IA	O	Exon length (bp)	560.915
OG0001687	42	IA	O	Exon length (bp)	1552.29
OG0001688	39	IA	O	Exon length (bp)	414.433
OG0001689	23	IA	O	Exon length (bp)	335.164
OG0001690	20	IA	O	Exon length (bp)	674.266
OG0001692	42	IA	O	Exon length (bp)	365.713
OG0001694	41	IA	O	Exon length (bp)	403.897
OG0001698	42	IA	O	Exon length (bp)	1151.13
OG0001699	42	IA	O	Exon length (bp)	129.027
OG0001701	1	IA	O	Exon length (bp)	1335
OG0001702	42	IA	O	Exon length (bp)	548.574
OG0001704	15	IA	O	Exon length (bp)	866.725
OG0001705	21	IA	O	Exon length (bp)	637.279
OG0001708	41	IA	O	Exon length (bp)	273.531
OG0001709	41	IA	O	Exon length (bp)	1060.17
OG0001710	42	IA	O	Exon length (bp)	493.167
OG0001711	35	IA	O	Exon length (bp)	344.645
OG0001712	35	IA	O	Exon length (bp)	564.515
OG0001714	23	IA	O	Exon length (bp)	878.202
OG0001715	42	IA	O	Exon length (bp)	1057.68
OG0001717	42	IA	O	Exon length (bp)	561.638
OG0001718	34	IA	O	Exon length (bp)	703.652
OG0001719	1	IA	O	Exon length (bp)	1341
OG0001720	42	IA	O	Exon length (bp)	1176.53
OG0001721	42	IA	O	Exon length (bp)	1107.04
OG0001722	42	IA	O	Exon length (bp)	253.781
OG0001723	42	IA	O	Exon length (bp)	979.721
OG0001726	41	IA	O	Exon length (bp)	799.802
OG0001727	41	IA	O	Exon length (bp)	380.012
OG0001728	42	IA	O	Exon length (bp)	657.744
OG0001730	42	IA	O	Exon length (bp)	423.218
OG0001731	37	IA	O	Exon length (bp)	1011.2
OG0001733	40	IA	O	Exon length (bp)	387.624
OG0001734	42	IA	O	Exon length (bp)	950.704
OG0001735	8	IA	O	Exon length (bp)	1111.77
OG0001738	42	IA	O	Exon length (bp)	154.488
OG0001740	41	IA	O	Exon length (bp)	169.78
OG0001741	42	IA	O	Exon length (bp)	409.143
OG0001742	12	IA	O	Exon length (bp)	288.375
OG0001743	42	IA	O	Exon length (bp)	721.375
OG0001744	37	IA	O	Exon length (bp)	724.474
OG0001745	42	IA	O	Exon length (bp)	1185.82
OG0001747	13	IA	O	Exon length (bp)	551.691
OG0001748	40	IA	O	Exon length (bp)	293.416
OG0001749	41	IA	O	Exon length (bp)	655.257
OG0001750	42	IA	O	Exon length (bp)	583.107
OG0001752	41	IA	O	Exon length (bp)	946.782
OG0001753	42	IA	O	Exon length (bp)	703.918
OG0001754	41	IA	O	Exon length (bp)	799.08
OG0001755	20	IA	O	Exon length (bp)	520.404
OG0001756	41	IA	O	Exon length (bp)	1949.96
OG0001757	41	IA	O	Exon length (bp)	2376.15
OG0001758	40	IA	O	Exon length (bp)	240.719
OG0001759	42	IA	O	Exon length (bp)	134.169
OG0001760	41	IA	O	Exon length (bp)	447.864
OG0001761	41	IA	O	Exon length (bp)	1896.44
OG0001762	42	IA	O	Exon length (bp)	2568.18
OG0001763	41	IA	O	Exon length (bp)	475.099
OG0001764	16	IA	O	Exon length (bp)	385.53
OG0001765	42	IA	O	Exon length (bp)	1615.57
OG0001766	42	IA	O	Exon length (bp)	1313.82
OG0001767	42	IA	O	Exon length (bp)	3391.25
OG0001768	42	IA	O	Exon length (bp)	226.503
OG0001769	40	IA	O	Exon length (bp)	388.65
OG0001770	42	IA	O	Exon length (bp)	483.791
OG0001772	18	IA	O	Exon length (bp)	432.735
OG0001774	42	IA	O	Exon length (bp)	1379.41
OG0001777	25	IA	O	Exon length (bp)	487.357
OG0001780	39	IA	O	Exon length (bp)	499.848
OG0001781	42	IA	O	Exon length (bp)	1788.96
OG0001782	20	IA	O	Exon length (bp)	2824.5
OG0001784	42	IA	O	Exon length (bp)	546.744
OG0001786	42	IA	O	Exon length (bp)	1518.39
OG0001790	42	IA	O	Exon length (bp)	1107.41
OG0001791	38	IA	O	Exon length (bp)	389.098
OG0001792	39	IA	O	Exon length (bp)	502.901
OG0001794	42	IA	O	Exon length (bp)	2691.37
OG0001799	42	IA	O	Exon length (bp)	1792.87
OG0001801	42	IA	O	Exon length (bp)	1069.11
OG0001802	40	IA	O	Exon length (bp)	852.477
OG0001803	39	IA	O	Exon length (bp)	656.526
OG0001804	41	IA	O	Exon length (bp)	368.375
OG0001805	40	IA	O	Exon length (bp)	408.431
OG0001806	42	IA	O	Exon length (bp)	1498.84
OG0001807	42	IA	O	Exon length (bp)	290.186
OG0001808	41	IA	O	Exon length (bp)	373.231
OG0001809	42	IA	O	Exon length (bp)	941.677
OG0001810	11	IA	O	Exon length (bp)	272.273
OG0001811	35	IA	O	Exon length (bp)	709.77
OG0001812	41	IA	O	Exon length (bp)	598.404
OG0001813	42	IA	O	Exon length (bp)	965.342
OG0001814	42	IA	O	Exon length (bp)	932.488
OG0001815	42	IA	O	Exon length (bp)	400.009
OG0001816	41	IA	O	Exon length (bp)	630.491
OG0001817	19	IA	O	Exon length (bp)	849.047
OG0001818	19	IA	O	Exon length (bp)	2530.65
OG0001819	42	IA	O	Exon length (bp)	925.818
OG0001820	42	IA	O	Exon length (bp)	1014.72
OG0001821	39	IA	O	Exon length (bp)	864.373
OG0001822	11	IA	O	Exon length (bp)	1413.98
OG0001823	42	IA	O	Exon length (bp)	570.695
OG0001824	41	IA	O	Exon length (bp)	1029.62
OG0001825	16	IA	O	Exon length (bp)	680.004
OG0001827	42	IA	O	Exon length (bp)	561.831
OG0001828	40	IA	O	Exon length (bp)	202.128
OG0001830	39	IA	O	Exon length (bp)	823.166
OG0001831	35	IA	O	Exon length (bp)	1114.26
OG0001832	42	IA	O	Exon length (bp)	1091.89
OG0001833	41	IA	O	Exon length (bp)	363
OG0001834	34	IA	O	Exon length (bp)	734.213
OG0001839	41	IA	O	Exon length (bp)	289.376
OG0001840	41	IA	O	Exon length (bp)	532.808
OG0001842	42	IA	O	Exon length (bp)	154.118
OG0001844	42	IA	O	Exon length (bp)	832.512
OG0001845	42	IA	O	Exon length (bp)	643.804
OG0001846	42	IA	O	Exon length (bp)	1767.31
OG0001848	39	IA	O	Exon length (bp)	1410.79
OG0001849	37	IA	O	Exon length (bp)	455.375
OG0001850	39	IA	O	Exon length (bp)	1252.49
OG0001851	41	IA	O	Exon length (bp)	744.609
OG0001853	42	IA	O	Exon length (bp)	2303.55
OG0001856	42	IA	O	Exon length (bp)	820.501
OG0001857	42	IA	O	Exon length (bp)	968.162
OG0001859	41	IA	O	Exon length (bp)	605.463
OG0001860	42	IA	O	Exon length (bp)	352.242
OG0001861	42	IA	O	Exon length (bp)	2028.74
OG0001862	42	IA	O	Exon length (bp)	1531.43
OG0001863	35	IA	O	Exon length (bp)	636.557
OG0001864	42	IA	O	Exon length (bp)	264.933
OG0001865	38	IA	O	Exon length (bp)	296.936
OG0001866	39	IA	O	Exon length (bp)	278.428
OG0001867	42	IA	O	Exon length (bp)	217.371
OG0001868	42	IA	O	Exon length (bp)	294.234
OG0001869	41	IA	O	Exon length (bp)	2647.37
OG0001870	42	IA	O	Exon length (bp)	2452.14
OG0001871	33	IA	O	Exon length (bp)	295.218
OG0001872	36	IA	O	Exon length (bp)	656.964
OG0001873	42	IA	O	Exon length (bp)	1047.94
OG0001874	42	IA	O	Exon length (bp)	213.71
OG0001875	42	IA	O	Exon length (bp)	506.427
OG0001876	41	IA	O	Exon length (bp)	193.425
OG0001877	42	IA	O	Exon length (bp)	365.787
OG0001878	35	IA	O	Exon length (bp)	1245.94
OG0001879	38	IA	O	Exon length (bp)	511.953
OG0001880	37	IA	O	Exon length (bp)	778.545
OG0001881	33	IA	O	Exon length (bp)	827.754
OG0001883	38	IA	O	Exon length (bp)	295.443
OG0001884	40	IA	O	Exon length (bp)	800.67
OG0001886	42	IA	O	Exon length (bp)	258.149
OG0001887	41	IA	O	Exon length (bp)	341.085
OG0001888	42	IA	O	Exon length (bp)	554.192
OG0001889	41	IA	O	Exon length (bp)	1530.66
OG0001890	41	IA	O	Exon length (bp)	991.037
OG0001891	41	IA	O	Exon length (bp)	368.549
OG0001893	34	IA	O	Exon length (bp)	750.8
OG0001895	40	IA	O	Exon length (bp)	507.601
OG0001896	32	IA	O	Exon length (bp)	321.388
OG0001897	41	IA	O	Exon length (bp)	517.825
OG0001898	42	IA	O	Exon length (bp)	186.441
OG0001899	42	IA	O	Exon length (bp)	1989.76
OG0001900	41	IA	O	Exon length (bp)	1458.09
OG0001901	42	IA	O	Exon length (bp)	649.4
OG0001902	42	IA	O	Exon length (bp)	321.007
OG0001903	8	IA	O	Exon length (bp)	677.867
OG0001907	41	IA	O	Exon length (bp)	2722.05
OG0001908	42	IA	O	Exon length (bp)	1811.45
OG0001909	42	IA	O	Exon length (bp)	526.591
OG0001911	31	IA	O	Exon length (bp)	527.515
OG0001912	42	IA	O	Exon length (bp)	620.609
OG0001913	32	IA	O	Exon length (bp)	1019.06
OG0001914	41	IA	O	Exon length (bp)	324.03
OG0001915	42	IA	O	Exon length (bp)	335.987
OG0001916	41	IA	O	Exon length (bp)	1071.57
OG0001917	41	IA	O	Exon length (bp)	1531.42
OG0001919	42	IA	O	Exon length (bp)	1564.57
OG0001920	42	IA	O	Exon length (bp)	787
OG0001921	42	IA	O	Exon length (bp)	621.453
OG0001922	41	IA	O	Exon length (bp)	292.191
OG0001923	42	IA	O	Exon length (bp)	3263.49
OG0001924	28	IA	O	Exon length (bp)	2105.63
OG0001925	42	IA	O	Exon length (bp)	694.572
OG0001926	41	IA	O	Exon length (bp)	873.638
OG0001927	41	IA	O	Exon length (bp)	432.15
OG0001928	42	IA	O	Exon length (bp)	1699.51
OG0001929	41	IA	O	Exon length (bp)	1140.56
OG0001930	40	IA	O	Exon length (bp)	1890.03
OG0001931	41	IA	O	Exon length (bp)	277.954
OG0001932	42	IA	O	Exon length (bp)	453.484
OG0001934	42	IA	O	Exon length (bp)	631.848
OG0001935	41	IA	O	Exon length (bp)	580.562
OG0001937	42	IA	O	Exon length (bp)	2502
OG0001938	41	IA	O	Exon length (bp)	786.801
OG0001939	40	IA	O	Exon length (bp)	1136.89
OG0001940	42	IA	O	Exon length (bp)	2119.5
OG0001941	37	IA	O	Exon length (bp)	1251.18
OG0001942	42	IA	O	Exon length (bp)	489.505
OG0001943	5	IA	O	Exon length (bp)	958
OG0001945	41	IA	O	Exon length (bp)	957.506
OG0001946	42	IA	O	Exon length (bp)	595.793
OG0001947	42	IA	O	Exon length (bp)	711.379
OG0001948	42	IA	O	Exon length (bp)	222.339
OG0001949	42	IA	O	Exon length (bp)	525.856
OG0001950	37	IA	O	Exon length (bp)	596.221
OG0001951	42	IA	O	Exon length (bp)	211.489
OG0001952	42	IA	O	Exon length (bp)	3648.91
OG0001953	42	IA	O	Exon length (bp)	2459.98
OG0001955	34	IA	O	Exon length (bp)	790.754
OG0001956	41	IA	O	Exon length (bp)	621.125
OG0001957	36	IA	O	Exon length (bp)	915.083
OG0001958	42	IA	O	Exon length (bp)	139.522
OG0001959	42	IA	O	Exon length (bp)	1656.49
OG0001961	36	IA	O	Exon length (bp)	353.351
OG0001963	42	IA	O	Exon length (bp)	157.438
OG0001964	42	IA	O	Exon length (bp)	1469.29
OG0001965	40	IA	O	Exon length (bp)	544.414
OG0001966	42	IA	O	Exon length (bp)	1190.13
OG0001967	42	IA	O	Exon length (bp)	553.026
OG0001968	42	IA	O	Exon length (bp)	854.924
OG0001969	40	IA	O	Exon length (bp)	1087.24
OG0001970	36	IA	O	Exon length (bp)	1107.66
OG0001972	42	IA	O	Exon length (bp)	997.232
OG0001973	18	IA	O	Exon length (bp)	1219.52
OG0001974	41	IA	O	Exon length (bp)	778.371
OG0001975	15	IA	O	Exon length (bp)	657.458
OG0001976	41	IA	O	Exon length (bp)	2494.7
OG0001977	41	IA	O	Exon length (bp)	1127.11
OG0001979	42	IA	O	Exon length (bp)	504.898
OG0001980	42	IA	O	Exon length (bp)	212.947
OG0001981	41	IA	O	Exon length (bp)	1996.1
OG0001982	42	IA	O	Exon length (bp)	1642.2
OG0001983	42	IA	O	Exon length (bp)	237.569
OG0001985	42	IA	O	Exon length (bp)	599.815
OG0001986	42	IA	O	Exon length (bp)	344.685
OG0001987	42	IA	O	Exon length (bp)	1090.93
OG0001990	42	IA	O	Exon length (bp)	2566.23
OG0001992	42	IA	O	Exon length (bp)	373.005
OG0001993	42	IA	O	Exon length (bp)	186.612
OG0001994	42	IA	O	Exon length (bp)	1223.29
OG0001995	42	IA	O	Exon length (bp)	196.438
OG0001996	42	IA	O	Exon length (bp)	519
OG0001997	42	IA	O	Exon length (bp)	1261.57
OG0001998	42	IA	O	Exon length (bp)	192.883
OG0001999	42	IA	O	Exon length (bp)	709.001
OG0002001	41	IA	O	Exon length (bp)	2617.42
OG0002002	42	IA	O	Exon length (bp)	1207.94
OG0002003	42	IA	O	Exon length (bp)	662.441
OG0002004	42	IA	O	Exon length (bp)	677.638
OG0002006	42	IA	O	Exon length (bp)	378.921
OG0002007	42	IA	O	Exon length (bp)	4012.14
OG0002008	40	IA	O	Exon length (bp)	713.452
OG0002009	42	IA	O	Exon length (bp)	572.978
OG0002010	42	IA	O	Exon length (bp)	521.905
OG0002011	42	IA	O	Exon length (bp)	1120.13
OG0002012	35	IA	O	Exon length (bp)	839.759
OG0002013	41	IA	O	Exon length (bp)	737.067
OG0002014	41	IA	O	Exon length (bp)	605.244
OG0002015	42	IA	O	Exon length (bp)	911.031
OG0002016	42	IA	O	Exon length (bp)	342.732
OG0002017	42	IA	O	Exon length (bp)	1495.17
OG0002018	42	IA	O	Exon length (bp)	3442.09
OG0002019	39	IA	O	Exon length (bp)	1036.78
OG0002020	42	IA	O	Exon length (bp)	1022.38
OG0002021	42	IA	O	Exon length (bp)	951
OG0002022	42	IA	O	Exon length (bp)	1683.88
OG0002023	42	IA	O	Exon length (bp)	1274.93
OG0002024	42	IA	O	Exon length (bp)	231.298
OG0002026	41	IA	O	Exon length (bp)	1351.48
OG0002027	42	IA	O	Exon length (bp)	1165.85
OG0002029	42	IA	O	Exon length (bp)	535.951
OG0002031	42	IA	O	Exon length (bp)	1414.9
OG0002032	42	IA	O	Exon length (bp)	1470.87
OG0002033	42	IA	O	Exon length (bp)	174.642
OG0002034	27	IA	O	Exon length (bp)	869.658
OG0002035	42	IA	O	Exon length (bp)	957.571
OG0002036	42	IA	O	Exon length (bp)	471.273
OG0002037	42	IA	O	Exon length (bp)	1887.88
OG0002038	42	IA	O	Exon length (bp)	1176.76
OG0002039	42	IA	O	Exon length (bp)	399.871
OG0002040	41	IA	O	Exon length (bp)	1682.25
OG0002041	42	IA	O	Exon length (bp)	1086.4
OG0002042	42	IA	O	Exon length (bp)	329.893
OG0002043	35	IA	O	Exon length (bp)	809.879
OG0002045	41	IA	O	Exon length (bp)	1033.92
OG0002046	42	IA	O	Exon length (bp)	630.851
OG0002048	42	IA	O	Exon length (bp)	1216.23
OG0002051	42	IA	O	Exon length (bp)	182.571
OG0002053	42	IA	O	Exon length (bp)	7599.13
OG0002054	25	IA	O	Exon length (bp)	772.083
OG0002055	42	IA	O	Exon length (bp)	325.261
OG0002058	27	IA	O	Exon length (bp)	1904.13
OG0002059	42	IA	O	Exon length (bp)	1136.23
OG0002061	41	IA	O	Exon length (bp)	644.957
OG0002062	41	IA	O	Exon length (bp)	332.043
OG0002063	39	IA	O	Exon length (bp)	800.856
OG0002064	42	IA	O	Exon length (bp)	704.005
OG0002065	8	IA	O	Exon length (bp)	551.562
OG0002066	42	IA	O	Exon length (bp)	1640.21
OG0002067	42	IA	O	Exon length (bp)	808.005
OG0002068	42	IA	O	Exon length (bp)	2307.26
OG0002069	42	IA	O	Exon length (bp)	335.226
OG0002070	42	IA	O	Exon length (bp)	2030.18
OG0002071	42	IA	O	Exon length (bp)	1689.44
OG0002072	42	IA	O	Exon length (bp)	311.165
OG0002073	42	IA	O	Exon length (bp)	1026.84
OG0002074	42	IA	O	Exon length (bp)	696.486
OG0002075	42	IA	O	Exon length (bp)	1242.84
OG0002076	42	IA	O	Exon length (bp)	143.61
OG0002077	42	IA	O	Exon length (bp)	6799.4
OG0002078	42	IA	O	Exon length (bp)	4705.74
OG0002079	40	IA	O	Exon length (bp)	916.897
OG0002080	42	IA	O	Exon length (bp)	897.345
OG0002081	35	IA	O	Exon length (bp)	691.226
OG0002083	41	IA	O	Exon length (bp)	1324.12
OG0002084	42	IA	O	Exon length (bp)	441.899
OG0002085	42	IA	O	Exon length (bp)	92.4451
OG0002086	31	IA	O	Exon length (bp)	1091.66
OG0002087	36	IA	O	Exon length (bp)	457.054
OG0002088	42	IA	O	Exon length (bp)	3978.55
OG0002089	42	IA	O	Exon length (bp)	492.685
OG0002090	41	IA	O	Exon length (bp)	1764.11
OG0002093	42	IA	O	Exon length (bp)	124.179
OG0002094	36	IA	O	Exon length (bp)	1585.09
OG0002095	41	IA	O	Exon length (bp)	320.209
OG0002096	40	IA	O	Exon length (bp)	987.407
OG0002097	42	IA	O	Exon length (bp)	843.343
OG0002098	42	IA	O	Exon length (bp)	301.74
OG0002099	42	IA	O	Exon length (bp)	1011.02
OG0002100	42	IA	O	Exon length (bp)	176.397
OG0002101	42	IA	O	Exon length (bp)	781.634
OG0002102	42	IA	O	Exon length (bp)	712.061
OG0002103	41	IA	O	Exon length (bp)	1698.24
OG0002104	41	IA	O	Exon length (bp)	1339.63
OG0002105	40	IA	O	Exon length (bp)	1666.71
OG0002106	42	IA	O	Exon length (bp)	723.543
OG0002107	38	IA	O	Exon length (bp)	1198.02
OG0002109	31	IA	O	Exon length (bp)	576.801
OG0002112	42	IA	O	Exon length (bp)	1299.46
OG0002113	42	IA	O	Exon length (bp)	385.835
OG0002114	42	IA	O	Exon length (bp)	222.818
OG0002115	42	IA	O	Exon length (bp)	534.02
OG0002116	42	IA	O	Exon length (bp)	1665.5
OG0002117	42	IA	O	Exon length (bp)	395.232
OG0002118	29	IA	O	Exon length (bp)	378.375
OG0002119	36	IA	O	Exon length (bp)	186.456
OG0002120	41	IA	O	Exon length (bp)	442.835
OG0002121	30	IA	O	Exon length (bp)	1490.14
OG0002122	42	IA	O	Exon length (bp)	192.448
OG0002123	42	IA	O	Exon length (bp)	943.506
OG0002124	42	IA	O	Exon length (bp)	487.177
OG0002125	42	IA	O	Exon length (bp)	359.819
OG0002127	42	IA	O	Exon length (bp)	2315.45
OG0002128	42	IA	O	Exon length (bp)	130.366
OG0002129	42	IA	O	Exon length (bp)	538.643
OG0002131	41	IA	O	Exon length (bp)	421.329
OG0002132	41	IA	O	Exon length (bp)	1917.88
OG0002133	41	IA	O	Exon length (bp)	3662.88
OG0002134	42	IA	O	Exon length (bp)	2876.93
OG0002135	42	IA	O	Exon length (bp)	672.829
OG0002136	42	IA	O	Exon length (bp)	2201.52
OG0002137	41	IA	O	Exon length (bp)	875.922
OG0002138	42	IA	O	Exon length (bp)	602.565
OG0002139	42	IA	O	Exon length (bp)	2804.3
OG0002140	42	IA	O	Exon length (bp)	1213.16
OG0002141	11	IA	O	Exon length (bp)	918.682
OG0002142	1	IA	O	Exon length (bp)	423
OG0002143	42	IA	O	Exon length (bp)	3596.07
OG0002144	42	IA	O	Exon length (bp)	918.499
OG0002145	39	IA	O	Exon length (bp)	1100.95
OG0002146	42	IA	O	Exon length (bp)	619.879
OG0002147	38	IA	O	Exon length (bp)	1105.5
OG0002148	42	IA	O	Exon length (bp)	249.522
OG0002149	40	IA	O	Exon length (bp)	340.275
OG0002150	13	IA	O	Exon length (bp)	1017.77
OG0002151	40	IA	O	Exon length (bp)	453.333
OG0002152	41	IA	O	Exon length (bp)	594.066
OG0002153	42	IA	O	Exon length (bp)	2423.11
OG0002154	41	IA	O	Exon length (bp)	1045.51
OG0002155	42	IA	O	Exon length (bp)	578.871
OG0002156	42	IA	O	Exon length (bp)	2175.89
OG0002157	42	IA	O	Exon length (bp)	4732.84
OG0002158	41	IA	O	Exon length (bp)	694.005
OG0002159	42	IA	O	Exon length (bp)	727.398
OG0002161	42	IA	O	Exon length (bp)	3515.12
OG0002163	1	IA	O	Exon length (bp)	1251
OG0002164	42	IA	O	Exon length (bp)	3134.1
OG0002165	42	IA	O	Exon length (bp)	1978.84
OG0002166	42	IA	O	Exon length (bp)	745.849
OG0002167	41	IA	O	Exon length (bp)	679.023
OG0002168	40	IA	O	Exon length (bp)	1511.68
OG0002169	41	IA	O	Exon length (bp)	2783.9
OG0002170	42	IA	O	Exon length (bp)	390.327
OG0002171	42	IA	O	Exon length (bp)	856.849
OG0002172	42	IA	O	Exon length (bp)	409.779
OG0002173	41	IA	O	Exon length (bp)	1012.35
OG0002174	42	IA	O	Exon length (bp)	1254.64
OG0002176	42	IA	O	Exon length (bp)	1607.23
OG0002177	42	IA	O	Exon length (bp)	742.305
OG0002178	41	IA	O	Exon length (bp)	1042.69
OG0002179	42	IA	O	Exon length (bp)	335.889
OG0002180	42	IA	O	Exon length (bp)	1180.52
OG0002183	26	IA	O	Exon length (bp)	565.684
OG0002184	42	IA	O	Exon length (bp)	864.949
OG0002185	42	IA	O	Exon length (bp)	651.465
OG0002186	42	IA	O	Exon length (bp)	310.506
OG0002187	42	IA	O	Exon length (bp)	1173.1
OG0002190	41	IA	O	Exon length (bp)	887
OG0002191	42	IA	O	Exon length (bp)	2069.63
OG0002192	42	IA	O	Exon length (bp)	1121.31
OG0002193	42	IA	O	Exon length (bp)	1304.24
OG0002194	42	IA	O	Exon length (bp)	3215.45
OG0002195	42	IA	O	Exon length (bp)	1909.93
OG0002196	42	IA	O	Exon length (bp)	1079.11
OG0002197	39	IA	O	Exon length (bp)	1635.79
OG0002198	42	IA	O	Exon length (bp)	1397.51
OG0002199	42	IA	O	Exon length (bp)	2878.79
OG0002200	4	IA	O	Exon length (bp)	447.75
OG0002201	42	IA	O	Exon length (bp)	1554.24
OG0002202	42	IA	O	Exon length (bp)	1796.96
OG0002203	39	IA	O	Exon length (bp)	287.194
OG0002204	37	IA	O	Exon length (bp)	278.918
OG0002205	38	IA	O	Exon length (bp)	513.677
OG0002206	41	IA	O	Exon length (bp)	993.459
OG0002207	41	IA	O	Exon length (bp)	529.338
OG0002208	42	IA	O	Exon length (bp)	1585.19
OG0002209	42	IA	O	Exon length (bp)	757.75
OG0002210	41	IA	O	Exon length (bp)	545.425
OG0002212	42	IA	O	Exon length (bp)	1061.83
OG0002213	42	IA	O	Exon length (bp)	3961.2
OG0002214	42	IA	O	Exon length (bp)	1636.76
OG0002215	42	IA	O	Exon length (bp)	1870.8
OG0002216	42	IA	O	Exon length (bp)	886.571
OG0002217	42	IA	O	Exon length (bp)	1171.82
OG0002218	41	IA	O	Exon length (bp)	2484.65
OG0002219	41	IA	O	Exon length (bp)	469.685
OG0002220	41	IA	O	Exon length (bp)	720.101
OG0002221	42	IA	O	Exon length (bp)	549.993
OG0002222	41	IA	O	Exon length (bp)	160.387
OG0002224	42	IA	O	Exon length (bp)	439.115
OG0002225	42	IA	O	Exon length (bp)	2106.93
OG0002226	42	IA	O	Exon length (bp)	1297.13
OG0002227	42	IA	O	Exon length (bp)	1097.34
OG0002228	42	IA	O	Exon length (bp)	1848.56
OG0002229	42	IA	O	Exon length (bp)	1144.34
OG0002230	42	IA	O	Exon length (bp)	887.07
OG0002231	42	IA	O	Exon length (bp)	974.098
OG0002232	41	IA	O	Exon length (bp)	1030.15
OG0002233	42	IA	O	Exon length (bp)	1165.72
OG0002234	40	IA	O	Exon length (bp)	1296.65
OG0002235	42	IA	O	Exon length (bp)	2508.52
OG0002236	42	IA	O	Exon length (bp)	1043.7
OG0002237	42	IA	O	Exon length (bp)	915.64
OG0002238	42	IA	O	Exon length (bp)	2223.31
OG0002239	42	IA	O	Exon length (bp)	1060.16
OG0002240	42	IA	O	Exon length (bp)	943.733
OG0002241	42	IA	O	Exon length (bp)	3397.81
OG0002242	39	IA	O	Exon length (bp)	140.314
OG0002243	37	IA	O	Exon length (bp)	832.958
OG0002244	42	IA	O	Exon length (bp)	344.348
OG0002245	42	IA	O	Exon length (bp)	2368.99
OG0002246	42	IA	O	Exon length (bp)	3037.32
OG0002247	41	IA	O	Exon length (bp)	1947.92
OG0002249	42	IA	O	Exon length (bp)	2021.22
OG0002250	41	IA	O	Exon length (bp)	575.621
OG0002251	42	IA	O	Exon length (bp)	264.075
OG0002252	42	IA	O	Exon length (bp)	436.984
OG0002253	42	IA	O	Exon length (bp)	1249.33
OG0002254	41	IA	O	Exon length (bp)	1889.69
OG0002255	42	IA	O	Exon length (bp)	1375.06
OG0002256	42	IA	O	Exon length (bp)	530.981
OG0002258	42	IA	O	Exon length (bp)	507.104
OG0002259	42	IA	O	Exon length (bp)	1549.55
OG0002260	42	IA	O	Exon length (bp)	648.006
OG0002261	42	IA	O	Exon length (bp)	1781.07
OG0002262	42	IA	O	Exon length (bp)	2453.29
OG0002263	42	IA	O	Exon length (bp)	1498.15
OG0002264	42	IA	O	Exon length (bp)	1751.54
OG0002265	36	IA	O	Exon length (bp)	737.603
OG0002266	41	IA	O	Exon length (bp)	381.994
OG0002267	42	IA	O	Exon length (bp)	3360.6
OG0002268	41	IA	O	Exon length (bp)	917.72
OG0002269	42	IA	O	Exon length (bp)	1548.59
OG0002270	42	IA	O	Exon length (bp)	278.767
OG0002271	42	IA	O	Exon length (bp)	1928.73
OG0002272	42	IA	O	Exon length (bp)	1257.86
OG0002273	42	IA	O	Exon length (bp)	535.81
OG0002274	42	IA	O	Exon length (bp)	679.239
OG0002276	42	IA	O	Exon length (bp)	417.959
OG0002277	41	IA	O	Exon length (bp)	1336.6
OG0002279	42	IA	O	Exon length (bp)	878.212
OG0002280	42	IA	O	Exon length (bp)	1061.08
OG0002281	42	IA	O	Exon length (bp)	1701.37
OG0002282	42	IA	O	Exon length (bp)	2412.5
OG0002283	42	IA	O	Exon length (bp)	1649.89
OG0002284	42	IA	O	Exon length (bp)	1711.59
OG0002285	42	IA	O	Exon length (bp)	737.964
OG0002286	41	IA	O	Exon length (bp)	661.223
OG0002287	42	IA	O	Exon length (bp)	507.471
OG0002288	42	IA	O	Exon length (bp)	1496.11
OG0002289	42	IA	O	Exon length (bp)	210.104
OG0002291	42	IA	O	Exon length (bp)	2063.78
OG0002292	42	IA	O	Exon length (bp)	2072.07
OG0002293	41	IA	O	Exon length (bp)	1954.66
OG0002294	42	IA	O	Exon length (bp)	1643.26
OG0002298	42	IA	O	Exon length (bp)	3640.79
OG0002299	42	IA	O	Exon length (bp)	1591.77
OG0002300	40	IA	O	Exon length (bp)	629.28
OG0002301	42	IA	O	Exon length (bp)	391.805
OG0002302	42	IA	O	Exon length (bp)	1008.31
OG0002303	42	IA	O	Exon length (bp)	2006.64
OG0002304	42	IA	O	Exon length (bp)	2231.95
OG0002305	42	IA	O	Exon length (bp)	613.656
OG0002306	42	IA	O	Exon length (bp)	399.488
OG0002307	42	IA	O	Exon length (bp)	716.021
OG0002308	42	IA	O	Exon length (bp)	5671.92
OG0002309	42	IA	O	Exon length (bp)	180.213
OG0002310	41	IA	O	Exon length (bp)	2594.39
OG0002311	42	IA	O	Exon length (bp)	2404.9
OG0002312	42	IA	O	Exon length (bp)	2181.33
OG0002313	42	IA	O	Exon length (bp)	1756.44
OG0002314	42	IA	O	Exon length (bp)	1462.36
OG0002315	42	IA	O	Exon length (bp)	753.936
OG0002317	42	IA	O	Exon length (bp)	417.927
OG0002318	41	IA	O	Exon length (bp)	955.679
OG0002319	42	IA	O	Exon length (bp)	1384.02
OG0002320	42	IA	O	Exon length (bp)	1932.62
OG0002321	42	IA	O	Exon length (bp)	1013.08
OG0002322	42	IA	O	Exon length (bp)	292.53
OG0002323	42	IA	O	Exon length (bp)	517.163
OG0002324	42	IA	O	Exon length (bp)	1083.33
OG0002325	42	IA	O	Exon length (bp)	1334.97
OG0002326	42	IA	O	Exon length (bp)	1132.73
OG0002327	42	IA	O	Exon length (bp)	2292.53
OG0002328	42	IA	O	Exon length (bp)	1082.63
OG0002329	42	IA	O	Exon length (bp)	1051.51
OG0002330	42	IA	O	Exon length (bp)	572.95
OG0002331	42	IA	O	Exon length (bp)	2949.02
OG0002332	42	IA	O	Exon length (bp)	4288.26
OG0002333	42	IA	O	Exon length (bp)	870.833
OG0002334	41	IA	O	Exon length (bp)	621.339
OG0002335	39	IA	O	Exon length (bp)	1255.09
OG0002336	42	IA	O	Exon length (bp)	3476.08
OG0002338	42	IA	O	Exon length (bp)	979.228
OG0002339	42	IA	O	Exon length (bp)	2320.22
OG0002340	42	IA	O	Exon length (bp)	1513.55
OG0002341	42	IA	O	Exon length (bp)	1504.78
OG0002342	42	IA	O	Exon length (bp)	1147.33
OG0002343	42	IA	O	Exon length (bp)	3074.55
OG0002344	42	IA	O	Exon length (bp)	1299.59
OG0002345	42	IA	O	Exon length (bp)	3847.06
OG0002346	42	IA	O	Exon length (bp)	2588.98
OG0002347	42	IA	O	Exon length (bp)	1087.15
OG0002348	42	IA	O	Exon length (bp)	2928.28
OG0002349	39	IA	O	Exon length (bp)	365.773
OG0002350	37	IA	O	Exon length (bp)	575.854
OG0002351	42	IA	O	Exon length (bp)	924.203
OG0002352	42	IA	O	Exon length (bp)	484.057
OG0002354	41	IA	O	Exon length (bp)	2247.79
OG0002355	42	IA	O	Exon length (bp)	790.167
OG0002356	38	IA	O	Exon length (bp)	1610.35
OG0002357	42	IA	O	Exon length (bp)	860.912
OG0002358	42	IA	O	Exon length (bp)	411.854
OG0002359	32	IA	O	Exon length (bp)	275.124
OG0002360	42	IA	O	Exon length (bp)	1811.04
OG0002361	42	IA	O	Exon length (bp)	1788.43
OG0002362	42	IA	O	Exon length (bp)	621.717
OG0002363	42	IA	O	Exon length (bp)	1238.98
OG0002364	41	IA	O	Exon length (bp)	450.317
OG0002365	42	IA	O	Exon length (bp)	3355.98
OG0002366	42	IA	O	Exon length (bp)	3891.58
OG0002367	42	IA	O	Exon length (bp)	1928.68
OG0002368	41	IA	O	Exon length (bp)	1465.94
OG0002369	42	IA	O	Exon length (bp)	895.037
OG0002370	20	IA	O	Exon length (bp)	646.621
OG0002371	42	IA	O	Exon length (bp)	338.202
OG0002372	42	IA	O	Exon length (bp)	621.841
OG0002373	42	IA	O	Exon length (bp)	190.044
OG0002374	42	IA	O	Exon length (bp)	1219.26
OG0002375	42	IA	O	Exon length (bp)	958.22
OG0002376	41	IA	O	Exon length (bp)	1456.32
OG0002377	37	IA	O	Exon length (bp)	407.674
OG0002378	42	IA	O	Exon length (bp)	2035.33
OG0002379	41	IA	O	Exon length (bp)	1652.38
OG0002381	41	IA	O	Exon length (bp)	1455.26
OG0002382	42	IA	O	Exon length (bp)	1203.82
OG0002383	42	IA	O	Exon length (bp)	1077.48
OG0002384	42	IA	O	Exon length (bp)	1401.91
OG0002385	42	IA	O	Exon length (bp)	3361.5
OG0002386	41	IA	O	Exon length (bp)	1665.15
OG0002387	42	IA	O	Exon length (bp)	3114.1
OG0002388	42	IA	O	Exon length (bp)	3318.34
OG0002389	40	IA	O	Exon length (bp)	1224.33
OG0002390	42	IA	O	Exon length (bp)	3376.44
OG0002391	41	IA	O	Exon length (bp)	774.585
OG0002392	42	IA	O	Exon length (bp)	887.561
OG0002394	42	IA	O	Exon length (bp)	453.239
OG0002395	42	IA	O	Exon length (bp)	991.922
OG0002396	42	IA	O	Exon length (bp)	546.769
OG0002397	38	IA	O	Exon length (bp)	1114.71
OG0002398	42	IA	O	Exon length (bp)	3649.25
OG0002399	41	IA	O	Exon length (bp)	977.488
OG0002400	42	IA	O	Exon length (bp)	996.499
OG0002401	42	IA	O	Exon length (bp)	1411.73
OG0002402	42	IA	O	Exon length (bp)	1526.76
OG0002404	42	IA	O	Exon length (bp)	576
OG0002405	42	IA	O	Exon length (bp)	4690.44
OG0002406	41	IA	O	Exon length (bp)	8909.73
OG0002407	41	IA	O	Exon length (bp)	374.5
OG0002408	42	IA	O	Exon length (bp)	988.14
OG0002409	42	IA	O	Exon length (bp)	3664.43
OG0002410	42	IA	O	Exon length (bp)	626.05
OG0002411	40	IA	O	Exon length (bp)	524.47
OG0002412	42	IA	O	Exon length (bp)	562.72
OG0002413	41	IA	O	Exon length (bp)	537.234
OG0002414	41	IA	O	Exon length (bp)	1896.56
OG0002415	42	IA	O	Exon length (bp)	5067.12
OG0002416	42	IA	O	Exon length (bp)	375.607
OG0002417	42	IA	O	Exon length (bp)	932.122
OG0002418	41	IA	O	Exon length (bp)	214.2
OG0002419	37	IA	O	Exon length (bp)	814.912
OG0002420	38	IA	O	Exon length (bp)	4694.42
OG0002421	42	IA	O	Exon length (bp)	951.724
OG0002422	42	IA	O	Exon length (bp)	947.221
OG0002423	40	IA	O	Exon length (bp)	730.923
OG0002424	41	IA	O	Exon length (bp)	1300.97
OG0002426	42	IA	O	Exon length (bp)	459.128
OG0002427	42	IA	O	Exon length (bp)	358.651
OG0002428	42	IA	O	Exon length (bp)	1876.63
OG0002429	42	IA	O	Exon length (bp)	3545.23
OG0002430	28	IA	O	Exon length (bp)	329.805
OG0002431	39	IA	O	Exon length (bp)	432.295
OG0002432	42	IA	O	Exon length (bp)	786.073
OG0002433	41	IA	O	Exon length (bp)	605.291
OG0002434	42	IA	O	Exon length (bp)	996.305
OG0002435	42	IA	O	Exon length (bp)	944.533
OG0002436	38	IA	O	Exon length (bp)	658.635
OG0002437	42	IA	O	Exon length (bp)	557.915
OG0002438	42	IA	O	Exon length (bp)	1676.81
OG0002439	38	IA	O	Exon length (bp)	1824.08
OG0002441	42	IA	O	Exon length (bp)	469
OG0002442	37	IA	O	Exon length (bp)	533.062
OG0002443	42	IA	O	Exon length (bp)	761.351
OG0002444	42	IA	O	Exon length (bp)	2273.59
OG0002445	42	IA	O	Exon length (bp)	2725.43
OG0002446	42	IA	O	Exon length (bp)	1867.77
OG0002447	42	IA	O	Exon length (bp)	4044.53
OG0002448	42	IA	O	Exon length (bp)	784.075
OG0002449	42	IA	O	Exon length (bp)	1285.94
OG0002450	41	IA	O	Exon length (bp)	141.443
OG0002451	42	IA	O	Exon length (bp)	1879.3
OG0002452	42	IA	O	Exon length (bp)	705.553
OG0002453	40	IA	O	Exon length (bp)	991.273
OG0002454	41	IA	O	Exon length (bp)	1253.08
OG0002455	42	IA	O	Exon length (bp)	819.39
OG0002456	41	IA	O	Exon length (bp)	3781.57
OG0002457	42	IA	O	Exon length (bp)	1211.26
OG0002458	42	IA	O	Exon length (bp)	844.736
OG0002459	42	IA	O	Exon length (bp)	848.723
OG0002460	42	IA	O	Exon length (bp)	328.044
OG0002461	42	IA	O	Exon length (bp)	4862.25
OG0002462	42	IA	O	Exon length (bp)	1418.63
OG0002463	42	IA	O	Exon length (bp)	1994.82
OG0002464	41	IA	O	Exon length (bp)	1158.53
OG0002465	42	IA	O	Exon length (bp)	3041.53
OG0002466	42	IA	O	Exon length (bp)	5657.84
OG0002467	42	IA	O	Exon length (bp)	1824.12
OG0002468	42	IA	O	Exon length (bp)	237.244
OG0002469	42	IA	O	Exon length (bp)	1787.22
[truncated: 47,433 more rows]
