# Supplementary material for: Lifestyles shape genome size and gene content in fungal pathogens
Source: eLife. 2025 Dec 16;14:RP104975. doi: 10.7554/eLife.104975 (PMC12707824; doi:10.7554/eLife.104975)
Supplement: Figure 4—source data 1. [file elife-104975-fig4-data1.xlsx]

## Sheet: Figure4_SourceData1
trait	subset	Estimate	lowerbootCI	upperbootCI	OR	OR_low	OR_high	factor_type	sign
Exon length [100 bp]	H	4.16753	3.91958	4.4738	64.556	50.3795	87.689	Pathogen	sign
Genome [10 Mbp]	H	-0.151903	-0.336325	-0.0151552	0.859071	0.714391	0.984959	Pathogen	sign
Effectors [100]	H	-0.130658	-0.738672	0.411171	0.877518	0.477748	1.50858	Pathogen	other
Effectors [100]	M	-0.84426	-3.7925	1.36257	0.429876	0.0225392	3.90622	Pathogen	other
Effectors [100]	O/Ma/D/S	-3.51599	-9.13016	0.414145	0.0297185	0.000108348	1.51308	Pathogen	other
Genes [1000]	H	-0.0600036	-0.496926	0.150296	0.941761	0.608398	1.16218	Pathogen	other
Genes [1000]	M	-1.21375	-1.78582	-0.252776	0.297081	0.167659	0.776642	Pathogen	sign
Genes [1000]	O/Ma/D/S	-1.7019	-2.1719	-1.2914	0.182336	0.113961	0.274884	Pathogen	sign
tRNA [100]	H	-2.93463	-5.62126	-0.324519	0.0531502	0.00362009	0.722875	Pathogen	sign
tRNA [100]	M	-0.102712	-2.39937	2.2831	0.902387	0.090775	9.80705	Pathogen	other
tRNA [100]	O/Ma/D/S	1.30278	-0.773941	3.3282	3.67952	0.461192	27.8882	Pathogen	other
Exon length [100 bp]	H	2.47864	2.34129	2.63225	11.9251	10.3946	13.905	non-Pathogen	sign
Genome [10 Mbp]	H	-0.151903	-0.336325	-0.0151552	0.859071	0.714391	0.984959	non-Pathogen	sign
Effectors [100]	H	-0.492305	-0.866162	-0.254409	0.611216	0.420563	0.775375	non-Pathogen	sign
Genes [1000]	H	-0.121008	-0.394939	0.00052967	0.886027	0.673721	1.00053	non-Pathogen	other
tRNA [100]	H	-1.76032	-2.54904	-0.00536709	0.171989	0.078157	0.994647	non-Pathogen	sign
Effectors [100]	O/Ma/D/S	-2.14112	-5.19923	-1.28861	0.117523	0.00552084	0.275653	non-Pathogen	sign
Genes [1000]	O/Ma/D/S	-0.478712	-0.807646	-0.201396	0.619581	0.445906	0.817589	non-Pathogen	sign
tRNA [100]	O/Ma/D/S	0.0243907	-0.773941	0.553353	1.02469	0.461192	1.73907	non-Pathogen	other
Effectors [100]	M	-20.5643	-22.2141	-19.1813	1.17234e-09	2.25194e-10	4.67376e-09	non-Pathogen	sign
Genes [1000]	M	0.0227413	-0.336439	0.433927	1.023	0.714309	1.54331	non-Pathogen	other
tRNA [100]	M	-1.56476	-1.98976	0.000163717	0.209139	0.136728	1.00016	non-Pathogen	other
