# Supplementary material for: Lifestyles shape genome size and gene content in fungal pathogens
Source: eLife. 2025 Dec 16;14:RP104975. doi: 10.7554/eLife.104975 (PMC12707824; doi:10.7554/eLife.104975)
Supplement: Figure 4—source data 2. [file elife-104975-fig4-data2.xlsx]

## Sheet: Figure4_SourceData2
code	Group	type	rate
CCITR	Non-Patho Non-IA	Gene loss/My	0.972049
CPASP	Non-Patho Non-IA	Gene loss/My	0.810041
CaffHUMI	Non-Patho Non-IA	Gene loss/My	0
CcfPURP	Non-Patho Non-IA	Gene loss/My	0
CARUN	Non-Patho Non-IA	Gene loss/My	0.988572
CHUMI	Non-Patho Non-IA	Gene loss/My	0.988572
CSPAR	Non-Patho IA	Gene loss/My	0.741828
CCYPE	Non-Patho Non-IA	Gene loss/My	1.23092
CCAPE	Non-Patho Non-IA	Gene loss/My	4.09674
CPAZO	Non-Patho Non-IA	Gene loss/My	0.68279
CMONT	Non-Patho Non-IA	Gene loss/My	2.46136
CaffPURP	Non-Patho Non-IA	Gene loss/My	1.56062
CPURP	Non-Patho Non-IA	Gene loss/My	0
CDIGI	Non-Patho Non-IA	Gene loss/My	1.4425
CMAXI	Non-Patho Non-IA	Gene loss/My	1.731
CPUSI	Non-Patho Non-IA	Gene loss/My	1.66636
CFUSI	Non-Patho Non-IA	Gene loss/My	3.74931
CLOVE	Non-Patho Non-IA	Gene loss/My	1.74458
CAFRI	Patho Non-IA	Gene loss/My	0.207263
CSORG	Patho Non-IA	Gene loss/My	0.932683
ATAKE	Patho Non-IA	Gene loss/My	0.419885
ETYPH	Non-Patho IA	Gene loss/My	0.430385
ESYLV	Non-Patho IA	Gene loss/My	0.430385
EAOTE	Non-Patho IA	Gene loss/My	1.18965
EBRAC	Non-Patho IA	Gene loss/My	0.402429
EELYM	Non-Patho IA	Gene loss/My	0.387107
EBROM	Non-Patho IA	Gene loss/My	0.193553
EAMAR	Non-Patho IA	Gene loss/My	0.417389
EBACO	Non-Patho IA	Gene loss/My	0.104347
EFEST	Non-Patho IA	Gene loss/My	0
EGLYC	Non-Patho IA	Gene loss/My	0.104691
EGANS	Non-Patho IA	Gene loss/My	0.0399614
EINEB	Non-Patho IA	Gene loss/My	0.159845
BOBTE	Non-Patho Non-IA	Gene loss/My	0.740947
ATEXE	Non-Patho Non-IA	Gene loss/My	0.740947
AHYPO	Non-Patho Non-IA	Gene loss/My	0.393826
PIPOM	Non-Patho Non-IA	Gene loss/My	0.204607
MLIBE	Patho IA	Gene loss/My	0.564683
HSIAM	Patho IA	Gene loss/My	0.188228
UVIRE	Patho Non-IA	Gene loss/My	0.477518
MANIS	Patho IA	Gene loss/My	0.51554
MBRUN	Patho IA	Gene loss/My	0.206216
MROBE	Patho IA	Gene loss/My	0.114226
MGUIZ	Patho IA	Gene loss/My	0.0396067
MACRI	Patho IA	Gene loss/My	0.130424
MALBU	Patho IA	Gene loss/My	0.289115
MRILE	Patho IA	Gene loss/My	0.188506
PCHLA	Patho IA	Gene loss/My	0.133318
OCAMPR	Patho IA	Gene loss/My	1.41512
OCAMPF	Patho IA	Gene loss/My	0.707561
OUNIL	Patho IA	Gene loss/My	0.759714
OPOLY	Patho IA	Gene loss/My	0.296793
OSINE	Patho IA	Gene loss/My	1.56241
HRHOS	Patho IA	Gene loss/My	1.04161
HTHOM	Patho IA	Gene loss/My	1.77271
HMINN	Patho IA	Gene loss/My	0.886355
OAUST	Patho IA	Gene loss/My	0.339344
TOPHI	Patho Non-IA	Gene loss/My	0.601361
TCAPI	Patho Non-IA	Gene loss/My	0.977211
TPARAD	Patho IA	Gene loss/My	0.664669
TINFL	Patho IA	Gene loss/My	0.207377
AYAMA	Non-Patho Non-IA	Gene loss/My	0.390793
PLILA	Patho IA	Gene loss/My	0.297022
DCONI	Patho IA	Gene loss/My	0.69305
CARBU	Non-Patho Non-IA	Gene loss/My	0.147862
CPROT	Patho Non-IA	Gene loss/My	0.398077
HROSE	Patho Non-IA	Gene loss/My	0.318462
EWEBE	Patho IA	Gene loss/My	0.999563
TATROB	Patho Non-IA	Gene loss/My	7.1322
TAFRO	Patho Non-IA	Gene loss/My	0
TGUIZ	Non-Patho Non-IA	Gene loss/My	1.59181
TLENT	Non-Patho Non-IA	Gene loss/My	0.892494
TBREVR	Patho Non-IA	Gene loss/My	1.78499
THARZ	Patho Non-IA	Gene loss/My	0
TLIXI	Patho Non-IA	Gene loss/My	0.610912
TPLEU	Patho Non-IA	Gene loss/My	0.562984
TVIRE	Patho Non-IA	Gene loss/My	0
TVIRI	Patho Non-IA	Gene loss/My	0.139042
TLONG	Patho Non-IA	Gene loss/My	0.88253
TKONII	Non-Patho Non-IA	Gene loss/My	0.441265
TREES	Non-Patho Non-IA	Gene loss/My	0.160006
TPARAR	Patho Non-IA	Gene loss/My	0.80003
TCITR	Patho Non-IA	Gene loss/My	0.669274
TASPE	Patho Non-IA	Gene loss/My	1.43411
THAMA	Patho Non-IA	Gene loss/My	0.409747
TGAMS	Patho Non-IA	Gene loss/My	0.205072
TKONIO	Patho Non-IA	Gene loss/My	0.615217
TATROV	Patho Non-IA	Gene loss/My	0.19138
TERIN	Non-Patho Non-IA	Gene loss/My	0.695204
TBREVO	Non-Patho Non-IA	Gene loss/My	0.197741
TARUN	Non-Patho Non-IA	Gene loss/My	0.395482
TOLIG	Non-Patho Non-IA	Gene loss/My	0.489927
HPERN	Patho Non-IA	Gene loss/My	0.395835
PPENI	Patho Non-IA	Gene loss/My	0.203452
SHEPI	Patho IA	Gene loss/My	0.28458
ALECA	Patho IA	Gene loss/My	0.18972
CCICA	Patho IA	Gene loss/My	2.89892
CTENU	Patho IA	Gene loss/My	1.44946
CFUMO	Patho IA	Gene loss/My	0.678254
CPRUI	Patho IA	Gene loss/My	0.849892
CMILI	Patho IA	Gene loss/My	0.515861
CFARI	Patho IA	Gene loss/My	0.0820298
CJAVA	Patho IA	Gene loss/My	0
BBASS	Patho IA	Gene loss/My	0.106342
BRUDR	Patho IA	Gene loss/My	0
BBRON	Patho IA	Gene loss/My	0.261606
BPSEU	Patho IA	Gene loss/My	0.297876
LPSAL	Patho IA	Gene loss/My	0.183066
LFUNG	Patho IA	Gene loss/My	0.28309
SAOGA	Non-Patho Non-IA	Gene loss/My	0.244532
THEMI	Patho IA	Gene loss/My	0.150481
SCHAR	Non-Patho Non-IA	Gene loss/My	0.102107
SCHLO	Non-Patho Non-IA	Gene loss/My	0.204214
MECHI	Non-Patho Non-IA	Gene loss/My	0.0459593
PRORI	Patho Non-IA	Gene loss/My	0.0992612
CROSE	Patho Non-IA	Gene loss/My	0.384326
GTUMU	Non-Patho Non-IA	Gene loss/My	0.219615
GFLAV	Non-Patho IA	Gene loss/My	0.185074
GMORB	Patho IA	Gene loss/My	0.185074
GPUTT	Non-Patho IA	Gene loss/My	0.209101
BFELI	Patho IA	Gene loss/My	0.895792
ACHRY	Non-Patho Non-IA	Gene loss/My	0.651485
TOVAL	Patho IA	Gene loss/My	0
TSYMP	Non-Patho Non-IA	Gene loss/My	0.102039
TROSE	Patho IA	Gene loss/My	0.143965
SORYZ	Patho Non-IA	Gene loss/My	0.172314
SBRAC	Non-Patho Non-IA	Gene loss/My	0.114876
SSTRI	Non-Patho Non-IA	Gene loss/My	0.0729446
FIRRE	Patho Non-IA	Gene loss/My	7.06336
FLUFF	Non-Patho Non-IA	Gene loss/My	11.7723
FCAAT	Patho IA	Gene loss/My	1.29535
FINCA	Patho Non-IA	Gene loss/My	3.52021
FHAIN	Patho Non-IA	Gene loss/My	3.98099
FNANU	Patho Non-IA	Gene loss/My	3.98099
FCOFF	Non-Patho Non-IA	Gene loss/My	1.99942
FCITR	Non-Patho Non-IA	Gene loss/My	0.277662
FHUMU	Non-Patho Non-IA	Gene loss/My	5.10399
FSCIR	Patho Non-IA	Gene loss/My	17.0133
FFLAG	Non-Patho Non-IA	Gene loss/My	1.03898
FEQUI	Patho Non-IA	Gene loss/My	2.90624
FCLAV	Non-Patho Non-IA	Gene loss/My	1.07148
FCAMP	Non-Patho Non-IA	Gene loss/My	0.552096
FcfAYWE	Non-Patho Non-IA	Gene loss/My	0.852108
FNELS	Patho Non-IA	Gene loss/My	1.70422
FCHLA	Patho IA	Gene loss/My	1.35322
FAYWE	Non-Patho Non-IA	Gene loss/My	0.755362
FTRAN	Non-Patho Non-IA	Gene loss/My	2.91765
FLONG	Patho Non-IA	Gene loss/My	2.18824
FARME	Patho Non-IA	Gene loss/My	13.1462
FPALU	Patho Non-IA	Gene loss/My	6.5731
FSIBI	Patho Non-IA	Gene loss/My	4.81736
FSPOR	Patho Non-IA	Gene loss/My	12.0434
FLANG	Non-Patho Non-IA	Gene loss/My	5.10778
FNODO	Non-Patho Non-IA	Gene loss/My	1.69463
FGOOL	Non-Patho Non-IA	Gene loss/My	5.93121
FAUSTM	Patho Non-IA	Gene loss/My	1.54652
FCORT	Patho Non-IA	Gene loss/My	1.54652
FBRASC	Patho Non-IA	Gene loss/My	0
FMERIxA	Patho Non-IA	Gene loss/My	0
FMERI	Patho IA	Gene loss/My	1.18919
FASIA	Patho Non-IA	Gene loss/My	0
FVORO	Patho Non-IA	Gene loss/My	23.7086
FUSSU	Patho Non-IA	Gene loss/My	8.95985
FNEPA	Patho Non-IA	Gene loss/My	7.46891
FACAC	Patho Non-IA	Gene loss/My	0
FAETH	Patho Non-IA	Gene loss/My	2.64198
FGRAME	Patho Non-IA	Gene loss/My	40.7556
FGERL	Patho Non-IA	Gene loss/My	0
FBOOT	Patho Non-IA	Gene loss/My	11.7047
FLOUI	Patho Non-IA	Gene loss/My	3.64524
FMESO	Patho Non-IA	Gene loss/My	0
FCULM	Patho Non-IA	Gene loss/My	0
FCERE	Patho Non-IA	Gene loss/My	2.97688
FPSEUG	Patho Non-IA	Gene loss/My	2.52782
FSUBT	Patho Non-IA	Gene loss/My	1.50398
FPRAE	Patho Non-IA	Gene loss/My	0
FSAMB	Non-Patho Non-IA	Gene loss/My	0.578443
FVENE	Non-Patho Non-IA	Gene loss/My	1.15689
FKYUS	Patho Non-IA	Gene loss/My	2.68236
FPOAE	Patho Non-IA	Gene loss/My	1.4401
FACUM	Patho Non-IA	Gene loss/My	3.60108
FTRIC	Patho Non-IA	Gene loss/My	1.80054
FAVEN	Patho Non-IA	Gene loss/My	1.23713
FTORU	Patho Non-IA	Gene loss/My	0.784432
FNURR	Non-Patho Non-IA	Gene loss/My	0.76265
FGRAMU	Patho Non-IA	Gene loss/My	1.33646
FHETE	Patho Non-IA	Gene loss/My	0.334116
FOXYS	Patho Non-IA	Gene loss/My	8.80328
FODOR	Patho Non-IA	Gene loss/My	3.52131
FFOET	Patho Non-IA	Gene loss/My	7.33946
FCOMM	Patho Non-IA	Gene loss/My	1.36582
FNISI	Non-Patho Non-IA	Gene loss/My	1.51393
FMISC	Patho Non-IA	Gene loss/My	1.51393
FGADI	Non-Patho Non-IA	Gene loss/My	5.78107
FNEWN	Non-Patho Non-IA	Gene loss/My	6.36643
FPINI	Non-Patho Non-IA	Gene loss/My	3.35729
FSORO	Patho Non-IA	Gene loss/My	10.0719
FANTH	Patho Non-IA	Gene loss/My	8.60191
FSUCC	Patho Non-IA	Gene loss/My	6.42299
FBULB	Patho Non-IA	Gene loss/My	6.42299
FCIRC	Patho IA	Gene loss/My	5.46033
FSUBG	Patho Non-IA	Gene loss/My	3.00065
FTEMP	Patho Non-IA	Gene loss/My	2.00043
FBACT	Patho Non-IA	Gene loss/My	8.7811
FGUTT	Patho Non-IA	Gene loss/My	7.47319
FFRAC	Non-Patho Non-IA	Gene loss/My	9.96425
FBEGO	Patho Non-IA	Gene loss/My	8.46122
FSTER	Patho Non-IA	Gene loss/My	5.60059
FTUPI	Patho Non-IA	Gene loss/My	4.62942
FMEXI	Patho Non-IA	Gene loss/My	1.91433
FAGAP	Patho Non-IA	Gene loss/My	1.94934
FVERT	Patho IA	Gene loss/My	0
FcfVERT	Patho IA	Gene loss/My	0
FMUSA	Patho Non-IA	Gene loss/My	18.4115
FCOIC	Non-Patho Non-IA	Gene loss/My	18.969
FTJAE	Patho Non-IA	Gene loss/My	41.0779
FRAMI	Patho Non-IA	Gene loss/My	61.6168
FNAPI	Patho Non-IA	Gene loss/My	25.6125
FBREV	Non-Patho Non-IA	Gene loss/My	22.6575
FPSEUA	Patho Non-IA	Gene loss/My	11.3287
FPSEUN	Patho Non-IA	Gene loss/My	33.8361
FTHAP	Patho Non-IA	Gene loss/My	14.6144
FPSEUC	Patho Non-IA	Gene loss/My	39.8724
FXYRO	Patho IA	Gene loss/My	74.0488
FDENT	Patho Non-IA	Gene loss/My	10.2417
FNYGA	Patho Non-IA	Gene loss/My	5.4166
FMUND	Non-Patho Non-IA	Gene loss/My	3.42841
FXYLA	Patho Non-IA	Gene loss/My	8.69812
FPHYL	Patho Non-IA	Gene loss/My	5.79875
FUDUM	Patho Non-IA	Gene loss/My	3.58104
FSECO	Patho Non-IA	Gene loss/My	2.21518
FACUT	Patho Non-IA	Gene loss/My	2.21518
FPROL	Patho Non-IA	Gene loss/My	3.07665
FGLOB	Patho Non-IA	Gene loss/My	12.3066
FFUJI	Patho Non-IA	Gene loss/My	7.43364
FMANG	Patho Non-IA	Gene loss/My	6.71036
FCONCE	Patho Non-IA	Gene loss/My	2.23679
FSACC	Patho Non-IA	Gene loss/My	2.48807
FDLAM	Non-Patho Non-IA	Gene loss/My	1.08294
FREDO	Patho Non-IA	Gene loss/My	0
FcfHOST	Patho Non-IA	Gene loss/My	2.05631
FHOST	Patho Non-IA	Gene loss/My	3.172
FALGE	Patho Non-IA	Gene loss/My	1.00788
FBURG	Non-Patho Non-IA	Gene loss/My	0.75591
FBEOM	Non-Patho Non-IA	Gene loss/My	0.939547
FAUSTF	Patho Non-IA	Gene loss/My	2.09861
FCONCO	Non-Patho Non-IA	Gene loss/My	2.51833
FANGU	Patho Non-IA	Gene loss/My	2.95912
FBABI	Non-Patho Non-IA	Gene loss/My	1.57753
FCONT	Patho Non-IA	Gene loss/My	8.18254
FZANT	Patho Non-IA	Gene loss/My	6.13691
FTORR	Patho Non-IA	Gene loss/My	2.56007
FSARC	Non-Patho Non-IA	Gene loss/My	0.409451
FLATE	Patho Non-IA	Gene loss/My	0.409451
FSTIL	Patho Non-IA	Gene loss/My	0.45691
FSUBL	Patho Non-IA	Gene loss/My	1.37146
FBUHA	Patho Non-IA	Gene loss/My	0.872745
FBUXI	Patho Non-IA	Gene loss/My	0.839378
FCYAN	Non-Patho Non-IA	Gene loss/My	0.305228
FSOLA	Patho Non-IA	Gene loss/My	9.34355
FVANE	Patho Non-IA	Gene loss/My	0
FMETA	Patho Non-IA	Gene loss/My	2.02662
FPHAS	Patho Non-IA	Gene loss/My	2.53328
FFALC	Patho Non-IA	Gene loss/My	1.8241
FcfFALC	Patho Non-IA	Gene loss/My	1.36807
FKURO	Patho IA	Gene loss/My	5.39185
FEUWA	Patho IA	Gene loss/My	0
FFLOR	Patho IA	Gene loss/My	2.32359
FAMBR	Non-Patho IA	Gene loss/My	0
FTUAR	Non-Patho IA	Gene loss/My	0.992793
FNEOC	Patho Non-IA	Gene loss/My	0.835812
FVIRG	Patho Non-IA	Gene loss/My	0.477527
FILLU	Non-Patho Non-IA	Gene loss/My	0.324755
FDECE	Patho IA	Gene loss/My	1.32817
FALBO	Non-Patho Non-IA	Gene loss/My	0.29515
FSETO	Non-Patho Non-IA	Gene loss/My	0.595994
FSTAP	Patho Non-IA	Gene loss/My	1.007
FZEAL	Patho Non-IA	Gene loss/My	0.587414
FRUSC	Patho Non-IA	Gene loss/My	0.399189
FALBI	Non-Patho Non-IA	Gene loss/My	0.201161
FNEMA	Non-Patho Non-IA	Gene loss/My	0.111756
FDIME	Patho Non-IA	Gene loss/My	0.172184
FPENZ	Non-Patho Non-IA	Gene loss/My	0.459158
FDOME	Non-Patho Non-IA	Gene loss/My	0.417548
FVENT	Patho Non-IA	Gene loss/My	0.096603
IMORS	Patho Non-IA	Gene loss/My	0.899826
IDEST	Patho Non-IA	Gene loss/My	0.67487
CHUBE	Patho Non-IA	Gene loss/My	0.758095
DMACR	Patho Non-IA	Gene loss/My	0.472562
DTORR	Patho Non-IA	Gene loss/My	0.472562
NCOCC	Patho IA	Gene loss/My	0.569894
NPUNI	Patho Non-IA	Gene loss/My	0.455915
NHEDE	Patho Non-IA	Gene loss/My	0.639034
NGALL	Patho IA	Gene loss/My	0.373623
NDITI	Patho IA	Gene loss/My	0.373623
CCYLI	Patho Non-IA	Gene loss/My	0.274653
CFUCK	Patho IA	Gene loss/My	0.683335
CACIC	Patho Non-IA	Gene loss/My	1.25726
CHONGH	Non-Patho Non-IA	Gene loss/My	0
CFUJI	Patho Non-IA	Gene loss/My	0.894932
CPSEUR	Patho Non-IA	Gene loss/My	0.465871
CCROU	Patho Non-IA	Gene loss/My	1.39761
CPAUC	Patho Non-IA	Gene loss/My	0.397184
CLEUCT	Patho Non-IA	Gene loss/My	0.293674
CHONGK	Patho Non-IA	Gene loss/My	0.163631
CPSEUT	Non-Patho Non-IA	Gene loss/My	0.163631
CILIC	Patho Non-IA	Gene loss/My	1.47808
CPSEUN	Patho Non-IA	Gene loss/My	0.167356
CHENR	Patho Non-IA	Gene loss/My	1.00413
CNAVI	Non-Patho Non-IA	Gene loss/My	1.18773
TRUBI	Patho Non-IA	Gene loss/My	0.573268
APENI	Non-Patho Non-IA	Gene loss/My	0.282072
CPACH	Patho Non-IA	Gene loss/My	0.228689
PBUXI	Patho Non-IA	Gene loss/My	0.123139
PFOLI	Patho Non-IA	Gene loss/My	0.266801
SNORV	Non-Patho Non-IA	Gene loss/My	0.0967651
XRECI	Non-Patho Non-IA	Gene loss/My	0.0615778
DAUST	Patho IA	Gene loss/My	0.112913
DNEOC	Patho Non-IA	Gene loss/My	0.451652
DEUCA	Non-Patho Non-IA	Gene loss/My	0.174679
DVIRE	Patho Non-IA	Gene loss/My	0
ELARI	Patho IA	Gene loss/My	0
EPOLO	Patho IA	Gene loss/My	0.0315359
CEUCA	Patho IA	Gene loss/My	0
CFIMB	Patho IA	Gene loss/My	0
CMANG	Patho IA	Gene loss/My	0.244226
CCACA	Patho IA	Gene loss/My	0.118991
CPLAT	Patho IA	Gene loss/My	0.111463
CALBI	Patho IA	Gene loss/My	0.11298
CHARR	Patho Non-IA	Gene loss/My	0.0363406
CSMAL	Patho IA	Gene loss/My	0.109022
CPOPU	Non-Patho Non-IA	Gene loss/My	0.100036
CTHIE	Non-Patho Non-IA	Gene loss/My	0.100036
BBASI	Patho Non-IA	Gene loss/My	0.0941218
TETHA	Patho IA	Gene loss/My	0.0387699
TMUSA	Patho Non-IA	Gene loss/My	0.0387699
TEURI	Non-Patho Non-IA	Gene loss/My	0.0327113
TPUNC	Patho Non-IA	Gene loss/My	0.0801799
CADIP	Non-Patho Non-IA	Gene loss/My	0.0821081
AXYLE	Patho IA	Gene loss/My	0.0273694
BFAGA	Patho IA	Gene loss/My	0.0366734
KCAPE	Non-Patho IA	Gene loss/My	0
KPROT	Non-Patho IA	Gene loss/My	0.0221039
SAPIO	Patho Non-IA	Gene loss/My	0.0354417
SBOYD	Patho Non-IA	Gene loss/My	0.0886042
SDEHO	Patho Non-IA	Gene loss/My	0
SAURA	Patho Non-IA	Gene loss/My	0.0613856
LPROL	Patho Non-IA	Gene loss/My	0.0249564
SBREV	Patho Non-IA	Gene loss/My	0.178056
BCHLA	Non-Patho Non-IA	Gene loss/My	0.0809346
CTOFI	Non-Patho Non-IA	Gene loss/My	0
CLIRI	Patho Non-IA	Gene loss/My	0.127349
CINCA	Patho Non-IA	Gene loss/My	0.194628
CFALC	Patho Non-IA	Gene loss/My	1.26621
CGRAM	Patho Non-IA	Gene loss/My	0.759724
CELEU	Patho Non-IA	Gene loss/My	0.863254
CSUBL	Patho Non-IA	Gene loss/My	0.265031
CECHI	Patho Non-IA	Gene loss/My	0.199528
CHIGG	Patho Non-IA	Gene loss/My	0.380754
CDEST	Patho Non-IA	Gene loss/My	0.152301
CSHIS	Patho Non-IA	Gene loss/My	0.264816
CLENT	Patho Non-IA	Gene loss/My	0.60638
CTANA	Patho Non-IA	Gene loss/My	0.485104
CCOCC	Patho Non-IA	Gene loss/My	0.173147
CACUT	Patho Non-IA	Gene loss/My	0.0475663
CSCOV	Patho Non-IA	Gene loss/My	0.0475663
CNYMP	Patho Non-IA	Gene loss/My	0.079153
CSIMM	Patho Non-IA	Gene loss/My	0.109336
CFIOR	Patho Non-IA	Gene loss/My	0.0359533
CSALI	Patho Non-IA	Gene loss/My	0.101698
CORCH	Patho Non-IA	Gene loss/My	0.19799
CCHLO	Patho Non-IA	Gene loss/My	0.185285
CAENI	Patho Non-IA	Gene loss/My	1.48607
CVINI	Patho Non-IA	Gene loss/My	1.98143
CFRUC	Patho Non-IA	Gene loss/My	0.840409
CTROP	Patho Non-IA	Gene loss/My	1.16937
CSIAM	Patho Non-IA	Gene loss/My	0.233874
CASIA	Patho Non-IA	Gene loss/My	0.109116
CGLOE	Patho Non-IA	Gene loss/My	0.0571847
CCAME	Patho Non-IA	Gene loss/My	0.277718
CTHEO	Patho Non-IA	Gene loss/My	0.204733
CKARS	Patho Non-IA	Gene loss/My	0.315627
CSANS	Patho Non-IA	Gene loss/My	0.631254
CTRUN	Patho Non-IA	Gene loss/My	0.244654
CMUSI	Patho Non-IA	Gene loss/My	0.481052
CPLUR	Patho Non-IA	Gene loss/My	0.641403
CSOJA	Patho Non-IA	Gene loss/My	0.183308
CSIDA	Patho Non-IA	Gene loss/My	0
CORBI	Patho Non-IA	Gene loss/My	0.120937
CSPIN	Patho Non-IA	Gene loss/My	0
CTRIF	Patho Non-IA	Gene loss/My	0.125663
CLIND	Patho Non-IA	Gene loss/My	0.104642
FFURC	Non-Patho Non-IA	Gene loss/My	0.23403
PCUCU	Patho Non-IA	Gene loss/My	0.085102
VKLEB	Patho Non-IA	Gene loss/My	0.0729572
VISAA	Patho Non-IA	Gene loss/My	0.0486381
VTRIC	Patho IA	Gene loss/My	0.0219819
VZARE	Patho Non-IA	Gene loss/My	0.0206254
VALBO	Patho IA	Gene loss/My	0.0701894
VDAHL	Patho IA	Gene loss/My	0.114663
VNONA	Patho IA	Gene loss/My	0.114663
VNUBI	Patho Non-IA	Gene loss/My	0.105757
SALKA	Non-Patho Non-IA	Gene loss/My	0.200794
RTULA	Non-Patho Non-IA	Gene loss/My	0.105123
CNITS	Non-Patho Non-IA	Gene loss/My	0.0554721
CMACR	Non-Patho Non-IA	Gene loss/My	0.0554721
CJAPO	Non-Patho Non-IA	Gene loss/My	0
CPARA	Patho Non-IA	Gene loss/My	0.216191
CRADI	Non-Patho Non-IA	Gene loss/My	0.260681
CCARP	Patho Non-IA	Gene loss/My	0.104272
CNATE	Non-Patho Non-IA	Gene loss/My	0.289391
CDISP	Patho Non-IA	Gene loss/My	0.101874
CDEUT	Patho Non-IA	Gene loss/My	0.0419455
CAUST	Patho Non-IA	Gene loss/My	0.083891
CCUBE	Patho Non-IA	Gene loss/My	0.0926577
CVITI	Patho Non-IA	Gene loss/My	0.150803
CLUST	Non-Patho Non-IA	Gene loss/My	0.164513
JJUGL	Patho Non-IA	Gene loss/My	0.217138
JOBLO	Patho Non-IA	Gene loss/My	0.434276
OCLAV	Patho Non-IA	Gene loss/My	0.0708375
DASPA	Patho Non-IA	Gene loss/My	0.208833
SMAYD	Patho Non-IA	Gene loss/My	0.292366
DCITRC	Non-Patho Non-IA	Gene loss/My	0.139774
DCITRI	Patho Non-IA	Gene loss/My	0.209661
DCAPS	Patho Non-IA	Gene loss/My	0.120549
DAMPE	Patho Non-IA	Gene loss/My	0.150436
DLONG	Patho Non-IA	Gene loss/My	0.150436
DDEST	Patho Non-IA	Gene loss/My	0.147629
DHELI	Patho Non-IA	Gene loss/My	0.192417
DCITRA	Patho Non-IA	Gene loss/My	0.096906
CPICE	Patho Non-IA	Gene loss/My	0.0702656
VMALIC	Non-Patho Non-IA	Gene loss/My	0
VSORD	Patho Non-IA	Gene loss/My	0.0657744
VMALI	Patho Non-IA	Gene loss/My	0.0714319
CLEUCS	Patho Non-IA	Gene loss/My	0.0891962
PMINI	Patho Non-IA	Gene loss/My	0.104501
ONOVO	Patho IA	Gene loss/My	0.200374
OULM785401	Patho IA	Gene loss/My	0.200374
OHIMA1	Patho IA	Gene loss/My	0.0980693
OQUER1	Non-Patho IA	Gene loss/My	0
OTRIA	Non-Patho IA	Gene loss/My	0.229361
OPERF	Non-Patho IA	Gene loss/My	0.167477
OPICE	Non-Patho IA	Gene loss/My	0.167477
OIPS1	Non-Patho IA	Gene loss/My	0.216579
OMONT	Non-Patho IA	Gene loss/My	0.577543
OPOPU	Non-Patho IA	Gene loss/My	0.190826
SBRAS	Patho Non-IA	Gene loss/My	0
SSCHE	Patho Non-IA	Gene loss/My	0.166594
SGLOB	Patho Non-IA	Gene loss/My	0.0683307
SPHAS	Non-Patho IA	Gene loss/My	0.280769
OSTEN	Non-Patho IA	Gene loss/My	0.204137
SVARI	Non-Patho IA	Gene loss/My	0.272183
SPALL	Patho Non-IA	Gene loss/My	0.228814
CMINU	Non-Patho IA	Gene loss/My	0.245359
CBREV	Non-Patho IA	Gene loss/My	0.163572
HLIGN	Non-Patho IA	Gene loss/My	0.0652339
SINSE	Patho IA	Gene loss/My	0.0260352
FPURP	Non-Patho IA	Gene loss/My	0.0260352
LWAGE	Patho IA	Gene loss/My	0.0809853
LWING	Patho IA	Gene loss/My	0.404927
GCLAV	Patho IA	Gene loss/My	0
LLONG	Non-Patho IA	Gene loss/My	0.0893683
LLUND	Non-Patho IA	Gene loss/My	0.0858318
LSERP	Patho IA	Gene loss/My	0.112944
LPROC	Patho IA	Gene loss/My	0.105692
GGALE	Non-Patho IA	Gene loss/My	0.0807944
RQUERI	Patho IA	Gene loss/My	0.0530692
RQUERU	Non-Patho IA	Gene loss/My	0.0796038
RSULP	Non-Patho IA	Gene loss/My	0.15212
EVERM	Patho Non-IA	Gene loss/My	0.110908
GPENI	Non-Patho IA	Gene loss/My	0.113964
RAGUA	Non-Patho IA	Gene loss/My	0.0356087
RLAUR	Patho IA	Gene loss/My	0.0118696
RALBI	Non-Patho IA	Gene loss/My	0.143727
RAMBR	Non-Patho IA	Gene loss/My	0.119773
RARXI	Non-Patho IA	Gene loss/My	0.150157
GFRAG	Non-Patho IA	Gene loss/My	0.0683809
PCURV	Non-Patho Non-IA	Gene loss/My	0.00695097
PLIGN	Non-Patho Non-IA	Gene loss/My	0.0639087
ODOLI	Non-Patho Non-IA	Gene loss/My	0.0798859
MINCR	Patho Non-IA	Gene loss/My	0.166078
MRHIZ	Patho Non-IA	Gene loss/My	0.166078
GTRIT	Patho Non-IA	Gene loss/My	0.181041
FORYZ	Non-Patho Non-IA	Gene loss/My	0.0371572
NAORYZ	Patho Non-IA	Gene loss/My	0.0937044
PORYZ	Patho Non-IA	Gene loss/My	0.158176
PGRIS	Patho Non-IA	Gene loss/My	0.0790879
PPENN	Patho Non-IA	Gene loss/My	0.129515
NCRAS	Non-Patho Non-IA	Gene loss/My	0.508622
NTETRE	Non-Patho Non-IA	Gene loss/My	0.169541
NDISC	Non-Patho Non-IA	Gene loss/My	0.232946
NAFRI	Non-Patho Non-IA	Gene loss/My	0.0314587
NCERE	Non-Patho Non-IA	Gene loss/My	0.022252
NTETRA	Non-Patho Non-IA	Gene loss/My	0.0663286
NSUBL	Non-Patho Non-IA	Gene loss/My	0.132657
SMACR	Non-Patho Non-IA	Gene loss/My	0.0204353
TTHER	Non-Patho Non-IA	Gene loss/My	0.865937
CGLOB	Patho Non-IA	Gene loss/My	0.721614
TGRIS	Non-Patho Non-IA	Gene loss/My	0.56513
TTERR	Non-Patho Non-IA	Gene loss/My	0.21873
ANIGRI	Non-Patho Non-IA	Gene loss/My	0.181688
TUNIS	Non-Patho Non-IA	Gene loss/My	0.0940749
CTHER	Non-Patho Non-IA	Gene loss/My	0.276428
PANSE	Non-Patho Non-IA	Gene loss/My	0.146949
PCOMA	Non-Patho Non-IA	Gene loss/My	0
PMAYD	Patho Non-IA	Gene loss/My	0.204633
CPRUN	Patho Non-IA	Gene loss/My	0.0346285
CLIGN	Patho Non-IA	Gene loss/My	0.0173142
CHOFF	Patho Non-IA	Gene loss/My	0.0650407
CPULV	Patho Non-IA	Gene loss/My	0.07334
AMALA	Non-Patho Non-IA	Gene loss/My	0.0555587
APHAE	Patho Non-IA	Gene loss/My	0.0555587
NIORYZ	Patho IA	Gene loss/My	0.153646
NSPHA	Patho Non-IA	Gene loss/My	0.0438989
PFICI	Non-Patho Non-IA	Gene loss/My	0.0439848
PTHEA	Non-Patho Non-IA	Gene loss/My	0
NCLAV	Patho Non-IA	Gene loss/My	0.0728583
PKENY	Patho Non-IA	Gene loss/My	0.0539727
PVEXA	Non-Patho Non-IA	Gene loss/My	0.0760339
XFLAB	Non-Patho Non-IA	Gene loss/My	0.287022
XLONG	Non-Patho Non-IA	Gene loss/My	0.344426
XPOLY	Non-Patho Non-IA	Gene loss/My	0.151733
XHYPO	Non-Patho Non-IA	Gene loss/My	0.341961
XMULT	Non-Patho Non-IA	Gene loss/My	0.113987
XGRAM	Non-Patho Non-IA	Gene loss/My	0.232756
KDEUS	Patho Non-IA	Gene loss/My	0.0860817
RNECA	Patho Non-IA	Gene loss/My	0.101404
DRIGI	Non-Patho Non-IA	Gene loss/My	0.0929068
ECINC	Non-Patho Non-IA	Gene loss/My	0.135626
ASTYG	Non-Patho Non-IA	Gene loss/My	0.434246
ATRUN	Patho Non-IA	Gene loss/My	0.186105
JMULT	Non-Patho Non-IA	Gene loss/My	0.227703
HPULI	Non-Patho Non-IA	Gene loss/My	0.0979491
DCONC	Non-Patho IA	Gene loss/My	0.180814
DCHIL	Non-Patho Non-IA	Gene loss/My	0.723257
DESCH	Non-Patho IA	Gene loss/My	0.401805
ELIQU	Non-Patho Non-IA	Gene loss/My	0.334838
PHUNT	Non-Patho Non-IA	Gene loss/My	0.136238
HLIEN	Non-Patho Non-IA	Gene loss/My	0.220094
HSUBM	Non-Patho Non-IA	Gene loss/My	0.0665876
HMONT	Non-Patho Non-IA	Gene loss/My	0.133175
HRICK	Non-Patho Non-IA	Gene loss/My	0.0280729
HFRAG	Non-Patho Non-IA	Gene loss/My	0.0842186
HRUBI	Non-Patho Non-IA	Gene loss/My	0.0624582
MCANN	Patho Non-IA	Gene loss/My	0.0410713
MIBER	Non-Patho Non-IA	Gene loss/My	0.0273808
DPULV	Patho Non-IA	Gene loss/My	0.109647
MBOLL	Patho Non-IA	Gene loss/My	0.029677
CCITR	Non-Patho Non-IA	Gene gain/My	2.10611
CPASP	Non-Patho Non-IA	Gene gain/My	0.324016
CaffHUMI	Non-Patho Non-IA	Gene gain/My	0
CcfPURP	Non-Patho Non-IA	Gene gain/My	0
CARUN	Non-Patho Non-IA	Gene gain/My	3.95429
CHUMI	Non-Patho Non-IA	Gene gain/My	2.96572
CSPAR	Non-Patho IA	Gene gain/My	1.48366
CCYPE	Non-Patho Non-IA	Gene gain/My	0.527537
CCAPE	Non-Patho Non-IA	Gene gain/My	1.36558
CPAZO	Non-Patho Non-IA	Gene gain/My	2.73116
CMONT	Non-Patho Non-IA	Gene gain/My	0.820455
CaffPURP	Non-Patho Non-IA	Gene gain/My	0.62425
CPURP	Non-Patho Non-IA	Gene gain/My	0
CDIGI	Non-Patho Non-IA	Gene gain/My	0.865502
CMAXI	Non-Patho Non-IA	Gene gain/My	1.154
CPUSI	Non-Patho Non-IA	Gene gain/My	8.3318
CFUSI	Non-Patho Non-IA	Gene gain/My	2.08295
CLOVE	Non-Patho Non-IA	Gene gain/My	4.36145
CAFRI	Patho Non-IA	Gene gain/My	0.932683
CSORG	Patho Non-IA	Gene gain/My	1.76174
ATAKE	Patho Non-IA	Gene gain/My	0.587839
ETYPH	Non-Patho IA	Gene gain/My	1.29115
ESYLV	Non-Patho IA	Gene gain/My	2.36712
EAOTE	Non-Patho IA	Gene gain/My	0.594824
EBRAC	Non-Patho IA	Gene gain/My	3.62186
EELYM	Non-Patho IA	Gene gain/My	0.483883
EBROM	Non-Patho IA	Gene gain/My	0.29033
EAMAR	Non-Patho IA	Gene gain/My	0.939124
EBACO	Non-Patho IA	Gene gain/My	0.834777
EFEST	Non-Patho IA	Gene gain/My	0.206678
EGLYC	Non-Patho IA	Gene gain/My	0.628146
EGANS	Non-Patho IA	Gene gain/My	0.559459
EINEB	Non-Patho IA	Gene gain/My	0.719304
BOBTE	Non-Patho Non-IA	Gene gain/My	1.66713
ATEXE	Non-Patho Non-IA	Gene gain/My	0.370474
AHYPO	Non-Patho Non-IA	Gene gain/My	0.131275
PIPOM	Non-Patho Non-IA	Gene gain/My	1.05226
MLIBE	Patho IA	Gene gain/My	0.313713
HSIAM	Patho IA	Gene gain/My	1.06662
UVIRE	Patho Non-IA	Gene gain/My	0.238759
MANIS	Patho IA	Gene gain/My	0.927973
MBRUN	Patho IA	Gene gain/My	0.103108
MROBE	Patho IA	Gene gain/My	0.285566
MGUIZ	Patho IA	Gene gain/My	0.47528
MACRI	Patho IA	Gene gain/My	0.326061
MALBU	Patho IA	Gene gain/My	0.177917
MRILE	Patho IA	Gene gain/My	0.125671
PCHLA	Patho IA	Gene gain/My	0.399953
OCAMPR	Patho IA	Gene gain/My	1.41512
OCAMPF	Patho IA	Gene gain/My	1.41512
OUNIL	Patho IA	Gene gain/My	0.675301
OPOLY	Patho IA	Gene gain/My	0.296793
OSINE	Patho IA	Gene gain/My	4.34003
HRHOS	Patho IA	Gene gain/My	2.25682
HTHOM	Patho IA	Gene gain/My	1.2409
HMINN	Patho IA	Gene gain/My	3.01361
OAUST	Patho IA	Gene gain/My	0.113115
TOPHI	Patho Non-IA	Gene gain/My	1.42823
TCAPI	Patho Non-IA	Gene gain/My	0.676531
TPARAD	Patho IA	Gene gain/My	1.03393
TINFL	Patho IA	Gene gain/My	1.14057
AYAMA	Non-Patho Non-IA	Gene gain/My	0.564479
PLILA	Patho IA	Gene gain/My	0.594043
DCONI	Patho IA	Gene gain/My	0.297022
CARBU	Non-Patho Non-IA	Gene gain/My	0.559764
CPROT	Patho Non-IA	Gene gain/My	0.636924
HROSE	Patho Non-IA	Gene gain/My	0.716539
EWEBE	Patho IA	Gene gain/My	0.333188
TATROB	Patho Non-IA	Gene gain/My	25.6759
TAFRO	Patho Non-IA	Gene gain/My	11.4115
TGUIZ	Non-Patho Non-IA	Gene gain/My	0.795903
TLENT	Non-Patho Non-IA	Gene gain/My	1.78499
TBREVR	Patho Non-IA	Gene gain/My	0
THARZ	Patho Non-IA	Gene gain/My	0.610912
TLIXI	Patho Non-IA	Gene gain/My	6.72003
TPLEU	Patho Non-IA	Gene gain/My	4.16608
TVIRE	Patho Non-IA	Gene gain/My	0.417125
TVIRI	Patho Non-IA	Gene gain/My	0.139042
TLONG	Patho Non-IA	Gene gain/My	2.20633
TKONII	Non-Patho Non-IA	Gene gain/My	0.441265
TREES	Non-Patho Non-IA	Gene gain/My	0.160006
TPARAR	Patho Non-IA	Gene gain/My	0.160006
TCITR	Patho Non-IA	Gene gain/My	1.58952
TASPE	Patho Non-IA	Gene gain/My	1.02437
THAMA	Patho Non-IA	Gene gain/My	1.43411
TGAMS	Patho Non-IA	Gene gain/My	0.820289
TKONIO	Patho Non-IA	Gene gain/My	0.205072
TATROV	Patho Non-IA	Gene gain/My	1.72242
TERIN	Non-Patho Non-IA	Gene gain/My	0.278082
TBREVO	Non-Patho Non-IA	Gene gain/My	0.659136
TARUN	Non-Patho Non-IA	Gene gain/My	0.988705
TOLIG	Non-Patho Non-IA	Gene gain/My	0.762109
HPERN	Patho Non-IA	Gene gain/My	0.35985
PPENI	Patho Non-IA	Gene gain/My	0.183107
SHEPI	Patho IA	Gene gain/My	0.33201
ALECA	Patho IA	Gene gain/My	0.66402
CCICA	Patho IA	Gene gain/My	1.15957
CTENU	Patho IA	Gene gain/My	1.44946
CFUMO	Patho IA	Gene gain/My	0.904338
CPRUI	Patho IA	Gene gain/My	2.12473
CMILI	Patho IA	Gene gain/My	0.368472
CFARI	Patho IA	Gene gain/My	0.574208
CJAVA	Patho IA	Gene gain/My	0.246089
BBASS	Patho IA	Gene gain/My	0.106342
BRUDR	Patho IA	Gene gain/My	0.638054
BBRON	Patho IA	Gene gain/My	0.523212
BPSEU	Patho IA	Gene gain/My	0.357451
LPSAL	Patho IA	Gene gain/My	0.235371
LFUNG	Patho IA	Gene gain/My	0.488974
SAOGA	Non-Patho Non-IA	Gene gain/My	0.319772
THEMI	Patho IA	Gene gain/My	0.150481
SCHAR	Non-Patho Non-IA	Gene gain/My	0.204214
SCHLO	Non-Patho Non-IA	Gene gain/My	0.408428
MECHI	Non-Patho Non-IA	Gene gain/My	0.413634
PRORI	Patho Non-IA	Gene gain/My	0.286755
CROSE	Patho Non-IA	Gene gain/My	2.36086
GTUMU	Non-Patho Non-IA	Gene gain/My	0.43923
GFLAV	Non-Patho IA	Gene gain/My	0.0740295
GMORB	Patho IA	Gene gain/My	0.296118
GPUTT	Non-Patho IA	Gene gain/My	0.0784128
BFELI	Patho IA	Gene gain/My	0.162871
ACHRY	Non-Patho Non-IA	Gene gain/My	0.895792
TOVAL	Patho IA	Gene gain/My	0.255098
TSYMP	Non-Patho Non-IA	Gene gain/My	0.153059
TROSE	Patho IA	Gene gain/My	0.143965
SORYZ	Patho Non-IA	Gene gain/My	0.373346
SBRAC	Non-Patho Non-IA	Gene gain/My	0.172314
SSTRI	Non-Patho Non-IA	Gene gain/My	0.093786
FIRRE	Patho Non-IA	Gene gain/My	7.06336
FLUFF	Non-Patho Non-IA	Gene gain/My	4.70891
FCAAT	Patho IA	Gene gain/My	15.5442
FINCA	Patho Non-IA	Gene gain/My	4.69361
FHAIN	Patho Non-IA	Gene gain/My	7.96197
FNANU	Patho Non-IA	Gene gain/My	3.98099
FCOFF	Non-Patho Non-IA	Gene gain/My	1.99942
FCITR	Non-Patho Non-IA	Gene gain/My	1.66597
FHUMU	Non-Patho Non-IA	Gene gain/My	10.208
FSCIR	Patho Non-IA	Gene gain/My	6.80533
FFLAG	Non-Patho Non-IA	Gene gain/My	8.31185
FEQUI	Patho Non-IA	Gene gain/My	3.39061
FCLAV	Non-Patho Non-IA	Gene gain/My	0.714323
FCAMP	Non-Patho Non-IA	Gene gain/My	1.38024
FcfAYWE	Non-Patho Non-IA	Gene gain/My	2.55632
FNELS	Patho Non-IA	Gene gain/My	5.11265
FCHLA	Patho IA	Gene gain/My	3.38304
FAYWE	Non-Patho Non-IA	Gene gain/My	2.76966
FTRAN	Non-Patho Non-IA	Gene gain/My	5.10589
FLONG	Patho Non-IA	Gene gain/My	3.64707
FARME	Patho Non-IA	Gene gain/My	8.21637
FPALU	Patho Non-IA	Gene gain/My	18.076
FSIBI	Patho Non-IA	Gene gain/My	26.4955
FSPOR	Patho Non-IA	Gene gain/My	7.22604
FLANG	Non-Patho Non-IA	Gene gain/My	5.95907
FNODO	Non-Patho Non-IA	Gene gain/My	2.54195
FGOOL	Non-Patho Non-IA	Gene gain/My	6.77853
FAUSTM	Patho Non-IA	Gene gain/My	1.54652
FCORT	Patho Non-IA	Gene gain/My	1.54652
FBRASC	Patho Non-IA	Gene gain/My	1.47536
FMERIxA	Patho Non-IA	Gene gain/My	7.13516
FMERI	Patho IA	Gene gain/My	0
FASIA	Patho Non-IA	Gene gain/My	0
FVORO	Patho Non-IA	Gene gain/My	5.92716
FUSSU	Patho Non-IA	Gene gain/My	4.47993
FNEPA	Patho Non-IA	Gene gain/My	4.97927
FACAC	Patho Non-IA	Gene gain/My	7.19526
FAETH	Patho Non-IA	Gene gain/My	3.96298
FGRAME	Patho Non-IA	Gene gain/My	10.1889
FGERL	Patho Non-IA	Gene gain/My	30.5667
FBOOT	Patho Non-IA	Gene gain/My	19.5078
FLOUI	Patho Non-IA	Gene gain/My	1.82262
FMESO	Patho Non-IA	Gene gain/My	2.40207
FCULM	Patho Non-IA	Gene gain/My	1.48844
FCERE	Patho Non-IA	Gene gain/My	169.682
FPSEUG	Patho Non-IA	Gene gain/My	1.89587
FSUBT	Patho Non-IA	Gene gain/My	6.01592
FPRAE	Patho Non-IA	Gene gain/My	3.00796
FSAMB	Non-Patho Non-IA	Gene gain/My	3.47066
FVENE	Non-Patho Non-IA	Gene gain/My	2.89222
FKYUS	Patho Non-IA	Gene gain/My	3.21883
FPOAE	Patho Non-IA	Gene gain/My	2.88021
FACUM	Patho Non-IA	Gene gain/My	15.0045
FTRIC	Patho Non-IA	Gene gain/My	3.60108
FAVEN	Patho Non-IA	Gene gain/My	3.40209
FTORU	Patho Non-IA	Gene gain/My	2.09182
FNURR	Non-Patho Non-IA	Gene gain/My	1.5253
FGRAMU	Patho Non-IA	Gene gain/My	2.0047
FHETE	Patho Non-IA	Gene gain/My	3.00704
FOXYS	Patho Non-IA	Gene gain/My	28.1705
FODOR	Patho Non-IA	Gene gain/My	5.28197
FFOET	Patho Non-IA	Gene gain/My	30.2753
FCOMM	Patho Non-IA	Gene gain/My	4.78037
FNISI	Non-Patho Non-IA	Gene gain/My	13.6254
FMISC	Patho Non-IA	Gene gain/My	7.56967
FGADI	Non-Patho Non-IA	Gene gain/My	10.1169
FNEWN	Non-Patho Non-IA	Gene gain/My	37.4912
FPINI	Non-Patho Non-IA	Gene gain/My	6.71459
FSORO	Patho Non-IA	Gene gain/My	3.35729
FANTH	Patho Non-IA	Gene gain/My	17.2038
FSUCC	Patho Non-IA	Gene gain/My	6.42299
FBULB	Patho Non-IA	Gene gain/My	11.2402
FCIRC	Patho IA	Gene gain/My	17.7461
FSUBG	Patho Non-IA	Gene gain/My	2.00043
FTEMP	Patho Non-IA	Gene gain/My	1.00022
FBACT	Patho Non-IA	Gene gain/My	7.80543
FGUTT	Patho Non-IA	Gene gain/My	9.96425
FFRAC	Non-Patho Non-IA	Gene gain/My	12.4553
FBEGO	Patho Non-IA	Gene gain/My	10.5765
FSTER	Patho Non-IA	Gene gain/My	17.9219
FTUPI	Patho Non-IA	Gene gain/My	7.40707
FMEXI	Patho Non-IA	Gene gain/My	3.35008
FAGAP	Patho Non-IA	Gene gain/My	1.1696
FVERT	Patho IA	Gene gain/My	0
FcfVERT	Patho IA	Gene gain/My	61.5233
FMUSA	Patho Non-IA	Gene gain/My	64.4401
FCOIC	Non-Patho Non-IA	Gene gain/My	88.5219
FTJAE	Patho Non-IA	Gene gain/My	164.312
FRAMI	Patho Non-IA	Gene gain/My	184.85
FNAPI	Patho Non-IA	Gene gain/My	166.481
FBREV	Non-Patho Non-IA	Gene gain/My	101.959
FPSEUA	Patho Non-IA	Gene gain/My	147.274
FPSEUN	Patho Non-IA	Gene gain/My	87.974
FTHAP	Patho Non-IA	Gene gain/My	8.76862
FPSEUC	Patho Non-IA	Gene gain/My	62.6566
FXYRO	Patho IA	Gene gain/My	34.1763
FDENT	Patho Non-IA	Gene gain/My	23.8974
FNYGA	Patho Non-IA	Gene gain/My	24.3747
FMUND	Non-Patho Non-IA	Gene gain/My	19.7134
FXYLA	Patho Non-IA	Gene gain/My	5.79875
FPHYL	Patho Non-IA	Gene gain/My	11.5975
FUDUM	Patho Non-IA	Gene gain/My	11.9368
FSECO	Patho Non-IA	Gene gain/My	22.8902
FACUT	Patho Non-IA	Gene gain/My	5.16876
FPROL	Patho Non-IA	Gene gain/My	6.1533
FGLOB	Patho Non-IA	Gene gain/My	33.8431
FFUJI	Patho Non-IA	Gene gain/My	4.46018
FMANG	Patho Non-IA	Gene gain/My	7.82875
FCONCE	Patho Non-IA	Gene gain/My	8.94714
FSACC	Patho Non-IA	Gene gain/My	1.99046
FDLAM	Non-Patho Non-IA	Gene gain/My	2.70736
FREDO	Patho Non-IA	Gene gain/My	1.23378
FcfHOST	Patho Non-IA	Gene gain/My	2.05631
FHOST	Patho Non-IA	Gene gain/My	5.1545
FALGE	Patho Non-IA	Gene gain/My	4.28349
FBURG	Non-Patho Non-IA	Gene gain/My	4.03152
FBEOM	Non-Patho Non-IA	Gene gain/My	2.58375
FAUSTF	Patho Non-IA	Gene gain/My	5.87611
FCONCO	Non-Patho Non-IA	Gene gain/My	8.39445
FANGU	Patho Non-IA	Gene gain/My	2.30154
FBABI	Non-Patho Non-IA	Gene gain/My	3.83114
FCONT	Patho Non-IA	Gene gain/My	6.81878
FZANT	Patho Non-IA	Gene gain/My	6.13691
FTORR	Patho Non-IA	Gene gain/My	1.16367
FSARC	Non-Patho Non-IA	Gene gain/My	2.72967
FLATE	Patho Non-IA	Gene gain/My	1.91077
FSTIL	Patho Non-IA	Gene gain/My	1.27935
FSUBL	Patho Non-IA	Gene gain/My	0.997423
FBUHA	Patho Non-IA	Gene gain/My	2.61823
FBUXI	Patho Non-IA	Gene gain/My	0.686764
FCYAN	Non-Patho Non-IA	Gene gain/My	2.28921
FSOLA	Patho Non-IA	Gene gain/My	18.6871
FVANE	Patho Non-IA	Gene gain/My	6.22903
FMETA	Patho Non-IA	Gene gain/My	6.58652
FPHAS	Patho Non-IA	Gene gain/My	4.5599
FFALC	Patho Non-IA	Gene gain/My	8.66446
FcfFALC	Patho Non-IA	Gene gain/My	7.75242
FKURO	Patho IA	Gene gain/My	3.59457
FEUWA	Patho IA	Gene gain/My	0.898642
FFLOR	Patho IA	Gene gain/My	1.1618
FAMBR	Non-Patho IA	Gene gain/My	2.15068
FTUAR	Non-Patho IA	Gene gain/My	3.54569
FNEOC	Patho Non-IA	Gene gain/My	3.22385
FVIRG	Patho Non-IA	Gene gain/My	1.91011
FILLU	Non-Patho Non-IA	Gene gain/My	0.835085
FDECE	Patho IA	Gene gain/My	3.5418
FALBO	Non-Patho Non-IA	Gene gain/My	2.21362
FSETO	Non-Patho Non-IA	Gene gain/My	2.38398
FSTAP	Patho Non-IA	Gene gain/My	0.923079
FZEAL	Patho Non-IA	Gene gain/My	1.09091
FRUSC	Patho Non-IA	Gene gain/My	0.35927
FALBI	Non-Patho Non-IA	Gene gain/My	1.00581
FNEMA	Non-Patho Non-IA	Gene gain/My	1.31872
FDIME	Patho Non-IA	Gene gain/My	0.573948
FPENZ	Non-Patho Non-IA	Gene gain/My	0.401764
FDOME	Non-Patho Non-IA	Gene gain/My	0.243569
FVENT	Patho Non-IA	Gene gain/My	0.193206
IMORS	Patho Non-IA	Gene gain/My	3.5993
IDEST	Patho Non-IA	Gene gain/My	2.24957
CHUBE	Patho Non-IA	Gene gain/My	1.70571
DMACR	Patho Non-IA	Gene gain/My	1.57521
DTORR	Patho Non-IA	Gene gain/My	5.19818
NCOCC	Patho IA	Gene gain/My	2.50753
NPUNI	Patho Non-IA	Gene gain/My	1.48172
NHEDE	Patho Non-IA	Gene gain/My	0.730325
NGALL	Patho IA	Gene gain/My	1.61903
NDITI	Patho IA	Gene gain/My	0.249082
CCYLI	Patho Non-IA	Gene gain/My	2.83809
CFUCK	Patho IA	Gene gain/My	0.774447
CACIC	Patho Non-IA	Gene gain/My	0.314316
CHONGH	Non-Patho Non-IA	Gene gain/My	0.628631
CFUJI	Patho Non-IA	Gene gain/My	0.223733
CPSEUR	Patho Non-IA	Gene gain/My	0.931743
CCROU	Patho Non-IA	Gene gain/My	0.465871
CPAUC	Patho Non-IA	Gene gain/My	0.873805
CLEUCT	Patho Non-IA	Gene gain/My	0.881022
CHONGK	Patho Non-IA	Gene gain/My	0.490894
CPSEUT	Non-Patho Non-IA	Gene gain/My	0.818157
CILIC	Patho Non-IA	Gene gain/My	2.01556
CPSEUN	Patho Non-IA	Gene gain/My	0.836778
CHENR	Patho Non-IA	Gene gain/My	3.0124
CNAVI	Non-Patho Non-IA	Gene gain/My	3.68197
TRUBI	Patho Non-IA	Gene gain/My	0.17198
APENI	Non-Patho Non-IA	Gene gain/My	0.634661
CPACH	Patho Non-IA	Gene gain/My	0.0601812
PBUXI	Patho Non-IA	Gene gain/My	0.102616
PFOLI	Patho Non-IA	Gene gain/My	0.0410464
SNORV	Non-Patho Non-IA	Gene gain/My	0.140749
XRECI	Non-Patho Non-IA	Gene gain/My	0.140749
DAUST	Patho IA	Gene gain/My	1.91952
DNEOC	Patho Non-IA	Gene gain/My	1.69369
DEUCA	Non-Patho Non-IA	Gene gain/My	3.78472
DVIRE	Patho Non-IA	Gene gain/My	0.135081
ELARI	Patho IA	Gene gain/My	0
EPOLO	Patho IA	Gene gain/My	0.189216
CEUCA	Patho IA	Gene gain/My	0
CFIMB	Patho IA	Gene gain/My	0
CMANG	Patho IA	Gene gain/My	0
CCACA	Patho IA	Gene gain/My	0.118991
CPLAT	Patho IA	Gene gain/My	0.167195
CALBI	Patho IA	Gene gain/My	0.03766
CHARR	Patho Non-IA	Gene gain/My	0.0726812
CSMAL	Patho IA	Gene gain/My	0.218044
CPOPU	Non-Patho Non-IA	Gene gain/My	0.500179
CTHIE	Non-Patho Non-IA	Gene gain/My	0.150054
BBASI	Patho Non-IA	Gene gain/My	0.0376487
TETHA	Patho IA	Gene gain/My	0.15508
TMUSA	Patho Non-IA	Gene gain/My	0.15508
TEURI	Non-Patho Non-IA	Gene gain/My	0.163557
TPUNC	Patho Non-IA	Gene gain/My	0.267266
CADIP	Non-Patho Non-IA	Gene gain/My	0.041054
AXYLE	Patho IA	Gene gain/My	0.0273694
BFAGA	Patho IA	Gene gain/My	0.146694
KCAPE	Non-Patho IA	Gene gain/My	0.0442079
KPROT	Non-Patho IA	Gene gain/My	0.0442079
SAPIO	Patho Non-IA	Gene gain/My	0.177208
SBOYD	Patho Non-IA	Gene gain/My	0.141767
SDEHO	Patho Non-IA	Gene gain/My	0.148904
SAURA	Patho Non-IA	Gene gain/My	0.122771
LPROL	Patho Non-IA	Gene gain/My	0.112304
SBREV	Patho Non-IA	Gene gain/My	0.323738
BCHLA	Non-Patho Non-IA	Gene gain/My	0.0647477
CTOFI	Non-Patho Non-IA	Gene gain/My	0.127349
CLIRI	Patho Non-IA	Gene gain/My	0.191023
CINCA	Patho Non-IA	Gene gain/My	0.389256
CFALC	Patho Non-IA	Gene gain/My	5.31807
CGRAM	Patho Non-IA	Gene gain/My	0.253241
CELEU	Patho Non-IA	Gene gain/My	0.863254
CSUBL	Patho Non-IA	Gene gain/My	0.618406
CECHI	Patho Non-IA	Gene gain/My	0.532074
CHIGG	Patho Non-IA	Gene gain/My	0.380754
CDEST	Patho Non-IA	Gene gain/My	0.456904
CSHIS	Patho Non-IA	Gene gain/My	0.423706
CLENT	Patho Non-IA	Gene gain/My	0.970208
CTANA	Patho Non-IA	Gene gain/My	0.485104
CCOCC	Patho Non-IA	Gene gain/My	0.173147
CACUT	Patho Non-IA	Gene gain/My	0.0475663
CSCOV	Patho Non-IA	Gene gain/My	0.190265
CNYMP	Patho Non-IA	Gene gain/My	0.197883
CSIMM	Patho Non-IA	Gene gain/My	0.109336
CFIOR	Patho Non-IA	Gene gain/My	0.10786
CSALI	Patho Non-IA	Gene gain/My	0.169497
CORCH	Patho Non-IA	Gene gain/My	0.263986
CCHLO	Patho Non-IA	Gene gain/My	0.0926427
CAENI	Patho Non-IA	Gene gain/My	1.48607
CVINI	Patho Non-IA	Gene gain/My	2.97215
CFRUC	Patho Non-IA	Gene gain/My	1.68082
CTROP	Patho Non-IA	Gene gain/My	0.467748
CSIAM	Patho Non-IA	Gene gain/My	0.935495
CASIA	Patho Non-IA	Gene gain/My	0.654698
CGLOE	Patho Non-IA	Gene gain/My	0.285924
CCAME	Patho Non-IA	Gene gain/My	0.388805
CTHEO	Patho Non-IA	Gene gain/My	0.368519
CKARS	Patho Non-IA	Gene gain/My	0.189376
CSANS	Patho Non-IA	Gene gain/My	1.13626
CTRUN	Patho Non-IA	Gene gain/My	0.0889653
CMUSI	Patho Non-IA	Gene gain/My	1.44316
CPLUR	Patho Non-IA	Gene gain/My	0.481052
CSOJA	Patho Non-IA	Gene gain/My	0.183308
CSIDA	Patho Non-IA	Gene gain/My	0.0604684
CORBI	Patho Non-IA	Gene gain/My	0.120937
CSPIN	Patho Non-IA	Gene gain/My	0.0590602
CTRIF	Patho Non-IA	Gene gain/My	0.209439
CLIND	Patho Non-IA	Gene gain/My	0.104642
FFURC	Non-Patho Non-IA	Gene gain/My	0.085102
PCUCU	Patho Non-IA	Gene gain/My	0.170204
VKLEB	Patho Non-IA	Gene gain/My	0
VISAA	Patho Non-IA	Gene gain/My	0.194553
VTRIC	Patho IA	Gene gain/My	0.175855
VZARE	Patho Non-IA	Gene gain/My	0.144378
VALBO	Patho IA	Gene gain/My	0.105284
VDAHL	Patho IA	Gene gain/My	0.252258
VNONA	Patho IA	Gene gain/My	0.0687975
VNUBI	Patho Non-IA	Gene gain/My	0.126908
SALKA	Non-Patho Non-IA	Gene gain/My	0.0401587
RTULA	Non-Patho Non-IA	Gene gain/My	0.0934422
CNITS	Non-Patho Non-IA	Gene gain/My	0
CMACR	Non-Patho Non-IA	Gene gain/My	0.0554721
CJAPO	Non-Patho Non-IA	Gene gain/My	0
CPARA	Patho Non-IA	Gene gain/My	0.216191
CRADI	Non-Patho Non-IA	Gene gain/My	0.208545
CCARP	Patho Non-IA	Gene gain/My	0.417089
CNATE	Non-Patho Non-IA	Gene gain/My	0.241159
CDISP	Patho Non-IA	Gene gain/My	0.560306
CDEUT	Patho Non-IA	Gene gain/My	0.167782
CAUST	Patho Non-IA	Gene gain/My	0.251673
CCUBE	Patho Non-IA	Gene gain/My	0.216201
CVITI	Patho Non-IA	Gene gain/My	0.0411282
CLUST	Non-Patho Non-IA	Gene gain/My	0.068547
JJUGL	Patho Non-IA	Gene gain/My	1.30283
JOBLO	Patho Non-IA	Gene gain/My	0.579035
OCLAV	Patho Non-IA	Gene gain/My	0.425025
DASPA	Patho Non-IA	Gene gain/My	0.2506
SMAYD	Patho Non-IA	Gene gain/My	0.459433
DCITRC	Non-Patho Non-IA	Gene gain/My	0.314491
DCITRI	Patho Non-IA	Gene gain/My	0.314491
DCAPS	Patho Non-IA	Gene gain/My	0.192878
DAMPE	Patho Non-IA	Gene gain/My	0.300873
DLONG	Patho Non-IA	Gene gain/My	0.488918
DDEST	Patho Non-IA	Gene gain/My	0.295257
DHELI	Patho Non-IA	Gene gain/My	0.128278
DCITRA	Patho Non-IA	Gene gain/My	0.15505
CPICE	Patho Non-IA	Gene gain/My	0.087832
VMALIC	Non-Patho Non-IA	Gene gain/My	0.105398
VSORD	Patho Non-IA	Gene gain/My	0.0328872
VMALI	Patho Non-IA	Gene gain/My	0.0408182
CLEUCS	Patho Non-IA	Gene gain/My	0.0594641
PMINI	Patho Non-IA	Gene gain/My	0.132367
ONOVO	Patho IA	Gene gain/My	0
OULM785401	Patho IA	Gene gain/My	0.701309
OHIMA1	Patho IA	Gene gain/My	0
OQUER1	Non-Patho IA	Gene gain/My	0.246172
OTRIA	Non-Patho IA	Gene gain/My	0.458722
OPERF	Non-Patho IA	Gene gain/My	0.167477
OPICE	Non-Patho IA	Gene gain/My	0.167477
OIPS1	Non-Patho IA	Gene gain/My	0.577543
OMONT	Non-Patho IA	Gene gain/My	0.288772
OPOPU	Non-Patho IA	Gene gain/My	0.763304
SBRAS	Patho Non-IA	Gene gain/My	0.333189
SSCHE	Patho Non-IA	Gene gain/My	0.0832972
SGLOB	Patho Non-IA	Gene gain/My	0.273323
SPHAS	Non-Patho IA	Gene gain/My	0.140384
OSTEN	Non-Patho IA	Gene gain/My	0.544367
SVARI	Non-Patho IA	Gene gain/My	2.99402
SPALL	Patho Non-IA	Gene gain/My	0.326878
CMINU	Non-Patho IA	Gene gain/My	0.654289
CBREV	Non-Patho IA	Gene gain/My	0.53161
HLIGN	Non-Patho IA	Gene gain/My	0.391403
SINSE	Patho IA	Gene gain/My	0.0520704
FPURP	Non-Patho IA	Gene gain/My	0.0520704
LWAGE	Patho IA	Gene gain/My	0
LWING	Patho IA	Gene gain/My	0.161971
GCLAV	Patho IA	Gene gain/My	0.149828
LLONG	Non-Patho IA	Gene gain/My	0.178737
LLUND	Non-Patho IA	Gene gain/My	0.0572212
LSERP	Patho IA	Gene gain/My	0.406597
LPROC	Patho IA	Gene gain/My	0.887812
GGALE	Non-Patho IA	Gene gain/My	0.269315
RQUERI	Patho IA	Gene gain/My	0.0796038
RQUERU	Non-Patho IA	Gene gain/My	0.159208
RSULP	Non-Patho IA	Gene gain/My	0.07606
EVERM	Patho Non-IA	Gene gain/My	0.174284
GPENI	Non-Patho IA	Gene gain/My	0.056982
RAGUA	Non-Patho IA	Gene gain/My	0.201783
RLAUR	Patho IA	Gene gain/My	0.0474783
RALBI	Non-Patho IA	Gene gain/My	0.215591
RAMBR	Non-Patho IA	Gene gain/My	0.167682
RARXI	Non-Patho IA	Gene gain/My	0.20476
GFRAG	Non-Patho IA	Gene gain/My	0.0987724
PCURV	Non-Patho Non-IA	Gene gain/My	0.236333
PLIGN	Non-Patho Non-IA	Gene gain/My	0.415407
ODOLI	Non-Patho Non-IA	Gene gain/My	0.191726
MINCR	Patho Non-IA	Gene gain/My	0.166078
MRHIZ	Patho Non-IA	Gene gain/My	0.193758
GTRIT	Patho Non-IA	Gene gain/My	0.181041
FORYZ	Non-Patho Non-IA	Gene gain/My	0.371572
NAORYZ	Patho Non-IA	Gene gain/My	0.11713
PORYZ	Patho Non-IA	Gene gain/My	0.0790879
PGRIS	Patho Non-IA	Gene gain/My	0.237264
PPENN	Patho Non-IA	Gene gain/My	0.0555064
NCRAS	Non-Patho Non-IA	Gene gain/My	0
NTETRE	Non-Patho Non-IA	Gene gain/My	0.678162
NDISC	Non-Patho Non-IA	Gene gain/My	0.310594
NAFRI	Non-Patho Non-IA	Gene gain/My	0.283128
NCERE	Non-Patho Non-IA	Gene gain/My	0.044504
NTETRA	Non-Patho Non-IA	Gene gain/My	0.0994929
NSUBL	Non-Patho Non-IA	Gene gain/My	0.795943
SMACR	Non-Patho Non-IA	Gene gain/My	0.1737
TTHER	Non-Patho Non-IA	Gene gain/My	0.288646
CGLOB	Patho Non-IA	Gene gain/My	3.31942
TGRIS	Non-Patho Non-IA	Gene gain/My	0.339078
TTERR	Non-Patho Non-IA	Gene gain/My	0.21873
ANIGRI	Non-Patho Non-IA	Gene gain/My	0.151407
TUNIS	Non-Patho Non-IA	Gene gain/My	0.305743
CTHER	Non-Patho Non-IA	Gene gain/My	0.148846
PANSE	Non-Patho Non-IA	Gene gain/My	0.195932
PCOMA	Non-Patho Non-IA	Gene gain/My	0.0489829
PMAYD	Patho Non-IA	Gene gain/My	0.119957
CPRUN	Patho Non-IA	Gene gain/My	0.173142
CLIGN	Patho Non-IA	Gene gain/My	0.363599
CHOFF	Patho Non-IA	Gene gain/My	0.312195
CPULV	Patho Non-IA	Gene gain/My	0.0611166
AMALA	Non-Patho Non-IA	Gene gain/My	0.111117
APHAE	Patho Non-IA	Gene gain/My	0.361132
NIORYZ	Patho IA	Gene gain/My	0.153646
NSPHA	Patho Non-IA	Gene gain/My	0.0438989
PFICI	Non-Patho Non-IA	Gene gain/My	0
PTHEA	Non-Patho Non-IA	Gene gain/My	0.0659772
NCLAV	Patho Non-IA	Gene gain/My	0.233147
PKENY	Patho Non-IA	Gene gain/My	0.148425
PVEXA	Non-Patho Non-IA	Gene gain/My	0.0887062
XFLAB	Non-Patho Non-IA	Gene gain/My	0.574043
XLONG	Non-Patho Non-IA	Gene gain/My	1.3203
XPOLY	Non-Patho Non-IA	Gene gain/My	0.728317
XHYPO	Non-Patho Non-IA	Gene gain/My	0.417953
XMULT	Non-Patho Non-IA	Gene gain/My	0.759914
XGRAM	Non-Patho Non-IA	Gene gain/My	0.931022
KDEUS	Patho Non-IA	Gene gain/My	0.378759
RNECA	Patho Non-IA	Gene gain/My	0.202808
DRIGI	Non-Patho Non-IA	Gene gain/My	0.199086
ECINC	Non-Patho Non-IA	Gene gain/My	0.221933
ASTYG	Non-Patho Non-IA	Gene gain/My	0.310176
ATRUN	Patho Non-IA	Gene gain/My	0.24814
JMULT	Non-Patho Non-IA	Gene gain/My	0.364324
HPULI	Non-Patho Non-IA	Gene gain/My	0.228548
DCONC	Non-Patho IA	Gene gain/My	0.482171
DCHIL	Non-Patho Non-IA	Gene gain/My	0.783528
DESCH	Non-Patho IA	Gene gain/My	0.468773
ELIQU	Non-Patho Non-IA	Gene gain/My	1.13845
PHUNT	Non-Patho Non-IA	Gene gain/My	0.408715
HLIEN	Non-Patho Non-IA	Gene gain/My	0.220094
HSUBM	Non-Patho Non-IA	Gene gain/My	1.13199
HMONT	Non-Patho Non-IA	Gene gain/My	0.732464
HRICK	Non-Patho Non-IA	Gene gain/My	0.19651
HFRAG	Non-Patho Non-IA	Gene gain/My	0.224583
HRUBI	Non-Patho Non-IA	Gene gain/My	0.202989
MCANN	Patho Non-IA	Gene gain/My	0.150595
MIBER	Non-Patho Non-IA	Gene gain/My	0.219047
DPULV	Patho Non-IA	Gene gain/My	0.231476
MBOLL	Patho Non-IA	Gene gain/My	0.0816118
