# Supplementary material for: Lifestyles shape genome size and gene content in fungal pathogens
Source: eLife. 2025 Dec 16;14:RP104975. doi: 10.7554/eLife.104975 (PMC12707824; doi:10.7554/eLife.104975)
Supplement: Figure 5—source data 1. [file elife-104975-fig5-data1.xlsx]

## Sheet: Figure5_SourceData1
trait	clade	change	groups	group
CAZy	C	0.0545425	1	CAZy
CAZy	D	0.103175	1	CAZy
CAZy	G	0.270421	1	CAZy
CAZy	H1	0.304906	1	CAZy
CAZy	H2.1	-0.069751	1	CAZy
CAZy	H2.2	-0.0624026	1	CAZy
CAZy	H2.3	0.10884	1	CAZy
CAZy	H2.4	-0.218951	1	CAZy
CAZy	H2.5	0.0275243	1	CAZy
CAZy	H2.6	-0.0572304	1	CAZy
CAZy	H2.7	0.221935	1	CAZy
CAZy	H2.8	-0.277732	1	CAZy
CAZy	H2.9	-0.00127561	1	CAZy
CAZy	M1	-0.418382	1	CAZy
CAZy	M2	0.00275311	1	CAZy
CAZy	Ma	0.010584	1	CAZy
CAZy	O	-0.293168	1	CAZy
CAZy	S	-0.108918	1	CAZy
CAZy	X	0.0014986	1	CAZy
AA	C	0.0140929	1	CAZy
AA	D	0.24907	1	CAZy
AA	G	0.325448	1	CAZy
AA	H1	0.352354	1	CAZy
AA	H2.1	-0.163449	1	CAZy
AA	H2.2	-0.0324164	1	CAZy
AA	H2.3	0.207375	1	CAZy
AA	H2.4	-0.148081	1	CAZy
AA	H2.5	-0.132283	1	CAZy
AA	H2.6	-0.0865169	1	CAZy
AA	H2.7	0.582338	1	CAZy
AA	H2.8	-0.35508	1	CAZy
AA	H2.9	-0.0205277	1	CAZy
AA	M1	-0.560199	1	CAZy
AA	M2	0.189761	1	CAZy
AA	Ma	0.191198	1	CAZy
AA	O	-0.441014	1	CAZy
AA	S	-0.03397	1	CAZy
AA	X	0.115098	1	CAZy
CBM	C	0.105263	1	CAZy
CBM	D	0.0162389	1	CAZy
CBM	G	0.187679	1	CAZy
CBM	H1	0.268347	1	CAZy
CBM	H2.1	-0.129115	1	CAZy
CBM	H2.2	-0.027969	1	CAZy
CBM	H2.3	0.132263	1	CAZy
CBM	H2.4	-0.366653	1	CAZy
CBM	H2.5	0.131725	1	CAZy
CBM	H2.6	-0.0199264	1	CAZy
CBM	H2.7	0.387051	1	CAZy
CBM	H2.8	-0.339862	1	CAZy
CBM	H2.9	0.170555	1	CAZy
CBM	M1	-0.555203	1	CAZy
CBM	M2	0.203445	1	CAZy
CBM	Ma	0.102154	1	CAZy
CBM	O	-0.41404	1	CAZy
CBM	S	-0.00720448	1	CAZy
CBM	X	0.0285225	1	CAZy
CE	C	0.053456	1	CAZy
CE	D	-0.0450741	1	CAZy
CE	G	0.429957	1	CAZy
CE	H1	0.809021	1	CAZy
CE	H2.1	-0.18556	1	CAZy
CE	H2.2	-0.0105832	1	CAZy
CE	H2.3	0.0225229	1	CAZy
CE	H2.4	-0.371266	1	CAZy
CE	H2.5	0.109048	1	CAZy
CE	H2.6	-0.0569915	1	CAZy
CE	H2.7	0.191139	1	CAZy
CE	H2.8	-0.438304	1	CAZy
CE	H2.9	-0.018904	1	CAZy
CE	M1	-0.547514	1	CAZy
CE	M2	0.189495	1	CAZy
CE	Ma	0.131161	1	CAZy
CE	O	-0.404872	1	CAZy
CE	S	-0.00438083	1	CAZy
CE	X	-0.125488	1	CAZy
GH	C	0.0821015	1	CAZy
GH	D	0.116915	1	CAZy
GH	G	0.295944	1	CAZy
GH	H1	0.271893	1	CAZy
GH	H2.1	-0.0427784	1	CAZy
GH	H2.2	-0.11331	1	CAZy
GH	H2.3	0.0873125	1	CAZy
GH	H2.4	-0.285539	1	CAZy
GH	H2.5	0.0558574	1	CAZy
GH	H2.6	-0.0765143	1	CAZy
GH	H2.7	0.20562	1	CAZy
GH	H2.8	-0.297347	1	CAZy
GH	H2.9	0.0314842	1	CAZy
GH	M1	-0.445506	1	CAZy
GH	M2	-0.0611382	1	CAZy
GH	Ma	-0.0417617	1	CAZy
GH	O	-0.292809	1	CAZy
GH	S	-0.174329	1	CAZy
GH	X	0.00564149	1	CAZy
GT	C	0.0213396	1	CAZy
GT	D	0.0557958	1	CAZy
GT	G	0.116141	1	CAZy
GT	H1	0.17188	1	CAZy
GT	H2.1	-0.0460356	1	CAZy
GT	H2.2	-0.0122828	1	CAZy
GT	H2.3	0.116741	1	CAZy
GT	H2.4	-0.100746	1	CAZy
GT	H2.5	0.0382546	1	CAZy
GT	H2.6	0.00120584	1	CAZy
GT	H2.7	0.00994576	1	CAZy
GT	H2.8	-0.132683	1	CAZy
GT	H2.9	-0.0157605	1	CAZy
GT	M1	-0.213804	1	CAZy
GT	M2	-0.0239722	1	CAZy
GT	Ma	-0.00921239	1	CAZy
GT	O	-0.147603	1	CAZy
GT	S	-0.0457149	1	CAZy
GT	X	-0.0734565	1	CAZy
PL	C	0.0194388	1	CAZy
PL	D	0.381118	1	CAZy
PL	G	0.992459	1	CAZy
PL	H1	0.586156	1	CAZy
PL	H2.1	-0.619345	1	CAZy
PL	H2.2	-0.619345	1	CAZy
PL	H2.3	0.078818	1	CAZy
PL	H2.4	-0.625422	1	CAZy
PL	H2.5	-0.383238	1	CAZy
PL	H2.6	-0.657119	1	CAZy
PL	H2.7	1.22195	1	CAZy
PL	H2.8	-0.658446	1	CAZy
PL	H2.9	-0.470592	1	CAZy
PL	M1	-0.600289	1	CAZy
PL	M2	-0.340159	1	CAZy
PL	Ma	-0.244797	1	CAZy
PL	O	-0.635142	1	CAZy
PL	S	-0.280396	1	CAZy
PL	X	0.0815394	1	CAZy
MEROPS	C	0.0481465	3	other
MEROPS	D	0.124765	3	other
MEROPS	G	0.173452	3	other
MEROPS	H1	0.137253	3	other
MEROPS	H2.1	-0.133498	3	other
MEROPS	H2.2	-0.132407	3	other
MEROPS	H2.3	0.151448	3	other
MEROPS	H2.4	-0.173302	3	other
MEROPS	H2.5	-0.0419353	3	other
MEROPS	H2.6	0.108273	3	other
MEROPS	H2.7	0.0505927	3	other
MEROPS	H2.8	-0.27074	3	other
MEROPS	H2.9	-0.0330202	3	other
MEROPS	M1	-0.313785	3	other
MEROPS	M2	-0.0703369	3	other
MEROPS	Ma	-0.0208409	3	other
MEROPS	O	-0.19971	3	other
MEROPS	S	-0.190271	3	other
MEROPS	X	0.000412328	3	other
TFs	C	0.0625727	3	other
TFs	D	0.0196146	3	other
TFs	G	0.0890476	3	other
TFs	H1	0.312365	3	other
TFs	H2.1	-0.117665	3	other
TFs	H2.2	-0.0680361	3	other
TFs	H2.3	0.0921801	3	other
TFs	H2.4	-0.23268	3	other
TFs	H2.5	0.0101299	3	other
TFs	H2.6	0.0497383	3	other
TFs	H2.7	0.0696971	3	other
TFs	H2.8	-0.165086	3	other
TFs	H2.9	-0.0231815	3	other
TFs	M1	-0.299159	3	other
TFs	M2	0.038212	3	other
TFs	Ma	-0.100757	3	other
TFs	O	-0.06551	3	other
TFs	S	-0.161387	3	other
TFs	X	-0.193254	3	other
effectors	C	0.0784026	3	other
effectors	D	0.145264	3	other
effectors	G	0.525922	3	other
effectors	H1	0.471123	3	other
effectors	H2.1	-0.186944	3	other
effectors	H2.2	-0.170985	3	other
effectors	H2.3	0.184549	3	other
effectors	H2.4	-0.0526954	3	other
effectors	H2.5	-0.16075	3	other
effectors	H2.6	0.0506522	3	other
effectors	H2.7	-0.0525543	3	other
effectors	H2.8	-0.528502	3	other
effectors	H2.9	0.0101903	3	other
effectors	M1	-0.427846	3	other
effectors	M2	0.0833246	3	other
effectors	Ma	0.378713	3	other
effectors	O	-0.556543	3	other
effectors	S	-0.104837	3	other
effectors	X	0.0997341	3	other
tRNA	C	0.284712	3	other
tRNA	D	-0.141427	3	other
tRNA	G	0.663571	3	other
tRNA	H1	0.637104	3	other
tRNA	H2.1	0.0381115	3	other
tRNA	H2.2	-0.0273512	3	other
tRNA	H2.3	0.209819	3	other
tRNA	H2.4	-0.152852	3	other
tRNA	H2.5	0.344463	3	other
tRNA	H2.6	-0.20097	3	other
tRNA	H2.7	-0.0171686	3	other
tRNA	H2.8	0.0802211	3	other
tRNA	H2.9	-0.195625	3	other
tRNA	M1	0.401281	3	other
tRNA	M2	0.171036	3	other
tRNA	Ma	0.0777667	3	other
tRNA	O	0.064618	3	other
tRNA	S	0.318729	3	other
tRNA	X	0.00872591	3	other
SMC	C	-0.106382	2	SMC
SMC	D	0.706426	2	SMC
SMC	G	0.463752	2	SMC
SMC	H1	0.068533	2	SMC
SMC	H2.1	-0.132296	2	SMC
SMC	H2.2	0.149215	2	SMC
SMC	H2.3	0.288189	2	SMC
SMC	H2.4	0.082131	2	SMC
SMC	H2.5	-0.108455	2	SMC
SMC	H2.6	-0.168519	2	SMC
SMC	H2.7	0.270054	2	SMC
SMC	H2.8	-0.611911	2	SMC
SMC	H2.9	-0.183396	2	SMC
SMC	M1	-0.665036	2	SMC
SMC	M2	-0.11722	2	SMC
SMC	Ma	-0.0079635	2	SMC
SMC	O	-0.45805	2	SMC
SMC	S	-0.247376	2	SMC
SMC	X	0.257596	2	SMC
hybrid	C	0.188123	2	SMC
hybrid	D	0.754189	2	SMC
hybrid	G	0.386818	2	SMC
hybrid	H1	0.148639	2	SMC
hybrid	H2.1	-0.327837	2	SMC
hybrid	H2.2	0.0292494	2	SMC
hybrid	H2.3	0.364165	2	SMC
hybrid	H2.4	-0.500625	2	SMC
hybrid	H2.5	0.288824	2	SMC
hybrid	H2.6	0.690423	2	SMC
hybrid	H2.7	-0.105634	2	SMC
hybrid	H2.8	-0.453711	2	SMC
hybrid	H2.9	0.0470544	2	SMC
hybrid	M1	-1	2	SMC
hybrid	M2	0.312606	2	SMC
hybrid	Ma	0.496408	2	SMC
hybrid	O	-0.616467	2	SMC
hybrid	S	-0.242086	2	SMC
hybrid	X	-0.0505882	2	SMC
indole	C	-1	2	SMC
indole	D	0.845066	2	SMC
indole	G	2.92958	2	SMC
indole	H1	0.501545	2	SMC
indole	H2.1	1.3678	2	SMC
indole	H2.2	-0.447513	2	SMC
indole	H2.3	1.1411	2	SMC
indole	H2.4	0.331815	2	SMC
indole	H2.5	-0.826044	2	SMC
indole	H2.6	-0.663685	2	SMC
indole	H2.7	0.0997609	2	SMC
indole	H2.8	-1	2	SMC
indole	H2.9	-1	2	SMC
indole	M1	-1	2	SMC
indole	M2	-0.590666	2	SMC
indole	Ma	0.447715	2	SMC
indole	O	-0.913827	2	SMC
indole	S	-0.365818	2	SMC
indole	X	0.535968	2	SMC
nrps	C	-0.0694606	2	SMC
nrps	D	0.29966	2	SMC
nrps	G	0.275787	2	SMC
nrps	H1	0.189461	2	SMC
nrps	H2.1	-0.205851	2	SMC
nrps	H2.2	0.191223	2	SMC
nrps	H2.3	0.244578	2	SMC
nrps	H2.4	-0.0815117	2	SMC
nrps	H2.5	-0.229045	2	SMC
nrps	H2.6	0.0771782	2	SMC
nrps	H2.7	-0.192519	2	SMC
nrps	H2.8	-0.787961	2	SMC
nrps	H2.9	-0.399222	2	SMC
nrps	M1	-0.652452	2	SMC
nrps	M2	0.113711	2	SMC
nrps	Ma	0.0382615	2	SMC
nrps	O	-0.622907	2	SMC
nrps	S	-0.135722	2	SMC
nrps	X	-0.0842497	2	SMC
other	C	-0.391465	2	SMC
other	D	0.535511	2	SMC
other	G	0.520834	2	SMC
other	H1	0.272403	2	SMC
other	H2.1	-0.296848	2	SMC
other	H2.2	0.162153	2	SMC
other	H2.3	0.219439	2	SMC
other	H2.4	0.3648	2	SMC
other	H2.5	0.0559181	2	SMC
other	H2.6	0.103482	2	SMC
other	H2.7	-0.0807892	2	SMC
other	H2.8	-0.10819	2	SMC
other	H2.9	-0.299292	2	SMC
other	M1	-0.548685	2	SMC
other	M2	-0.0570743	2	SMC
other	Ma	-0.341436	2	SMC
other	O	-0.104335	2	SMC
other	S	-0.451125	2	SMC
other	X	0.332341	2	SMC
pks	C	-0.125738	2	SMC
pks	D	0.698306	2	SMC
pks	G	0.0880955	2	SMC
pks	H1	-0.317051	2	SMC
pks	H2.1	-0.0831528	2	SMC
pks	H2.2	0.18766	2	SMC
pks	H2.3	0.41514	2	SMC
pks	H2.4	0.0362017	2	SMC
pks	H2.5	0.125545	2	SMC
pks	H2.6	-0.271815	2	SMC
pks	H2.7	0.0341548	2	SMC
pks	H2.8	-0.507292	2	SMC
pks	H2.9	-0.349373	2	SMC
pks	M1	-0.642532	2	SMC
pks	M2	-0.354403	2	SMC
pks	Ma	-0.0369051	2	SMC
pks	O	-0.470933	2	SMC
pks	S	-0.354411	2	SMC
pks	X	0.511145	2	SMC
terpene	C	0.253324	2	SMC
terpene	D	0.403738	2	SMC
terpene	G	0.477499	2	SMC
terpene	H1	0.218841	2	SMC
terpene	H2.1	0.151017	2	SMC
terpene	H2.2	0.179792	2	SMC
terpene	H2.3	0.00994384	2	SMC
terpene	H2.4	0.0945086	2	SMC
terpene	H2.5	-0.0261506	2	SMC
terpene	H2.6	-0.283331	2	SMC
terpene	H2.7	0.200196	2	SMC
terpene	H2.8	-0.350157	2	SMC
terpene	H2.9	0.181533	2	SMC
terpene	M1	-0.506163	2	SMC
terpene	M2	-0.176459	2	SMC
terpene	Ma	-0.0842247	2	SMC
terpene	O	-0.275159	2	SMC
terpene	S	-0.218516	2	SMC
terpene	X	0.333171	2	SMC
A	C	0.025055	0	KOG
A	D	0.0207661	0	KOG
A	G	0.0152852	0	KOG
A	H1	0.0461971	0	KOG
A	H2.1	-0.00887624	0	KOG
A	H2.2	-0.00168995	0	KOG
A	H2.3	0.01307	0	KOG
A	H2.4	-0.0241761	0	KOG
A	H2.5	0.00895331	0	KOG
A	H2.6	0.00430088	0	KOG
A	H2.7	0.020681	0	KOG
A	H2.8	-0.0219126	0	KOG
A	H2.9	-0.0187626	0	KOG
A	M1	-0.02472	0	KOG
A	M2	0.00869126	0	KOG
A	Ma	0.00867984	0	KOG
A	O	-0.0402478	0	KOG
A	S	0.0123317	0	KOG
A	X	-0.00402842	0	KOG
B	C	0.0144997	0	KOG
B	D	0.0241583	0	KOG
B	G	0.0195806	0	KOG
B	H1	0.0715583	0	KOG
B	H2.1	0.115581	0	KOG
B	H2.2	-0.0233347	0	KOG
B	H2.3	0.00029119	0	KOG
B	H2.4	-0.030679	0	KOG
B	H2.5	-0.0125264	0	KOG
B	H2.6	0.0069347	0	KOG
B	H2.7	-0.000294532	0	KOG
B	H2.8	-0.0435541	0	KOG
B	H2.9	-0.0276133	0	KOG
B	M1	-0.10401	0	KOG
B	M2	0.0594324	0	KOG
B	Ma	0.0203428	0	KOG
B	O	-0.0715044	0	KOG
B	S	-0.0171722	0	KOG
B	X	-0.0854359	0	KOG
C	C	0.043743	0	KOG
C	D	0.0755601	0	KOG
C	G	0.162889	0	KOG
C	H1	0.233306	0	KOG
C	H2.1	-0.0856973	0	KOG
C	H2.2	-0.0515423	0	KOG
C	H2.3	0.134732	0	KOG
C	H2.4	-0.184931	0	KOG
C	H2.5	0.0805048	0	KOG
C	H2.6	-0.0793015	0	KOG
C	H2.7	0.0719727	0	KOG
C	H2.8	-0.132086	0	KOG
C	H2.9	-0.0179406	0	KOG
C	M1	-0.290209	0	KOG
C	M2	0.0521252	0	KOG
C	Ma	-0.128959	0	KOG
C	O	-0.121022	0	KOG
C	S	-0.128913	0	KOG
C	X	0.0266027	0	KOG
D	C	-0.00488905	0	KOG
D	D	-0.00318701	0	KOG
D	G	0.0105113	0	KOG
D	H1	0.0495685	0	KOG
D	H2.1	-0.0102567	0	KOG
D	H2.2	0.00412641	0	KOG
D	H2.3	0.0578116	0	KOG
D	H2.4	0.0385265	0	KOG
D	H2.5	-0.00364477	0	KOG
D	H2.6	0.00857854	0	KOG
D	H2.7	-0.00473608	0	KOG
D	H2.8	-0.0236046	0	KOG
D	H2.9	0.00487356	0	KOG
D	M1	-0.0177159	0	KOG
D	M2	0.014167	0	KOG
D	Ma	0.0181082	0	KOG
D	O	-0.0437754	0	KOG
D	S	0.0250132	0	KOG
D	X	-0.0479325	0	KOG
E	C	0.0235513	0	KOG
E	D	0.067852	0	KOG
E	G	0.18179	0	KOG
E	H1	0.249746	0	KOG
E	H2.1	-0.1103	0	KOG
E	H2.2	-0.0820766	0	KOG
E	H2.3	0.124654	0	KOG
E	H2.4	-0.178647	0	KOG
E	H2.5	-0.0354133	0	KOG
E	H2.6	0.0530992	0	KOG
E	H2.7	-0.0164133	0	KOG
E	H2.8	-0.117006	0	KOG
E	H2.9	-0.0440143	0	KOG
E	M1	-0.229353	0	KOG
E	M2	0.00951025	0	KOG
E	Ma	-0.14305	0	KOG
E	O	-0.0803694	0	KOG
E	S	-0.158658	0	KOG
E	X	-0.0198326	0	KOG
F	C	0.047479	0	KOG
F	D	-0.0104739	0	KOG
F	G	0.083741	0	KOG
F	H1	0.0813323	0	KOG
F	H2.1	-0.054221	0	KOG
F	H2.2	-0.0555568	0	KOG
F	H2.3	0.0509793	0	KOG
F	H2.4	-0.116357	0	KOG
F	H2.5	0.0198108	0	KOG
F	H2.6	-0.023092	0	KOG
F	H2.7	0.0471627	0	KOG
F	H2.8	0.0224789	0	KOG
F	H2.9	-0.0479091	0	KOG
F	M1	-0.128824	0	KOG
F	M2	-0.0864459	0	KOG
F	Ma	-0.140997	0	KOG
F	O	-0.0539162	0	KOG
F	S	-0.130599	0	KOG
F	X	-0.0460787	0	KOG
G	C	0.0319653	0	KOG
G	D	0.0541114	0	KOG
G	G	0.305989	0	KOG
G	H1	0.241442	0	KOG
G	H2.1	-0.144477	0	KOG
G	H2.2	-0.098518	0	KOG
G	H2.3	0.0463734	0	KOG
G	H2.4	-0.257878	0	KOG
G	H2.5	-0.00242142	0	KOG
G	H2.6	-0.0592384	0	KOG
G	H2.7	0.159667	0	KOG
G	H2.8	-0.130084	0	KOG
G	H2.9	-0.0084047	0	KOG
G	M1	-0.41968	0	KOG
G	M2	0.0194864	0	KOG
G	Ma	-0.13709	0	KOG
G	O	-0.196787	0	KOG
G	S	-0.212555	0	KOG
G	X	-0.0235394	0	KOG
H	C	0.0314522	0	KOG
H	D	0.0118632	0	KOG
H	G	0.101486	0	KOG
H	H1	0.118802	0	KOG
H	H2.1	-0.0419609	0	KOG
H	H2.2	-0.0214665	0	KOG
H	H2.3	0.0915299	0	KOG
H	H2.4	-0.0554682	0	KOG
H	H2.5	-0.00739383	0	KOG
H	H2.6	-0.0154804	0	KOG
H	H2.7	0.0759983	0	KOG
H	H2.8	-0.0899997	0	KOG
H	H2.9	-0.0384903	0	KOG
H	M1	-0.160664	0	KOG
H	M2	0.0276202	0	KOG
H	Ma	-0.102964	0	KOG
H	O	-0.0879621	0	KOG
H	S	-0.0813605	0	KOG
H	X	-0.0543596	0	KOG
I	C	-0.0111687	0	KOG
I	D	0.19664	0	KOG
I	G	0.143226	0	KOG
I	H1	0.152102	0	KOG
I	H2.1	-0.159029	0	KOG
I	H2.2	-0.0585066	0	KOG
I	H2.3	0.147791	0	KOG
I	H2.4	-0.0947595	0	KOG
I	H2.5	-0.0133041	0	KOG
I	H2.6	-0.0337771	0	KOG
I	H2.7	0.0777875	0	KOG
I	H2.8	-0.236458	0	KOG
I	H2.9	-0.0124991	0	KOG
I	M1	-0.275607	0	KOG
I	M2	0.0300461	0	KOG
I	Ma	-0.0791128	0	KOG
I	O	-0.183707	0	KOG
I	S	-0.130519	0	KOG
I	X	0.0535973	0	KOG
J	C	0.0285878	0	KOG
J	D	0.00331327	0	KOG
J	G	0.0160852	0	KOG
J	H1	0.0515799	0	KOG
J	H2.1	-0.0191284	0	KOG
J	H2.2	-0.0110163	0	KOG
J	H2.3	0.0201247	0	KOG
J	H2.4	-0.0566626	0	KOG
J	H2.5	0.00714588	0	KOG
J	H2.6	0.0115564	0	KOG
J	H2.7	0.0205787	0	KOG
J	H2.8	-0.00363625	0	KOG
J	H2.9	-0.00792168	0	KOG
J	M1	-0.0304093	0	KOG
J	M2	-0.00609807	0	KOG
J	Ma	-0.0432089	0	KOG
J	O	-0.0294179	0	KOG
J	S	-0.0196437	0	KOG
J	X	-0.0106474	0	KOG
K	C	0.0241193	0	KOG
K	D	0.0239783	0	KOG
K	G	0.0371594	0	KOG
K	H1	0.0742753	0	KOG
K	H2.1	-0.02589	0	KOG
K	H2.2	-0.00821375	0	KOG
K	H2.3	0.022746	0	KOG
K	H2.4	-0.0283881	0	KOG
K	H2.5	0.00809864	0	KOG
K	H2.6	-0.02536	0	KOG
K	H2.7	0.0384096	0	KOG
K	H2.8	-0.0376556	0	KOG
K	H2.9	-0.000366544	0	KOG
K	M1	-0.034612	0	KOG
K	M2	0.0292129	0	KOG
K	Ma	-0.00531847	0	KOG
K	O	-0.0290425	0	KOG
K	S	0.00757338	0	KOG
K	X	-0.0223379	0	KOG
L	C	0.0154857	0	KOG
L	D	0.0424305	0	KOG
L	G	0.0170855	0	KOG
L	H1	0.0943782	0	KOG
L	H2.1	-0.0141215	0	KOG
L	H2.2	-0.0315302	0	KOG
L	H2.3	0.0709389	0	KOG
L	H2.4	0.0276211	0	KOG
L	H2.5	-0.0393582	0	KOG
L	H2.6	-0.0362864	0	KOG
L	H2.7	0.0044466	0	KOG
L	H2.8	-0.0907441	0	KOG
L	H2.9	-0.0372584	0	KOG
L	M1	-0.0631535	0	KOG
L	M2	0.00776485	0	KOG
L	Ma	0.0295493	0	KOG
L	O	-0.0836268	0	KOG
L	S	0.00565994	0	KOG
L	X	-0.0413617	0	KOG
M	C	0.0519632	0	KOG
M	D	0.112709	0	KOG
M	G	0.228151	0	KOG
M	H1	0.151186	0	KOG
M	H2.1	-0.0979341	0	KOG
M	H2.2	-0.0221781	0	KOG
M	H2.3	0.049707	0	KOG
M	H2.4	-0.182114	0	KOG
M	H2.5	-0.0165118	0	KOG
M	H2.6	-0.0772417	0	KOG
M	H2.7	0.233339	0	KOG
M	H2.8	-0.229442	0	KOG
M	H2.9	0.0381769	0	KOG
M	M1	-0.20811	0	KOG
M	M2	-0.0138106	0	KOG
M	Ma	0.0410435	0	KOG
M	O	-0.225414	0	KOG
M	S	-0.0700541	0	KOG
M	X	-0.0452974	0	KOG
N	C	0.0480956	0	KOG
N	D	0.0533872	0	KOG
N	G	0.0915361	0	KOG
N	H1	0.0210756	0	KOG
N	H2.1	-0.120248	0	KOG
N	H2.2	0.0457424	0	KOG
N	H2.3	-0.14897	0	KOG
N	H2.4	0.0366067	0	KOG
N	H2.5	-0.080454	0	KOG
N	H2.6	0.00585428	0	KOG
N	H2.7	0.038282	0	KOG
N	H2.8	0.0286101	0	KOG
N	H2.9	0.0286101	0	KOG
N	M1	0.0987538	0	KOG
N	M2	0.0987538	0	KOG
N	Ma	-0.0271823	0	KOG
N	O	0.141572	0	KOG
N	S	0.00699383	0	KOG
N	X	-0.055336	0	KOG
O	C	0.0422271	0	KOG
O	D	0.0258328	0	KOG
O	G	0.0577886	0	KOG
O	H1	0.0799678	0	KOG
O	H2.1	-0.0577483	0	KOG
O	H2.2	-0.028656	0	KOG
O	H2.3	0.0625236	0	KOG
O	H2.4	-0.0740993	0	KOG
O	H2.5	-0.0294107	0	KOG
O	H2.6	0.0455424	0	KOG
O	H2.7	0.0410462	0	KOG
O	H2.8	-0.0937484	0	KOG
O	H2.9	-0.00255768	0	KOG
O	M1	-0.123933	0	KOG
O	M2	-0.0157053	0	KOG
O	Ma	0.0128973	0	KOG
O	O	-0.108816	0	KOG
O	S	-0.0429614	0	KOG
O	X	-0.0134293	0	KOG
P	C	0.00066133	0	KOG
P	D	-0.0211981	0	KOG
P	G	0.177419	0	KOG
P	H1	0.161016	0	KOG
P	H2.1	-0.0836032	0	KOG
P	H2.2	-0.0455933	0	KOG
P	H2.3	0.0925935	0	KOG
P	H2.4	-0.0836893	0	KOG
P	H2.5	-0.0848966	0	KOG
P	H2.6	0.0188214	0	KOG
P	H2.7	0.121331	0	KOG
P	H2.8	-0.144434	0	KOG
P	H2.9	0.0817259	0	KOG
P	M1	-0.192058	0	KOG
P	M2	0.0252743	0	KOG
P	Ma	0.0697755	0	KOG
P	O	-0.14898	0	KOG
P	S	-0.0535429	0	KOG
P	X	-0.0423782	0	KOG
Q	C	0.0327586	0	KOG
Q	D	0.347927	0	KOG
Q	G	0.356898	0	KOG
Q	H1	0.318973	0	KOG
Q	H2.1	-0.286229	0	KOG
Q	H2.2	-0.15622	0	KOG
Q	H2.3	0.153324	0	KOG
Q	H2.4	-0.189406	0	KOG
Q	H2.5	0.0173441	0	KOG
Q	H2.6	-0.086293	0	KOG
Q	H2.7	0.246471	0	KOG
Q	H2.8	-0.330723	0	KOG
Q	H2.9	-0.150357	0	KOG
Q	M1	-0.61892	0	KOG
Q	M2	0.036211	0	KOG
Q	Ma	-0.179	0	KOG
Q	O	-0.289897	0	KOG
Q	S	-0.289397	0	KOG
Q	X	0.142411	0	KOG
R	C	0.0390513	0	KOG
R	D	0.100676	0	KOG
R	G	0.159795	0	KOG
R	H1	0.213975	0	KOG
R	H2.1	-0.085587	0	KOG
R	H2.2	-0.0946041	0	KOG
R	H2.3	0.130707	0	KOG
R	H2.4	-0.169922	0	KOG
R	H2.5	0.0125188	0	KOG
R	H2.6	-0.053404	0	KOG
R	H2.7	0.0873867	0	KOG
R	H2.8	-0.170627	0	KOG
R	H2.9	-0.020164	0	KOG
R	M1	-0.292222	0	KOG
R	M2	-0.00818605	0	KOG
R	Ma	-0.0946189	0	KOG
R	O	-0.162179	0	KOG
R	S	-0.176339	0	KOG
R	X	-0.0451081	0	KOG
S	C	0.0447611	0	KOG
S	D	0.0286621	0	KOG
S	G	0.0657553	0	KOG
S	H1	0.0948559	0	KOG
S	H2.1	-0.0116815	0	KOG
S	H2.2	-0.018513	0	KOG
S	H2.3	0.0527784	0	KOG
S	H2.4	-0.0640142	0	KOG
S	H2.5	-0.00996024	0	KOG
S	H2.6	-0.0139676	0	KOG
S	H2.7	0.0679124	0	KOG
S	H2.8	-0.0387537	0	KOG
S	H2.9	0.0193628	0	KOG
S	M1	-0.063407	0	KOG
S	M2	0.0270021	0	KOG
S	Ma	0.0390812	0	KOG
S	O	-0.0558197	0	KOG
S	S	-0.0160752	0	KOG
S	X	-0.0671252	0	KOG
T	C	-0.00151112	0	KOG
T	D	0.0665876	0	KOG
T	G	0.0640172	0	KOG
T	H1	0.110298	0	KOG
T	H2.1	-0.0284063	0	KOG
T	H2.2	-0.00556127	0	KOG
T	H2.3	0.0846879	0	KOG
T	H2.4	-0.0767628	0	KOG
T	H2.5	-0.0182876	0	KOG
T	H2.6	0.0425857	0	KOG
T	H2.7	0.0247015	0	KOG
T	H2.8	-0.0937519	0	KOG
T	H2.9	0.05356	0	KOG
T	M1	-0.124912	0	KOG
T	M2	0.0305813	0	KOG
T	Ma	-0.0284188	0	KOG
T	O	-0.0530921	0	KOG
T	S	-0.0478339	0	KOG
T	X	-0.0357046	0	KOG
U	C	0.0257506	0	KOG
U	D	0.00778995	0	KOG
U	G	0.0180367	0	KOG
U	H1	0.0376826	0	KOG
U	H2.1	-0.0275856	0	KOG
U	H2.2	0.0033862	0	KOG
U	H2.3	0.00943626	0	KOG
U	H2.4	-0.0438199	0	KOG
U	H2.5	-0.00269092	0	KOG
U	H2.6	0.0133601	0	KOG
U	H2.7	0.0062289	0	KOG
U	H2.8	0.000865422	0	KOG
U	H2.9	-0.00282327	0	KOG
U	M1	-0.0182081	0	KOG
U	M2	-0.00157536	0	KOG
U	Ma	0.0023033	0	KOG
U	O	-0.0336071	0	KOG
U	S	0.00506009	0	KOG
U	X	0.00835733	0	KOG
V	C	0.0167838	0	KOG
V	D	-0.00378925	0	KOG
V	G	0.193085	0	KOG
V	H1	0.291907	0	KOG
V	H2.1	-0.0742233	0	KOG
V	H2.2	-0.173535	0	KOG
V	H2.3	0.0140068	0	KOG
V	H2.4	-0.23707	0	KOG
V	H2.5	0.199465	0	KOG
V	H2.6	-0.113952	0	KOG
V	H2.7	0.139754	0	KOG
V	H2.8	-0.319569	0	KOG
V	H2.9	-0.0171545	0	KOG
V	M1	-0.365449	0	KOG
V	M2	-0.0358114	0	KOG
V	Ma	-0.122571	0	KOG
V	O	-0.231205	0	KOG
V	S	-0.180154	0	KOG
V	X	0.0202615	0	KOG
W	C	0.0868536	0	KOG
W	D	-0.0976974	0	KOG
W	G	0.474291	0	KOG
W	H1	0.13751	0	KOG
W	H2.1	-0.168719	0	KOG
W	H2.2	-0.09806	0	KOG
W	H2.3	0.0663798	0	KOG
W	H2.4	-0.227812	0	KOG
W	H2.5	-0.279129	0	KOG
W	H2.6	0.171288	0	KOG
W	H2.7	0.136426	0	KOG
W	H2.8	0.0984069	0	KOG
W	H2.9	-0.0480474	0	KOG
W	M1	-0.180755	0	KOG
W	M2	-0.277309	0	KOG
W	Ma	0.106092	0	KOG
W	O	-0.151411	0	KOG
W	S	-0.0765296	0	KOG
W	X	-0.132656	0	KOG
Y	C	0.0289626	0	KOG
Y	D	0.0457611	0	KOG
Y	G	0.0207853	0	KOG
Y	H1	0.0196217	0	KOG
Y	H2.1	0.015307	0	KOG
Y	H2.2	0.0103913	0	KOG
Y	H2.3	-0.00883807	0	KOG
Y	H2.4	-0.0113962	0	KOG
Y	H2.5	0.0135279	0	KOG
Y	H2.6	-0.0139517	0	KOG
Y	H2.7	0.0126862	0	KOG
Y	H2.8	-0.0159984	0	KOG
Y	H2.9	-0.00338295	0	KOG
Y	M1	-0.0484155	0	KOG
Y	M2	0.0388994	0	KOG
Y	Ma	-0.0128608	0	KOG
Y	O	-0.0228959	0	KOG
Y	S	0.0116691	0	KOG
Y	X	0.0246864	0	KOG
Z	C	0.0628449	0	KOG
Z	D	-0.0299	0	KOG
Z	G	0.0306574	0	KOG
Z	H1	0.0716859	0	KOG
Z	H2.1	-0.00494495	0	KOG
Z	H2.2	-0.00245862	0	KOG
Z	H2.3	0.0162422	0	KOG
Z	H2.4	-0.0236036	0	KOG
Z	H2.5	-0.0152992	0	KOG
Z	H2.6	-0.00759541	0	KOG
Z	H2.7	0.01757	0	KOG
Z	H2.8	0.01226	0	KOG
Z	H2.9	-0.00428022	0	KOG
Z	M1	-0.0119052	0	KOG
Z	M2	-0.0138104	0	KOG
Z	Ma	-0.0271519	0	KOG
Z	O	-0.00889337	0	KOG
Z	S	-0.0292031	0	KOG
Z	X	0.00985298	0	KOG
