# Supplementary material for: Lifestyles shape genome size and gene content in fungal pathogens
Source: eLife. 2025 Dec 16;14:RP104975. doi: 10.7554/eLife.104975 (PMC12707824; doi:10.7554/eLife.104975)
Supplement: Figure 5—source data 2. [file elife-104975-fig5-data2.xlsx]

## Sheet: Figure5_SourceData2
trait	clade	mean	ci_low	ci_high	sign0	sign1	groups	group
CAZy	X	0.0014986	-0.105319	0.0987915	zero	zero	1	CAZy
CAZy	G	0.270421	0.199908	0.399892	zero	high	1	CAZy
CAZy	H1	0.304906	0.204894	0.381356	zero	high	1	CAZy
CAZy	H2.1	-0.069751	-0.113225	-0.0411435	low	low	1	CAZy
CAZy	H2.2	-0.0624026	-0.0728859	-0.0531853	low	low	1	CAZy
CAZy	H2.5	0.0275243	-0.0327031	0.0913777	zero	zero	1	CAZy
CAZy	H2.6	-0.0572304	-0.104881	-0.000543413	low	low	1	CAZy
CAZy	M1	-0.418382	-0.434034	-0.403276	low	low	1	CAZy
CAZy	D	0.103175	-0.0123287	0.206352	zero	zero	1	CAZy
CAZy	Ma	0.010584	-0.0225664	0.0499791	zero	zero	1	CAZy
CAZy	O	-0.293168	-0.363622	-0.229685	low	low	1	CAZy
CAZy	S	-0.108918	-0.18392	-0.051836	low	low	1	CAZy
AA	X	0.115098	-0.017791	0.257424	zero	zero	1	CAZy
AA	G	0.325448	0.241816	0.43378	zero	high	1	CAZy
AA	H1	0.352354	0.256358	0.459788	zero	high	1	CAZy
AA	H2.1	-0.163449	-0.183694	-0.136107	low	low	1	CAZy
AA	H2.2	-0.0324164	-0.0554369	-0.0143236	low	low	1	CAZy
AA	H2.5	-0.132283	-0.19215	-0.054856	low	low	1	CAZy
AA	H2.6	-0.0865169	-0.168857	-0.0217176	low	low	1	CAZy
AA	M1	-0.560199	-0.589516	-0.537418	low	low	1	CAZy
AA	D	0.24907	0.0156553	0.465214	zero	high	1	CAZy
AA	Ma	0.191198	0.151076	0.244477	zero	high	1	CAZy
AA	O	-0.441014	-0.508868	-0.381248	low	low	1	CAZy
AA	S	-0.03397	-0.173649	0.0834671	zero	zero	1	CAZy
CBM	X	0.0285225	-0.0653779	0.148077	zero	zero	1	CAZy
CBM	G	0.187679	0.0854045	0.292606	zero	high	1	CAZy
CBM	H1	0.268347	0.156072	0.372034	zero	high	1	CAZy
CBM	H2.1	-0.129115	-0.163659	-0.0896767	low	low	1	CAZy
CBM	H2.2	-0.027969	-0.0783706	0.0278327	zero	zero	1	CAZy
CBM	H2.5	0.131725	0.0360374	0.272172	zero	high	1	CAZy
CBM	H2.6	-0.0199264	-0.115274	0.0787035	zero	zero	1	CAZy
CBM	M1	-0.555203	-0.576453	-0.532008	low	low	1	CAZy
CBM	D	0.0162389	-0.175014	0.15524	zero	zero	1	CAZy
CBM	Ma	0.102154	0.034726	0.16417	zero	high	1	CAZy
CBM	O	-0.41404	-0.487105	-0.352403	low	low	1	CAZy
CBM	S	-0.00720448	-0.154401	0.0732514	zero	zero	1	CAZy
CE	X	-0.125488	-0.264923	-0.00838369	low	low	1	CAZy
CE	G	0.429957	0.310333	0.573309	zero	high	1	CAZy
CE	H1	0.809021	0.657119	0.971021	zero	high	1	CAZy
CE	H2.1	-0.18556	-0.241744	-0.145538	low	low	1	CAZy
CE	H2.2	-0.0105832	-0.0712208	0.0436915	zero	zero	1	CAZy
CE	H2.5	0.109048	0.0141792	0.233468	zero	high	1	CAZy
CE	H2.6	-0.0569915	-0.125873	-0.00417779	low	low	1	CAZy
CE	M1	-0.547514	-0.588651	-0.501878	low	low	1	CAZy
CE	D	-0.0450741	-0.198439	0.0724618	zero	zero	1	CAZy
CE	Ma	0.131161	-0.0118265	0.280958	zero	zero	1	CAZy
CE	O	-0.404872	-0.506342	-0.297022	low	low	1	CAZy
CE	S	-0.00438083	-0.081648	0.0853833	zero	zero	1	CAZy
GH	X	0.00564149	-0.110314	0.0952878	zero	zero	1	CAZy
GH	G	0.295944	0.204298	0.398461	zero	high	1	CAZy
GH	H1	0.271893	0.157586	0.366702	zero	high	1	CAZy
GH	H2.1	-0.0427784	-0.107322	0.0168968	zero	zero	1	CAZy
GH	H2.2	-0.11331	-0.122562	-0.105105	low	low	1	CAZy
GH	H2.5	0.0558574	-0.0141084	0.130569	zero	zero	1	CAZy
GH	H2.6	-0.0765143	-0.142	-0.00192541	low	low	1	CAZy
GH	M1	-0.445506	-0.461679	-0.430157	low	low	1	CAZy
GH	D	0.116915	0.0383619	0.21253	zero	high	1	CAZy
GH	Ma	-0.0417617	-0.0709631	-0.014896	low	low	1	CAZy
GH	O	-0.292809	-0.366931	-0.237377	low	low	1	CAZy
GH	S	-0.174329	-0.219961	-0.12267	low	low	1	CAZy
GT	X	-0.0734565	-0.1489	-0.0122372	low	low	1	CAZy
GT	G	0.116141	0.0723057	0.156991	zero	high	1	CAZy
GT	H1	0.17188	0.126949	0.222432	zero	high	1	CAZy
GT	H2.1	-0.0460356	-0.06493	-0.0245083	low	low	1	CAZy
GT	H2.2	-0.0122828	-0.0220446	-0.00332363	low	low	1	CAZy
GT	H2.5	0.0382546	0.00704565	0.0727236	zero	high	1	CAZy
GT	H2.6	0.00120584	-0.0225519	0.0246672	zero	zero	1	CAZy
GT	M1	-0.213804	-0.226753	-0.204524	low	low	1	CAZy
GT	D	0.0557958	0.00454159	0.103839	zero	high	1	CAZy
GT	Ma	-0.00921239	-0.0406425	0.0181257	zero	zero	1	CAZy
GT	O	-0.147603	-0.174725	-0.119904	low	low	1	CAZy
GT	S	-0.0457149	-0.0775785	-0.00627744	low	low	1	CAZy
PL	X	0.0815394	-0.191176	0.321464	zero	zero	1	CAZy
PL	G	0.992459	0.70286	1.21821	zero	high	1	CAZy
PL	H1	0.586156	0.409135	0.744741	zero	high	1	CAZy
PL	H2.1	-0.619345	-0.619345	-0.619345	low	low	1	CAZy
PL	H2.2	-0.619345	-0.619345	-0.619345	low	low	1	CAZy
PL	H2.5	-0.383238	-0.434709	-0.311119	low	low	1	CAZy
PL	H2.6	-0.657119	-0.828943	-0.543763	low	low	1	CAZy
PL	M1	-0.600289	-0.648881	-0.546654	low	low	1	CAZy
PL	D	0.381118	-0.0623377	0.822635	zero	zero	1	CAZy
PL	Ma	-0.244797	-0.348546	-0.149113	low	low	1	CAZy
PL	O	-0.635142	-0.710575	-0.570533	low	low	1	CAZy
PL	S	-0.280396	-0.451374	-0.139834	low	low	1	CAZy
MEROPS	X	0.000412328	-0.0964526	0.0889904	zero	zero	3	other
MEROPS	G	0.173452	0.0988769	0.256372	zero	high	3	other
MEROPS	H1	0.137253	0.0610858	0.229165	zero	high	3	other
MEROPS	H2.1	-0.133498	-0.15471	-0.106061	low	low	3	other
MEROPS	H2.2	-0.132407	-0.143822	-0.117844	low	low	3	other
MEROPS	H2.5	-0.0419353	-0.114654	0.0364923	zero	zero	3	other
MEROPS	H2.6	0.108273	0.0451167	0.165557	zero	high	3	other
MEROPS	M1	-0.313785	-0.337298	-0.294076	low	low	3	other
MEROPS	D	0.124765	-0.00352963	0.213341	zero	zero	3	other
MEROPS	Ma	-0.0208409	-0.0472063	0.00910496	zero	zero	3	other
MEROPS	O	-0.19971	-0.254328	-0.154577	low	low	3	other
MEROPS	S	-0.190271	-0.224297	-0.151962	low	low	3	other
TFs	X	-0.193254	-0.312722	-0.105325	low	low	3	other
TFs	G	0.0890476	0.0129795	0.165975	zero	high	3	other
TFs	H1	0.312365	0.199747	0.408086	zero	high	3	other
TFs	H2.1	-0.117665	-0.142591	-0.0956045	low	low	3	other
TFs	H2.2	-0.0680361	-0.0755835	-0.0581552	low	low	3	other
TFs	H2.5	0.0101299	-0.0498579	0.0714577	zero	zero	3	other
TFs	H2.6	0.0497383	-0.0348393	0.108039	zero	zero	3	other
TFs	M1	-0.299159	-0.325549	-0.272604	low	low	3	other
TFs	D	0.0196146	-0.0726622	0.0844048	zero	zero	3	other
TFs	Ma	-0.100757	-0.125284	-0.0733616	low	low	3	other
TFs	O	-0.06551	-0.133252	-0.00941737	low	low	3	other
TFs	S	-0.161387	-0.201958	-0.119327	low	low	3	other
effectors	X	0.0997341	-0.0834656	0.243164	zero	zero	3	other
effectors	G	0.525922	0.311802	0.742921	zero	high	3	other
effectors	H1	0.471123	0.31818	0.639135	zero	high	3	other
effectors	H2.1	-0.186944	-0.267648	-0.0990468	low	low	3	other
effectors	H2.2	-0.170985	-0.196197	-0.146715	low	low	3	other
effectors	H2.5	-0.16075	-0.260117	-0.0570132	low	low	3	other
effectors	H2.6	0.0506522	-0.0859836	0.18901	zero	zero	3	other
effectors	M1	-0.427846	-0.524884	-0.305065	low	low	3	other
effectors	D	0.145264	-0.0610489	0.266273	zero	zero	3	other
effectors	Ma	0.378713	0.293134	0.513104	zero	high	3	other
effectors	O	-0.556543	-0.637658	-0.482419	low	low	3	other
effectors	S	-0.104837	-0.241889	0.011188	zero	zero	3	other
tRNA	X	0.00872591	-0.132604	0.136273	zero	zero	3	other
tRNA	G	0.663571	0.453947	0.80982	zero	high	3	other
tRNA	H1	0.637104	0.495262	0.752475	zero	high	3	other
tRNA	H2.1	0.0381115	0.0101526	0.0598641	zero	high	3	other
tRNA	H2.2	-0.0273512	-0.0489771	-0.00440966	low	low	3	other
tRNA	H2.5	0.344463	0.278864	0.399772	zero	high	3	other
tRNA	H2.6	-0.20097	-0.254171	-0.171288	low	low	3	other
tRNA	M1	0.401281	0.145226	0.613768	zero	high	3	other
tRNA	D	-0.141427	-0.218762	-0.074339	low	low	3	other
tRNA	Ma	0.0777667	-0.0310492	0.183317	zero	zero	3	other
tRNA	O	0.064618	-0.0634331	0.199952	zero	zero	3	other
tRNA	S	0.318729	0.0327158	0.612519	zero	high	3	other
SMC	X	0.257596	0.113611	0.443306	zero	high	2	SMC
SMC	G	0.463752	0.263472	0.694819	zero	high	2	SMC
SMC	H1	0.068533	-0.125657	0.259226	zero	zero	2	SMC
SMC	H2.1	-0.132296	-0.192247	-0.0719415	low	low	2	SMC
SMC	H2.2	0.149215	0.0848171	0.205329	zero	high	2	SMC
SMC	H2.5	-0.108455	-0.273293	0.0620686	zero	zero	2	SMC
SMC	H2.6	-0.168519	-0.224887	-0.115072	low	low	2	SMC
SMC	M1	-0.665036	-0.684216	-0.647898	low	low	2	SMC
SMC	D	0.706426	0.444317	1.01979	zero	high	2	SMC
SMC	Ma	-0.0079635	-0.153009	0.131008	zero	zero	2	SMC
SMC	O	-0.45805	-0.520867	-0.384498	low	low	2	SMC
SMC	S	-0.247376	-0.370164	-0.102412	low	low	2	SMC
hybrid	X	-0.0505882	-0.26772	0.271451	zero	zero	2	SMC
hybrid	G	0.386818	0.146274	0.710829	zero	high	2	SMC
hybrid	H1	0.148639	-0.368777	0.482229	zero	zero	2	SMC
hybrid	H2.1	-0.327837	-0.949588	0.109069	zero	zero	2	SMC
hybrid	H2.2	0.0292494	-0.294229	0.352728	zero	zero	2	SMC
hybrid	H2.5	0.288824	0.0178495	0.492046	zero	high	2	SMC
hybrid	H2.6	0.690423	0.372096	0.997772	zero	high	2	SMC
hybrid	M1	-1	-1	-1	low	low	2	SMC
hybrid	D	0.754189	0.246148	1.19298	zero	high	2	SMC
hybrid	Ma	0.496408	0.151354	0.840141	zero	high	2	SMC
hybrid	O	-0.616467	-1.13078	-0.36365	low	low	2	SMC
hybrid	S	-0.242086	-0.838105	0.178929	zero	zero	2	SMC
indole	X	0.535968	0.0242348	1.19643	zero	high	2	SMC
indole	G	2.92958	1.62195	4.15026	zero	high	2	SMC
indole	H1	0.501545	-0.257013	1.17261	zero	zero	2	SMC
indole	H2.1	1.3678	0.917919	1.74665	zero	high	2	SMC
indole	H2.2	-0.447513	-0.889503	-0.218231	low	low	2	SMC
indole	H2.5	-0.826044	-1.03044	-0.652088	low	low	2	SMC
indole	H2.6	-0.663685	-0.957961	-0.327369	low	low	2	SMC
indole	M1	-1	-1	-1	low	low	2	SMC
indole	D	0.845066	-0.059726	1.81018	zero	zero	2	SMC
indole	Ma	0.447715	-0.276143	0.930286	zero	zero	2	SMC
indole	O	-0.913827	-1.06894	-0.827653	low	low	2	SMC
indole	S	-0.365818	-1.07927	-0.00116372	low	low	2	SMC
nrps	X	-0.0842497	-0.358884	0.0916015	zero	zero	2	SMC
nrps	G	0.275787	0.0698504	0.467013	zero	high	2	SMC
nrps	H1	0.189461	-0.111739	0.41817	zero	zero	2	SMC
nrps	H2.1	-0.205851	-0.320755	-0.0959114	low	low	2	SMC
nrps	H2.2	0.191223	0.0564659	0.311834	zero	high	2	SMC
nrps	H2.5	-0.229045	-0.407352	-0.077623	low	low	2	SMC
nrps	H2.6	0.0771782	-0.0480751	0.214957	zero	zero	2	SMC
nrps	M1	-0.652452	-0.676985	-0.62383	low	low	2	SMC
nrps	D	0.29966	-0.0562423	0.667737	zero	zero	2	SMC
nrps	Ma	0.0382615	-0.120997	0.19664	zero	zero	2	SMC
nrps	O	-0.622907	-0.721831	-0.526497	low	low	2	SMC
nrps	S	-0.135722	-0.3303	0.00469447	zero	zero	2	SMC
other	X	0.332341	0.0558799	0.560742	zero	high	2	SMC
other	G	0.520834	0.230706	0.799263	zero	high	2	SMC
other	H1	0.272403	0.0476946	0.436555	zero	high	2	SMC
other	H2.1	-0.296848	-0.41404	-0.167937	low	low	2	SMC
other	H2.2	0.162153	0.0322656	0.279394	zero	high	2	SMC
other	H2.5	0.0559181	-0.0845222	0.211119	zero	zero	2	SMC
other	H2.6	0.103482	-0.034913	0.260268	zero	zero	2	SMC
other	M1	-0.548685	-0.610741	-0.48851	low	low	2	SMC
other	D	0.535511	0.237137	0.769766	zero	high	2	SMC
other	Ma	-0.341436	-0.462173	-0.260613	low	low	2	SMC
other	O	-0.104335	-0.266362	0.0529415	zero	zero	2	SMC
other	S	-0.451125	-0.538507	-0.362032	low	low	2	SMC
pks	X	0.511145	0.22695	0.701444	zero	high	2	SMC
pks	G	0.0880955	-0.0227096	0.263652	zero	zero	2	SMC
pks	H1	-0.317051	-0.502665	-0.158205	low	low	2	SMC
pks	H2.1	-0.0831528	-0.194088	0.0536076	zero	zero	2	SMC
pks	H2.2	0.18766	0.0871655	0.279018	zero	high	2	SMC
pks	H2.5	0.125545	-0.0762175	0.350493	zero	zero	2	SMC
pks	H2.6	-0.271815	-0.428077	-0.138008	low	low	2	SMC
pks	M1	-0.642532	-0.711402	-0.583074	low	low	2	SMC
pks	D	0.698306	0.205843	1.05236	zero	high	2	SMC
pks	Ma	-0.0369051	-0.159613	0.0858025	zero	zero	2	SMC
pks	O	-0.470933	-0.580642	-0.388313	low	low	2	SMC
pks	S	-0.354411	-0.474654	-0.26934	low	low	2	SMC
terpene	X	0.333171	0.0620927	0.577248	zero	high	2	SMC
terpene	G	0.477499	0.224902	0.719825	zero	high	2	SMC
terpene	H1	0.218841	0.0399993	0.399808	zero	high	2	SMC
terpene	H2.1	0.151017	0.0226784	0.300649	zero	high	2	SMC
terpene	H2.2	0.179792	0.0128948	0.290865	zero	high	2	SMC
terpene	H2.5	-0.0261506	-0.182878	0.110471	zero	zero	2	SMC
terpene	H2.6	-0.283331	-0.4048	-0.167935	low	low	2	SMC
terpene	M1	-0.506163	-0.588805	-0.431584	low	low	2	SMC
terpene	D	0.403738	0.138159	0.671229	zero	high	2	SMC
terpene	Ma	-0.0842247	-0.233966	0.113781	zero	zero	2	SMC
terpene	O	-0.275159	-0.441342	-0.0948322	low	low	2	SMC
terpene	S	-0.218516	-0.364491	-0.0887597	low	low	2	SMC
A	X	-0.00402842	-0.0300571	0.0207248	zero	zero	0	KOG
A	G	0.0152852	0.00400091	0.0288728	zero	high	0	KOG
A	H1	0.0461971	0.0355822	0.0549665	zero	high	0	KOG
A	H2.1	-0.00887624	-0.016496	-0.000766835	low	low	0	KOG
A	H2.2	-0.00168995	-0.00995126	0.00725026	zero	zero	0	KOG
A	H2.5	0.00895331	-0.00211913	0.0250549	zero	zero	0	KOG
A	H2.6	0.00430088	-0.00235012	0.0114507	zero	zero	0	KOG
A	M1	-0.02472	-0.0369039	-0.0107381	low	low	0	KOG
A	D	0.0207661	0.0109633	0.0307819	zero	high	0	KOG
A	Ma	0.00867984	-0.000344693	0.0171873	zero	zero	0	KOG
A	O	-0.0402478	-0.047014	-0.0285419	low	low	0	KOG
A	S	0.0123317	0.00282936	0.0207913	zero	high	0	KOG
B	X	-0.0854359	-0.118829	-0.0466669	low	low	0	KOG
B	G	0.0195806	-0.0521769	0.0571716	zero	zero	0	KOG
B	H1	0.0715583	0.040629	0.0999586	zero	high	0	KOG
B	H2.1	0.115581	0.0143519	0.193599	zero	high	0	KOG
B	H2.2	-0.0233347	-0.0348249	-0.0131212	low	low	0	KOG
B	H2.5	-0.0125264	-0.0251459	-0.00194179	low	low	0	KOG
B	H2.6	0.0069347	-0.00814902	0.0187093	zero	zero	0	KOG
B	M1	-0.10401	-0.115718	-0.0920574	low	low	0	KOG
B	D	0.0241583	-0.0200833	0.0559399	zero	zero	0	KOG
B	Ma	0.0203428	-0.00524885	0.0380686	zero	zero	0	KOG
B	O	-0.0715044	-0.104746	-0.0403233	low	low	0	KOG
B	S	-0.0171722	-0.0466337	0.0102123	zero	zero	0	KOG
C	X	0.0266027	-0.0754907	0.0939334	zero	zero	0	KOG
C	G	0.162889	0.0863931	0.225772	zero	high	0	KOG
C	H1	0.233306	0.142606	0.336226	zero	high	0	KOG
C	H2.1	-0.0856973	-0.104614	-0.0667807	low	low	0	KOG
C	H2.2	-0.0515423	-0.0624944	-0.0408079	low	low	0	KOG
C	H2.5	0.0805048	0.00310201	0.159104	zero	high	0	KOG
C	H2.6	-0.0793015	-0.151577	-0.0304125	low	low	0	KOG
C	M1	-0.290209	-0.303878	-0.279994	low	low	0	KOG
C	D	0.0755601	-0.00666735	0.129677	zero	zero	0	KOG
C	Ma	-0.128959	-0.146537	-0.107678	low	low	0	KOG
C	O	-0.121022	-0.181176	-0.0574323	low	low	0	KOG
C	S	-0.128913	-0.158828	-0.100333	low	low	0	KOG
D	X	-0.0479325	-0.0736944	-0.0238327	low	low	0	KOG
D	G	0.0105113	-0.0359066	0.0452627	zero	zero	0	KOG
D	H1	0.0495685	0.0178135	0.0715494	zero	high	0	KOG
D	H2.1	-0.0102567	-0.0232723	0.00454175	zero	zero	0	KOG
D	H2.2	0.00412641	-0.00419734	0.0126332	zero	zero	0	KOG
D	H2.5	-0.00364477	-0.0173007	0.00910079	zero	zero	0	KOG
D	H2.6	0.00857854	-0.000314056	0.0182284	zero	zero	0	KOG
D	M1	-0.0177159	-0.0349797	-0.00335445	low	low	0	KOG
D	D	-0.00318701	-0.0244386	0.0124698	zero	zero	0	KOG
D	Ma	0.0181082	0.00207789	0.0340467	zero	high	0	KOG
D	O	-0.0437754	-0.0628606	-0.0236414	low	low	0	KOG
D	S	0.0250132	-0.0332581	0.0586433	zero	zero	0	KOG
E	X	-0.0198326	-0.113948	0.0722509	zero	zero	0	KOG
E	G	0.18179	0.0794144	0.265192	zero	high	0	KOG
E	H1	0.249746	0.154147	0.365813	zero	high	0	KOG
E	H2.1	-0.1103	-0.127818	-0.0912602	low	low	0	KOG
E	H2.2	-0.0820766	-0.0959094	-0.0717452	low	low	0	KOG
E	H2.5	-0.0354133	-0.0835333	0.0197728	zero	zero	0	KOG
E	H2.6	0.0530992	-0.00662907	0.091956	zero	zero	0	KOG
E	M1	-0.229353	-0.248033	-0.213859	low	low	0	KOG
E	D	0.067852	-0.00458781	0.135485	zero	zero	0	KOG
E	Ma	-0.14305	-0.157392	-0.129698	low	low	0	KOG
E	O	-0.0803694	-0.145355	-0.0214736	low	low	0	KOG
E	S	-0.158658	-0.177549	-0.141451	low	low	0	KOG
F	X	-0.0460787	-0.127637	0.0172035	zero	zero	0	KOG
F	G	0.083741	0.00430405	0.129308	zero	high	0	KOG
F	H1	0.0813323	0.0195003	0.142928	zero	high	0	KOG
F	H2.1	-0.054221	-0.0735974	-0.0341833	low	low	0	KOG
F	H2.2	-0.0555568	-0.0747963	-0.0382576	low	low	0	KOG
F	H2.5	0.0198108	-0.0272106	0.061571	zero	zero	0	KOG
F	H2.6	-0.023092	-0.0864632	0.0206791	zero	zero	0	KOG
F	M1	-0.128824	-0.148539	-0.115527	low	low	0	KOG
F	D	-0.0104739	-0.0805585	0.0571522	zero	zero	0	KOG
F	Ma	-0.140997	-0.167662	-0.113056	low	low	0	KOG
F	O	-0.0539162	-0.106276	-0.00589986	low	low	0	KOG
F	S	-0.130599	-0.146376	-0.111728	low	low	0	KOG
G	X	-0.0235394	-0.147935	0.101673	zero	zero	0	KOG
G	G	0.305989	0.159181	0.391172	zero	high	0	KOG
G	H1	0.241442	0.144163	0.369275	zero	high	0	KOG
G	H2.1	-0.144477	-0.164313	-0.123365	low	low	0	KOG
G	H2.2	-0.098518	-0.10975	-0.0850583	low	low	0	KOG
G	H2.5	-0.00242142	-0.0688944	0.0473716	zero	zero	0	KOG
G	H2.6	-0.0592384	-0.126699	-0.00446637	low	low	0	KOG
G	M1	-0.41968	-0.437864	-0.396216	low	low	0	KOG
G	D	0.0541114	-0.0632134	0.171365	zero	zero	0	KOG
G	Ma	-0.13709	-0.155342	-0.113329	low	low	0	KOG
G	O	-0.196787	-0.273342	-0.113517	low	low	0	KOG
G	S	-0.212555	-0.255761	-0.163644	low	low	0	KOG
H	X	-0.0543596	-0.133703	0.0182786	zero	zero	0	KOG
H	G	0.101486	0.052848	0.178796	zero	high	0	KOG
H	H1	0.118802	0.0509492	0.192635	zero	high	0	KOG
H	H2.1	-0.0419609	-0.0655173	-0.0202949	low	low	0	KOG
H	H2.2	-0.0214665	-0.0398809	-0.00769847	low	low	0	KOG
H	H2.5	-0.00739383	-0.0511213	0.0483342	zero	zero	0	KOG
H	H2.6	-0.0154804	-0.0641254	0.0283054	zero	zero	0	KOG
H	M1	-0.160664	-0.178681	-0.144259	low	low	0	KOG
H	D	0.0118632	-0.0344666	0.0574751	zero	zero	0	KOG
H	Ma	-0.102964	-0.140259	-0.0616455	low	low	0	KOG
H	O	-0.0879621	-0.143722	-0.041505	low	low	0	KOG
H	S	-0.0813605	-0.0955125	-0.060269	low	low	0	KOG
I	X	0.0535973	-0.029894	0.13502	zero	zero	0	KOG
I	G	0.143226	0.0744661	0.218392	zero	high	0	KOG
I	H1	0.152102	0.0625937	0.24054	zero	high	0	KOG
I	H2.1	-0.159029	-0.178934	-0.136651	low	low	0	KOG
I	H2.2	-0.0585066	-0.0725023	-0.0453975	low	low	0	KOG
I	H2.5	-0.0133041	-0.0716316	0.0453169	zero	zero	0	KOG
I	H2.6	-0.0337771	-0.0860168	0.0165322	zero	zero	0	KOG
I	M1	-0.275607	-0.301036	-0.251691	low	low	0	KOG
I	D	0.19664	0.0796346	0.284545	zero	high	0	KOG
I	Ma	-0.0791128	-0.115004	-0.0498177	low	low	0	KOG
I	O	-0.183707	-0.234966	-0.144898	low	low	0	KOG
I	S	-0.130519	-0.166227	-0.0951826	low	low	0	KOG
J	X	-0.0106474	-0.0422797	0.0279221	zero	zero	0	KOG
J	G	0.0160852	0.00174847	0.0377246	zero	high	0	KOG
J	H1	0.0515799	0.020991	0.071317	zero	high	0	KOG
J	H2.1	-0.0191284	-0.0289643	-0.00919619	low	low	0	KOG
J	H2.2	-0.0110163	-0.0161471	-0.00642735	low	low	0	KOG
J	H2.5	0.00714588	-0.014178	0.0290793	zero	zero	0	KOG
J	H2.6	0.0115564	-0.00112051	0.0255968	zero	zero	0	KOG
J	M1	-0.0304093	-0.043061	-0.021223	low	low	0	KOG
J	D	0.00331327	-0.0219428	0.0257133	zero	zero	0	KOG
J	Ma	-0.0432089	-0.0495917	-0.0349366	low	low	0	KOG
J	O	-0.0294179	-0.0461122	-0.0121339	low	low	0	KOG
J	S	-0.0196437	-0.0326816	-0.0103983	low	low	0	KOG
K	X	-0.0223379	-0.0502786	0.0156608	zero	zero	0	KOG
K	G	0.0371594	0.0211549	0.0587663	zero	high	0	KOG
K	H1	0.0742753	0.0559523	0.0894068	zero	high	0	KOG
K	H2.1	-0.02589	-0.0323038	-0.0194095	low	low	0	KOG
K	H2.2	-0.00821375	-0.0199819	0.0017156	zero	zero	0	KOG
K	H2.5	0.00809864	-0.00387767	0.0197653	zero	zero	0	KOG
K	H2.6	-0.02536	-0.0385191	-0.0142254	low	low	0	KOG
K	M1	-0.034612	-0.0529704	-0.0231296	low	low	0	KOG
K	D	0.0239783	0.0041345	0.0405829	zero	high	0	KOG
K	Ma	-0.00531847	-0.0144062	0.00720139	zero	zero	0	KOG
K	O	-0.0290425	-0.0407647	-0.0134153	low	low	0	KOG
K	S	0.00757338	-0.00788647	0.0207845	zero	zero	0	KOG
L	X	-0.0413617	-0.0827617	-0.00128622	low	low	0	KOG
L	G	0.0170855	-0.00695709	0.0417006	zero	zero	0	KOG
L	H1	0.0943782	0.0356479	0.175126	zero	high	0	KOG
L	H2.1	-0.0141215	-0.0359556	-0.000744362	low	low	0	KOG
L	H2.2	-0.0315302	-0.0399871	-0.0234672	low	low	0	KOG
L	H2.5	-0.0393582	-0.0709517	-0.0170972	low	low	0	KOG
L	H2.6	-0.0362864	-0.0641754	-0.00584138	low	low	0	KOG
L	M1	-0.0631535	-0.0876981	-0.0426532	low	low	0	KOG
L	D	0.0424305	0.0283	0.0596361	zero	high	0	KOG
L	Ma	0.0295493	-0.00784796	0.061865	zero	zero	0	KOG
L	O	-0.0836268	-0.108405	-0.0692075	low	low	0	KOG
L	S	0.00565994	-0.0308124	0.0303023	zero	zero	0	KOG
M	X	-0.0452974	-0.106384	0.00280091	zero	zero	0	KOG
M	G	0.228151	0.183134	0.284074	zero	high	0	KOG
M	H1	0.151186	0.0814005	0.203743	zero	high	0	KOG
M	H2.1	-0.0979341	-0.121243	-0.0805058	low	low	0	KOG
M	H2.2	-0.0221781	-0.0338261	-0.0117561	low	low	0	KOG
M	H2.5	-0.0165118	-0.0574835	0.0249855	zero	zero	0	KOG
M	H2.6	-0.0772417	-0.105773	-0.0460935	low	low	0	KOG
M	M1	-0.20811	-0.219846	-0.195677	low	low	0	KOG
M	D	0.112709	0.0067223	0.191609	zero	high	0	KOG
M	Ma	0.0410435	0.00280855	0.065973	zero	high	0	KOG
M	O	-0.225414	-0.260854	-0.193522	low	low	0	KOG
M	S	-0.0700541	-0.12725	-0.0302024	low	low	0	KOG
N	X	-0.055336	-0.168696	0.0580236	zero	zero	0	KOG
N	G	0.0915361	0.0273281	0.181427	zero	high	0	KOG
N	H1	0.0210756	-0.0373234	0.0671419	zero	zero	0	KOG
N	H2.1	-0.120248	-0.251381	-0.00737472	low	low	0	KOG
N	H2.2	0.0457424	-0.0239738	0.115459	zero	zero	0	KOG
N	H2.5	-0.080454	-0.178458	-0.00301853	low	low	0	KOG
N	H2.6	0.00585428	-0.0409296	0.0643342	zero	zero	0	KOG
N	M1	0.0987538	0.0236723	0.208629	zero	high	0	KOG
N	D	0.0533872	0.0182743	0.0885001	zero	high	0	KOG
N	Ma	-0.0271823	-0.0966693	0.0423046	zero	zero	0	KOG
N	O	0.141572	0.0653842	0.240839	zero	high	0	KOG
N	S	0.00699383	-0.034108	0.0707016	zero	zero	0	KOG
O	X	-0.0134293	-0.0449567	0.0318876	zero	zero	0	KOG
O	G	0.0577886	0.0299325	0.0901922	zero	high	0	KOG
O	H1	0.0799678	0.0584888	0.110465	zero	high	0	KOG
O	H2.1	-0.0577483	-0.0664433	-0.0445499	low	low	0	KOG
O	H2.2	-0.028656	-0.035803	-0.0225324	low	low	0	KOG
O	H2.5	-0.0294107	-0.051044	-0.00617124	low	low	0	KOG
O	H2.6	0.0455424	0.0208081	0.0717235	zero	high	0	KOG
O	M1	-0.123933	-0.141818	-0.103698	low	low	0	KOG
O	D	0.0258328	-0.0159241	0.060031	zero	zero	0	KOG
O	Ma	0.0128973	-0.00477894	0.030914	zero	zero	0	KOG
O	O	-0.108816	-0.137178	-0.0869482	low	low	0	KOG
O	S	-0.0429614	-0.0618512	-0.0252805	low	low	0	KOG
P	X	-0.0423782	-0.0910544	0.00889089	zero	zero	0	KOG
P	G	0.177419	0.13051	0.217625	zero	high	0	KOG
P	H1	0.161016	0.115323	0.20363	zero	high	0	KOG
P	H2.1	-0.0836032	-0.106033	-0.0638589	low	low	0	KOG
P	H2.2	-0.0455933	-0.0601543	-0.0283849	low	low	0	KOG
P	H2.5	-0.0848966	-0.109636	-0.0531883	low	low	0	KOG
P	H2.6	0.0188214	-0.0150943	0.045204	zero	zero	0	KOG
P	M1	-0.192058	-0.21382	-0.174074	low	low	0	KOG
P	D	-0.0211981	-0.0933999	0.0546718	zero	zero	0	KOG
P	Ma	0.0697755	0.0425732	0.0908046	zero	high	0	KOG
P	O	-0.14898	-0.190683	-0.109958	low	low	0	KOG
P	S	-0.0535429	-0.102024	-0.0219711	low	low	0	KOG
Q	X	0.142411	-0.0631203	0.311677	zero	zero	0	KOG
Q	G	0.356898	0.179062	0.520032	zero	high	0	KOG
Q	H1	0.318973	0.139803	0.488614	zero	high	0	KOG
Q	H2.1	-0.286229	-0.312593	-0.26339	low	low	0	KOG
Q	H2.2	-0.15622	-0.177207	-0.137382	low	low	0	KOG
Q	H2.5	0.0173441	-0.0944459	0.124695	zero	zero	0	KOG
Q	H2.6	-0.086293	-0.202514	0.0291228	zero	zero	0	KOG
Q	M1	-0.61892	-0.639893	-0.593685	low	low	0	KOG
Q	D	0.347927	0.130657	0.565723	zero	high	0	KOG
Q	Ma	-0.179	-0.23185	-0.11695	low	low	0	KOG
Q	O	-0.289897	-0.41069	-0.199125	low	low	0	KOG
Q	S	-0.289397	-0.376897	-0.22721	low	low	0	KOG
R	X	-0.0451081	-0.154465	0.0405343	zero	zero	0	KOG
R	G	0.159795	0.102055	0.253888	zero	high	0	KOG
R	H1	0.213975	0.119195	0.322325	zero	high	0	KOG
R	H2.1	-0.085587	-0.111892	-0.0596101	low	low	0	KOG
R	H2.2	-0.0946041	-0.104086	-0.0881829	low	low	0	KOG
R	H2.5	0.0125188	-0.0495777	0.0878126	zero	zero	0	KOG
R	H2.6	-0.053404	-0.116895	-0.00587986	low	low	0	KOG
R	M1	-0.292222	-0.388792	-0.242003	low	low	0	KOG
R	D	0.100676	0.00437833	0.186337	zero	high	0	KOG
R	Ma	-0.0946189	-0.150586	-0.0299375	low	low	0	KOG
R	O	-0.162179	-0.23738	-0.103254	low	low	0	KOG
R	S	-0.176339	-0.216482	-0.137538	low	low	0	KOG
S	X	-0.0671252	-0.119436	-0.0311073	low	low	0	KOG
S	G	0.0657553	0.0374356	0.0979499	zero	high	0	KOG
S	H1	0.0948559	0.0759025	0.116032	zero	high	0	KOG
S	H2.1	-0.0116815	-0.027028	0.0107936	zero	zero	0	KOG
S	H2.2	-0.018513	-0.0250005	-0.0125405	low	low	0	KOG
S	H2.5	-0.00996024	-0.0272449	0.0100714	zero	zero	0	KOG
S	H2.6	-0.0139676	-0.0334699	0.00384634	zero	zero	0	KOG
S	M1	-0.063407	-0.0760376	-0.0492156	low	low	0	KOG
S	D	0.0286621	0.00553338	0.0586751	zero	high	0	KOG
S	Ma	0.0390812	0.0267071	0.0556487	zero	high	0	KOG
S	O	-0.0558197	-0.0837286	-0.0364835	low	low	0	KOG
S	S	-0.0160752	-0.032854	-0.00148483	low	low	0	KOG
T	X	-0.0357046	-0.0998506	0.0246509	zero	zero	0	KOG
T	G	0.0640172	0.0335854	0.0949841	zero	high	0	KOG
T	H1	0.110298	0.0494583	0.160505	zero	high	0	KOG
T	H2.1	-0.0284063	-0.0947937	0.00676293	zero	zero	0	KOG
T	H2.2	-0.00556127	-0.0243539	0.0145181	zero	zero	0	KOG
T	H2.5	-0.0182876	-0.0469531	0.0135952	zero	zero	0	KOG
T	H2.6	0.0425857	0.0189346	0.0635049	zero	high	0	KOG
T	M1	-0.124912	-0.135438	-0.112375	low	low	0	KOG
T	D	0.0665876	0.0215785	0.111923	zero	high	0	KOG
T	Ma	-0.0284188	-0.038874	-0.0159275	low	low	0	KOG
T	O	-0.0530921	-0.0925239	-0.0167815	low	low	0	KOG
T	S	-0.0478339	-0.0741417	-0.0261087	low	low	0	KOG
U	X	0.00835733	-0.00919451	0.026681	zero	zero	0	KOG
U	G	0.0180367	0.00354154	0.0369025	zero	high	0	KOG
U	H1	0.0376826	0.0271114	0.0470665	zero	high	0	KOG
U	H2.1	-0.0275856	-0.036401	-0.0200027	low	low	0	KOG
U	H2.2	0.0033862	-0.00228304	0.00918242	zero	zero	0	KOG
U	H2.5	-0.00269092	-0.00970456	0.00695997	zero	zero	0	KOG
U	H2.6	0.0133601	-0.000392153	0.0275844	zero	zero	0	KOG
U	M1	-0.0182081	-0.0324489	-0.00842079	low	low	0	KOG
U	D	0.00778995	-0.000412891	0.0184226	zero	zero	0	KOG
U	Ma	0.0023033	-0.00247658	0.00787369	zero	zero	0	KOG
U	O	-0.0336071	-0.0463902	-0.0213326	low	low	0	KOG
U	S	0.00506009	-0.00494934	0.0124166	zero	zero	0	KOG
V	X	0.0202615	-0.0804583	0.113054	zero	zero	0	KOG
V	G	0.193085	0.0646563	0.316702	zero	high	0	KOG
V	H1	0.291907	0.145264	0.474166	zero	high	0	KOG
V	H2.1	-0.0742233	-0.118722	-0.0292132	low	low	0	KOG
V	H2.2	-0.173535	-0.206534	-0.127588	low	low	0	KOG
V	H2.5	0.199465	0.0398249	0.415349	zero	high	0	KOG
V	H2.6	-0.113952	-0.218656	-0.0210887	low	low	0	KOG
V	M1	-0.365449	-0.395955	-0.34321	low	low	0	KOG
V	D	-0.00378925	-0.111706	0.0983259	zero	zero	0	KOG
V	Ma	-0.122571	-0.159862	-0.0896677	low	low	0	KOG
V	O	-0.231205	-0.3292	-0.150863	low	low	0	KOG
V	S	-0.180154	-0.223335	-0.141372	low	low	0	KOG
W	X	-0.132656	-0.340065	-0.0283865	low	low	0	KOG
W	G	0.474291	0.340992	0.579591	zero	high	0	KOG
W	H1	0.13751	0.0616757	0.235011	zero	high	0	KOG
W	H2.1	-0.168719	-0.280111	-0.0706277	low	low	0	KOG
W	H2.2	-0.09806	-0.173707	-0.0323056	low	low	0	KOG
W	H2.5	-0.279129	-0.359997	-0.158728	low	low	0	KOG
W	H2.6	0.171288	0.0738039	0.276185	zero	high	0	KOG
W	M1	-0.180755	-0.213525	-0.160274	low	low	0	KOG
W	D	-0.0976974	-0.184038	-0.0152456	low	low	0	KOG
W	Ma	0.106092	-0.0413868	0.228991	zero	zero	0	KOG
W	O	-0.151411	-0.261435	-0.0402164	low	low	0	KOG
W	S	-0.0765296	-0.143304	0.00161022	zero	zero	0	KOG
Y	X	0.0246864	-0.00210409	0.0538137	zero	zero	0	KOG
Y	G	0.0207853	-0.00180415	0.048063	zero	zero	0	KOG
Y	H1	0.0196217	-0.0103115	0.0393053	zero	zero	0	KOG
Y	H2.1	0.015307	-0.00542818	0.0358634	zero	zero	0	KOG
Y	H2.2	0.0103913	0.00350939	0.0149584	zero	high	0	KOG
Y	H2.5	0.0135279	0.00570139	0.0246154	zero	high	0	KOG
Y	H2.6	-0.0139517	-0.0227783	-0.0038643	low	low	0	KOG
Y	M1	-0.0484155	-0.0782062	-0.0318405	low	low	0	KOG
Y	D	0.0457611	0.034129	0.0638861	zero	high	0	KOG
Y	Ma	-0.0128608	-0.0239522	-0.00158448	low	low	0	KOG
Y	O	-0.0228959	-0.0366282	-0.0107481	low	low	0	KOG
Y	S	0.0116691	0.00154158	0.0274494	zero	high	0	KOG
Z	X	0.00985298	-0.0249761	0.0392697	zero	zero	0	KOG
Z	G	0.0306574	0.0119337	0.0504915	zero	high	0	KOG
Z	H1	0.0716859	0.0496538	0.0921469	zero	high	0	KOG
Z	H2.1	-0.00494495	-0.0179288	0.0107608	zero	zero	0	KOG
Z	H2.2	-0.00245862	-0.0140004	0.00913814	zero	zero	0	KOG
Z	H2.5	-0.0152992	-0.0328794	-0.00212642	low	low	0	KOG
Z	H2.6	-0.00759541	-0.0197195	0.00607825	zero	zero	0	KOG
Z	M1	-0.0119052	-0.0283128	0.00746472	zero	zero	0	KOG
Z	D	-0.0299	-0.0422457	-0.0187559	low	low	0	KOG
Z	Ma	-0.0271519	-0.0363807	-0.0189428	low	low	0	KOG
Z	O	-0.00889337	-0.0264793	0.00635685	zero	zero	0	KOG
Z	S	-0.0292031	-0.0357112	-0.0213692	low	low	0	KOG
