# Supplementary material for: Lifestyles shape genome size and gene content in fungal pathogens
Source: eLife. 2025 Dec 16;14:RP104975. doi: 10.7554/eLife.104975 (PMC12707824; doi:10.7554/eLife.104975)
Supplement: Figure 5—source data 3. [file elife-104975-fig5-data3.xlsx]

## Sheet: Figure5_SourceData3
clade	change	trait
C	0.0407899	CAZy
D	0.14616	CAZy
G	0.253649	CAZy
H1	0.316312	CAZy
H2.1	-0.2903	CAZy
H2.3	0.120557	CAZy
H2.4	-0.211564	CAZy
H2.5	0.0414174	CAZy
H2.6	-0.0441143	CAZy
H2.7	0.499305	CAZy
H2.8	-0.355293	CAZy
H2.9	-0.0202594	CAZy
M1	-0.44892	CAZy
M2	-0.022771	CAZy
Ma	0.0548727	CAZy
O	-0.26085	CAZy
X	0.0618124	CAZy
C	0.00810323	AA
D	0.347004	AA
G	0.343121	AA
H1	0.364675	AA
H2.1	-0.346731	AA
H2.3	0.212208	AA
H2.4	-0.140246	AA
H2.5	-0.114787	AA
H2.6	-0.0633315	AA
H2.7	0.922474	AA
H2.8	-0.452126	AA
H2.9	-0.0412206	AA
M1	-0.586849	AA
M2	0.179046	AA
Ma	0.227241	AA
O	-0.412047	AA
X	0.19251	AA
C	0.103604	CBM
D	0.0855044	CBM
G	0.196263	CBM
H1	0.258923	CBM
H2.1	-0.387981	CBM
H2.3	0.140527	CBM
H2.4	-0.361911	CBM
H2.5	0.139661	CBM
H2.6	-0.0191253	CBM
H2.7	0.766921	CBM
H2.8	-0.541603	CBM
H2.9	0.114738	CBM
M1	-0.567885	CBM
M2	0.183845	CBM
Ma	0.168066	CBM
O	-0.351882	CBM
X	0.100875	CBM
C	0.04451	CE
D	-0.0357884	CE
G	0.394864	CE
H1	0.796963	CE
H2.1	-0.412776	CE
H2.3	0.0439536	CE
H2.4	-0.371597	CE
H2.5	0.0972308	CE
H2.6	-0.0594092	CE
H2.7	0.606134	CE
H2.8	-0.615259	CE
H2.9	-0.0720943	CE
M1	-0.587907	CE
M2	0.13718	CE
Ma	0.21587	CE
O	-0.374103	CE
X	-0.0929822	CE
C	0.0625242	GH
D	0.157297	GH
G	0.27693	GH
H1	0.29972	GH
H2.1	-0.317606	GH
H2.3	0.102241	GH
H2.4	-0.275846	GH
H2.5	0.0813171	GH
H2.6	-0.0537116	GH
H2.7	0.494601	GH
H2.8	-0.362964	GH
H2.9	0.0151969	GH
M1	-0.475562	GH
M2	-0.0872385	GH
Ma	0.00405844	GH
O	-0.258586	GH
X	0.0784241	GH
C	0.0150009	GT
D	0.0708255	GT
G	0.0998769	GT
H1	0.172868	GT
H2.1	-0.174086	GT
H2.3	0.123755	GT
H2.4	-0.0928638	GT
H2.5	0.0412845	GT
H2.6	0.00234537	GT
H2.7	0.0942017	GT
H2.8	-0.195449	GT
H2.9	-0.0166594	GT
M1	-0.23897	GT
M2	-0.0388202	GT
Ma	0.0176553	GT
O	-0.124294	GT
X	-0.00670261	GT
C	-0.0754512	PL
D	0.446664	PL
G	0.76972	PL
H1	0.462504	PL
H2.1	-0.825359	PL
H2.3	0.0696781	PL
H2.4	-0.644637	PL
H2.5	-0.399383	PL
H2.6	-0.668601	PL
H2.7	2.48082	PL
H2.8	-0.644663	PL
H2.9	-0.543138	PL
M1	-0.650656	PL
M2	-0.428434	PL
Ma	-0.361933	PL
O	-0.648806	PL
X	0.0422399	PL
C	0.0378659	MEROPS
D	0.172098	MEROPS
G	0.190821	MEROPS
H1	0.148629	MEROPS
H2.1	-0.347583	MEROPS
H2.3	0.163302	MEROPS
H2.4	-0.162879	MEROPS
H2.5	-0.0222962	MEROPS
H2.6	0.126003	MEROPS
H2.7	0.353214	MEROPS
H2.8	-0.32743	MEROPS
H2.9	-0.0440919	MEROPS
M1	-0.336505	MEROPS
M2	-0.0699388	MEROPS
Ma	0.00251831	MEROPS
O	-0.177958	MEROPS
X	0.0825904	MEROPS
C	0.0692059	TFs
D	0.07815	TFs
G	0.0570065	TFs
H1	0.368213	TFs
H2.1	-0.306374	TFs
H2.3	0.100787	TFs
H2.4	-0.221858	TFs
H2.5	0.0344967	TFs
H2.6	0.0705191	TFs
H2.7	0.246531	TFs
H2.8	-0.291789	TFs
H2.9	0.000488433	TFs
M1	-0.340503	TFs
M2	0.0237354	TFs
Ma	-0.0456844	TFs
O	-0.0013523	TFs
X	-0.00497035	TFs
C	0.0697975	effectors
D	0.19859	effectors
G	0.458677	effectors
H1	0.365883	effectors
H2.1	-0.519805	effectors
H2.3	0.210658	effectors
H2.4	-0.0420645	effectors
H2.5	-0.155076	effectors
H2.6	0.0296892	effectors
H2.7	0.474454	effectors
H2.8	-0.708495	effectors
H2.9	-0.115659	effectors
M1	-0.444259	effectors
M2	-0.00587413	effectors
Ma	0.482655	effectors
O	-0.512495	effectors
X	0.23158	effectors
C	0.354084	tRNA
D	-0.17908	tRNA
G	0.48114	tRNA
H1	0.493525	tRNA
H2.1	-0.00185782	tRNA
H2.3	0.188963	tRNA
H2.4	-0.163506	tRNA
H2.5	0.281207	tRNA
H2.6	-0.249497	tRNA
H2.7	0.18746	tRNA
H2.8	-0.113501	tRNA
H2.9	-0.335126	tRNA
M1	0.207343	tRNA
M2	0.0580337	tRNA
Ma	0.0393373	tRNA
O	-0.080812	tRNA
X	0.0201546	tRNA
C	-0.187452	SMC
D	0.747739	SMC
G	0.431192	SMC
H1	0.0470661	SMC
H2.1	-0.464562	SMC
H2.3	0.282821	SMC
H2.4	0.105714	SMC
H2.5	-0.0418793	SMC
H2.6	-0.15703	SMC
H2.7	0.451236	SMC
H2.8	-0.664736	SMC
H2.9	-0.0660504	SMC
M1	-0.695331	SMC
M2	-0.14968	SMC
Ma	0.052261	SMC
O	-0.414245	SMC
X	0.390081	SMC
C	-0.0766806	hybrid
D	0.53493	hybrid
G	0.29404	hybrid
H1	0.0614488	hybrid
H2.1	-0.856763	hybrid
H2.3	0.257796	hybrid
H2.4	-0.52022	hybrid
H2.5	0.199268	hybrid
H2.6	0.485989	hybrid
H2.7	0.00934711	hybrid
H2.8	-0.308456	hybrid
H2.9	0.383088	hybrid
M1	-1	hybrid
M2	0.256839	hybrid
Ma	0.474467	hybrid
O	-0.615907	hybrid
X	0.032251	hybrid
C	-1	indole
D	0.836461	indole
G	2.01323	indole
H1	0.441293	indole
H2.1	0.0436929	indole
H2.3	1.15262	indole
H2.4	0.400969	indole
H2.5	-0.723555	indole
H2.6	-0.612977	indole
H2.7	-1	indole
H2.8	-1	indole
H2.9	-1	indole
M1	-1	indole
M2	-0.82112	indole
Ma	0.0748363	indole
O	-1	indole
X	0.315382	indole
C	-0.180462	nrps
D	0.430064	nrps
G	0.21581	nrps
H1	0.0984161	nrps
H2.1	-0.560461	nrps
H2.3	0.303633	nrps
H2.4	-0.0442409	nrps
H2.5	-0.20225	nrps
H2.6	0.0554851	nrps
H2.7	0.181641	nrps
H2.8	-0.797686	nrps
H2.9	-0.393058	nrps
M1	-0.699798	nrps
M2	0.0826738	nrps
Ma	0.0921278	nrps
O	-0.6222	nrps
X	0.168034	nrps
C	-0.427104	other
D	0.481864	other
G	0.349651	other
H1	0.192009	other
H2.1	-0.583084	other
H2.3	0.250749	other
H2.4	0.365591	other
H2.5	0.0984347	other
H2.6	0.102811	other
H2.7	0.0834103	other
H2.8	-0.444925	other
H2.9	-0.0748755	other
M1	-0.6085	other
M2	-0.173501	other
Ma	-0.276707	other
O	0.0252679	other
X	0.520215	other
C	-0.190161	pks
D	0.739197	pks
G	0.134641	pks
H1	-0.261062	pks
H2.1	-0.298903	pks
H2.3	0.410743	pks
H2.4	0.0687678	pks
H2.5	0.258291	pks
H2.6	-0.224772	pks
H2.7	0.42393	pks
H2.8	-0.50625	pks
H2.9	-0.547396	pks
M1	-0.654318	pks
M2	-0.356887	pks
Ma	-0.0099946	pks
O	-0.437694	pks
X	0.429836	pks
C	0.111885	terpene
D	0.347353	terpene
G	0.451644	terpene
H1	0.207094	terpene
H2.1	-0.354642	terpene
H2.3	-0.0588523	terpene
H2.4	0.0710774	terpene
H2.5	0.0259271	terpene
H2.6	-0.281851	terpene
H2.7	0.41545	terpene
H2.8	-0.484031	terpene
H2.9	0.547907	terpene
M1	-0.544013	terpene
M2	-0.1978	terpene
Ma	-0.0912083	terpene
O	-0.278436	terpene
X	0.50767	terpene
C	0.0330924	A
D	0.0301317	A
G	0.000136656	A
H1	0.0443409	A
H2.1	-0.0408284	A
H2.3	0.0160922	A
H2.4	-0.0250792	A
H2.5	0.0104268	A
H2.6	0.00373434	A
H2.7	0.0255755	A
H2.8	-0.0361465	A
H2.9	-0.0172474	A
M1	-0.0409458	A
M2	-0.00403627	A
Ma	0.0244294	A
O	-0.0361135	A
X	0.0202994	A
C	0.00975342	B
D	0.0359769	B
G	-0.0103808	B
H1	0.0666815	B
H2.1	-0.0577297	B
H2.3	-0.000123696	B
H2.4	-0.0274235	B
H2.5	-0.0104837	B
H2.6	0.00691691	B
H2.7	-0.0147328	B
H2.8	-0.0546944	B
H2.9	-0.0786262	B
M1	-0.129919	B
M2	0.0341805	B
Ma	0.0135776	B
O	-0.0599627	B
X	-0.0929893	B
C	0.0405255	C
D	0.103477	C
G	0.13373	C
H1	0.258938	C
H2.1	-0.253673	C
H2.3	0.145638	C
H2.4	-0.178254	C
H2.5	0.089797	C
H2.6	-0.0693654	C
H2.7	0.307627	C
H2.8	-0.22277	C
H2.9	0.00197065	C
M1	-0.328582	C
M2	0.0404477	C
Ma	-0.0937888	C
O	-0.0890171	C
X	0.0684841	C
C	-0.0410449	D
D	-0.0118334	D
G	-0.0154521	D
H1	0.0383913	D
H2.1	-0.10052	D
H2.3	0.0524819	D
H2.4	0.0369918	D
H2.5	-0.00818652	D
H2.6	0.00215576	D
H2.7	-0.00301738	D
H2.8	-0.0391248	D
H2.9	-0.00263591	D
M1	-0.0416172	D
M2	-0.0017659	D
Ma	0.004621	D
O	-0.0633641	D
X	-0.0491865	D
C	0.0107085	E
D	0.103296	E
G	0.15624	E
H1	0.279896	E
H2.1	-0.266296	E
H2.3	0.135059	E
H2.4	-0.174405	E
H2.5	-0.0295561	E
H2.6	0.0601896	E
H2.7	0.230236	E
H2.8	-0.201588	E
H2.9	-0.0818266	E
M1	-0.268191	E
M2	-0.00261087	E
Ma	-0.121759	E
O	-0.084695	E
X	0.0532097	E
C	0.0391635	F
D	0.0246767	F
G	0.0841596	F
H1	0.12867	F
H2.1	-0.118924	F
H2.3	0.0589027	F
H2.4	-0.108724	F
H2.5	0.0381988	F
H2.6	-0.00713102	F
H2.7	0.0955202	F
H2.8	-0.0209488	F
H2.9	-0.0209488	F
M1	-0.147136	F
M2	-0.0843598	F
Ma	-0.128919	F
O	-0.060549	F
X	0.0195589	F
C	0.0181158	G
D	0.114841	G
G	0.283252	G
H1	0.283057	G
H2.1	-0.333153	G
H2.3	0.0563441	G
H2.4	-0.246543	G
H2.5	0.0252206	G
H2.6	-0.0327042	G
H2.7	0.424803	G
H2.8	-0.257954	G
H2.9	-0.0285424	G
M1	-0.459502	G
M2	0.00663419	G
Ma	-0.0937365	G
O	-0.169492	G
X	0.0847067	G
C	0.0349238	H
D	0.0409009	H
G	0.0871968	H
H1	0.145283	H
H2.1	-0.215886	H
H2.3	0.0976651	H
H2.4	-0.0482664	H
H2.5	0.00941006	H
H2.6	-0.00522791	H
H2.7	0.195238	H
H2.8	-0.1598	H
H2.9	-0.0249531	H
M1	-0.191455	H
M2	0.0323584	H
Ma	-0.0602544	H
O	-0.0757347	H
X	0.027239	H
C	-0.0136421	I
D	0.257034	I
G	0.125286	I
H1	0.153039	I
H2.1	-0.29438	I
H2.3	0.156125	I
H2.4	-0.0904086	I
H2.5	0.00505252	I
H2.6	-0.0254674	I
H2.7	0.283326	I
H2.8	-0.27953	I
H2.9	0.0385997	I
M1	-0.300648	I
M2	0.0106443	I
Ma	-0.0192492	I
O	-0.149706	I
X	0.148408	I
C	0.0338329	J
D	0.0239793	J
G	0.00825579	J
H1	0.0624661	J
H2.1	-0.0678897	J
H2.3	0.0264376	J
H2.4	-0.0537351	J
H2.5	0.0171281	J
H2.6	0.0183109	J
H2.7	0.0330443	J
H2.8	-0.026001	J
H2.9	0.00321901	J
M1	-0.0412861	J
M2	-0.0096856	J
Ma	-0.0219282	J
O	-0.017913	J
X	0.0203918	J
C	0.0255239	K
D	0.0305356	K
G	0.0162301	K
H1	0.0721963	K
H2.1	-0.0523301	K
H2.3	0.0232384	K
H2.4	-0.0253707	K
H2.5	0.0111328	K
H2.6	-0.023634	K
H2.7	0.0334459	K
H2.8	-0.0625988	K
H2.9	0.0105013	K
M1	-0.0561319	K
M2	0.0191473	K
Ma	-0.00535431	K
O	-0.0191212	K
X	0.000941234	K
C	-0.0151126	L
D	0.0312189	L
G	-0.0171161	L
H1	0.0546977	L
H2.1	-0.164606	L
H2.3	0.059669	L
H2.4	0.022413	L
H2.5	-0.0380209	L
H2.6	-0.0393663	L
H2.7	-0.00489386	L
H2.8	-0.111028	L
H2.9	-0.0335013	L
M1	-0.101956	L
M2	-0.014709	L
Ma	0.00199174	L
O	-0.0953041	L
X	-0.017419	L
C	0.0383266	M
D	0.123822	M
G	0.198207	M
H1	0.14468	M
H2.1	-0.145236	M
H2.3	0.0550114	M
H2.4	-0.177671	M
H2.5	-0.0151116	M
H2.6	-0.0767034	M
H2.7	0.433635	M
H2.8	-0.260614	M
H2.9	0.0742024	M
M1	-0.241983	M
M2	-0.0369415	M
Ma	0.0336818	M
O	-0.214297	M
X	-0.014169	M
C	0.0183176	N
D	0.0249867	N
G	0.00372034	N
H1	0.0150073	N
H2.1	0.152044	N
H2.3	-0.135967	N
H2.4	0.0448309	N
H2.5	-0.0576817	N
H2.6	0.0129922	N
H2.7	0.0412277	N
H2.8	0.0288119	N
H2.9	0.0288119	N
M1	0.0695093	N
M2	0.0332547	N
Ma	-0.0271209	N
O	0.127932	N
X	-0.00239285	N
C	0.0467915	O
D	0.0497015	O
G	0.0630807	O
H1	0.0853264	O
H2.1	-0.132931	O
H2.3	0.065944	O
H2.4	-0.0699471	O
H2.5	-0.0194794	O
H2.6	0.0515885	O
H2.7	0.130859	O
H2.8	-0.12735	O
H2.9	-0.00543547	O
M1	-0.139607	O
M2	-0.0142368	O
Ma	0.0205632	O
O	-0.0912597	O
X	0.0381401	O
C	0.00164093	P
D	0.0231029	P
G	0.162539	P
H1	0.170029	P
H2.1	-0.213442	P
H2.3	0.108331	P
H2.4	-0.0769981	P
H2.5	-0.0728412	P
H2.6	0.0305814	P
H2.7	0.125251	P
H2.8	-0.175466	P
H2.9	0.123185	P
M1	-0.223845	P
M2	0.0216115	P
Ma	0.0902013	P
O	-0.129859	P
X	0.0232582	P
C	0.00241135	Q
D	0.438872	Q
G	0.33164	Q
H1	0.36023	Q
H2.1	-0.518042	Q
H2.3	0.19025	Q
H2.4	-0.170218	Q
H2.5	0.0519028	Q
H2.6	-0.0583986	Q
H2.7	0.668023	Q
H2.8	-0.492831	Q
H2.9	-0.0809307	Q
M1	-0.655686	Q
M2	0.0220076	Q
Ma	-0.13072	Q
O	-0.267323	Q
X	0.255832	Q
C	0.0152618	R
D	0.137058	R
G	0.138414	R
H1	0.254318	R
H2.1	-0.297407	R
H2.3	0.137996	R
H2.4	-0.160456	R
H2.5	0.0331421	R
H2.6	-0.035294	R
H2.7	0.32203	R
H2.8	-0.26843	R
H2.9	-0.0160594	R
M1	-0.338293	R
M2	-0.0201846	R
Ma	-0.0468418	R
O	-0.137743	R
X	0.0358184	R
C	0.0523058	S
D	0.042404	S
G	0.0435736	S
H1	0.09146	S
H2.1	-0.0992414	S
H2.3	0.0546956	S
H2.4	-0.0607018	S
H2.5	-0.00944603	S
H2.6	-0.014421	S
H2.7	0.115964	S
H2.8	-0.0673123	S
H2.9	0.00953841	S
M1	-0.0868027	S
M2	0.0142673	S
Ma	0.0565664	S
O	-0.04358	S
X	-0.0112189	S
C	-0.000425071	T
D	0.0899455	T
G	0.0481664	T
H1	0.117672	T
H2.1	-0.166929	T
H2.3	0.0885638	T
H2.4	-0.0753388	T
H2.5	-0.0103467	T
H2.6	0.0469605	T
H2.7	0.090884	T
H2.8	-0.138746	T
H2.9	0.0645665	T
M1	-0.145365	T
M2	0.0124304	T
Ma	-0.0139403	T
O	-0.0490818	T
X	0.0253774	T
C	0.0299898	U
D	0.0108083	U
G	0.00460899	U
H1	0.0370184	U
H2.1	-0.041696	U
H2.3	0.0153683	U
H2.4	-0.0404147	U
H2.5	0.0011604	U
H2.6	0.0148086	U
H2.7	0.0102637	U
H2.8	-0.0205606	U
H2.9	-0.00947261	U
M1	-0.0317829	U
M2	-0.010074	U
Ma	0.0105292	U
O	-0.0321389	U
X	0.0259424	U
C	0.0125467	V
D	0.0463356	V
G	0.190465	V
H1	0.351022	V
H2.1	-0.375845	V
H2.3	0.0319839	V
H2.4	-0.228611	V
H2.5	0.234023	V
H2.6	-0.0917677	V
H2.7	0.316759	V
H2.8	-0.391716	V
H2.9	0.0277898	V
M1	-0.389729	V
M2	-0.0556531	V
Ma	-0.0589777	V
O	-0.214296	V
X	0.0748151	V
C	0.0477909	W
D	-0.134789	W
G	0.349237	W
H1	0.0615124	W
H2.1	-0.386532	W
H2.3	0.0516598	W
H2.4	-0.239551	W
H2.5	-0.279415	W
H2.6	0.106898	W
H2.7	0.222186	W
H2.8	0.21459	W
H2.9	0.0121584	W
M1	-0.24889	W
M2	-0.332347	W
Ma	0.0376694	W
O	-0.209196	W
X	-0.0908617	W
C	0.0325704	Y
D	0.0396281	Y
G	0.00190682	Y
H1	0.0219239	Y
H2.1	0.0196181	Y
H2.3	-0.00587234	Y
H2.4	-0.00911418	Y
H2.5	0.0184455	Y
H2.6	-0.0097743	Y
H2.7	-0.0101258	Y
H2.8	-0.00769629	Y
H2.9	-0.00769629	Y
M1	-0.067697	Y
M2	0.0197685	Y
Ma	-0.00549306	Y
O	-0.0140892	Y
X	0.0304577	Y
C	0.0559666	Z
D	-0.030408	Z
G	0.0153938	Z
H1	0.0775581	Z
H2.1	-0.0419314	Z
H2.3	0.0179479	Z
H2.4	-0.0222044	Z
H2.5	-0.0114989	Z
H2.6	-0.00378238	Z
H2.7	0.0456592	Z
H2.8	-0.00347036	Z
H2.9	-0.0234009	Z
M1	-0.0335062	Z
M2	-0.0216512	Z
Ma	-0.0193492	Z
O	-0.0148801	Z
X	0.0280525	Z
