# Supplementary material for: Lifestyles shape genome size and gene content in fungal pathogens
Source: eLife. 2025 Dec 16;14:RP104975. doi: 10.7554/eLife.104975 (PMC12707824; doi:10.7554/eLife.104975)
Supplement: Figure 5—source data 4. [file elife-104975-fig5-data4.xlsx]

## Sheet: Figure5_SourceData4
trait	clade	mean	ci_low	ci_high	sign0	sign1	groups	group
CAZy	X	0.0618124	-0.0788154	0.181322	zero	zero	1	CAZy
CAZy	G	0.253649	0.185882	0.319743	zero	high	1	CAZy
CAZy	H1	0.316312	0.199964	0.408821	zero	high	1	CAZy
CAZy	H2.5	0.0414174	-0.0238158	0.115033	zero	zero	1	CAZy
CAZy	H2.6	-0.0441143	-0.0924211	0.0110335	zero	zero	1	CAZy
CAZy	M1	-0.44892	-0.459111	-0.439056	low	low	1	CAZy
CAZy	D	0.14616	0.037152	0.267777	zero	high	1	CAZy
CAZy	O	-0.26085	-0.293907	-0.224676	low	low	1	CAZy
AA	X	0.19251	-0.0291883	0.403012	zero	zero	1	CAZy
AA	G	0.343121	0.255195	0.478383	zero	high	1	CAZy
AA	H1	0.364675	0.257243	0.494263	zero	high	1	CAZy
AA	H2.5	-0.114787	-0.182093	-0.0564222	low	low	1	CAZy
AA	H2.6	-0.0633315	-0.162731	-0.00384983	low	low	1	CAZy
AA	M1	-0.586849	-0.600329	-0.569717	low	low	1	CAZy
AA	D	0.347004	0.107942	0.543724	zero	high	1	CAZy
AA	O	-0.412047	-0.44731	-0.384446	low	low	1	CAZy
CBM	X	0.100875	-0.0529679	0.241615	zero	zero	1	CAZy
CBM	G	0.196263	0.114613	0.29815	zero	high	1	CAZy
CBM	H1	0.258923	0.159795	0.362083	zero	high	1	CAZy
CBM	H2.5	0.139661	0.0514738	0.290576	zero	high	1	CAZy
CBM	H2.6	-0.0191253	-0.103055	0.0624821	zero	zero	1	CAZy
CBM	M1	-0.567885	-0.589632	-0.54458	low	low	1	CAZy
CBM	D	0.0855044	-0.0943635	0.264652	zero	zero	1	CAZy
CBM	O	-0.351882	-0.412934	-0.271502	low	low	1	CAZy
CE	X	-0.0929822	-0.250579	0.0812711	zero	zero	1	CAZy
CE	G	0.394864	0.264994	0.503568	zero	high	1	CAZy
CE	H1	0.796963	0.630778	0.946657	zero	high	1	CAZy
CE	H2.5	0.0972308	-0.0171401	0.183064	zero	zero	1	CAZy
CE	H2.6	-0.0594092	-0.109329	0.00364719	zero	zero	1	CAZy
CE	M1	-0.587907	-0.607682	-0.567303	low	low	1	CAZy
CE	D	-0.0357884	-0.160988	0.0882274	zero	zero	1	CAZy
CE	O	-0.374103	-0.47176	-0.276226	low	low	1	CAZy
GH	X	0.0784241	-0.0682138	0.214661	zero	zero	1	CAZy
GH	G	0.27693	0.200688	0.342245	zero	high	1	CAZy
GH	H1	0.29972	0.190994	0.399661	zero	high	1	CAZy
GH	H2.5	0.0813171	0.00155089	0.178056	zero	high	1	CAZy
GH	H2.6	-0.0537116	-0.138972	0.0267283	zero	zero	1	CAZy
GH	M1	-0.475562	-0.48726	-0.464384	low	low	1	CAZy
GH	D	0.157297	0.056091	0.261884	zero	high	1	CAZy
GH	O	-0.258586	-0.315422	-0.218805	low	low	1	CAZy
GT	X	-0.00670261	-0.0716175	0.0541222	zero	zero	1	CAZy
GT	G	0.0998769	0.0644198	0.13873	zero	high	1	CAZy
GT	H1	0.172868	0.123147	0.224166	zero	high	1	CAZy
GT	H2.5	0.0412845	0.00987268	0.0797088	zero	high	1	CAZy
GT	H2.6	0.00234537	-0.0229576	0.0259644	zero	zero	1	CAZy
GT	M1	-0.23897	-0.24788	-0.230531	low	low	1	CAZy
GT	D	0.0708255	0.0202579	0.119767	zero	high	1	CAZy
GT	O	-0.124294	-0.140275	-0.111321	low	low	1	CAZy
PL	X	0.0422399	-0.287713	0.247502	zero	zero	1	CAZy
PL	G	0.76972	0.580172	1.04228	zero	high	1	CAZy
PL	H1	0.462504	0.342167	0.591822	zero	high	1	CAZy
PL	H2.5	-0.399383	-0.451672	-0.34743	low	low	1	CAZy
PL	H2.6	-0.668601	-0.894026	-0.537525	low	low	1	CAZy
PL	M1	-0.650656	-0.671907	-0.622126	low	low	1	CAZy
PL	D	0.446664	-0.024315	0.836721	zero	zero	1	CAZy
PL	O	-0.648806	-0.694191	-0.592975	low	low	1	CAZy
MEROPS	X	0.0825904	-0.0443307	0.176383	zero	zero	3	other
MEROPS	G	0.190821	0.102272	0.255011	zero	high	3	other
MEROPS	H1	0.148629	0.0717458	0.230717	zero	high	3	other
MEROPS	H2.5	-0.0222962	-0.102887	0.0533646	zero	zero	3	other
MEROPS	H2.6	0.126003	0.0531356	0.173451	zero	high	3	other
MEROPS	M1	-0.336505	-0.360635	-0.321018	low	low	3	other
MEROPS	D	0.172098	0.0794226	0.248377	zero	high	3	other
MEROPS	O	-0.177958	-0.197355	-0.157223	low	low	3	other
TFs	X	-0.00497035	-0.125705	0.120293	zero	zero	3	other
TFs	G	0.0570065	0.0043784	0.12822	zero	high	3	other
TFs	H1	0.368213	0.256692	0.480999	zero	high	3	other
TFs	H2.5	0.0344967	-0.0231423	0.0924256	zero	zero	3	other
TFs	H2.6	0.0705191	-0.00729126	0.123948	zero	zero	3	other
TFs	M1	-0.340503	-0.364889	-0.32136	low	low	3	other
TFs	D	0.07815	0.00322412	0.153497	zero	high	3	other
TFs	O	-0.0013523	-0.0504851	0.0422925	zero	zero	3	other
effectors	X	0.23158	-0.00136409	0.438021	zero	zero	3	other
effectors	G	0.458677	0.270983	0.649882	zero	high	3	other
effectors	H1	0.365883	0.24098	0.496235	zero	high	3	other
effectors	H2.5	-0.155076	-0.243583	-0.0421493	low	low	3	other
effectors	H2.6	0.0296892	-0.172998	0.16629	zero	zero	3	other
effectors	M1	-0.444259	-0.568811	-0.345629	low	low	3	other
effectors	D	0.19859	0.00202368	0.334939	zero	high	3	other
effectors	O	-0.512495	-0.575479	-0.459177	low	low	3	other
tRNA	X	0.0201546	-0.0911247	0.137177	zero	zero	3	other
tRNA	G	0.48114	0.309918	0.653102	zero	high	3	other
tRNA	H1	0.493525	0.373261	0.648568	zero	high	3	other
tRNA	H2.5	0.281207	0.210399	0.336019	zero	high	3	other
tRNA	H2.6	-0.249497	-0.299108	-0.210223	low	low	3	other
tRNA	M1	0.207343	-0.00265738	0.474996	zero	zero	3	other
tRNA	D	-0.17908	-0.252531	-0.124194	low	low	3	other
tRNA	O	-0.080812	-0.215797	0.0381671	zero	zero	3	other
SMC	X	0.390081	0.196655	0.559444	zero	high	2	SMC
SMC	G	0.431192	0.261181	0.606225	zero	high	2	SMC
SMC	H1	0.0470661	-0.177707	0.198826	zero	zero	2	SMC
SMC	H2.5	-0.0418793	-0.219346	0.104959	zero	zero	2	SMC
SMC	H2.6	-0.15703	-0.221329	-0.107574	low	low	2	SMC
SMC	M1	-0.695331	-0.714437	-0.678298	low	low	2	SMC
SMC	D	0.747739	0.478067	1.03528	zero	high	2	SMC
SMC	O	-0.414245	-0.479376	-0.358428	low	low	2	SMC
hybrid	X	0.032251	-0.231141	0.271515	zero	zero	2	SMC
hybrid	G	0.29404	0.0325537	0.514925	zero	high	2	SMC
hybrid	H1	0.0614488	-0.371053	0.358412	zero	zero	2	SMC
hybrid	H2.5	0.199268	-0.107235	0.48306	zero	zero	2	SMC
hybrid	H2.6	0.485989	0.230766	0.786564	zero	high	2	SMC
hybrid	M1	-1	-1	-1	low	low	2	SMC
hybrid	D	0.53493	0.121987	0.932192	zero	high	2	SMC
hybrid	O	-0.615907	-1.13236	-0.32636	low	low	2	SMC
indole	X	0.315382	-0.276886	0.793074	zero	zero	2	SMC
indole	G	2.01323	1.38547	2.77975	zero	high	2	SMC
indole	H1	0.441293	-0.189977	1.07659	zero	zero	2	SMC
indole	H2.5	-0.723555	-1.02764	-0.44711	low	low	2	SMC
indole	H2.6	-0.612977	-0.951622	-0.371088	low	low	2	SMC
indole	M1	-1	-1	-1	low	low	2	SMC
indole	D	0.836461	0.116607	1.62136	zero	high	2	SMC
indole	O	-1	-1	-1	low	low	2	SMC
nrps	X	0.168034	-0.0309011	0.376506	zero	zero	2	SMC
nrps	G	0.21581	0.0373561	0.460278	zero	high	2	SMC
nrps	H1	0.0984161	-0.193037	0.303268	zero	zero	2	SMC
nrps	H2.5	-0.20225	-0.426694	-0.0488361	low	low	2	SMC
nrps	H2.6	0.0554851	-0.0580409	0.190949	zero	zero	2	SMC
nrps	M1	-0.699798	-0.716476	-0.668944	low	low	2	SMC
nrps	D	0.430064	0.108486	0.746615	zero	high	2	SMC
nrps	O	-0.6222	-0.689759	-0.528861	low	low	2	SMC
other	X	0.520215	0.215725	0.762109	zero	high	2	SMC
other	G	0.349651	0.17636	0.525693	zero	high	2	SMC
other	H1	0.192009	0.050181	0.339382	zero	high	2	SMC
other	H2.5	0.0984347	-0.0713632	0.233748	zero	zero	2	SMC
other	H2.6	0.102811	-0.0626107	0.241122	zero	zero	2	SMC
other	M1	-0.6085	-0.650913	-0.568263	low	low	2	SMC
other	D	0.481864	0.185491	0.758972	zero	high	2	SMC
other	O	0.0252679	-0.165609	0.199943	zero	zero	2	SMC
pks	X	0.429836	0.237328	0.636791	zero	high	2	SMC
pks	G	0.134641	-0.0632963	0.337533	zero	zero	2	SMC
pks	H1	-0.261062	-0.453281	-0.100571	low	low	2	SMC
pks	H2.5	0.258291	-0.0507657	0.439709	zero	zero	2	SMC
pks	H2.6	-0.224772	-0.390677	-0.0777952	low	low	2	SMC
pks	M1	-0.654318	-0.760183	-0.587363	low	low	2	SMC
pks	D	0.739197	0.28845	1.09563	zero	high	2	SMC
pks	O	-0.437694	-0.513682	-0.37964	low	low	2	SMC
terpene	X	0.50767	0.237016	0.676602	zero	high	2	SMC
terpene	G	0.451644	0.160495	0.735616	zero	high	2	SMC
terpene	H1	0.207094	0.0241976	0.359425	zero	high	2	SMC
terpene	H2.5	0.0259271	-0.154088	0.138953	zero	zero	2	SMC
terpene	H2.6	-0.281851	-0.386226	-0.166217	low	low	2	SMC
terpene	M1	-0.544013	-0.593411	-0.473081	low	low	2	SMC
terpene	D	0.347353	0.0541053	0.66933	zero	high	2	SMC
terpene	O	-0.278436	-0.359134	-0.193027	low	low	2	SMC
A	X	0.0202994	0.00528441	0.0395105	zero	high	0	KOG
A	G	0.000136656	-0.010125	0.0133643	zero	zero	0	KOG
A	H1	0.0443409	0.0310599	0.0557172	zero	high	0	KOG
A	H2.5	0.0104268	-0.00139806	0.0256657	zero	zero	0	KOG
A	H2.6	0.00373434	-0.0043848	0.0109039	zero	zero	0	KOG
A	M1	-0.0409458	-0.0514466	-0.0287415	low	low	0	KOG
A	D	0.0301317	0.0176941	0.0395766	zero	high	0	KOG
A	O	-0.0361135	-0.0481882	-0.0253237	low	low	0	KOG
B	X	-0.0929893	-0.124913	-0.0605014	low	low	0	KOG
B	G	-0.0103808	-0.0757912	0.025267	zero	zero	0	KOG
B	H1	0.0666815	0.0445156	0.0932197	zero	high	0	KOG
B	H2.5	-0.0104837	-0.0246363	0.00216073	zero	zero	0	KOG
B	H2.6	0.00691691	-0.0068876	0.0211274	zero	zero	0	KOG
B	M1	-0.129919	-0.14058	-0.118592	low	low	0	KOG
B	D	0.0359769	0.0110402	0.073565	zero	high	0	KOG
B	O	-0.0599627	-0.0790432	-0.0352867	low	low	0	KOG
C	X	0.0684841	-0.0154915	0.164158	zero	zero	0	KOG
C	G	0.13373	0.0795904	0.199869	zero	high	0	KOG
C	H1	0.258938	0.157066	0.37692	zero	high	0	KOG
C	H2.5	0.089797	-0.00718568	0.194537	zero	zero	0	KOG
C	H2.6	-0.0693654	-0.143762	-0.0187608	low	low	0	KOG
C	M1	-0.328582	-0.334087	-0.319318	low	low	0	KOG
C	D	0.103477	0.0288428	0.180937	zero	high	0	KOG
C	O	-0.0890171	-0.12383	-0.0592664	low	low	0	KOG
D	X	-0.0491865	-0.0607147	-0.0328341	low	low	0	KOG
D	G	-0.0154521	-0.0589544	0.00762516	zero	zero	0	KOG
D	H1	0.0383913	0.00573981	0.0659581	zero	high	0	KOG
D	H2.5	-0.00818652	-0.0193728	0.00207151	zero	zero	0	KOG
D	H2.6	0.00215576	-0.00844944	0.0123237	zero	zero	0	KOG
D	M1	-0.0416172	-0.0518614	-0.0314022	low	low	0	KOG
D	D	-0.0118334	-0.0309614	0.00723025	zero	zero	0	KOG
D	O	-0.0633641	-0.0834003	-0.0396906	low	low	0	KOG
E	X	0.0532097	-0.0713203	0.134602	zero	zero	0	KOG
E	G	0.15624	0.0847521	0.22958	zero	high	0	KOG
E	H1	0.279896	0.178925	0.390748	zero	high	0	KOG
E	H2.5	-0.0295561	-0.074822	0.0321727	zero	zero	0	KOG
E	H2.6	0.0601896	0.0141531	0.0951803	zero	high	0	KOG
E	M1	-0.268191	-0.279737	-0.255064	low	low	0	KOG
E	D	0.103296	0.048749	0.173072	zero	high	0	KOG
E	O	-0.084695	-0.119408	-0.057511	low	low	0	KOG
F	X	0.0195589	-0.080524	0.0947411	zero	zero	0	KOG
F	G	0.0841596	0.0333539	0.129371	zero	high	0	KOG
F	H1	0.12867	0.0353946	0.189487	zero	high	0	KOG
F	H2.5	0.0381988	0.000461441	0.0925833	zero	high	0	KOG
F	H2.6	-0.00713102	-0.0630931	0.032631	zero	zero	0	KOG
F	M1	-0.147136	-0.159371	-0.132805	low	low	0	KOG
F	D	0.0246767	-0.0346902	0.0771913	zero	zero	0	KOG
F	O	-0.060549	-0.0888007	-0.0328972	low	low	0	KOG
G	X	0.0847067	-0.0296111	0.193133	zero	zero	0	KOG
G	G	0.283252	0.209314	0.3751	zero	high	0	KOG
G	H1	0.283057	0.191598	0.40387	zero	high	0	KOG
G	H2.5	0.0252206	-0.0507509	0.0963936	zero	zero	0	KOG
G	H2.6	-0.0327042	-0.0968644	0.0142628	zero	zero	0	KOG
G	M1	-0.459502	-0.4767	-0.441737	low	low	0	KOG
G	D	0.114841	0.0286267	0.234138	zero	high	0	KOG
G	O	-0.169492	-0.212052	-0.11453	low	low	0	KOG
H	X	0.027239	-0.0402518	0.0988045	zero	zero	0	KOG
H	G	0.0871968	0.0410745	0.132903	zero	high	0	KOG
H	H1	0.145283	0.0836356	0.209713	zero	high	0	KOG
H	H2.5	0.00941006	-0.0294263	0.0592706	zero	zero	0	KOG
H	H2.6	-0.00522791	-0.0587556	0.043977	zero	zero	0	KOG
H	M1	-0.191455	-0.207728	-0.174564	low	low	0	KOG
H	D	0.0409009	-0.0107583	0.0935664	zero	zero	0	KOG
H	O	-0.0757347	-0.0979681	-0.0539093	low	low	0	KOG
I	X	0.148408	0.0697969	0.253395	zero	high	0	KOG
I	G	0.125286	0.0729618	0.182143	zero	high	0	KOG
I	H1	0.153039	0.0548676	0.227182	zero	high	0	KOG
I	H2.5	0.00505252	-0.0553664	0.0643401	zero	zero	0	KOG
I	H2.6	-0.0254674	-0.0896487	0.0180603	zero	zero	0	KOG
I	M1	-0.300648	-0.32689	-0.277191	low	low	0	KOG
I	D	0.257034	0.161668	0.365488	zero	high	0	KOG
I	O	-0.149706	-0.18773	-0.110679	low	low	0	KOG
J	X	0.0203918	-0.0123343	0.0490574	zero	zero	0	KOG
J	G	0.00825579	-0.00237955	0.0225839	zero	zero	0	KOG
J	H1	0.0624661	0.0399256	0.0802292	zero	high	0	KOG
J	H2.5	0.0171281	-0.00271488	0.0392627	zero	zero	0	KOG
J	H2.6	0.0183109	0.00162768	0.032396	zero	high	0	KOG
J	M1	-0.0412861	-0.0493534	-0.0358734	low	low	0	KOG
J	D	0.0239793	0.00274211	0.0506369	zero	high	0	KOG
J	O	-0.017913	-0.0264671	-0.00820215	low	low	0	KOG
K	X	0.000941234	-0.0247335	0.0282192	zero	zero	0	KOG
K	G	0.0162301	0.00443012	0.0391806	zero	high	0	KOG
K	H1	0.0721963	0.0535382	0.090819	zero	high	0	KOG
K	H2.5	0.0111328	0.00142705	0.0223088	zero	high	0	KOG
K	H2.6	-0.023634	-0.0383157	-0.0106761	low	low	0	KOG
K	M1	-0.0561319	-0.0645323	-0.0482828	low	low	0	KOG
K	D	0.0305356	0.016666	0.0433529	zero	high	0	KOG
K	O	-0.0191212	-0.031952	-0.00572247	low	low	0	KOG
L	X	-0.017419	-0.0494265	0.0185931	zero	zero	0	KOG
L	G	-0.0171161	-0.0392048	0.00808337	zero	zero	0	KOG
L	H1	0.0546977	-0.0504633	0.101584	zero	zero	0	KOG
L	H2.5	-0.0380209	-0.0983548	-0.00688272	low	low	0	KOG
L	H2.6	-0.0393663	-0.0706727	-0.00700045	low	low	0	KOG
L	M1	-0.101956	-0.112997	-0.0919916	low	low	0	KOG
L	D	0.0312189	0.0126826	0.0456041	zero	high	0	KOG
L	O	-0.0953041	-0.106683	-0.084057	low	low	0	KOG
M	X	-0.014169	-0.0824759	0.022836	zero	zero	0	KOG
M	G	0.198207	0.164098	0.232934	zero	high	0	KOG
M	H1	0.14468	0.090349	0.201309	zero	high	0	KOG
M	H2.5	-0.0151116	-0.0567296	0.030287	zero	zero	0	KOG
M	H2.6	-0.0767034	-0.108302	-0.0426391	low	low	0	KOG
M	M1	-0.241983	-0.254897	-0.228764	low	low	0	KOG
M	D	0.123822	0.045004	0.193662	zero	high	0	KOG
M	O	-0.214297	-0.245725	-0.184331	low	low	0	KOG
N	X	-0.00239285	-0.0667546	0.0748412	zero	zero	0	KOG
N	G	0.00372034	-0.0454128	0.0598725	zero	zero	0	KOG
N	H1	0.0150073	-0.0413014	0.0641022	zero	zero	0	KOG
N	H2.5	-0.0576817	-0.140135	0.0365501	zero	zero	0	KOG
N	H2.6	0.0129922	-0.0341238	0.071887	zero	zero	0	KOG
N	M1	0.0695093	0.00243837	0.140206	zero	high	0	KOG
N	D	0.0249867	-0.00917955	0.0933191	zero	zero	0	KOG
N	O	0.127932	0.062384	0.20029	zero	high	0	KOG
O	X	0.0381401	0.00141423	0.071391	zero	high	0	KOG
O	G	0.0630807	0.0370377	0.0916534	zero	high	0	KOG
O	H1	0.0853264	0.0605208	0.115117	zero	high	0	KOG
O	H2.5	-0.0194794	-0.0394551	0.00677924	zero	zero	0	KOG
O	H2.6	0.0515885	0.0243893	0.0777284	zero	high	0	KOG
O	M1	-0.139607	-0.153537	-0.126564	low	low	0	KOG
O	D	0.0497015	0.0104475	0.0845108	zero	high	0	KOG
O	O	-0.0912597	-0.103532	-0.0802039	low	low	0	KOG
P	X	0.0232582	-0.0263667	0.082405	zero	zero	0	KOG
P	G	0.162539	0.116353	0.206476	zero	high	0	KOG
P	H1	0.170029	0.131016	0.210327	zero	high	0	KOG
P	H2.5	-0.0728412	-0.0949723	-0.0346955	low	low	0	KOG
P	H2.6	0.0305814	0.00235664	0.0552867	zero	high	0	KOG
P	M1	-0.223845	-0.240699	-0.210463	low	low	0	KOG
P	D	0.0231029	-0.0517269	0.0987384	zero	zero	0	KOG
P	O	-0.129859	-0.162605	-0.101721	low	low	0	KOG
Q	X	0.255832	0.0739662	0.487202	zero	high	0	KOG
Q	G	0.33164	0.120463	0.473657	zero	high	0	KOG
Q	H1	0.36023	0.195333	0.539492	zero	high	0	KOG
Q	H2.5	0.0519028	-0.0828851	0.159856	zero	zero	0	KOG
Q	H2.6	-0.0583986	-0.165261	0.0498826	zero	zero	0	KOG
Q	M1	-0.655686	-0.676724	-0.638957	low	low	0	KOG
Q	D	0.438872	0.264551	0.642513	zero	high	0	KOG
Q	O	-0.267323	-0.312215	-0.214219	low	low	0	KOG
R	X	0.0358184	-0.0979305	0.138098	zero	zero	0	KOG
R	G	0.138414	0.0738522	0.209071	zero	high	0	KOG
R	H1	0.254318	0.123218	0.352772	zero	high	0	KOG
R	H2.5	0.0331421	-0.0302823	0.110358	zero	zero	0	KOG
R	H2.6	-0.035294	-0.095313	0.0154884	zero	zero	0	KOG
R	M1	-0.338293	-0.384269	-0.302223	low	low	0	KOG
R	D	0.137058	0.0120994	0.211315	zero	high	0	KOG
R	O	-0.137743	-0.187328	-0.103501	low	low	0	KOG
S	X	-0.0112189	-0.0518117	0.0311348	zero	zero	0	KOG
S	G	0.0435736	0.0234278	0.0671091	zero	high	0	KOG
S	H1	0.09146	0.0712769	0.107076	zero	high	0	KOG
S	H2.5	-0.00944603	-0.0271308	0.013764	zero	zero	0	KOG
S	H2.6	-0.014421	-0.0331629	0.00730257	zero	zero	0	KOG
S	M1	-0.0868027	-0.101446	-0.0710536	low	low	0	KOG
S	D	0.042404	0.00542973	0.0640025	zero	high	0	KOG
S	O	-0.04358	-0.0630146	-0.0265245	low	low	0	KOG
T	X	0.0253774	-0.0321557	0.0834946	zero	zero	0	KOG
T	G	0.0481664	0.0219667	0.072039	zero	high	0	KOG
T	H1	0.117672	0.0555693	0.174519	zero	high	0	KOG
T	H2.5	-0.0103467	-0.0311171	0.0195944	zero	zero	0	KOG
T	H2.6	0.0469605	0.0232818	0.0720181	zero	high	0	KOG
T	M1	-0.145365	-0.154355	-0.135312	low	low	0	KOG
T	D	0.0899455	0.0477583	0.139458	zero	high	0	KOG
T	O	-0.0490818	-0.0706849	-0.0265682	low	low	0	KOG
U	X	0.0259424	0.0112254	0.0414252	zero	high	0	KOG
U	G	0.00460899	-0.00616658	0.0135146	zero	zero	0	KOG
U	H1	0.0370184	0.025154	0.048763	zero	high	0	KOG
U	H2.5	0.0011604	-0.00599788	0.00987999	zero	zero	0	KOG
U	H2.6	0.0148086	-0.000823673	0.0283349	zero	zero	0	KOG
U	M1	-0.0317829	-0.0403865	-0.0223129	low	low	0	KOG
U	D	0.0108083	0.00321959	0.0209694	zero	high	0	KOG
U	O	-0.0321389	-0.039804	-0.017022	low	low	0	KOG
V	X	0.0748151	-0.058133	0.260488	zero	zero	0	KOG
V	G	0.190465	0.0946173	0.278677	zero	high	0	KOG
V	H1	0.351022	0.18415	0.561069	zero	high	0	KOG
V	H2.5	0.234023	0.0619327	0.41148	zero	high	0	KOG
V	H2.6	-0.0917677	-0.197371	0.00158262	zero	zero	0	KOG
V	M1	-0.389729	-0.413366	-0.372245	low	low	0	KOG
V	D	0.0463356	-0.0504504	0.162456	zero	zero	0	KOG
V	O	-0.214296	-0.266251	-0.166052	low	low	0	KOG
W	X	-0.0908617	-0.181775	0.0275377	zero	zero	0	KOG
W	G	0.349237	0.277108	0.446824	zero	high	0	KOG
W	H1	0.0615124	-0.0316388	0.131289	zero	zero	0	KOG
W	H2.5	-0.279415	-0.399513	-0.147308	low	low	0	KOG
W	H2.6	0.106898	-0.00519276	0.204978	zero	zero	0	KOG
W	M1	-0.24889	-0.24889	-0.24889	low	low	0	KOG
W	D	-0.134789	-0.195153	-0.0794562	low	low	0	KOG
W	O	-0.209196	-0.308778	-0.0978971	low	low	0	KOG
Y	X	0.0304577	0.00864016	0.0492543	zero	high	0	KOG
Y	G	0.00190682	-0.0153287	0.0258866	zero	zero	0	KOG
Y	H1	0.0219239	0.00119412	0.0394305	zero	high	0	KOG
Y	H2.5	0.0184455	0.00741083	0.0302038	zero	high	0	KOG
Y	H2.6	-0.0097743	-0.0186382	0.000355883	zero	zero	0	KOG
Y	M1	-0.067697	-0.0760361	-0.0531857	low	low	0	KOG
Y	D	0.0396281	0.0259699	0.0555359	zero	high	0	KOG
Y	O	-0.0140892	-0.0281604	0.00164834	zero	zero	0	KOG
Z	X	0.0280525	0.00114438	0.05409	zero	high	0	KOG
Z	G	0.0153938	0.00152534	0.0401843	zero	high	0	KOG
Z	H1	0.0775581	0.0482814	0.0951639	zero	high	0	KOG
Z	H2.5	-0.0114989	-0.0271299	0.00471561	zero	zero	0	KOG
Z	H2.6	-0.00378238	-0.0189273	0.00696953	zero	zero	0	KOG
Z	M1	-0.0335062	-0.0491954	-0.0212377	low	low	0	KOG
Z	D	-0.030408	-0.0446069	-0.0160698	low	low	0	KOG
Z	O	-0.0148801	-0.0288493	-0.000144801	low	low	0	KOG
